# Supplementary material for: Mapping Coeliac Toxic Motifs in the Prolamin Seed Storage Proteins of Barley, Rye, and Oats Using a Curated Sequence Database
Source: Front Nutr. 2020 Jul 17;7:87. doi: 10.3389/fnut.2020.00087 (PMC7379453; doi:10.3389/fnut.2020.00087)
Supplement: Supplementary file 15 [file Data_Sheet_2.xlsx]

## Sheet: UniProt reviewed prolamins
																	Normalized abundance						Raw abundance						Spectral counts
							Best identification										Condition 1			Condition 2			Condition 1			Condition 2			Condition 1			Condition 2
Peptide identifier	Unique peptide?	Ions	Deconvoluted peptide ions	Deconvoluted charges	Retention time (min)	Neutral mass (Da)	Score	Sequence	Modifications	Accession	Description	Max fold change	Highest mean condition	Lowest mean condition	Anova	Maximum CV	UNIMAN_GLUTEN_005	UNIMAN_GLUTEN_006	UNIMAN_GLUTEN_007	UNIMAN_GLUTEN_020	UNIMAN_GLUTEN_021	UNIMAN_GLUTEN_022	UNIMAN_GLUTEN_005	UNIMAN_GLUTEN_006	UNIMAN_GLUTEN_007	UNIMAN_GLUTEN_020	UNIMAN_GLUTEN_021	UNIMAN_GLUTEN_022	UNIMAN_GLUTEN_005	UNIMAN_GLUTEN_006	UNIMAN_GLUTEN_007	UNIMAN_GLUTEN_020	UNIMAN_GLUTEN_021	UNIMAN_GLUTEN_022
38.45_1624.7093n	Yes	1	#12344	2	38.4483	1624.71	5.4418	YPTSPQQSGQGQQGY		P02861	Glutenin_ high molecular weight subunit PC256 (Fragment) OS=Triticum aestivum OX=4565 PE=2 SV=1	2.56628	Condition 2	Condition 1	0.000343291	13.1813	252.715	240.409	227.229	534.659	616.864	697.105	253.335	243.225	217.834	534.659	602.123	668.172	0	0	0	1	0	1
41.67_1517.7112n	No	1	#4906	2	41.6694	1517.71	5.7789	YPTSPQQSGQGQQL		P02861	Glutenin_ high molecular weight subunit PC256 (Fragment) OS=Triticum aestivum OX=4565 PE=2 SV=1	1.32337	Condition 2	Condition 1	0.00390305	7.90444	2525.25	2854.07	2472.18	3530.51	3365.51	3494.43	2531.44	2887.49	2369.97	3530.51	3285.09	3349.4	1	1	1	1	1	1
74.47_1567.8395n	Yes	1	#3285	2	74.4689	1567.84	6.7986	LQLQPFPQPQLPY		P02863	Alpha/beta-gliadin OS=Triticum aestivum OX=4565 PE=2 SV=2	1.98735	Condition 2	Condition 1	0.000923729	12.2261	3033.09	3137.12	2481.11	5893.27	5892.47	5407.51	3040.53	3173.86	2378.54	5893.27	5751.65	5183.08	0	1	0	1	1	1
60.78_1454.7554n	Yes	1	#5475	2	60.7787	1454.76	5.2915	QLQPFPQPQLPY		P02863	Alpha/beta-gliadin OS=Triticum aestivum OX=4565 PE=2 SV=2	1.1094	Condition 2	Condition 1	0.0130202	3.41351	5677.82	5470.66	5424.97	6202.16	6291.56	5892.87	5691.74	5534.73	5200.69	6202.16	6141.21	5648.29	0	0	0	1	0	1
46.39_2326.1103n	Yes	1	#2547	3	46.393	2326.11	5.5512	SQPQPFRPQQPYPQPQPQY	[17] Hydroxyproline	P02863	Alpha/beta-gliadin OS=Triticum aestivum OX=4565 PE=2 SV=2	1.01731	Condition 2	Condition 1	0.650832	5.87464	13938.5	12561.8	12664.4	12911.6	13293.7	13637.4	13972.7	12708.9	12140.8	12911.6	12976	13071.4	0	1	0	0	1	0
71.66_1177.5853n	No	1	#13558	2	71.6614	1177.59	5.552	IPPYCTIAPF	[5] Carbamidomethyl C	P02863	Alpha/beta-gliadin OS=Triticum aestivum OX=4565 PE=2 SV=2	146.434	Condition 2	Condition 1	3.54e-05	46.6927	12.9111	6.06197	6.19343	1295	1138.93	1251.32	12.9428	6.13297	5.93738	1295	1111.71	1199.39	0	0	0	1	1	1
41.88_1625.7829n	No	1	#11240	2	41.8751	1625.78	5.9508	RPQQPYPQPQPQY		P02863	Alpha/beta-gliadin OS=Triticum aestivum OX=4565 PE=2 SV=2	4.60434	Condition 2	Condition 1	1.42e-05	8.63223	280.741	309.864	283.545	1424.28	1209.26	1391.34	281.429	313.494	271.822	1424.28	1180.36	1333.6	0	1	0	1	1	1
30.92_998.5373n	No	1	#4840	2	30.9236	998.537	5.7169	QQILQQQL	[6] Deamidation Q	P02863	Alpha/beta-gliadin OS=Triticum aestivum OX=4565 PE=2 SV=2	2.20068	Condition 2	Condition 1	0.000228098	7.70914	530.582	597.588	615.627	1189.98	1380.63	1266.93	531.883	604.586	590.175	1189.98	1347.64	1214.35	0	0	0	1	0	1
43.89_1296.6148n	No	1	#3191	2	43.8857	1296.61	5.4844	CTIAPFGIFGTN	[1] Carbamidomethyl C	P02863	Alpha/beta-gliadin OS=Triticum aestivum OX=4565 PE=2 SV=2	2.48435	Condition 2	Condition 1	5.16e-05	8.0031	865.843	821.364	865.442	1947.62	2285.83	2108.22	867.967	830.983	829.663	1947.62	2231.21	2020.73	0	0	1	1	1	0
52.10_2362.1591n	No	1	#10866	3	52.0966	2362.16	5.0879	RPSQQNPQAQGSVQPQQLPQF		P02863	Alpha/beta-gliadin OS=Triticum aestivum OX=4565 PE=2 SV=2	1.64461	Condition 1	Condition 2	0.00196373	11.7267	1442.15	1502.89	1474.59	905.737	786.117	995.5	1445.69	1520.49	1413.63	905.737	767.331	954.183	0	1	0	0	0	1
57.95_707.3328n	No	1	#1365	1	57.9537	707.333	6.8218	CTIAPF	[1] Carbamidomethyl C	P02863	Alpha/beta-gliadin OS=Triticum aestivum OX=4565 PE=2 SV=2	1.21577	Condition 2	Condition 1	0.000371476	3.01184	4162.29	4331.83	4416.9	5220.55	5253.08	5223.19	4172.5	4382.57	4234.3	5220.55	5127.55	5006.41	0	1	0	1	1	1
40.28_702.3353n	No	1	#953	1	40.2762	702.335	6.4829	SQPQPF		P02863	Alpha/beta-gliadin OS=Triticum aestivum OX=4565 PE=2 SV=2	1.10922	Condition 2	Condition 1	0.0466925	5.6721	6733.33	6788.28	7445.79	7800.02	7498.08	7959.46	6749.84	6867.79	7137.96	7800.02	7318.9	7629.11	0	1	0	1	1	1
50.29_607.2981n	No	1	#383	1	50.2929	607.298	6.8892	GIFGTN		P02863	Alpha/beta-gliadin OS=Triticum aestivum OX=4565 PE=2 SV=2	1.45565	Condition 2	Condition 1	0.000658761	6.52055	10486.2	10696.1	10881.7	16627.4	15437.3	14609.3	10511.9	10821.4	10431.8	16627.4	15068.4	14002.9	1	1	1	1	1	1
43.78_1849.9078n	No	2	#3404,#8312	2,3	43.7828	1849.91	5.3292	ALQTLPAMCNVYIPPY	[9] Carbamidomethyl C	P02863	Alpha/beta-gliadin OS=Triticum aestivum OX=4565 PE=2 SV=2	1.10516	Condition 2	Condition 1	0.0102187	3.2282	13792.9	14713.2	14257.7	15628.9	16111.8	15520.2	13826.7	14885.5	13668.2	15628.9	15726.8	14876	0	1	0	0	1	1
49.96_2134.0351n	No	2	#10186,#1593	2,3	49.9587	2134.04	5.2734	EEIRNLALQTLPAMCNVY	[15] Carbamidomethyl C	P02863	Alpha/beta-gliadin OS=Triticum aestivum OX=4565 PE=2 SV=2	1.2219	Condition 2	Condition 1	2.67e-05	1.38907	18153.6	18434.9	18233.4	22638.3	22017.9	22330.5	18198.1	18650.8	17479.5	22638.3	21491.8	21403.7	0	2	0	2	2	2
61.82_2363.1663n	No	1	#478	3	61.8175	2363.17	5.4315	RPSQQNPQAQGSVQPQQLPQF	[6] Deamidation N	P02863	Alpha/beta-gliadin OS=Triticum aestivum OX=4565 PE=2 SV=2	2.21349	Condition 1	Condition 2	3.9e-05	6.56205	35520.7	35251.4	39559.6	16706.1	17000.3	16138.7	35607.8	35664.3	37924.1	16706.1	16594.1	15468.9	0	0	0	0	1	1
47.96_1542.7807n	Yes	1	#3416	2	47.9575	1542.78	5.0105	LQPQLPYSQPQPF	[9] Deamidation Q	P04721	Alpha/beta-gliadin A-I OS=Triticum aestivum OX=4565 PE=2 SV=1	1.56007	Condition 2	Condition 1	9.9e-05	4.4256	3910.64	3638.41	3613.99	5736.67	5960.89	5717.54	3920.24	3681.02	3464.58	5736.67	5818.45	5480.25	0	0	0	1	1	0
49.31_1542.7799n	Yes	1	#1535	2	49.3053	1542.78	5.1515	LQPQLPYSQPQPF	[2] Deamidation Q	P04721	Alpha/beta-gliadin A-I OS=Triticum aestivum OX=4565 PE=2 SV=1	1.45413	Condition 2	Condition 1	5.59e-05	3.38281	10861.7	10601.3	10651.4	16154.7	15139.5	15404.4	10888.4	10725.5	10211	16154.7	14777.7	14765.1	0	0	0	1	1	0
41.88_1625.7829n	No	1	#11240	2	41.8751	1625.78	5.9508	RPQQPYPQPQPQY		P04721	Alpha/beta-gliadin A-I OS=Triticum aestivum OX=4565 PE=2 SV=1	4.60434	Condition 2	Condition 1	1.42e-05	8.63223	280.741	309.864	283.545	1424.28	1209.26	1391.34	281.429	313.494	271.822	1424.28	1180.36	1333.6	0	1	0	1	1	1
40.28_702.3353n	No	1	#953	1	40.2762	702.335	6.4829	SQPQPF		P04721	Alpha/beta-gliadin A-I OS=Triticum aestivum OX=4565 PE=2 SV=1	1.10922	Condition 2	Condition 1	0.0466925	5.6721	6733.33	6788.28	7445.79	7800.02	7498.08	7959.46	6749.84	6867.79	7137.96	7800.02	7318.9	7629.11	0	1	0	1	1	1
61.82_2363.1663n	No	1	#478	3	61.8175	2363.17	5.4315	RPSQQNPQAQGSVQPQQLPQF	[6] Deamidation N	P04721	Alpha/beta-gliadin A-I OS=Triticum aestivum OX=4565 PE=2 SV=1	2.21349	Condition 1	Condition 2	3.9e-05	6.56205	35520.7	35251.4	39559.6	16706.1	17000.3	16138.7	35607.8	35664.3	37924.1	16706.1	16594.1	15468.9	0	0	0	0	1	1
37.91_1924.9704n	Yes	2	#7834,#18127	4,5	37.9063	1924.97	5.1568	QPFPQPQLPYPQPQPF	[N-term] Pyroglutamic acid	P04722	Alpha/beta-gliadin A-II OS=Triticum aestivum OX=4565 PE=2 SV=1	1.07417	Condition 1	Condition 2	0.555825	17.2791	589.457	487.297	585.26	414.727	583.219	549.308	590.902	493.004	561.063	414.727	569.282	526.51	0	1	1	0	0	1
57.33_1754.8923n	Yes	2	#2930,#10076	2,3	57.3347	1754.89	5.155	QPQQLPQFEEIRNL	[6] Hydroxyproline	P04722	Alpha/beta-gliadin A-II OS=Triticum aestivum OX=4565 PE=2 SV=1	1.2013	Condition 2	Condition 1	0.00236965	4.4306	3937.78	4048.62	3709.83	4657.47	4640.2	4752.99	3947.43	4096.04	3556.45	4657.47	4529.31	4555.73	1	1	0	0	0	0
54.18_2399.1876n	Yes	2	#139,#4141	3,4	54.1752	2399.19	5.3318	QPSQQNPQAQGSFQPQQLPQF	[N-term] Pyroglutamic acid	P04722	Alpha/beta-gliadin A-II OS=Triticum aestivum OX=4565 PE=2 SV=1	1.12978	Condition 1	Condition 2	0.00055677	1.89723	41624.6	41292.4	42805.2	36758.8	37071	37450.1	41726.7	41776	41035.6	36758.8	36185.1	35895.8	0	0	0	1	1	1
48.04_1619.7925n	Yes	1	#20332	2	48.0433	1619.79	5.8711	QNPSQQQPQEQVPL		P04722	Alpha/beta-gliadin A-II OS=Triticum aestivum OX=4565 PE=2 SV=1	1.23342	Condition 2	Condition 1	0.0456689	9.39492	161.476	139.632	136.241	190.955	186.231	162.249	161.872	141.267	130.608	190.955	181.781	155.515	1	0	0	1	0	0
33.53_1562.7094n	Yes	1	#7572	2	33.5273	1562.71	5.1858	FQPSQQNPQAQGSF		P04722	Alpha/beta-gliadin A-II OS=Triticum aestivum OX=4565 PE=2 SV=1	4.4287	Condition 2	Condition 1	0.00103723	27.7609	253.748	402.673	449.896	1585.63	1583.67	1730.25	254.37	407.389	431.296	1585.63	1545.82	1658.44	0	1	0	1	0	0
74.01_3169.5373n	Yes	1	#15637	3	74.006	3169.54	5.2761	QPSQQNPQAQGSFQPQQLPQFEEIRNL	[N-term] Pyroglutamic acid|[19] Hydroxyproline	P04722	Alpha/beta-gliadin A-II OS=Triticum aestivum OX=4565 PE=2 SV=1	1.86281	Condition 1	Condition 2	0.0459598	27.6089	736.988	692.005	422.027	390.508	341.737	261.429	738.795	700.11	404.579	390.508	333.57	250.579	0	0	0	0	1	1
58.45_1625.8196n	Yes	1	#11211	2	58.4509	1625.82	5.1358	RPQQPYPQPQPQY		P04722	Alpha/beta-gliadin A-II OS=Triticum aestivum OX=4565 PE=2 SV=1	1.20744	Condition 2	Condition 1	0.135534	18.1081	1881.6	1484.95	1332.12	1941.81	1951.56	1780	1886.22	1502.34	1277.05	1941.81	1904.92	1706.12	1	0	1	0	0	0
70.04_3136.5452n	Yes	1	#7553	3	70.0399	3136.55	5.3741	QPSQQNPQAQGSFQPQQLPQFEEIRNL		P04722	Alpha/beta-gliadin A-II OS=Triticum aestivum OX=4565 PE=2 SV=1	1.06329	Condition 1	Condition 2	0.0428037	3.57612	2161.01	2308.13	2183.27	2085.77	2071.77	2098.91	2166.31	2335.16	2093.01	2085.77	2022.26	2011.8	1	1	0	0	0	1
37.31_1877.9131n	Yes	1	#3765	2	37.313	1877.91	5.7269	QLQNPSQQQPQEQVPL	[5] Hydroxyproline|[13] Deamidation Q	P04722	Alpha/beta-gliadin A-II OS=Triticum aestivum OX=4565 PE=2 SV=1	1.12222	Condition 2	Condition 1	0.124547	8.85342	4195.54	4517.26	4545.87	4458.27	5145.37	5275.48	4205.83	4570.17	4357.93	4458.27	5022.41	5056.53	0	0	0	0	1	1
47.92_1434.7242n	Yes	1	#1936	2	47.9233	1434.72	5.2446	QQHNIAHGSSQVL	[N-term] Pyroglutamic acid	P04722	Alpha/beta-gliadin A-II OS=Triticum aestivum OX=4565 PE=2 SV=1	1.24426	Condition 2	Condition 1	0.00171758	4.20131	6444.08	6810.4	6626.64	7861.19	8342.7	8533.4	6459.88	6890.16	6352.68	7861.19	8143.33	8179.23	1	0	0	1	0	0
44.65_1418.6986n	Yes	1	#982	2	44.6504	1418.7	5.2334	QQHNIAHGSSQVL	[4] Deamidation N	P04722	Alpha/beta-gliadin A-II OS=Triticum aestivum OX=4565 PE=2 SV=1	1.14459	Condition 2	Condition 1	0.0193112	4.41161	18207.2	19588.1	19744.8	21086.8	21820	22952.8	18251.8	19817.6	18928.5	21086.8	21298.6	22000.2	0	0	0	1	1	0
40.36_1636.8167n	Yes	1	#307	2	40.3619	1636.82	5.6322	QNPSQQQPQEQVPL	[N-term] Pyroglutamic acid	P04722	Alpha/beta-gliadin A-II OS=Triticum aestivum OX=4565 PE=2 SV=1	1.04882	Condition 2	Condition 1	0.538328	10.0551	23340.9	21533.4	23736	21211	25572.2	25176.6	23398.1	21785.6	22754.7	21211	24961.2	24131.7	1	1	0	0	1	1
73.99_3152.5301n	Yes	1	#373	3	73.9888	3152.53	5.1731	QPSQQNPQAQGSFQPQQLPQFEEIRNL	[15] Hydroxyproline	P04722	Alpha/beta-gliadin A-II OS=Triticum aestivum OX=4565 PE=2 SV=1	1.46999	Condition 1	Condition 2	0.00168454	8.04123	58811.3	56496.7	50234.5	37649.3	38728.9	36236.2	58955.5	57158.4	48157.7	37649.3	37803.4	34732.3	0	0	1	0	1	0
71.66_1177.5853n	No	1	#13558	2	71.6614	1177.59	5.552	IPPYCTIAPF	[5] Carbamidomethyl C	P04722	Alpha/beta-gliadin A-II OS=Triticum aestivum OX=4565 PE=2 SV=1	146.434	Condition 2	Condition 1	3.54e-05	46.6927	12.9111	6.06197	6.19343	1295	1138.93	1251.32	12.9428	6.13297	5.93738	1295	1111.71	1199.39	0	0	0	1	1	1
60.12_1467.7874n	No	1	#11144	2	60.1172	1467.79	6.1937	QQQLIPCRDVVL	[7] Carbamidomethyl C	P04722	Alpha/beta-gliadin A-II OS=Triticum aestivum OX=4565 PE=2 SV=1	17.6425	Condition 2	Condition 1	6.92e-05	30.1389	48.1694	40.7583	71.6601	939.026	994.79	899.353	48.2875	41.2356	68.6975	939.026	971.018	862.027	0	0	0	1	1	1
41.88_1625.7829n	No	1	#11240	2	41.8751	1625.78	5.9508	RPQQPYPQPQPQY		P04722	Alpha/beta-gliadin A-II OS=Triticum aestivum OX=4565 PE=2 SV=1	4.60434	Condition 2	Condition 1	1.42e-05	8.63223	280.741	309.864	283.545	1424.28	1209.26	1391.34	281.429	313.494	271.822	1424.28	1180.36	1333.6	0	1	0	1	1	1
28.73_1665.7875n	No	1	#5617	2	28.7253	1665.79	5.2534	QTLPAMCNVYIPPY	[7] Carbamidomethyl C	P04722	Alpha/beta-gliadin A-II OS=Triticum aestivum OX=4565 PE=2 SV=1	4.56834	Condition 2	Condition 1	8.46e-05	14.9503	303.105	339.696	406.222	1639.84	1474.66	1677.78	303.848	343.674	389.427	1639.84	1439.42	1608.15	1	0	1	0	0	0
45.27_1491.6764n	No	1	#10404	2	45.2675	1491.68	5.9572	QQPQQQYPSGQGF		P04722	Alpha/beta-gliadin A-II OS=Triticum aestivum OX=4565 PE=2 SV=1	4.08805	Condition 2	Condition 1	1.43e-05	9.2693	404.761	430.457	412.473	1881.25	1625.61	1593.75	405.754	435.499	395.42	1881.25	1586.77	1527.61	0	1	0	1	1	1
30.92_998.5373n	No	1	#4840	2	30.9236	998.537	5.7169	QQILQQQL	[6] Deamidation Q	P04722	Alpha/beta-gliadin A-II OS=Triticum aestivum OX=4565 PE=2 SV=1	2.20068	Condition 2	Condition 1	0.000228098	7.70914	530.582	597.588	615.627	1189.98	1380.63	1266.93	531.883	604.586	590.175	1189.98	1347.64	1214.35	0	0	0	1	0	1
43.89_1296.6148n	No	1	#3191	2	43.8857	1296.61	5.4844	CTIAPFGIFGTN	[1] Carbamidomethyl C	P04722	Alpha/beta-gliadin A-II OS=Triticum aestivum OX=4565 PE=2 SV=1	2.48435	Condition 2	Condition 1	5.16e-05	8.0031	865.843	821.364	865.442	1947.62	2285.83	2108.22	867.967	830.983	829.663	1947.62	2231.21	2020.73	0	0	1	1	1	0
28.74_1665.7924n	No	1	#2619	3	28.7424	1665.79	5.2534	QTLPAMCNVYIPPY	[7] Carbamidomethyl C	P04722	Alpha/beta-gliadin A-II OS=Triticum aestivum OX=4565 PE=2 SV=1	3.06224	Condition 2	Condition 1	1.16e-05	5.75602	1778.09	1764.77	1953.73	5397.6	5540.81	5893.48	1782.45	1785.44	1872.96	5397.6	5408.4	5648.88	1	0	1	0	0	0
57.95_707.3328n	No	1	#1365	1	57.9537	707.333	6.8218	CTIAPF	[1] Carbamidomethyl C	P04722	Alpha/beta-gliadin A-II OS=Triticum aestivum OX=4565 PE=2 SV=1	1.21577	Condition 2	Condition 1	0.000371476	3.01184	4162.29	4331.83	4416.9	5220.55	5253.08	5223.19	4172.5	4382.57	4234.3	5220.55	5127.55	5006.41	0	1	0	1	1	1
50.29_607.2981n	No	1	#383	1	50.2929	607.298	6.8892	GIFGTN		P04722	Alpha/beta-gliadin A-II OS=Triticum aestivum OX=4565 PE=2 SV=1	1.45565	Condition 2	Condition 1	0.000658761	6.52055	10486.2	10696.1	10881.7	16627.4	15437.3	14609.3	10511.9	10821.4	10431.8	16627.4	15068.4	14002.9	1	1	1	1	1	1
45.81_728.4097n	No	1	#123	1	45.8101	728.41	6.2181	QLVQQL	[4] Deamidation Q	P04722	Alpha/beta-gliadin A-II OS=Triticum aestivum OX=4565 PE=2 SV=1	1.90985	Condition 2	Condition 1	1.67e-05	4.21846	13113.5	13414.5	13621	24961	24913.2	26804.2	13145.6	13571.6	13057.9	24961	24317.9	25691.7	1	0	0	1	0	1
43.78_1849.9078n	No	2	#3404,#8312	2,3	43.7828	1849.91	5.3292	ALQTLPAMCNVYIPPY	[9] Carbamidomethyl C	P04722	Alpha/beta-gliadin A-II OS=Triticum aestivum OX=4565 PE=2 SV=1	1.10516	Condition 2	Condition 1	0.0102187	3.2282	13792.9	14713.2	14257.7	15628.9	16111.8	15520.2	13826.7	14885.5	13668.2	15628.9	15726.8	14876	0	1	0	0	1	1
49.96_2134.0351n	No	2	#10186,#1593	2,3	49.9587	2134.04	5.2734	EEIRNLALQTLPAMCNVY	[15] Carbamidomethyl C	P04722	Alpha/beta-gliadin A-II OS=Triticum aestivum OX=4565 PE=2 SV=1	1.2219	Condition 2	Condition 1	2.67e-05	1.38907	18153.6	18434.9	18233.4	22638.3	22017.9	22330.5	18198.1	18650.8	17479.5	22638.3	21491.8	21403.7	0	2	0	2	2	2
53.46_1349.6498n	Yes	1	#8643	2	53.4615	1349.65	5.3202	QQSSYQQLQQL		P04723	Alpha/beta-gliadin A-III OS=Triticum aestivum OX=4565 PE=2 SV=1	1.78512	Condition 1	Condition 2	0.000133196	5.48281	2130.07	2057.54	1911.25	1179.68	1087.03	1149.78	2135.3	2081.64	1832.23	1179.68	1061.05	1102.06	1	0	1	0	0	0
43.85_771.4139n	Yes	1	#679	1	43.8514	771.414	5.0168	QEIRNL		P04723	Alpha/beta-gliadin A-III OS=Triticum aestivum OX=4565 PE=2 SV=1	1.74098	Condition 2	Condition 1	4.27e-05	3.80511	5264.65	5521.67	5591.66	9105.04	9599.06	9809.59	5277.56	5586.34	5360.49	9105.04	9369.68	9402.46	1	0	1	1	0	0
69.26_1365.6631n	No	1	#13033	2	69.2584	1365.66	5.5303	IPPYCSTTIAPF	[5] Carbamidomethyl C	P04723	Alpha/beta-gliadin A-III OS=Triticum aestivum OX=4565 PE=2 SV=1	335.331	Condition 2	Condition 1	3.11e-07	15.1967	6.30765	5.30792	7.21491	2089.1	2125.63	2099.72	6.32312	5.37009	6.91663	2089.1	2074.83	2012.57	0	0	0	1	1	1
60.12_1467.7874n	No	1	#11144	2	60.1172	1467.79	6.1937	QQQLIPCRDVVL	[7] Carbamidomethyl C	P04723	Alpha/beta-gliadin A-III OS=Triticum aestivum OX=4565 PE=2 SV=1	17.6425	Condition 2	Condition 1	6.92e-05	30.1389	48.1694	40.7583	71.6601	939.026	994.79	899.353	48.2875	41.2356	68.6975	939.026	971.018	862.027	0	0	0	1	1	1
28.73_1665.7875n	No	1	#5617	2	28.7253	1665.79	5.2534	QTLPAMCNVYIPPY	[7] Carbamidomethyl C	P04723	Alpha/beta-gliadin A-III OS=Triticum aestivum OX=4565 PE=2 SV=1	4.56834	Condition 2	Condition 1	8.46e-05	14.9503	303.105	339.696	406.222	1639.84	1474.66	1677.78	303.848	343.674	389.427	1639.84	1439.42	1608.15	1	0	1	0	0	0
30.92_998.5373n	No	1	#4840	2	30.9236	998.537	5.7169	QQILQQQL	[6] Deamidation Q	P04723	Alpha/beta-gliadin A-III OS=Triticum aestivum OX=4565 PE=2 SV=1	2.20068	Condition 2	Condition 1	0.000228098	7.70914	530.582	597.588	615.627	1189.98	1380.63	1266.93	531.883	604.586	590.175	1189.98	1347.64	1214.35	0	0	0	1	0	1
28.74_1665.7924n	No	1	#2619	3	28.7424	1665.79	5.2534	QTLPAMCNVYIPPY	[7] Carbamidomethyl C	P04723	Alpha/beta-gliadin A-III OS=Triticum aestivum OX=4565 PE=2 SV=1	3.06224	Condition 2	Condition 1	1.16e-05	5.75602	1778.09	1764.77	1953.73	5397.6	5540.81	5893.48	1782.45	1785.44	1872.96	5397.6	5408.4	5648.88	1	0	1	0	0	0
58.06_895.4119n	No	1	#637	1	58.0566	895.412	6.4534	CSTTIAPF	[1] Carbamidomethyl C	P04723	Alpha/beta-gliadin A-III OS=Triticum aestivum OX=4565 PE=2 SV=1	1.09747	Condition 2	Condition 1	0.0254126	3.92026	8686.74	8068.07	8198.72	8978.54	9008.63	9398.54	8708.04	8162.56	7859.76	8978.54	8793.35	9008.47	1	1	1	1	1	1
50.29_607.2981n	No	1	#383	1	50.2929	607.298	6.8892	GIFGTN		P04723	Alpha/beta-gliadin A-III OS=Triticum aestivum OX=4565 PE=2 SV=1	1.45565	Condition 2	Condition 1	0.000658761	6.52055	10486.2	10696.1	10881.7	16627.4	15437.3	14609.3	10511.9	10821.4	10431.8	16627.4	15068.4	14002.9	1	1	1	1	1	1
43.78_1849.9078n	No	2	#3404,#8312	2,3	43.7828	1849.91	5.3292	ALQTLPAMCNVYIPPY	[9] Carbamidomethyl C	P04723	Alpha/beta-gliadin A-III OS=Triticum aestivum OX=4565 PE=2 SV=1	1.10516	Condition 2	Condition 1	0.0102187	3.2282	13792.9	14713.2	14257.7	15628.9	16111.8	15520.2	13826.7	14885.5	13668.2	15628.9	15726.8	14876	0	1	0	0	1	1
60.12_1467.7874n	No	1	#11144	2	60.1172	1467.79	6.1937	QQQLIPCRDVVL	[7] Carbamidomethyl C	P04724	Alpha/beta-gliadin A-IV OS=Triticum aestivum OX=4565 PE=2 SV=1	17.6425	Condition 2	Condition 1	6.92e-05	30.1389	48.1694	40.7583	71.6601	939.026	994.79	899.353	48.2875	41.2356	68.6975	939.026	971.018	862.027	0	0	0	1	1	1
30.92_998.5373n	No	1	#4840	2	30.9236	998.537	5.7169	QQILQQQL	[6] Deamidation Q	P04724	Alpha/beta-gliadin A-IV OS=Triticum aestivum OX=4565 PE=2 SV=1	2.20068	Condition 2	Condition 1	0.000228098	7.70914	530.582	597.588	615.627	1189.98	1380.63	1266.93	531.883	604.586	590.175	1189.98	1347.64	1214.35	0	0	0	1	0	1
71.73_976.5040n	No	1	#4395	1	71.73	976.504	5.7685	CTIAPVGIF	[1] Carbamidomethyl C	P04724	Alpha/beta-gliadin A-IV OS=Triticum aestivum OX=4565 PE=2 SV=1	1.28359	Condition 2	Condition 1	0.0326475	9.37695	1422.1	1350.32	1184.73	1511.51	1762.27	1805.58	1425.59	1366.13	1135.75	1511.51	1720.16	1730.64	0	0	0	1	0	1
60.12_1467.7874n	No	1	#11144	2	60.1172	1467.79	6.1937	QQQLIPCRDVVL	[7] Carbamidomethyl C	P04725	Alpha/beta-gliadin A-V OS=Triticum aestivum OX=4565 PE=2 SV=1	17.6425	Condition 2	Condition 1	6.92e-05	30.1389	48.1694	40.7583	71.6601	939.026	994.79	899.353	48.2875	41.2356	68.6975	939.026	971.018	862.027	0	0	0	1	1	1
57.34_741.4389n	No	1	#9900	1	57.3433	741.439	5.1939	QLLQQL		P04725	Alpha/beta-gliadin A-V OS=Triticum aestivum OX=4565 PE=2 SV=1	6.66163	Condition 2	Condition 1	0.000509535	34.9859	133.992	75.0268	77.3417	639.193	640.094	628.338	134.32	75.9055	74.1441	639.193	624.797	602.26	0	0	0	1	0	1
30.92_998.5373n	No	1	#4840	2	30.9236	998.537	5.7169	QQILQQQL	[6] Deamidation Q	P04725	Alpha/beta-gliadin A-V OS=Triticum aestivum OX=4565 PE=2 SV=1	2.20068	Condition 2	Condition 1	0.000228098	7.70914	530.582	597.588	615.627	1189.98	1380.63	1266.93	531.883	604.586	590.175	1189.98	1347.64	1214.35	0	0	0	1	0	1
72.73_1339.6701n	No	1	#1427	2	72.7342	1339.67	5.0572	IPPHCSTTIAPF	[5] Carbamidomethyl C	P04725	Alpha/beta-gliadin A-V OS=Triticum aestivum OX=4565 PE=2 SV=1	2.03781	Condition 2	Condition 1	0.000151543	6.7962	4751.59	4601.79	4272.03	8546.61	9747.31	9472.08	4763.24	4655.69	4095.41	8546.61	9514.38	9078.96	0	0	0	1	0	1
53.39_1500.7898n	Yes	1	#2868	2	53.3929	1500.79	5.2741	QQHNIAHARSQVL		P04726	Alpha/beta-gliadin clone PW1215 OS=Triticum aestivum OX=4565 PE=3 SV=1	11.2501	Condition 2	Condition 1	2.42e-05	14.9503	452.352	356.799	348.558	4884.33	4309.83	3830.14	453.461	360.978	334.148	4884.33	4206.84	3671.18	1	0	0	0	1	0
33.44_2628.2869n	Yes	1	#10802	3	33.4416	2628.29	5.2076	QTLPRMCNVYIPPYCSTTIAPF	[7] Carbamidomethyl C|[15] Carbamidomethyl C	P04726	Alpha/beta-gliadin clone PW1215 OS=Triticum aestivum OX=4565 PE=3 SV=1	1.02637	Condition 1	Condition 2	0.843643	14.5546	738.121	764.891	578.166	683.297	667.155	677.263	739.931	773.849	554.263	683.297	651.212	649.154	0	0	0	1	1	1
46.15_1750.8456n	Yes	1	#6423	2	46.153	1750.85	5.2975	QTLPRMCNVYIPPY	[7] Carbamidomethyl C	P04726	Alpha/beta-gliadin clone PW1215 OS=Triticum aestivum OX=4565 PE=3 SV=1	1.3702	Condition 1	Condition 2	0.00324013	6.18469	1127.16	1228.89	1273.06	864.809	942.938	840.859	1129.93	1243.28	1220.43	864.809	920.405	805.961	1	1	0	1	1	1
36.68_725.4121n	Yes	1	#1753	2	36.6787	725.412	5.5556	QPLQQL		P04726	Alpha/beta-gliadin clone PW1215 OS=Triticum aestivum OX=4565 PE=3 SV=1	1.13041	Condition 2	Condition 1	0.0568049	6.4605	2397.73	2417.68	2608.16	2616.97	2796.28	2978.39	2403.61	2445.99	2500.33	2616.97	2729.46	2854.78	1	1	1	1	1	1
33.31_1414.6494n	Yes	1	#3374	2	33.3109	1414.65	5.3346	QPLQQLCCQQL	[7] Carbamidomethyl C|[8] Carbamidomethyl C	P04726	Alpha/beta-gliadin clone PW1215 OS=Triticum aestivum OX=4565 PE=3 SV=1	1.15407	Condition 2	Condition 1	0.0789419	9.04473	4167.16	4349.65	4600.15	4551.92	5134.14	5451.85	4177.38	4400.59	4409.96	4551.92	5011.45	5225.58	1	0	1	0	1	0
49.32_1777.8548n	Yes	1	#1484	2	49.3225	1777.85	5.3457	HQQQRQQQPSSQVSL		P04726	Alpha/beta-gliadin clone PW1215 OS=Triticum aestivum OX=4565 PE=3 SV=1	1.57769	Condition 1	Condition 2	0.000916925	9.12251	12276.1	11940.1	12083.4	8475.7	7309.57	7222.86	12306.2	12079.9	11583.9	8475.7	7134.89	6923.09	0	0	0	0	1	1
69.26_1365.6631n	No	1	#13033	2	69.2584	1365.66	5.5303	IPPYCSTTIAPF	[5] Carbamidomethyl C	P04726	Alpha/beta-gliadin clone PW1215 OS=Triticum aestivum OX=4565 PE=3 SV=1	335.331	Condition 2	Condition 1	3.11e-07	15.1967	6.30765	5.30792	7.21491	2089.1	2125.63	2099.72	6.32312	5.37009	6.91663	2089.1	2074.83	2012.57	0	0	0	1	1	1
60.12_1467.7874n	No	1	#11144	2	60.1172	1467.79	6.1937	QQQLIPCRDVVL	[7] Carbamidomethyl C	P04726	Alpha/beta-gliadin clone PW1215 OS=Triticum aestivum OX=4565 PE=3 SV=1	17.6425	Condition 2	Condition 1	6.92e-05	30.1389	48.1694	40.7583	71.6601	939.026	994.79	899.353	48.2875	41.2356	68.6975	939.026	971.018	862.027	0	0	0	1	1	1
45.27_1491.6764n	No	1	#10404	2	45.2675	1491.68	5.9572	QQPQQQYPSGQGF		P04726	Alpha/beta-gliadin clone PW1215 OS=Triticum aestivum OX=4565 PE=3 SV=1	4.08805	Condition 2	Condition 1	1.43e-05	9.2693	404.761	430.457	412.473	1881.25	1625.61	1593.75	405.754	435.499	395.42	1881.25	1586.77	1527.61	0	1	0	1	1	1
30.92_998.5373n	No	1	#4840	2	30.9236	998.537	5.7169	QQILQQQL	[6] Deamidation Q	P04726	Alpha/beta-gliadin clone PW1215 OS=Triticum aestivum OX=4565 PE=3 SV=1	2.20068	Condition 2	Condition 1	0.000228098	7.70914	530.582	597.588	615.627	1189.98	1380.63	1266.93	531.883	604.586	590.175	1189.98	1347.64	1214.35	0	0	0	1	0	1
58.06_895.4119n	No	1	#637	1	58.0566	895.412	6.4534	CSTTIAPF	[1] Carbamidomethyl C	P04726	Alpha/beta-gliadin clone PW1215 OS=Triticum aestivum OX=4565 PE=3 SV=1	1.09747	Condition 2	Condition 1	0.0254126	3.92026	8686.74	8068.07	8198.72	8978.54	9008.63	9398.54	8708.04	8162.56	7859.76	8978.54	8793.35	9008.47	1	1	1	1	1	1
50.29_607.2981n	No	1	#383	1	50.2929	607.298	6.8892	GIFGTN		P04726	Alpha/beta-gliadin clone PW1215 OS=Triticum aestivum OX=4565 PE=3 SV=1	1.45565	Condition 2	Condition 1	0.000658761	6.52055	10486.2	10696.1	10881.7	16627.4	15437.3	14609.3	10511.9	10821.4	10431.8	16627.4	15068.4	14002.9	1	1	1	1	1	1
60.12_1467.7874n	No	1	#11144	2	60.1172	1467.79	6.1937	QQQLIPCRDVVL	[7] Carbamidomethyl C	P04727	Alpha/beta-gliadin clone PW8142 OS=Triticum aestivum OX=4565 PE=3 SV=1	17.6425	Condition 2	Condition 1	6.92e-05	30.1389	48.1694	40.7583	71.6601	939.026	994.79	899.353	48.2875	41.2356	68.6975	939.026	971.018	862.027	0	0	0	1	1	1
57.34_741.4389n	No	1	#9900	1	57.3433	741.439	5.1939	QLLQQL		P04727	Alpha/beta-gliadin clone PW8142 OS=Triticum aestivum OX=4565 PE=3 SV=1	6.66163	Condition 2	Condition 1	0.000509535	34.9859	133.992	75.0268	77.3417	639.193	640.094	628.338	134.32	75.9055	74.1441	639.193	624.797	602.26	0	0	0	1	0	1
30.92_998.5373n	No	1	#4840	2	30.9236	998.537	5.7169	QQILQQQL	[6] Deamidation Q	P04727	Alpha/beta-gliadin clone PW8142 OS=Triticum aestivum OX=4565 PE=3 SV=1	2.20068	Condition 2	Condition 1	0.000228098	7.70914	530.582	597.588	615.627	1189.98	1380.63	1266.93	531.883	604.586	590.175	1189.98	1347.64	1214.35	0	0	0	1	0	1
72.73_1339.6701n	No	1	#1427	2	72.7342	1339.67	5.0572	IPPHCSTTIAPF	[5] Carbamidomethyl C	P04727	Alpha/beta-gliadin clone PW8142 OS=Triticum aestivum OX=4565 PE=3 SV=1	2.03781	Condition 2	Condition 1	0.000151543	6.7962	4751.59	4601.79	4272.03	8546.61	9747.31	9472.08	4763.24	4655.69	4095.41	8546.61	9514.38	9078.96	0	0	0	1	0	1
50.29_607.2981n	No	1	#383	1	50.2929	607.298	6.8892	GIFGTN		P04727	Alpha/beta-gliadin clone PW8142 OS=Triticum aestivum OX=4565 PE=3 SV=1	1.45565	Condition 2	Condition 1	0.000658761	6.52055	10486.2	10696.1	10881.7	16627.4	15437.3	14609.3	10511.9	10821.4	10431.8	16627.4	15068.4	14002.9	1	1	1	1	1	1
71.66_1177.5853n	No	1	#13558	2	71.6614	1177.59	5.552	IPPYCTIAPF	[5] Carbamidomethyl C	P04728	Alpha/beta-gliadin clone PTO-A10 (Fragment) OS=Triticum aestivum OX=4565 PE=2 SV=1	146.434	Condition 2	Condition 1	3.54e-05	46.6927	12.9111	6.06197	6.19343	1295	1138.93	1251.32	12.9428	6.13297	5.93738	1295	1111.71	1199.39	0	0	0	1	1	1
30.92_998.5373n	No	1	#4840	2	30.9236	998.537	5.7169	QQILQQQL	[6] Deamidation Q	P04728	Alpha/beta-gliadin clone PTO-A10 (Fragment) OS=Triticum aestivum OX=4565 PE=2 SV=1	2.20068	Condition 2	Condition 1	0.000228098	7.70914	530.582	597.588	615.627	1189.98	1380.63	1266.93	531.883	604.586	590.175	1189.98	1347.64	1214.35	0	0	0	1	0	1
52.10_2362.1591n	No	1	#10866	3	52.0966	2362.16	5.0879	RPSQQNPQAQGSVQPQQLPQF		P04728	Alpha/beta-gliadin clone PTO-A10 (Fragment) OS=Triticum aestivum OX=4565 PE=2 SV=1	1.64461	Condition 1	Condition 2	0.00196373	11.7267	1442.15	1502.89	1474.59	905.737	786.117	995.5	1445.69	1520.49	1413.63	905.737	767.331	954.183	0	1	0	0	0	1
57.95_707.3328n	No	1	#1365	1	57.9537	707.333	6.8218	CTIAPF	[1] Carbamidomethyl C	P04728	Alpha/beta-gliadin clone PTO-A10 (Fragment) OS=Triticum aestivum OX=4565 PE=2 SV=1	1.21577	Condition 2	Condition 1	0.000371476	3.01184	4162.29	4331.83	4416.9	5220.55	5253.08	5223.19	4172.5	4382.57	4234.3	5220.55	5127.55	5006.41	0	1	0	1	1	1
50.29_607.2981n	No	1	#383	1	50.2929	607.298	6.8892	GIFGTN		P04728	Alpha/beta-gliadin clone PTO-A10 (Fragment) OS=Triticum aestivum OX=4565 PE=2 SV=1	1.45565	Condition 2	Condition 1	0.000658761	6.52055	10486.2	10696.1	10881.7	16627.4	15437.3	14609.3	10511.9	10821.4	10431.8	16627.4	15068.4	14002.9	1	1	1	1	1	1
43.78_1849.9078n	No	2	#3404,#8312	2,3	43.7828	1849.91	5.3292	ALQTLPAMCNVYIPPY	[9] Carbamidomethyl C	P04728	Alpha/beta-gliadin clone PTO-A10 (Fragment) OS=Triticum aestivum OX=4565 PE=2 SV=1	1.10516	Condition 2	Condition 1	0.0102187	3.2282	13792.9	14713.2	14257.7	15628.9	16111.8	15520.2	13826.7	14885.5	13668.2	15628.9	15726.8	14876	0	1	0	0	1	1
50.93_3969.6878n	Yes	3	#2456,#53,#805	3,4,5	50.9317	3969.69	5.2964	ARSQMWQQSSCHVMQQQCCQQLQQIPEQSRY	[11] Carbamidomethyl C|[14] Oxidation M|[18] Carbamidomethyl C|[19] Carbamidomethyl C|[26] Hydroxyproline	P04729	Gamma-gliadin B-I OS=Triticum aestivum OX=4565 PE=2 SV=1	6.02768	Condition 1	Condition 2	2.03e-08	1.93915	166573	160237	163622	27521.7	27053.9	26787.6	166981	162114	156857	27521.7	26407.4	25675.9	0	0	0	0	2	2
35.42_1147.5631n	Yes	1	#19770	2	35.4167	1147.56	5.806	QQIPEQSRY		P04729	Gamma-gliadin B-I OS=Triticum aestivum OX=4565 PE=2 SV=1	178.949	Condition 2	Condition 1	0.00101543	134.665	0.747465	0	4.03631	243.002	259.014	354.034	0.749298	0	3.86944	243.002	252.825	339.34	0	0	0	1	1	1
60.80_2589.2710n	Yes	1	#18488	3	60.7959	2589.27	5.0251	IAVVATSAIAQMETSCISGLERPW	[16] Carbamidomethyl C	P04729	Gamma-gliadin B-I OS=Triticum aestivum OX=4565 PE=2 SV=1	2.52335	Condition 1	Condition 2	0.015743	35.732	216.227	232.126	249.887	107.328	114.948	54.4355	216.757	234.845	239.556	107.328	112.201	52.1762	0	1	0	0	1	0
37.18_971.4491n	Yes	1	#12926	2	37.1759	971.449	5.2502	YSATTSVPF		P04729	Gamma-gliadin B-I OS=Triticum aestivum OX=4565 PE=2 SV=1	1.7588	Condition 1	Condition 2	0.0243283	23.294	291.894	325.147	377.4	214.468	137.782	213.16	292.61	328.955	361.797	214.468	134.489	204.313	1	0	0	1	0	0
42.81_702.3344n	Yes	1	#7797	1	42.812	702.334	5.2995	SQQPPF		P04729	Gamma-gliadin B-I OS=Triticum aestivum OX=4565 PE=2 SV=1	2.24481	Condition 2	Condition 1	2.27e-05	5.55007	598.188	644.326	667.623	1470.85	1395.55	1421.5	599.655	651.872	640.022	1470.85	1362.2	1362.5	0	1	0	0	1	1
58.42_2430.1749n	Yes	1	#12294	3	58.4166	2430.17	5.3745	LQQQCSPVAMPQRLARSQMW	[5] Carbamidomethyl C|[10] Oxidation M	P04729	Gamma-gliadin B-I OS=Triticum aestivum OX=4565 PE=2 SV=1	4.37968	Condition 1	Condition 2	0.000695235	23.6261	667.136	620.11	512.943	106.62	171.051	133.361	668.772	627.372	491.736	106.62	166.963	127.826	0	0	0	0	1	1
65.45_1496.7491n	Yes	1	#11312	2	65.4476	1496.75	5.1271	SQQQPILSQQPPF		P04729	Gamma-gliadin B-I OS=Triticum aestivum OX=4565 PE=2 SV=1	2.91937	Condition 1	Condition 2	0.00613899	29.5245	733.013	835.399	629.267	299.818	287.283	165.69	734.81	845.183	603.251	299.818	280.418	158.813	0	0	0	1	1	0
28.95_718.3302n	Yes	1	#1072	1	28.9481	718.33	5.7608	SQQPPF	[5] Hydroxyproline	P04729	Gamma-gliadin B-I OS=Triticum aestivum OX=4565 PE=2 SV=1	1.13798	Condition 2	Condition 1	0.00542107	3.59683	9132.43	9448.7	9812.73	10989.2	10564.7	10757.8	9154.83	9559.37	9407.04	10989.2	10312.2	10311.3	1	0	0	1	0	0
58.57_1289.6612n	No	1	#11611	2	58.5709	1289.66	5.5042	SIILQEQQQGF		P04729	Gamma-gliadin B-I OS=Triticum aestivum OX=4565 PE=2 SV=1	182.503	Condition 2	Condition 1	0.00280998	101.185	4.35437	0	9.0203	816.756	841.585	782.583	4.36505	0	8.64737	816.756	821.474	750.103	0	0	0	1	1	1
52.72_1649.8073n	No	1	#19180	2	52.7243	1649.81	5.307	RTLPTMCSVNVPLY	[7] Carbamidomethyl C	P04729	Gamma-gliadin B-I OS=Triticum aestivum OX=4565 PE=2 SV=1	4.36018	Condition 1	Condition 2	0.00186847	27.3721	128.924	192.445	118.252	33.1143	41.5498	26.1622	129.24	194.699	113.363	33.1143	40.5569	25.0763	0	1	0	1	1	0
40.31_1654.8135n	No	2	#18019,#23204	2,3	40.3105	1654.81	5.3583	LQQQCSPVAMPQRL	[5] Carbamidomethyl C	P04729	Gamma-gliadin B-I OS=Triticum aestivum OX=4565 PE=2 SV=1	1.35598	Condition 2	Condition 1	0.00461355	6.58469	158.465	173.752	153.25	233.949	205.3	219.035	158.854	175.787	146.914	233.949	200.394	209.944	1	0	1	0	1	0
52.01_1610.8002n	No	1	#7981	2	52.0109	1610.8	5.4447	SQQQQPVLPQQSPF		P04729	Gamma-gliadin B-I OS=Triticum aestivum OX=4565 PE=2 SV=1	1.4449	Condition 1	Condition 2	0.00127481	6.80839	1105.1	1091.06	1180.46	840.198	747.021	749.712	1107.81	1103.84	1131.66	840.198	729.169	718.597	1	0	0	1	0	1
51.98_1132.5769n	No	1	#1421	2	51.9766	1132.58	7.4811	QQLNPCKVF	[6] Carbamidomethyl C	P04729	Gamma-gliadin B-I OS=Triticum aestivum OX=4565 PE=2 SV=1	10.3262	Condition 2	Condition 1	3.54e-07	5.23417	1533.53	1701.68	1639.93	17179.3	16122.3	17040	1537.29	1721.61	1572.13	17179.3	15737.1	16332.7	1	1	1	1	1	1
32.83_868.4412n	No	2	#6522,#3366	1,2	32.8309	868.441	6.41	QQPQQQL		P04729	Gamma-gliadin B-I OS=Triticum aestivum OX=4565 PE=2 SV=1	1.79772	Condition 2	Condition 1	6.17e-05	5.5674	3861.32	4301.95	4191.59	7383.29	7510.18	7317.1	3870.79	4352.34	4018.3	7383.29	7330.71	7013.42	2	0	0	2	2	1
44.37_1541.7529n	No	1	#1868	2	44.3657	1541.75	5.2872	QQQCSPVAMPQRL	[4] Carbamidomethyl C	P04729	Gamma-gliadin B-I OS=Triticum aestivum OX=4565 PE=2 SV=1	1.19396	Condition 2	Condition 1	0.0918636	13.5603	4203.01	4440.16	4328.84	4641.99	4887.57	5958.56	4213.32	4492.16	4149.88	4641.99	4770.78	5711.26	1	1	1	0	1	0
58.47_1865.8949n	No	1	#2210	2	58.4681	1865.89	5.4538	ERPWQQQPLPPQQSF	[5] Deamidation Q	P04729	Gamma-gliadin B-I OS=Triticum aestivum OX=4565 PE=2 SV=1	1.75423	Condition 1	Condition 2	0.000610232	9.93007	6133.36	5185.16	5188.8	3102.48	3211.19	3096.32	6148.4	5245.88	4974.28	3102.48	3134.45	2967.81	0	0	0	1	1	1
43.84_830.3959n	No	2	#2756,#1611	1,2	43.8428	830.396	7.2571	SQQQPPF		P04729	Gamma-gliadin B-I OS=Triticum aestivum OX=4565 PE=2 SV=1	1.25905	Condition 1	Condition 2	0.00123527	4.28668	9560.7	10317.9	10296.7	7785.57	8063.56	8117.66	9584.14	10438.7	9870.99	7785.57	7870.86	7780.75	2	2	0	2	2	2
52.22_1245.6749n	No	1	#757	2	52.2167	1245.67	6.0261	QQLNPCKVFL	[6] Carbamidomethyl C	P04729	Gamma-gliadin B-I OS=Triticum aestivum OX=4565 PE=2 SV=1	1.10997	Condition 2	Condition 1	0.000106608	0.974875	26113.8	26170.1	26443.2	28901.4	29036.7	29446.7	26177.8	26476.6	25350	28901.4	28342.8	28224.6	0	1	0	1	0	0
32.52_919.4243n	Yes	1	#14234	2	32.5223	919.424	5.0369	WQSQQPF		P04730	Gamma-gliadin (Fragment) OS=Triticum aestivum OX=4565 PE=2 SV=1	1.1533	Condition 2	Condition 1	0.536001	26.0379	176.893	176.392	222.621	246.252	262.448	155.492	177.327	178.458	213.417	246.252	256.177	149.039	0	0	1	0	0	1
67.01_825.4392n	Yes	1	#5225	1	67.0101	825.439	6.5758	PQQPFPL		P04730	Gamma-gliadin (Fragment) OS=Triticum aestivum OX=4565 PE=2 SV=1	1.05742	Condition 1	Condition 2	0.275434	7.21558	1238.73	1403.58	1244.75	1255.54	1222.02	1198.43	1241.76	1420.02	1193.28	1255.54	1192.81	1148.69	1	1	1	1	0	1
38.91_733.3405n	Yes	1	#998	1	38.9112	733.34	7.032	QSQQPF		P04730	Gamma-gliadin (Fragment) OS=Triticum aestivum OX=4565 PE=2 SV=1	1.11038	Condition 2	Condition 1	0.0160505	3.77844	6749.44	7114.82	7267.36	7738.4	7682.09	8043.69	6765.99	7198.15	6966.9	7738.4	7498.51	7709.85	1	1	1	1	1	1
48.47_1670.8355n	Yes	1	#1616	2	48.4718	1670.84	5.99	PQQPFPLQPQQSFL	[4] Hydroxyproline|[10] Deamidation Q	P04730	Gamma-gliadin (Fragment) OS=Triticum aestivum OX=4565 PE=2 SV=1	1.37831	Condition 2	Condition 1	0.000549211	5.29253	12086.6	10926.7	11215.5	15422.4	15773.5	15981.9	12116.3	11054.6	10751.8	15422.4	15396.6	15318.6	0	1	0	0	0	1
32.83_1556.7358n	Yes	1	#1099	2	32.8309	1556.74	5.4875	PQQPFPLQPQQSF	[9] Hydroxyproline	P04730	Gamma-gliadin (Fragment) OS=Triticum aestivum OX=4565 PE=2 SV=1	5.10208	Condition 1	Condition 2	5.98e-06	7.01105	32395	33891.2	37123.4	6826	6349.42	7092.68	32474.5	34288.1	35588.6	6826	6197.69	6798.31	1	1	0	0	0	0
61.48_1053.5259n	No	1	#21550	2	61.4816	1053.53	5.4481	GQQPQQQQL		P04730	Gamma-gliadin (Fragment) OS=Triticum aestivum OX=4565 PE=2 SV=1	2.42881	Condition 1	Condition 2	0.27571	98.8343	45.1982	101.877	118.485	0	72.0265	37.3112	45.3091	103.071	113.587	0	70.3053	35.7626	1	1	0	0	0	0
42.76_2778.3114n	No	1	#5862	3	42.7606	2778.31	6.6709	GQCVSQPQQQSQQQLGQQPQQQQL	[3] Carbamidomethyl C	P04730	Gamma-gliadin (Fragment) OS=Triticum aestivum OX=4565 PE=2 SV=1	126.956	Condition 2	Condition 1	0.0163512	88.1445	48.2818	0	38.7569	3599.46	3932.7	3517.89	48.4002	0	37.1545	3599.46	3838.72	3371.88	0	0	0	1	1	1
32.42_1053.5224n	No	1	#10237	2	32.4194	1053.52	6.3291	GQQPQQQQL		P04730	Gamma-gliadin (Fragment) OS=Triticum aestivum OX=4565 PE=2 SV=1	14.4311	Condition 2	Condition 1	0.000314265	43.2947	134.387	115.008	247.852	2413.93	2439.62	2322.28	134.716	116.355	237.605	2413.93	2381.32	2225.89	0	0	0	1	1	0
40.31_1654.8135n	No	2	#18019,#23204	2,3	40.3105	1654.81	5.3583	LQQQCSPVAMPQRL	[5] Carbamidomethyl C	P04730	Gamma-gliadin (Fragment) OS=Triticum aestivum OX=4565 PE=2 SV=1	1.35598	Condition 2	Condition 1	0.00461355	6.58469	158.465	173.752	153.25	233.949	205.3	219.035	158.854	175.787	146.914	233.949	200.394	209.944	1	0	1	0	1	0
51.30_1053.5152n	No	1	#11869	2	51.2974	1053.52	5.9594	GQQPQQQQL		P04730	Gamma-gliadin (Fragment) OS=Triticum aestivum OX=4565 PE=2 SV=1	1.02404	Condition 1	Condition 2	0.881839	19.6911	199.523	219.279	285.855	221.72	188.521	277.875	200.013	221.848	274.037	221.72	184.016	266.342	0	0	1	0	0	1
36.83_1742.8022n	No	1	#3735	2	36.833	1742.8	7.3901	GQCVSQPQQQSQQQL	[3] Carbamidomethyl C	P04730	Gamma-gliadin (Fragment) OS=Triticum aestivum OX=4565 PE=2 SV=1	10.485	Condition 2	Condition 1	4.94e-06	10.9553	419.589	336.707	386.867	3966.28	3801.61	4218.22	420.618	340.65	370.873	3966.28	3710.76	4043.15	0	0	0	1	1	1
49.44_3282.5245n	No	1	#15495	4	49.4425	3282.52	5.4413	GQCVSQPQQQSQQQLGQQPQQQQLAQGTF	[3] Carbamidomethyl C	P04730	Gamma-gliadin (Fragment) OS=Triticum aestivum OX=4565 PE=2 SV=1	11.7089	Condition 1	Condition 2	0.000759055	43.3056	519.351	617.962	472.751	66.5461	26.9766	43.9854	520.625	625.2	453.206	66.5461	26.3319	42.1599	1	1	0	0	0	0
42.17_704.3688n	No	1	#5619	1	42.1666	704.369	5.0335	ARSQML		P04730	Gamma-gliadin (Fragment) OS=Triticum aestivum OX=4565 PE=2 SV=1	1.24367	Condition 2	Condition 1	0.00390763	5.25972	538.652	505.579	507.467	619.305	681.971	628.527	539.973	511.501	486.487	619.305	665.674	602.441	0	0	0	1	1	0
56.76_1743.7816n	No	1	#8888	2	56.7604	1743.78	5.4703	GQCVSQPQQQSQQQL	[3] Carbamidomethyl C|[9] Deamidation Q	P04730	Gamma-gliadin (Fragment) OS=Triticum aestivum OX=4565 PE=2 SV=1	3.52039	Condition 1	Condition 2	7.32e-07	3.86458	1030.96	1113.54	1080.06	307.991	300.987	306.99	1033.49	1126.59	1035.41	307.991	293.794	294.249	1	1	0	0	0	0
46.86_907.4772n	No	2	#7473,#2666	1,2	46.8581	907.477	6.6435	RTTTSVPF		P04730	Gamma-gliadin (Fragment) OS=Triticum aestivum OX=4565 PE=2 SV=1	2.87302	Condition 2	Condition 1	1.14e-05	5.20525	1285.98	1361.45	1227.34	3623.85	3607.56	3900.87	1289.13	1377.39	1176.59	3623.85	3521.35	3738.97	1	2	2	2	2	2
51.98_1132.5769n	No	1	#1421	2	51.9766	1132.58	7.4811	QQLNPCKVF	[6] Carbamidomethyl C	P04730	Gamma-gliadin (Fragment) OS=Triticum aestivum OX=4565 PE=2 SV=1	10.3262	Condition 2	Condition 1	3.54e-07	5.23417	1533.53	1701.68	1639.93	17179.3	16122.3	17040	1537.29	1721.61	1572.13	17179.3	15737.1	16332.7	1	1	1	1	1	1
48.30_1046.5927n	No	1	#1587	2	48.3004	1046.59	7.2758	LQPHQIAQL		P04730	Gamma-gliadin (Fragment) OS=Triticum aestivum OX=4565 PE=2 SV=1	4.13715	Condition 2	Condition 1	1.32e-05	8.55766	1833.09	1891.29	2001.53	8675.71	7538.52	7474.68	1837.58	1913.44	1918.78	8675.71	7358.37	7164.46	1	1	1	1	1	1
59.44_1907.9833n	No	1	#5330	2	59.4384	1907.98	5.6674	LQPHQIAQLEVMTSIAL	[5] Deamidation Q|[12] Oxidation M	P04730	Gamma-gliadin (Fragment) OS=Triticum aestivum OX=4565 PE=2 SV=1	1.06366	Condition 2	Condition 1	0.0362573	3.30435	2162.59	2038.91	2157.71	2236.46	2278.21	2249.39	2167.89	2062.78	2068.51	2236.46	2223.77	2156.03	0	0	0	0	1	1
71.54_1668.8590n	No	1	#6880	2	71.5414	1668.86	5.3193	RTTTSVPFGVGTGVGAY		P04730	Gamma-gliadin (Fragment) OS=Triticum aestivum OX=4565 PE=2 SV=1	6.74453	Condition 1	Condition 2	0.00251522	54.7328	3012.59	3376.87	2786.81	739.873	321.02	299.656	3019.97	3416.42	2671.6	739.873	313.349	287.219	0	1	1	0	0	0
63.35_1559.7233n	No	1	#6082	2	63.3531	1559.72	5.7537	GQQPQQQQLAQGTF	[8] Deamidation Q|[11] Deamidation Q	P04730	Gamma-gliadin (Fragment) OS=Triticum aestivum OX=4565 PE=2 SV=1	1.34602	Condition 1	Condition 2	0.00010166	3.22128	3540.74	3740.37	3537.63	2681.59	2702.44	2653.53	3549.42	3784.18	3391.38	2681.59	2637.86	2543.4	0	0	0	0	1	1
56.12_1086.5364n	No	1	#2114	2	56.1157	1086.54	6.5523	YRTTTSVPF	[8] Hydroxyproline	P04730	Gamma-gliadin (Fragment) OS=Triticum aestivum OX=4565 PE=2 SV=1	1.09696	Condition 1	Condition 2	0.0215106	4.25025	3654.63	3530.08	3357.23	3183.71	3192.8	3233.67	3663.6	3571.42	3218.43	3183.71	3116.5	3099.47	0	0	1	0	1	0
31.47_933.5079n	No	1	#1490	2	31.4657	933.508	5.993	QPHQIAQL		P04730	Gamma-gliadin (Fragment) OS=Triticum aestivum OX=4565 PE=2 SV=1	1.1173	Condition 1	Condition 2	0.016643	4.18749	4152.71	4487.04	4447.46	3805.14	3927.09	3980.99	4162.89	4539.59	4263.59	3805.14	3833.25	3815.76	1	1	1	1	1	1
44.37_1541.7529n	No	1	#1868	2	44.3657	1541.75	5.2872	QQQCSPVAMPQRL	[4] Carbamidomethyl C	P04730	Gamma-gliadin (Fragment) OS=Triticum aestivum OX=4565 PE=2 SV=1	1.19396	Condition 2	Condition 1	0.0918636	13.5603	4203.01	4440.16	4328.84	4641.99	4887.57	5958.56	4213.32	4492.16	4149.88	4641.99	4770.78	5711.26	1	1	1	0	1	0
49.95_1086.5321n	No	1	#453	2	49.9501	1086.53	6.0578	YRTTTSVPF	[8] Hydroxyproline	P04730	Gamma-gliadin (Fragment) OS=Triticum aestivum OX=4565 PE=2 SV=1	1.6239	Condition 1	Condition 2	0.000279078	5.54655	10597.4	10650.7	11677.4	6424.46	6877.16	6973.98	10623.4	10775.4	11194.6	6424.46	6712.81	6684.53	1	1	0	0	0	0
29.94_1670.8154n	No	1	#752	2	29.9359	1670.82	5.3887	LQQQCSPVAMPQRL	[5] Carbamidomethyl C|[10] Oxidation M	P04730	Gamma-gliadin (Fragment) OS=Triticum aestivum OX=4565 PE=2 SV=1	1.27532	Condition 2	Condition 1	0.00704412	6.05929	18076.8	18672.5	20302.7	25439.5	24570.7	22749.3	18121.1	18891.2	19463.3	25439.5	23983.5	21805.1	1	0	1	0	0	0
46.02_2359.1468n	No	1	#2080	3	46.0158	2359.15	6.2732	LQQQCSPVAMPQRLARSQML	[5] Carbamidomethyl C|[10] Oxidation M|[12] Deamidation Q|[18] Deamidation Q	P04730	Gamma-gliadin (Fragment) OS=Triticum aestivum OX=4565 PE=2 SV=1	1.04025	Condition 2	Condition 1	0.0942674	2.84545	18839.4	18064.6	19081	19455	19641.3	19142.2	18885.6	18276.2	18292.1	19455	19172	18347.7	0	0	0	1	1	0
52.22_1245.6749n	No	1	#757	2	52.2167	1245.67	6.0261	QQLNPCKVFL	[6] Carbamidomethyl C	P04730	Gamma-gliadin (Fragment) OS=Triticum aestivum OX=4565 PE=2 SV=1	1.10997	Condition 2	Condition 1	0.000106608	0.974875	26113.8	26170.1	26443.2	28901.4	29036.7	29446.7	26177.8	26476.6	25350	28901.4	28342.8	28224.6	0	1	0	1	0	0
32.83_1556.7592n	No	1	#520	3	32.8309	1556.76	5.6994	PQQPFPLQPQQSF	[9] Hydroxyproline	P04730	Gamma-gliadin (Fragment) OS=Triticum aestivum OX=4565 PE=2 SV=1	2.72718	Condition 1	Condition 2	2.74e-06	3.8935	151792	152812	158506	54615	56224.1	58973.3	152164	154602	151953	54615	54880.6	56525.7	1	1	1	0	0	0
49.14_901.4876n	Yes	2	#1502,#15654	1,2	49.1425	901.488	5.966	ASIVASIGGQ		P06659	Gamma-gliadin B OS=Triticum aestivum OX=4565 PE=3 SV=1	2.31774	Condition 2	Condition 1	6.6e-06	4.23135	2188.98	2376.74	2326.57	5362.04	5203.97	5408.52	2194.35	2404.57	2230.39	5362.04	5079.61	5184.05	1	1	1	2	2	2
35.25_1681.7828n	Yes	2	#732,#6023	2,3	35.2522	1681.78	5.2303	QTLPTMCNVYVPPY	[7] Carbamidomethyl C	P06659	Gamma-gliadin B OS=Triticum aestivum OX=4565 PE=3 SV=1	1.05694	Condition 2	Condition 1	0.446326	10.2144	15983.8	16058	15637.6	14825.6	17622.8	17945.8	16023	16246	14991.1	14825.6	17201.7	17201	0	1	1	1	1	1
27.84_891.4359n	Yes	1	#13431	2	27.8405	891.436	5.4863	NPCKNFL	[3] Carbamidomethyl C	P06659	Gamma-gliadin B OS=Triticum aestivum OX=4565 PE=3 SV=1	4.29167	Condition 2	Condition 1	0.000763495	24.5371	69.2122	45.6126	74.8587	254.399	264.815	294.845	69.382	46.1469	71.7638	254.399	258.487	282.608	0	0	0	0	1	1
37.14_1225.5408n	Yes	1	#11921	2	37.1416	1225.54	5.3758	QTLPTMCNVY	[7] Carbamidomethyl C	P06659	Gamma-gliadin B OS=Triticum aestivum OX=4565 PE=3 SV=1	1.33358	Condition 1	Condition 2	0.017752	11.2855	482.608	499.602	544.521	383.299	337.726	423.809	483.792	505.453	522.009	383.299	329.655	406.22	1	0	1	0	0	1
30.48_891.4315n	Yes	1	#11453	2	30.4779	891.432	5.8866	NPCKNFL	[3] Carbamidomethyl C	P06659	Gamma-gliadin B OS=Triticum aestivum OX=4565 PE=3 SV=1	14.983	Condition 1	Condition 2	0.00447052	61.4372	583.69	466.018	502.861	42.6764	50.4895	10.4557	585.121	471.476	482.071	42.6764	49.283	10.0218	1	1	0	0	0	0
55.59_2306.1839n	Yes	1	#13377	2	55.5908	2306.18	5.3498	VPPYCSTIRAPFASIVASIGGQ	[2] Hydroxyproline|[5] Carbamidomethyl C	P06659	Gamma-gliadin B OS=Triticum aestivum OX=4565 PE=3 SV=1	1.31988	Condition 1	Condition 2	0.044056	14.7014	705.955	548.797	555.98	451.357	496.818	423.718	707.686	555.224	532.995	451.357	484.946	406.133	0	0	0	1	1	0
38.50_1406.7042n	Yes	1	#8281	2	38.4998	1406.7	5.12	VPPYCSTIRAPF	[5] Carbamidomethyl C	P06659	Gamma-gliadin B OS=Triticum aestivum OX=4565 PE=3 SV=1	1.59921	Condition 2	Condition 1	0.000957337	6.8815	784.792	900.448	838.21	1252.63	1366.13	1416.76	786.717	910.994	803.556	1252.63	1333.48	1357.96	1	0	1	1	0	0
64.60_2460.1463n	Yes	1	#12531	3	64.5974	2460.15	5.0582	SIILPPSDCQVMRQQCCQQL	[9] Carbamidomethyl C|[16] Carbamidomethyl C|[17] Carbamidomethyl C	P06659	Gamma-gliadin B OS=Triticum aestivum OX=4565 PE=3 SV=1	1.09995	Condition 2	Condition 1	0.218247	10.8667	993.368	1017.18	828.362	1000.43	1055.45	1066.79	995.804	1029.09	794.115	1000.43	1030.23	1022.51	1	1	1	1	0	1
52.29_1184.6429n	Yes	1	#7993	2	52.2852	1184.64	5.2852	LLQQCKPVSL	[5] Carbamidomethyl C	P06659	Gamma-gliadin B OS=Triticum aestivum OX=4565 PE=3 SV=1	1.56901	Condition 1	Condition 2	0.000207261	5.0319	1007.26	924.869	923.724	622.89	613.83	583.443	1009.73	935.701	885.534	622.89	599.161	559.229	0	1	1	0	1	0
51.30_1184.6180n	Yes	1	#2483	2	51.2974	1184.62	6.3298	SQQQQVGQGIL		P06659	Gamma-gliadin B OS=Triticum aestivum OX=4565 PE=3 SV=1	1.03287	Condition 1	Condition 2	0.252326	4.02263	3427.68	3497.62	3701.92	3448.03	3452.81	3388.14	3436.09	3538.58	3548.87	3448.03	3370.3	3247.52	1	1	1	1	1	1
42.76_865.4494n	Yes	1	#1609	2	42.7606	865.449	5.9786	LQPHQPF		P06659	Gamma-gliadin B OS=Triticum aestivum OX=4565 PE=3 SV=1	1.09355	Condition 2	Condition 1	0.0116619	2.85251	6314.23	6618.8	6652.17	7012.33	7106.71	7298.33	6329.72	6696.32	6377.15	7012.33	6936.88	6995.43	1	1	1	1	1	1
55.63_2306.1826n	Yes	1	#1404	3	55.6251	2306.18	5.3498	VPPYCSTIRAPFASIVASIGGQ	[2] Hydroxyproline|[5] Carbamidomethyl C	P06659	Gamma-gliadin B OS=Triticum aestivum OX=4565 PE=3 SV=1	1.03836	Condition 1	Condition 2	0.644147	11.7351	11804.2	9860.46	9551.78	9872.41	9948.38	10242.2	11833.1	9975.95	9156.88	9872.41	9710.65	9817.15	0	0	0	1	1	0
51.04_1834.9258n	Yes	1	#4772	2	51.0402	1834.93	5.5659	CSTIRAPFASIVASIGGQ	[1] Carbamidomethyl C|[18] Deamidation Q	P06659	Gamma-gliadin B OS=Triticum aestivum OX=4565 PE=3 SV=1	1.1444	Condition 2	Condition 1	0.00674969	3.42418	14683.2	14319.2	13717.7	16858.5	16031.7	15998.9	14719.2	14487	13150.6	16858.5	15648.6	15334.9	0	1	1	1	0	0
69.97_2290.1764n	Yes	1	#1067	2	69.9713	2290.18	5.5227	VPPYCSTIRAPFASIVASIGGQ	[5] Carbamidomethyl C	P06659	Gamma-gliadin B OS=Triticum aestivum OX=4565 PE=3 SV=1	1.82366	Condition 1	Condition 2	0.000549389	7.88744	22746.3	24235	20691.6	12769.3	12891.1	11448	22802.1	24518.8	19836.1	12769.3	12583	10972.9	0	0	0	1	1	1
69.97_2290.1805n	Yes	1	#304	3	69.9713	2290.18	5.5227	VPPYCSTIRAPFASIVASIGGQ	[5] Carbamidomethyl C	P06659	Gamma-gliadin B OS=Triticum aestivum OX=4565 PE=3 SV=1	1.26413	Condition 1	Condition 2	0.00338416	5.46004	37803.2	39459.5	35382.9	30105.5	30464.1	28539.5	37895.9	39921.6	33920.1	30105.5	29736.1	27355	1	1	1	1	1	1
47.78_796.4454n	No	2	#4615,#7996	1,2	47.7775	796.445	6.5566	AQIPQQL		P06659	Gamma-gliadin B OS=Triticum aestivum OX=4565 PE=3 SV=1	5.02304	Condition 2	Condition 1	3.98e-08	1.80515	903.419	926.777	896.159	4623.97	4470.74	4599.88	905.635	937.631	859.109	4623.97	4363.9	4408.97	1	1	2	2	2	2
65.48_797.4290n	No	2	#2226,#14640	1,2	65.4819	797.429	5.3678	AQIPQQL	[2] Deamidation Q	P06659	Gamma-gliadin B OS=Triticum aestivum OX=4565 PE=3 SV=1	1.05427	Condition 2	Condition 1	0.124436	4.56745	2296.14	2252.65	2278.53	2512.55	2391.52	2293.79	2301.77	2279.03	2184.33	2512.55	2334.37	2198.59	1	1	1	1	1	0
54.14_1603.8682n	No	1	#2041	2	54.1409	1603.87	7.2621	VQGQGIIQPQQPAQL		P06659	Gamma-gliadin B OS=Triticum aestivum OX=4565 PE=3 SV=1	1.41391	Condition 2	Condition 1	0.00180503	8.0303	4394.52	4450.73	5065.74	6616.79	6388.37	6663.66	4405.3	4502.85	4856.31	6616.79	6235.71	6387.1	1	1	1	1	1	1
57.51_3906.8900n	Yes	2	#6571,#3190	3,4	57.5147	3906.89	6.5593	SQQPQQTFPQPQQTFPHQPQQQVPQPQQPQQPF		P08453	Gamma-gliadin OS=Triticum aestivum OX=4565 PE=3 SV=1	4.3108	Condition 2	Condition 1	1.96e-05	10.4464	3581.28	3578.73	2969.1	14508.2	14654.6	14501.7	3590.06	3620.64	2846.35	14508.2	14304.4	13899.9	2	2	2	2	2	2
46.82_1356.7712n	Yes	2	#19116,#111	1,2	46.8152	1356.77	5.6742	LQQSKPASLVSSL		P08453	Gamma-gliadin OS=Triticum aestivum OX=4565 PE=3 SV=1	1.05454	Condition 1	Condition 2	0.181777	5.39871	41632.5	45226.3	46169.1	42490.7	42133.8	41523.4	41734.6	45756	44260.4	42490.7	41127	39800	2	2	1	2	1	0
49.76_871.4757n	Yes	1	#18496	2	49.7615	871.476	7.5778	ASIVAGIGGQ		P08453	Gamma-gliadin OS=Triticum aestivum OX=4565 PE=3 SV=1	1.46612	Condition 2	Condition 1	0.108253	27.7653	195.448	142.371	177.145	218.346	204.688	331.966	195.927	144.039	169.821	218.346	199.796	318.188	0	0	0	1	1	1
59.37_1053.5691n	Yes	1	#10908	1	59.3698	1053.57	5.1171	IQPSLQQQL		P08453	Gamma-gliadin OS=Triticum aestivum OX=4565 PE=3 SV=1	2.06306	Condition 1	Condition 2	0.00210937	12.7743	417.3	485.741	539.908	214.406	218.354	266.663	418.323	491.43	517.586	214.406	213.136	255.596	1	1	1	0	1	0
44.43_1491.7675n	Yes	1	#15516	2	44.4342	1491.77	5.3984	LPLSQHEQVGQGSL		P08453	Gamma-gliadin OS=Triticum aestivum OX=4565 PE=3 SV=1	2.36587	Condition 1	Condition 2	0.000102723	9.13453	718.038	683.827	687.002	264.725	300.946	317.247	719.799	691.836	658.599	264.725	293.754	304.08	1	1	1	1	0	0
61.97_687.3942n	Yes	1	#7339	1	61.9718	687.394	5.5711	EAIRSL		P08453	Gamma-gliadin OS=Triticum aestivum OX=4565 PE=3 SV=1	1.1196	Condition 1	Condition 2	0.146969	9.01915	905.32	954.64	1076.82	818.963	880.402	923.699	907.54	965.821	1032.3	818.963	859.364	885.362	1	1	1	1	1	1
62.35_1424.6620n	Yes	1	#7532	2	62.3489	1424.66	5.6316	VLQTLPSMCNVY	[9] Carbamidomethyl C|[10] Deamidation N	P08453	Gamma-gliadin OS=Triticum aestivum OX=4565 PE=3 SV=1	1.13565	Condition 2	Condition 1	0.0463522	6.97198	914.109	981.033	853.333	1078.08	1005.28	1037.95	916.351	992.522	818.054	1078.08	981.262	994.869	0	1	0	0	0	1
39.34_857.4621n	Yes	1	#3678	2	39.3398	857.462	5.6937	QQSKPASL		P08453	Gamma-gliadin OS=Triticum aestivum OX=4565 PE=3 SV=1	2.12153	Condition 2	Condition 1	0.00464132	20.5583	1048.26	998.194	1069.74	1683.68	2414.36	2513.06	1050.83	1009.88	1025.52	1683.68	2356.67	2408.76	0	0	1	1	0	0
50.45_2754.4296n	Yes	1	#9445	4	50.4472	2754.43	5.3047	SQHEQVGQGSLVQGQGIIQPQQPAQL		P08453	Gamma-gliadin OS=Triticum aestivum OX=4565 PE=3 SV=1	2.42185	Condition 1	Condition 2	0.00223507	15.3605	1205.19	1203.5	910.034	402.096	432.78	535.45	1208.15	1217.6	872.411	402.096	422.438	513.227	1	1	1	0	0	0
51.93_1354.7046n	Yes	1	#3543	2	51.9252	1354.7	6.2577	QQQLNPCKNIL	[7] Carbamidomethyl C	P08453	Gamma-gliadin OS=Triticum aestivum OX=4565 PE=3 SV=1	1.79713	Condition 2	Condition 1	0.000465582	7.50946	1653.68	1894.83	1883.07	3219.3	3080.34	3461.64	1657.74	1917.03	1805.22	3219.3	3006.73	3317.97	1	1	1	1	1	1
49.76_871.4770n	Yes	1	#247	1	49.7615	871.477	7.5778	ASIVAGIGGQ		P08453	Gamma-gliadin OS=Triticum aestivum OX=4565 PE=3 SV=1	1.36981	Condition 2	Condition 1	0.000279583	4.47732	17637.1	17882.8	17976.3	25650	23543.9	24085.6	17680.3	18092.2	17233.1	25650	22981.3	23086	1	1	1	1	1	1
47.78_796.4454n	No	2	#4615,#7996	1,2	47.7775	796.445	6.5566	AQIPQQL		P08453	Gamma-gliadin OS=Triticum aestivum OX=4565 PE=3 SV=1	5.02304	Condition 2	Condition 1	3.98e-08	1.80515	903.419	926.777	896.159	4623.97	4470.74	4599.88	905.635	937.631	859.109	4623.97	4363.9	4408.97	1	1	2	2	2	2
65.48_797.4290n	No	2	#2226,#14640	1,2	65.4819	797.429	5.3678	AQIPQQL	[2] Deamidation Q	P08453	Gamma-gliadin OS=Triticum aestivum OX=4565 PE=3 SV=1	1.05427	Condition 2	Condition 1	0.124436	4.56745	2296.14	2252.65	2278.53	2512.55	2391.52	2293.79	2301.77	2279.03	2184.33	2512.55	2334.37	2198.59	1	1	1	1	1	0
54.14_1603.8682n	No	1	#2041	2	54.1409	1603.87	7.2621	VQGQGIIQPQQPAQL		P08453	Gamma-gliadin OS=Triticum aestivum OX=4565 PE=3 SV=1	1.41391	Condition 2	Condition 1	0.00180503	8.0303	4394.52	4450.73	5065.74	6616.79	6388.37	6663.66	4405.3	4502.85	4856.31	6616.79	6235.71	6387.1	1	1	1	1	1	1
41.82_1984.9352n	Yes	2	#4225,#11447	2,3	41.8152	1984.94	6.9839	GQGQQIGQVQQPGQGQQGY		P08488	Glutenin_ high molecular weight subunit 12 OS=Triticum aestivum OX=4565 PE=3 SV=1	1.41798	Condition 2	Condition 1	0.000411036	5.2325	2302.19	2521.1	2527.28	3538.34	3417.99	3466.66	2307.84	2550.62	2422.79	3538.34	3336.31	3322.78	2	2	1	2	2	2
33.23_2581.1935n	Yes	1	#11255	4	33.2252	2581.19	5.1693	GQGQQPGQWQQSGQGQQGHYPTSL		P08488	Glutenin_ high molecular weight subunit 12 OS=Triticum aestivum OX=4565 PE=3 SV=1	10.5108	Condition 2	Condition 1	0.000402153	34.6457	109.05	161.415	81.4061	1020.21	1298.57	1379.65	109.317	163.305	78.0405	1020.21	1267.54	1322.39	0	1	0	1	1	0
56.27_2546.2128n	Yes	1	#6801	3	56.27	2546.21	6.3976	GQGQQIGQVQQPGQGQQGYYPTSL		P08488	Glutenin_ high molecular weight subunit 12 OS=Triticum aestivum OX=4565 PE=3 SV=1	9.76882	Condition 2	Condition 1	0.000179237	27.9122	178.876	319.562	261.336	2572.71	2495.07	2354.32	179.315	323.305	250.532	2572.71	2435.45	2256.6	0	1	1	1	1	1
42.64_1340.6209n	Yes	1	#9274	2	42.6406	1340.62	5.378	YPSVTSPRQGSY		P08488	Glutenin_ high molecular weight subunit 12 OS=Triticum aestivum OX=4565 PE=3 SV=1	1.53096	Condition 1	Condition 2	0.0160667	15.0112	425.769	542.88	571.043	312.731	371.339	321.636	426.813	549.238	547.435	312.731	362.465	308.287	0	0	0	0	1	1
55.74_1898.8856n	Yes	1	#12458	2	55.7386	1898.89	6.3664	YPTSPQQLGQGQQPGQW		P08488	Glutenin_ high molecular weight subunit 12 OS=Triticum aestivum OX=4565 PE=3 SV=1	1.43312	Condition 2	Condition 1	0.00382044	8.39696	708.433	837.453	764.872	1166.63	1111.86	1033.1	710.171	847.261	733.25	1166.63	1085.29	990.224	1	1	0	1	1	1
37.36_1700.7896n	Yes	1	#2946	2	37.3645	1700.79	7.1074	QQPGQGQQIGQGQQGY		P08488	Glutenin_ high molecular weight subunit 12 OS=Triticum aestivum OX=4565 PE=3 SV=1	3.51015	Condition 2	Condition 1	1.83e-05	9.16567	2434.33	2114.78	2060.65	7582.12	7782.01	7837.11	2440.3	2139.54	1975.46	7582.12	7596.04	7511.85	1	1	1	1	1	1
43.10_1439.6835n	Yes	1	#943	2	43.1035	1439.68	6.8539	QQPGQQGHYPTSL		P08488	Glutenin_ high molecular weight subunit 12 OS=Triticum aestivum OX=4565 PE=3 SV=1	2.32491	Condition 2	Condition 1	5.55e-08	1.09217	6507.24	6478.94	6595.76	15052.3	15363.9	15110.1	6523.2	6554.82	6323.07	15052.3	14996.8	14483	1	1	1	1	1	1
40.12_2823.2727n	No	1	#14114	3	40.1219	2823.27	6.2071	QQSGQGQQGHYPTSLQQPGQGQQGHY		P08488	Glutenin_ high molecular weight subunit 12 OS=Triticum aestivum OX=4565 PE=3 SV=1	72.9427	Condition 2	Condition 1	0.0123499	86.8251	14.9479	16.2396	0	946.998	763.365	564.537	14.9846	16.4297	0	946.998	745.123	541.107	0	0	0	1	0	1
41.64_1976.9163n	No	1	#21804	2	41.6352	1976.92	5.6886	TTAEGEASRQLQCEREL	[13] Carbamidomethyl C	P08488	Glutenin_ high molecular weight subunit 12 OS=Triticum aestivum OX=4565 PE=3 SV=1	1.39497	Condition 2	Condition 1	0.341994	84.1327	19.1971	50.7057	126.229	73.3668	99.1191	101.112	19.2442	51.2996	121.011	73.3668	96.7505	96.9158	1	1	1	1	1	1
47.84_1212.5446n	No	1	#19068	2	47.8375	1212.54	5.4134	WGTSSQTVQGY		P08488	Glutenin_ high molecular weight subunit 12 OS=Triticum aestivum OX=4565 PE=3 SV=1	5.58561	Condition 2	Condition 1	0.00569077	48.379	36.1476	51.4805	17.5944	198.716	229.994	159.022	36.2362	52.0834	16.867	198.716	224.497	152.422	0	0	0	1	0	1
43.85_2277.0424n	No	1	#15849	2	43.8514	2277.04	5.4986	QQPGQGQQQGQGQQGYYPTSL		P08488	Glutenin_ high molecular weight subunit 12 OS=Triticum aestivum OX=4565 PE=3 SV=1	1.65331	Condition 2	Condition 1	0.142282	34.6488	123.203	257.052	202.477	392.089	354.07	217.278	123.505	260.062	194.106	392.089	345.609	208.26	0	1	0	0	1	1
36.29_2069.9578n	No	2	#9474,#5545	2,3	36.291	2069.96	6.217	YPGQASPQQPGQGQQPGKW	[10] Hydroxyproline|[16] Hydroxyproline	P08488	Glutenin_ high molecular weight subunit 12 OS=Triticum aestivum OX=4565 PE=3 SV=1	23.4626	Condition 2	Condition 1	1.32e-06	11.1213	148.317	175.643	184.468	3846.33	3988.33	4094.41	148.681	177.7	176.842	3846.33	3893.02	3924.48	0	0	0	2	2	2
28.79_1715.7575n	No	1	#17908	2	28.7938	1715.76	5.487	QQPGQGQQQGQGQQGY		P08488	Glutenin_ high molecular weight subunit 12 OS=Triticum aestivum OX=4565 PE=3 SV=1	3.22157	Condition 2	Condition 1	0.00572694	26.5378	256.287	159.182	270.871	785.895	873.434	551.765	256.916	161.047	259.673	785.895	852.562	528.865	0	0	0	1	1	0
33.17_962.4579n	No	1	#10267	2	33.1737	962.458	5.1396	QQLQQGIF	[4] Deamidation Q|[5] Deamidation Q	P08488	Glutenin_ high molecular weight subunit 12 OS=Triticum aestivum OX=4565 PE=3 SV=1	1.16443	Condition 2	Condition 1	0.103655	10.5207	412.454	459.958	452.522	452.711	535.798	554.29	413.466	465.345	433.814	452.711	522.994	531.285	1	0	1	0	0	0
53.48_1161.5555n	No	1	#10496	2	53.4786	1161.56	5.345	TTAEGEASRQL		P08488	Glutenin_ high molecular weight subunit 12 OS=Triticum aestivum OX=4565 PE=3 SV=1	1.49981	Condition 1	Condition 2	0.0793502	30.1149	476.611	580.054	508.752	336.688	249.205	457.849	477.78	586.848	487.719	336.688	243.25	438.847	1	1	1	0	0	1
58.42_1785.8363n	No	1	#15246	2	58.4166	1785.84	5.4856	QQGIFWGTSSQTVQGY		P08488	Glutenin_ high molecular weight subunit 12 OS=Triticum aestivum OX=4565 PE=3 SV=1	4.9612	Condition 1	Condition 2	5.5e-05	14.0907	765.022	664.014	576.768	135.175	142.412	126.711	766.898	671.791	552.923	135.175	139.009	121.452	0	1	1	0	0	1
57.24_2179.0980n	No	1	#7505	2	57.2404	2179.1	5.4391	RDVSAKCRSVAVSQVARQY	[7] Carbamidomethyl C	P08488	Glutenin_ high molecular weight subunit 12 OS=Triticum aestivum OX=4565 PE=3 SV=1	1.63851	Condition 2	Condition 1	0.00260688	10.1315	797.439	763.014	687.702	1345.73	1240.05	1097.83	799.394	771.95	659.271	1345.73	1210.42	1052.26	1	1	1	1	0	0
43.83_2277.0391n	No	1	#7062	3	43.8342	2277.04	5.5542	YPTSLQQPGQGQQQGQGQQGY		P08488	Glutenin_ high molecular weight subunit 12 OS=Triticum aestivum OX=4565 PE=3 SV=1	1.41358	Condition 2	Condition 1	0.00799784	10.3225	1063.19	879.034	911.965	1374.44	1419.1	1241.1	1065.8	889.33	874.262	1374.44	1385.19	1189.59	1	1	0	1	1	1
37.30_1780.7928n	No	1	#5967	3	37.2959	1780.79	5.292	QEPGQGQQWYYPTSL		P08488	Glutenin_ high molecular weight subunit 12 OS=Triticum aestivum OX=4565 PE=3 SV=1	3.02354	Condition 1	Condition 2	0.00221878	25.4143	1586.46	1509.98	1489.44	358.066	565.55	593.11	1590.35	1527.66	1427.87	358.066	552.035	568.494	0	1	0	1	1	1
37.28_1780.7939n	No	1	#6368	2	37.2788	1780.79	5.292	QEPGQGQQWYYPTSL		P08488	Glutenin_ high molecular weight subunit 12 OS=Triticum aestivum OX=4565 PE=3 SV=1	3.93932	Condition 1	Condition 2	0.000343279	19.9693	1625.64	1644.48	1639.75	322.648	482.423	441.303	1629.62	1663.74	1571.96	322.648	470.895	422.988	0	1	0	1	0	1
52.06_742.3548n	No	1	#1213	1	52.0624	742.355	6.9675	YYPTSL		P08488	Glutenin_ high molecular weight subunit 12 OS=Triticum aestivum OX=4565 PE=3 SV=1	3.20355	Condition 2	Condition 1	3.91e-06	5.18618	2482.78	2424.65	2675.1	8098.09	7887.96	8304.95	2488.87	2453.04	2564.51	8098.09	7699.46	7960.27	1	1	1	1	1	1
44.53_2246.0370n	No	2	#10446,#6706	2,3	44.5304	2246.04	6.1831	YPTSPQQPGQGQQLGQGQQGY		P08488	Glutenin_ high molecular weight subunit 12 OS=Triticum aestivum OX=4565 PE=3 SV=1	1.82358	Condition 2	Condition 1	0.0085514	21.8063	2527.75	1691.02	1862.29	3425.51	3926.7	3737.13	2533.95	1710.83	1785.3	3425.51	3832.86	3582.02	2	2	0	2	2	2
42.08_1344.6212n	No	1	#2871	2	42.0809	1344.62	5.397	EACRQVVDQQL	[3] Carbamidomethyl C	P08488	Glutenin_ high molecular weight subunit 12 OS=Triticum aestivum OX=4565 PE=3 SV=1	1.57203	Condition 2	Condition 1	7.06e-05	3.33971	2896.98	3069.93	2914.24	4814.93	4504.79	4641.68	2904.09	3105.88	2793.75	4814.93	4397.14	4449.03	0	0	0	1	1	0
53.07_2854.3109n	No	1	#4656	3	53.0672	2854.31	5.4028	YPTSLQQPGQGQQQGQGQQGYYPTSL	[8] Hydroxyproline	P08488	Glutenin_ high molecular weight subunit 12 OS=Triticum aestivum OX=4565 PE=3 SV=1	1.83214	Condition 2	Condition 1	0.000155876	6.72895	2964.8	2775.71	2829.71	5589.95	4885.71	5226.15	2972.07	2808.22	2712.72	5589.95	4768.95	5009.25	0	1	1	0	0	0
51.70_1394.6380n	No	1	#5209	2	51.7024	1394.64	5.3631	QCERELQESSL	[N-term] Pyroglutamic acid|[2] Carbamidomethyl C	P08488	Glutenin_ high molecular weight subunit 12 OS=Triticum aestivum OX=4565 PE=3 SV=1	1.59669	Condition 2	Condition 1	0.000347592	6.46314	3145	3360.27	3579.53	5404.47	5186.16	5511.69	3152.71	3399.63	3431.54	5404.47	5062.22	5282.93	1	0	0	0	1	0
58.07_1889.8745n	No	1	#4234	2	58.0738	1889.87	5.4025	QESSLEACRQVVDQQL	[8] Carbamidomethyl C|[10] Deamidation Q	P08488	Glutenin_ high molecular weight subunit 12 OS=Triticum aestivum OX=4565 PE=3 SV=1	1.32563	Condition 2	Condition 1	0.00358027	7.92174	4577.81	4029.03	3978.67	5598.85	5648.01	5436.9	4589.04	4076.22	3814.18	5598.85	5513.04	5211.25	0	0	0	1	0	1
41.64_1614.7405n	No	1	#1275	2	41.6352	1614.74	6.8976	QQSGQGQQGHYPTSL		P08488	Glutenin_ high molecular weight subunit 12 OS=Triticum aestivum OX=4565 PE=3 SV=1	2.91936	Condition 2	Condition 1	3.81e-06	5.03773	4670.51	5160.36	4992.34	14205.1	14541.6	14527.7	4681.96	5220.8	4785.94	14205.1	14194.1	13924.7	1	1	1	1	1	1
57.26_2179.1050n	No	1	#2098	3	57.2576	2179.1	5.4391	RDVSAKCRSVAVSQVARQY	[7] Carbamidomethyl C	P08488	Glutenin_ high molecular weight subunit 12 OS=Triticum aestivum OX=4565 PE=3 SV=1	1.60389	Condition 2	Condition 1	0.000539334	7.18614	5379.71	4665.93	4951.7	7781.81	8370.24	7902	5392.9	4720.58	4746.99	7781.81	8170.21	7574.04	1	1	1	1	0	0
57.06_960.5051n	No	2	#2001,#2064	1,2	57.0604	960.505	6.5282	QQLQQGIF		P08488	Glutenin_ high molecular weight subunit 12 OS=Triticum aestivum OX=4565 PE=3 SV=1	1.25694	Condition 2	Condition 1	0.000486694	3.37019	6292.21	6468.55	6727.46	8002.48	8201.48	8291.55	6307.64	6544.31	6449.33	8002.48	8005.49	7947.43	2	2	2	2	2	2
43.68_1527.7342n	No	1	#1597	2	43.6799	1527.73	7.031	YPTSPQQPGQGQQL		P08488	Glutenin_ high molecular weight subunit 12 OS=Triticum aestivum OX=4565 PE=3 SV=1	1.61717	Condition 2	Condition 1	0.000271782	5.73174	6922.49	7426.94	7313.57	10913.6	12160.9	11958.2	6939.47	7513.92	7011.21	10913.6	11870.3	11461.9	1	1	1	1	1	1
45.49_1139.4992n	No	1	#1610	2	45.4904	1139.5	5.5198	QMRCCQQL	[N-term] Pyroglutamic acid|[4] Carbamidomethyl C|[5] Carbamidomethyl C	P08488	Glutenin_ high molecular weight subunit 12 OS=Triticum aestivum OX=4565 PE=3 SV=1	1.13763	Condition 1	Condition 2	0.00927637	4.2105	7423.17	7037.98	6834.69	6088.75	6274.87	6355.8	7441.37	7120.41	6552.13	6088.75	6124.92	6092.01	1	0	0	1	0	0
49.00_876.4238n	No	1	#1260	1	48.9967	876.424	6.2289	YPGETTPL		P08488	Glutenin_ high molecular weight subunit 12 OS=Triticum aestivum OX=4565 PE=3 SV=1	1.20494	Condition 2	Condition 1	0.00337365	4.72986	7977.68	8530.83	8750.54	10028.7	10020.5	10386.3	7997.24	8630.74	8388.77	10028.7	9781.06	9955.27	1	1	1	1	1	1
44.40_2037.9674n	No	2	#2492,#2390	2,3	44.3999	2037.97	6.3699	YPGQASPQQPGQGQQPGKW		P08488	Glutenin_ high molecular weight subunit 12 OS=Triticum aestivum OX=4565 PE=3 SV=1	1.77993	Condition 1	Condition 2	0.0030193	14.9078	10371.9	10039.4	10186.9	4744.01	6207.85	6238.91	10397.4	10157	9765.78	4744.01	6059.5	5979.97	1	1	1	1	1	1
52.78_698.3930n	No	2	#2341,#785	1,2	52.7843	698.393	5.941	AGRLPW		P08488	Glutenin_ high molecular weight subunit 12 OS=Triticum aestivum OX=4565 PE=3 SV=1	1.29843	Condition 1	Condition 2	0.0011163	4.98354	13504	14513.6	14880	10864.4	10917.6	11256	13537.1	14683.6	14264.8	10864.4	10656.7	10788.8	1	1	1	1	0	1
48.83_1528.7057n	No	1	#627	2	48.8253	1528.71	5.7043	YPTSPQQPGQGQQL	[6] Deamidation Q	P08488	Glutenin_ high molecular weight subunit 12 OS=Triticum aestivum OX=4565 PE=3 SV=1	1.25771	Condition 1	Condition 2	0.000441807	3.45246	18946.2	18932.4	19440.8	14892.7	14884.6	15797.1	18992.6	19154.2	18637.1	14892.7	14529	15141.4	1	1	1	1	1	1
53.62_1906.9005n	No	2	#583,#6698	2,3	53.621	1906.9	5.4099	QESSLEACRQVVDQQL	[N-term] Pyroglutamic acid|[8] Carbamidomethyl C|[10] Deamidation Q	P08488	Glutenin_ high molecular weight subunit 12 OS=Triticum aestivum OX=4565 PE=3 SV=1	1.11797	Condition 1	Condition 2	0.0342512	6.0009	32293.7	28942.3	29417.7	26767.8	26887.1	27432.9	32372.9	29281.3	28201.5	26767.8	26244.6	26294.3	2	2	2	0	0	0
54.87_1261.6060n	No	1	#56	2	54.8708	1261.61	5.091	YPGETTPLQQL	[2] Hydroxyproline	P08488	Glutenin_ high molecular weight subunit 12 OS=Triticum aestivum OX=4565 PE=3 SV=1	1.00502	Condition 2	Condition 1	0.710243	2.10041	81073.3	78011	80735.7	79698.3	80527.1	80798.4	81272.1	78924.6	77397.9	79698.3	78602.8	77445	0	0	1	0	0	1
60.05_1818.9288n	No	1	#199	2	60.0486	1818.93	5.081	YPGETTPLQQLQQGIF		P08488	Glutenin_ high molecular weight subunit 12 OS=Triticum aestivum OX=4565 PE=3 SV=1	1.15049	Condition 2	Condition 1	0.000406803	1.70291	84374.8	82247.5	82304.7	94363.7	97329.9	94693.8	84581.7	83210.7	78902	94363.7	95004	90763.7	1	0	1	1	0	1
37.86_1741.7825n	Yes	2	#13457,#4150	2,3	37.8634	1741.78	5.0958	YPTSPLQSGQGQPGYY		P08489	Glutenin_ high molecular weight subunit PW212 OS=Triticum aestivum OX=4565 PE=3 SV=1	2.92569	Condition 1	Condition 2	0.000334792	14.2755	3548.15	3435.18	3940.9	1051.27	1400.71	1281.92	3556.85	3475.41	3777.98	1051.27	1367.23	1228.72	2	2	2	2	2	2
51.49_2327.0830n	Yes	2	#3020,#1142	2,3	51.486	2327.08	6.6342	QQPEQGQPGYYPTSPQQPGQL		P08489	Glutenin_ high molecular weight subunit PW212 OS=Triticum aestivum OX=4565 PE=3 SV=1	1.03297	Condition 1	Condition 2	0.59261	8.76599	17276.8	15590.8	14530.5	14952	15330.9	15602.3	17319.2	15773.4	13929.8	14952	14964.5	14954.7	2	2	2	2	2	2
42.67_4267.8866n	Yes	2	#488,#137	4,5	42.6749	4267.89	5.3186	YPGQASPQRPGQGQQPGQGQQSGQGQQGYYPTSPQQPGQW		P08489	Glutenin_ high molecular weight subunit PW212 OS=Triticum aestivum OX=4565 PE=3 SV=1	2.07853	Condition 1	Condition 2	3.87e-08	1.07486	86375.5	87011.9	88220.7	41774.2	42054.9	42033.2	86587.3	88031	84573.4	41774.2	41049.9	40288.7	2	2	0	0	0	2
49.05_2574.2170n	Yes	1	#16522	3	49.0482	2574.22	5.4046	LQPGQGQQGYYPTSPQQSGQGQQL		P08489	Glutenin_ high molecular weight subunit PW212 OS=Triticum aestivum OX=4565 PE=3 SV=1	10.3261	Condition 2	Condition 1	0.000138868	27.3246	70.6023	47.2507	43.4743	630.133	500.62	535.127	70.7754	47.8041	41.677	630.133	488.657	512.917	0	1	0	1	0	1
50.22_2956.3877n	Yes	1	#7112	3	50.2244	2956.39	5.7785	QQSGQGQHGYYPTSPQLSGQGQRPGQW		P08489	Glutenin_ high molecular weight subunit PW212 OS=Triticum aestivum OX=4565 PE=3 SV=1	11.5219	Condition 2	Condition 1	0.000340083	35.1558	139.895	220.601	292.975	2621.04	2583.21	2324.99	140.238	223.185	280.863	2621.04	2521.48	2228.49	1	1	0	1	1	0
54.80_1888.8684n	Yes	1	#17383	2	54.8022	1888.87	5.3065	YPTSPQQSGQGQQLGQW		P08489	Glutenin_ high molecular weight subunit PW212 OS=Triticum aestivum OX=4565 PE=3 SV=1	1.2296	Condition 1	Condition 2	0.184021	17.4674	328.022	462.326	376.988	349.999	328.85	270.51	328.827	467.741	361.403	349.999	320.992	259.283	0	1	1	1	1	1
30.55_1088.4766n	Yes	1	#13337	2	30.5465	1088.48	5.0643	QQSGQGQHGY		P08489	Glutenin_ high molecular weight subunit PW212 OS=Triticum aestivum OX=4565 PE=3 SV=1	1.62157	Condition 1	Condition 2	0.0806894	33.1364	430.635	356.111	444.591	322.327	277.179	159.841	431.691	360.281	426.21	322.327	270.555	153.207	0	1	0	0	0	1
47.84_2574.2174n	Yes	1	#6365	3	47.8375	2574.22	5.6207	LQPGQGQQGYYPTSPQQSGQGQQL		P08489	Glutenin_ high molecular weight subunit PW212 OS=Triticum aestivum OX=4565 PE=3 SV=1	3.16185	Condition 2	Condition 1	9.79e-07	3.30088	1649.71	1572.65	1549.41	4938.54	5161.06	4988	1653.76	1591.07	1485.35	4938.54	5037.73	4780.98	1	0	1	0	1	0
43.14_4601.1195n	Yes	1	#8475	4	43.1377	4601.12	5.7286	GQGQQGQQPGQGQQPAQGQQGQQPGQGQQGQQPGQGQQPGQGQPW		P08489	Glutenin_ high molecular weight subunit PW212 OS=Triticum aestivum OX=4565 PE=3 SV=1	2.57652	Condition 1	Condition 2	0.000252108	12.7158	2355.21	2390.41	2292.04	970.176	984.238	777.048	2360.98	2418.41	2197.28	970.176	960.718	744.798	1	1	1	0	1	1
60.15_2859.3644n	Yes	1	#9287	3	60.1514	2859.36	5.1088	AQGQQGQQPAQVQQGQQPAQGQQGQQL	[18] Hydroxyproline	P08489	Glutenin_ high molecular weight subunit PW212 OS=Triticum aestivum OX=4565 PE=3 SV=1	1.13839	Condition 1	Condition 2	0.0696869	9.37815	2644.59	2640.75	2638.08	2116.77	2293.86	2549.55	2651.08	2671.68	2529.01	2116.77	2239.05	2443.74	1	0	1	1	0	0
41.18_2998.3550n	Yes	1	#6002	3	41.1783	2998.36	5.0764	YPGQASPQRPGQGQQPGQGQQSGQGQQGY		P08489	Glutenin_ high molecular weight subunit PW212 OS=Triticum aestivum OX=4565 PE=3 SV=1	1.32873	Condition 2	Condition 1	0.00574779	9.18024	3190.35	3173.75	3124.84	4642.48	3920.89	4044.93	3198.18	3210.92	2995.65	4642.48	3827.19	3877.05	0	0	1	0	1	0
46.43_1147.5277n	Yes	1	#4685	2	46.4273	1147.53	5.0752	QQPEQGQPGY	[N-term] Pyroglutamic acid	P08489	Glutenin_ high molecular weight subunit PW212 OS=Triticum aestivum OX=4565 PE=3 SV=1	1.04927	Condition 2	Condition 1	0.606067	12.5756	3248.04	3397.95	3478.6	3057.73	3631.1	3934.63	3256	3437.74	3334.78	3057.73	3544.32	3771.33	0	1	0	1	1	1
37.60_2843.3682n	Yes	1	#3414	3	37.5977	2843.37	6.5839	AQGQQGQQPAQVQQGQQPAQGQQGQQL		P08489	Glutenin_ high molecular weight subunit PW212 OS=Triticum aestivum OX=4565 PE=3 SV=1	1.05533	Condition 2	Condition 1	0.360551	7.62595	4120.67	3859.74	4490.63	4126.79	4524.21	4510.03	4130.78	3904.94	4304.97	4126.79	4416.1	4322.84	1	1	1	1	1	1
46.12_1214.5957n	Yes	1	#1958	2	46.1187	1214.6	6.8449	YPTSPQQPGQL		P08489	Glutenin_ high molecular weight subunit PW212 OS=Triticum aestivum OX=4565 PE=3 SV=1	1.55501	Condition 2	Condition 1	3.59e-05	2.70879	4423.89	4670.17	4556.06	6879.14	7093.69	7253.24	4434.74	4724.87	4367.7	6879.14	6924.18	6952.21	1	1	1	1	1	1
54.14_2501.2474n	Yes	1	#727	3	54.1409	2501.25	5.5837	EQQIVVPKGGSFYPGETTPPQQL	[2] Deamidation Q|[3] Deamidation Q	P08489	Glutenin_ high molecular weight subunit PW212 OS=Triticum aestivum OX=4565 PE=3 SV=1	1.14801	Condition 2	Condition 1	0.000622696	2.44354	24718.5	24314.5	25508.2	28461.9	28476.2	28636.1	24779.2	24599.3	24453.6	28461.9	27795.8	27447.6	0	1	0	0	1	1
39.39_1221.5480n	No	1	#10322	2	39.3912	1221.55	5.9399	QQPGQGQPGYY		P08489	Glutenin_ high molecular weight subunit PW212 OS=Triticum aestivum OX=4565 PE=3 SV=1	18.8027	Condition 2	Condition 1	0.00013775	35.9686	81.1871	162.757	105.43	2062.17	2381.75	2125.28	81.3862	164.663	101.071	2062.17	2324.83	2037.07	0	0	0	1	1	1
53.24_1297.5931n	No	1	#15443	2	53.2386	1297.59	5.8048	GQGQQGYYPTSL		P08489	Glutenin_ high molecular weight subunit PW212 OS=Triticum aestivum OX=4565 PE=3 SV=1	4.83143	Condition 2	Condition 1	0.000341859	22.4555	83.7521	79.9801	68.6632	470.621	316.081	336.099	83.9575	80.9168	65.8244	470.621	308.527	322.15	0	0	0	1	0	1
26.09_1678.7357n	No	1	#17312	2	26.0877	1678.74	5.4289	QQTGQGQQSGQGQQGY		P08489	Glutenin_ high molecular weight subunit PW212 OS=Triticum aestivum OX=4565 PE=3 SV=1	4.62734	Condition 2	Condition 1	0.00795569	48.0964	84.5381	37.1512	110.615	374.091	328.136	372.721	84.7454	37.5863	106.041	374.091	320.294	357.252	0	0	1	1	1	1
57.19_1538.7376n	No	1	#5589	2	57.189	1538.74	6.3291	QLGQGQQGYYPTSL		P08489	Glutenin_ high molecular weight subunit PW212 OS=Triticum aestivum OX=4565 PE=3 SV=1	15.0322	Condition 2	Condition 1	6.65e-06	14.3683	158.346	134.679	179.972	2424.56	2444.06	2241.58	158.734	136.257	172.531	2424.56	2385.66	2148.55	0	1	1	1	1	1
32.00_1058.4810n	No	1	#12894	2	31.9972	1058.48	5.3267	QQPGQGQPGY		P08489	Glutenin_ high molecular weight subunit PW212 OS=Triticum aestivum OX=4565 PE=3 SV=1	3.4924	Condition 2	Condition 1	0.00051928	20.2976	220.428	329.013	261.228	1012.69	873.445	945.044	220.968	332.867	250.428	1012.69	852.572	905.821	0	0	0	0	1	1
35.69_977.4592n	No	1	#6924	2	35.691	977.459	5.0141	QLGQGQQGY		P08489	Glutenin_ high molecular weight subunit PW212 OS=Triticum aestivum OX=4565 PE=3 SV=1	3.47888	Condition 2	Condition 1	0.00100869	23.5993	275.607	325.171	434.8	1132.13	1117.92	1352.61	276.283	328.98	416.824	1132.13	1091.21	1296.47	1	0	0	1	1	1
32.66_2629.2239n	No	1	#20609	4	32.6594	2629.22	5.1641	QQPGQGQPGYYPTSPLQPGQGQPGY		P08489	Glutenin_ high molecular weight subunit PW212 OS=Triticum aestivum OX=4565 PE=3 SV=1	3.54633	Condition 1	Condition 2	0.21547	87.8676	298.129	269.206	193.26	117.858	96.6159	0	298.86	272.359	185.27	117.858	94.3071	0	1	1	0	0	0	0
28.10_1132.5343n	No	1	#10270	2	28.0977	1132.53	5.2518	TVAEGEASEQL		P08489	Glutenin_ high molecular weight subunit PW212 OS=Triticum aestivum OX=4565 PE=3 SV=1	1.20752	Condition 1	Condition 2	0.0780742	14.2784	353.943	361.419	378.85	286.352	350.836	268.979	354.811	365.652	363.187	286.352	342.452	257.815	1	1	1	1	1	1
49.55_2231.0836n	No	1	#13979	3	49.5453	2231.08	5.1112	VALTVAEGEASEQLQCEREL	[16] Carbamidomethyl C	P08489	Glutenin_ high molecular weight subunit PW212 OS=Triticum aestivum OX=4565 PE=3 SV=1	2.1789	Condition 2	Condition 1	0.00163599	17.0231	376.668	310.54	269.08	734.837	700.334	648.488	377.592	314.178	257.955	734.837	683.598	621.574	1	0	1	0	0	0
55.91_692.3731n	No	1	#7479	1	55.91	692.373	5.7656	YLTSPL		P08489	Glutenin_ high molecular weight subunit PW212 OS=Triticum aestivum OX=4565 PE=3 SV=1	1.53082	Condition 2	Condition 1	0.000167299	4.40811	408.777	429.951	405.247	621.268	616.097	666.94	409.779	434.987	388.493	621.268	601.374	639.26	0	0	0	1	1	1
31.11_1671.7976n	No	1	#18171	2	31.1122	1671.8	5.0681	AAQLPAMCRLEGGDAL	[8] Carbamidomethyl C	P08489	Glutenin_ high molecular weight subunit PW212 OS=Triticum aestivum OX=4565 PE=3 SV=1	1.12567	Condition 2	Condition 1	0.417584	29.381	412.602	384.555	641.389	527.195	544.925	547.203	413.614	389.059	614.872	527.195	531.903	524.493	1	1	0	0	0	0
51.02_1885.9026n	No	1	#17395	2	51.0231	1885.9	5.1301	YPTSPQLSGQGQRPGQW		P08489	Glutenin_ high molecular weight subunit PW212 OS=Triticum aestivum OX=4565 PE=3 SV=1	1.58383	Condition 1	Condition 2	0.0146468	17.747	473.074	451.946	420.114	316.027	307.995	225.269	474.234	457.239	402.745	316.027	300.635	215.92	1	1	0	0	1	0
55.84_1635.7897n	No	1	#3326	2	55.8415	1635.79	6.6935	LQPGQGQQGYYPTSL		P08489	Glutenin_ high molecular weight subunit PW212 OS=Triticum aestivum OX=4565 PE=3 SV=1	9.07585	Condition 2	Condition 1	1.87e-06	8.18094	539.533	479.398	462.718	4475.14	4301	4671.08	540.856	485.013	443.588	4475.14	4198.22	4477.21	1	1	1	1	1	1
42.32_1347.6302n	No	1	#6134	2	42.3209	1347.63	6.0641	KACQQVMDQQL	[3] Carbamidomethyl C	P08489	Glutenin_ high molecular weight subunit PW212 OS=Triticum aestivum OX=4565 PE=3 SV=1	2.43165	Condition 2	Condition 1	0.000312492	10.0318	613.787	629.134	735.26	1443.4	1697.45	1669.4	615.292	636.502	704.863	1443.4	1656.89	1600.11	0	1	1	1	1	1
34.16_1554.7237n	No	1	#5078	4	34.1617	1554.72	---	QLGQGQQGYYPTSL	[11] Hydroxyproline	P08489	Glutenin_ high molecular weight subunit PW212 OS=Triticum aestivum OX=4565 PE=3 SV=1	4.20574	Condition 2	Condition 1	0.00145164	27.5035	621.696	678.071	386.592	2060.58	2553.94	2477.87	623.22	686.012	370.609	2060.58	2492.91	2375.03	0	0	0	0	0	0
46.94_1203.5526n	No	1	#8346	2	46.9353	1203.55	5.2604	QCERELQEL	[2] Carbamidomethyl C	P08489	Glutenin_ high molecular weight subunit PW212 OS=Triticum aestivum OX=4565 PE=3 SV=1	1.15196	Condition 1	Condition 2	0.108724	8.62248	695.704	796.2	812.036	629.539	732.885	637.592	697.41	805.525	778.464	629.539	715.372	611.129	0	1	0	0	1	0
37.28_1081.5161n	No	1	#10555	2	37.2788	1081.52	5.1416	QQLGQGQSGY	[N-term] Pyroglutamic acid	P08489	Glutenin_ high molecular weight subunit PW212 OS=Triticum aestivum OX=4565 PE=3 SV=1	1.19775	Condition 1	Condition 2	0.0579299	11.6843	703.152	691.198	680.515	501.292	629.778	601.239	704.877	699.293	652.381	501.292	614.728	576.285	1	1	0	1	0	0
74.16_655.3704n	No	1	#5003	1	74.1603	655.37	5.9008	WGIPAL		P08489	Glutenin_ high molecular weight subunit PW212 OS=Triticum aestivum OX=4565 PE=3 SV=1	1.44035	Condition 2	Condition 1	0.00858545	12.3171	963.842	1030.43	806.496	1408.6	1308.56	1316.93	966.205	1042.5	773.153	1408.6	1277.29	1262.27	1	1	1	1	1	1
42.66_804.3878n	No	1	#2779	1	42.6577	804.388	5.2238	YPTSPQL		P08489	Glutenin_ high molecular weight subunit PW212 OS=Triticum aestivum OX=4565 PE=3 SV=1	3.45264	Condition 2	Condition 1	9.33e-05	13.5094	1016	1327.48	1139.57	4016.57	3907.83	4101.32	1018.49	1343.03	1092.46	4016.57	3814.45	3931.1	0	0	0	1	1	1
48.33_1588.7575n	No	1	#7751	2	48.3347	1588.76	5.3097	YPTSPLQPGQGQPGY		P08489	Glutenin_ high molecular weight subunit PW212 OS=Triticum aestivum OX=4565 PE=3 SV=1	1.62405	Condition 1	Condition 2	0.0118428	20.3839	1060.13	1111.65	1094.36	826.955	608.886	575.261	1062.73	1124.67	1049.12	826.955	594.335	551.386	1	0	0	0	1	0
51.79_2036.8869n	No	1	#9984	2	51.7881	2036.89	6.067	YYPTSPQESGQGQQPGQW		P08489	Glutenin_ high molecular weight subunit PW212 OS=Triticum aestivum OX=4565 PE=3 SV=1	1.43735	Condition 2	Condition 1	0.00350976	7.55923	1128.86	1292.36	1190.95	1863.17	1727.22	1601.59	1131.63	1307.5	1141.72	1863.17	1685.94	1535.11	0	1	1	1	1	1
55.39_1885.9140n	No	1	#11552	2	55.3851	1885.91	5.3275	YPTSPQLSGQGQRPGQW		P08489	Glutenin_ high molecular weight subunit PW212 OS=Triticum aestivum OX=4565 PE=3 SV=1	1.08092	Condition 1	Condition 2	0.153659	5.8049	1139.42	1055.08	1183.76	1098.76	998.865	1027.72	1142.21	1067.43	1134.82	1098.76	974.995	985.065	0	0	1	1	0	0
35.10_2344.0216n	No	1	#7117	3	35.0979	2344.02	5.266	GQGQQGYYPTSLQQSGQGQPGY	[9] Hydroxyproline	P08489	Glutenin_ high molecular weight subunit PW212 OS=Triticum aestivum OX=4565 PE=3 SV=1	2.06609	Condition 2	Condition 1	0.000459747	10.9307	1140.62	937.798	1141.36	2250.07	2118.99	2283.31	1143.42	948.781	1094.17	2250.07	2068.35	2188.55	0	0	1	1	0	0
56.98_2020.0006n	No	1	#9092	2	56.9833	2020	5.4085	QERELKACQQVMDQQL	[N-term] Pyroglutamic acid|[8] Carbamidomethyl C	P08489	Glutenin_ high molecular weight subunit PW212 OS=Triticum aestivum OX=4565 PE=3 SV=1	1.16656	Condition 2	Condition 1	0.0102081	4.86993	1147.52	1103.57	1078.36	1228.93	1354.63	1300.46	1150.33	1116.49	1033.78	1228.93	1322.26	1246.48	0	0	1	0	0	1
57.48_658.3545n	No	1	#3742	1	57.4804	658.354	5.6699	TSPLQL	[5] Deamidation Q	P08489	Glutenin_ high molecular weight subunit PW212 OS=Triticum aestivum OX=4565 PE=3 SV=1	1.26495	Condition 1	Condition 2	0.0012534	4.94391	1274.35	1354.4	1406.36	1058.39	1062.62	1068.92	1277.48	1370.26	1348.22	1058.39	1037.23	1024.56	1	1	1	1	1	0
50.57_2913.2753n	No	1	#8638	3	50.5672	2913.28	5.1294	YPTSPQQSGQGQQPGQWQQPGQGQPGY		P08489	Glutenin_ high molecular weight subunit PW212 OS=Triticum aestivum OX=4565 PE=3 SV=1	2.17812	Condition 1	Condition 2	0.00150605	13.2118	1303.08	1110.81	1034.09	477.623	498.089	607.298	1306.28	1123.82	991.339	477.623	486.187	582.093	1	1	1	1	1	1
32.13_1309.6391n	No	1	#4839	2	32.1343	1309.64	5.4758	QQPAQGQQGQQL		P08489	Glutenin_ high molecular weight subunit PW212 OS=Triticum aestivum OX=4565 PE=3 SV=1	1.20071	Condition 2	Condition 1	0.365889	24.4369	1319.61	1537.71	1281.2	1208.01	1994.83	1766.34	1322.85	1555.72	1228.23	1208.01	1947.16	1693.03	1	1	1	1	1	1
48.67_1334.6193n	No	1	#5806	2	48.671	1334.62	5.2502	QQPGQGQPGYYL		P08489	Glutenin_ high molecular weight subunit PW212 OS=Triticum aestivum OX=4565 PE=3 SV=1	1.29169	Condition 2	Condition 1	0.0539086	16.578	1359.79	1670.37	1903.17	2095.32	2125.94	2151.1	1363.13	1689.93	1824.49	2095.32	2075.14	2061.82	0	1	1	1	0	0
40.19_1858.9000n	No	1	#11037	2	40.1905	1858.9	5.2258	QCERELQELQEREL	[2] Carbamidomethyl C	P08489	Glutenin_ high molecular weight subunit PW212 OS=Triticum aestivum OX=4565 PE=3 SV=1	1.12476	Condition 1	Condition 2	0.159646	11.2907	1411.38	1531.5	1526.84	1481.54	1308.72	1183.69	1414.84	1549.44	1463.72	1481.54	1277.44	1134.56	0	1	0	0	1	0
51.52_1319.6238n	No	1	#6326	2	51.5202	1319.62	5.0667	YPTSSQLQPGQL	[6] Deamidation Q|[8] Deamidation Q	P08489	Glutenin_ high molecular weight subunit PW212 OS=Triticum aestivum OX=4565 PE=3 SV=1	1.13293	Condition 2	Condition 1	0.0107586	4.39841	1525.85	1558.03	1500.66	1658.43	1725.2	1810.36	1529.59	1576.28	1438.62	1658.43	1683.97	1735.22	1	0	1	0	0	0
37.49_1043.5289n	No	1	#1978	2	37.4948	1043.53	5.9428	QELQEREL		P08489	Glutenin_ high molecular weight subunit PW212 OS=Triticum aestivum OX=4565 PE=3 SV=1	2.97032	Condition 2	Condition 1	5.83e-05	8.69345	1648	1961.99	1807.96	5051.76	5344.49	5696.79	1652.04	1984.97	1733.22	5051.76	5216.78	5460.36	1	1	0	1	1	1
47.47_1588.7612n	No	1	#4770	2	47.4667	1588.76	5.2595	YPTSPLQPGQGQPGY		P08489	Glutenin_ high molecular weight subunit PW212 OS=Triticum aestivum OX=4565 PE=3 SV=1	1.11462	Condition 2	Condition 1	0.20781	13.2264	1779.78	1501.86	1378.68	1712.87	1773.43	1708.19	1784.15	1519.45	1321.68	1712.87	1731.05	1637.3	0	0	1	1	0	0
34.96_1074.5128n	No	1	#2038	2	34.9607	1074.51	6.831	LQPGQGQQGY		P08489	Glutenin_ high molecular weight subunit PW212 OS=Triticum aestivum OX=4565 PE=3 SV=1	1.68872	Condition 2	Condition 1	0.2974	47.4037	1788.73	1370.38	1191.3	1111.33	3041.34	3193.93	1793.11	1386.42	1142.05	1111.33	2968.66	3061.37	1	0	0	0	1	1
36.09_1176.5905n	No	1	#1762	2	36.0853	1176.59	6.3162	HVSVEHQAASL		P08489	Glutenin_ high molecular weight subunit PW212 OS=Triticum aestivum OX=4565 PE=3 SV=1	2.44021	Condition 2	Condition 1	0.000346953	12.5714	1946.33	1960.24	2078.88	5284.03	4165.72	5155.96	1951.1	1983.19	1992.93	5284.03	4066.17	4941.97	1	0	1	1	1	1
62.40_1676.7947n	No	1	#5778	2	62.4004	1676.79	5.0764	YSSYHVSVEHQAASL		P08489	Glutenin_ high molecular weight subunit PW212 OS=Triticum aestivum OX=4565 PE=3 SV=1	1.32175	Condition 2	Condition 1	0.00256978	6.57158	1960.01	2058.55	1977.72	2699.62	2779.22	2446.73	1964.82	2082.66	1895.96	2699.62	2712.81	2345.18	0	0	1	1	0	1
73.82_794.3820n	No	1	#4490	1	73.824	794.382	5.7944	YPTSSQL		P08489	Glutenin_ high molecular weight subunit PW212 OS=Triticum aestivum OX=4565 PE=3 SV=1	4.59238	Condition 1	Condition 2	3.53e-05	10.8378	1978.3	1893.19	1733.54	429.845	434.664	355.999	1983.15	1915.36	1661.88	429.845	424.277	341.224	1	0	1	1	0	0
50.87_1287.5918n	No	1	#5081	2	50.8688	1287.59	6.0112	YPTSPQQPGQW		P08489	Glutenin_ high molecular weight subunit PW212 OS=Triticum aestivum OX=4565 PE=3 SV=1	1.68037	Condition 1	Condition 2	0.00157342	9.36755	1981.27	2151.75	1876.77	1283.97	1224.66	1067.83	1986.13	2176.95	1799.18	1283.97	1195.39	1023.51	1	1	1	1	1	1
53.83_2373.1499n	No	1	#6375	3	53.8323	2373.15	5.3262	QELQERELKACQQVMDQQL	[11] Carbamidomethyl C	P08489	Glutenin_ high molecular weight subunit PW212 OS=Triticum aestivum OX=4565 PE=3 SV=1	1.06936	Condition 2	Condition 1	0.135532	4.8126	2185.51	2187.25	2341.13	2517.74	2290.54	2371.29	2190.87	2212.86	2244.34	2517.74	2235.8	2272.87	1	1	0	1	0	0
53.00_1542.7017n	No	1	#3135	3	52.9986	1542.7	5.1129	TSPQQSGQGQQPGQL	[10] Deamidation Q|[11] Deamidation Q|[14] Deamidation Q	P08489	Glutenin_ high molecular weight subunit PW212 OS=Triticum aestivum OX=4565 PE=3 SV=1	2.08597	Condition 2	Condition 1	7.32e-05	7.12736	2304.42	2431.9	2407.9	5376.32	4768.98	4757.34	2310.07	2460.38	2308.35	5376.32	4655.02	4559.9	0	1	0	0	1	0
41.67_1517.7112n	No	1	#4906	2	41.6694	1517.71	5.7789	YPTSPQQSGQGQQL		P08489	Glutenin_ high molecular weight subunit PW212 OS=Triticum aestivum OX=4565 PE=3 SV=1	1.32337	Condition 2	Condition 1	0.00390305	7.90444	2525.25	2854.07	2472.18	3530.51	3365.51	3494.43	2531.44	2887.49	2369.97	3530.51	3285.09	3349.4	1	1	1	1	1	1
46.80_2674.2324n	No	1	#6203	3	46.7981	2674.23	5.9487	QPGQGQPGYDPTSPQQPGQGQQPGQL		P08489	Glutenin_ high molecular weight subunit PW212 OS=Triticum aestivum OX=4565 PE=3 SV=1	1.0121	Condition 1	Condition 2	0.655447	3.76652	2673.35	2578.56	2479.24	2537.39	2504.18	2597.17	2679.91	2608.76	2376.74	2537.39	2444.34	2489.38	1	1	1	1	1	1
45.08_1203.5652n	No	1	#3516	2	45.079	1203.57	5.2834	QCERELQEL	[2] Carbamidomethyl C	P08489	Glutenin_ high molecular weight subunit PW212 OS=Triticum aestivum OX=4565 PE=3 SV=1	2.12385	Condition 1	Condition 2	3.57e-06	2.83385	2740	2850.04	2847.91	1330.43	1284.1	1358.41	2746.72	2883.42	2730.17	1330.43	1253.42	1302.03	1	0	0	1	0	0
42.57_1522.7073n	No	1	#2113	2	42.572	1522.71	5.3014	QPGQGQQGYYPTSL		P08489	Glutenin_ high molecular weight subunit PW212 OS=Triticum aestivum OX=4565 PE=3 SV=1	1.22941	Condition 2	Condition 1	0.0214816	9.38854	2789.14	3368.03	3111.32	3919.14	3708.67	3766.96	2795.98	3407.47	2982.69	3919.14	3620.05	3610.62	1	1	0	0	1	0
51.47_2856.3399n	No	1	#4859	3	51.4688	2856.34	6.2699	QQLGQGQSGYYPTSPQQPGQGQQPGQL		P08489	Glutenin_ high molecular weight subunit PW212 OS=Triticum aestivum OX=4565 PE=3 SV=1	1.11824	Condition 2	Condition 1	0.191692	12.9766	2849.85	2350.14	2247.76	2689.6	2823.79	2815.01	2856.84	2377.67	2154.83	2689.6	2756.31	2698.18	1	1	1	1	1	1
37.11_1873.8091n	No	1	#2556	3	37.1073	1873.81	5.3145	YPTSPQESGQGQQPGQW		P08489	Glutenin_ high molecular weight subunit PW212 OS=Triticum aestivum OX=4565 PE=3 SV=1	1.12657	Condition 2	Condition 1	0.130871	10.0387	3240.19	3187.2	3384.33	4037	3299.41	3717.2	3248.13	3224.53	3244.41	4037	3220.56	3562.92	0	0	0	1	1	1
46.14_1609.7473n	No	1	#3855	2	46.1358	1609.75	5.3152	QQSGQGQPGYYPTSL		P08489	Glutenin_ high molecular weight subunit PW212 OS=Triticum aestivum OX=4565 PE=3 SV=1	1.00544	Condition 1	Condition 2	0.872967	3.99765	3289.27	3036.82	3154.2	3010.9	3203.92	3214.16	3297.34	3072.39	3023.8	3010.9	3127.35	3080.76	0	1	1	1	1	1
50.45_2044.9743n	No	2	#9738,#8359	2,3	50.4472	2044.97	5.2388	AAQLPAMCRLEGGDALSASQ	[8] Carbamidomethyl C	P08489	Glutenin_ high molecular weight subunit PW212 OS=Triticum aestivum OX=4565 PE=3 SV=1	1.11666	Condition 2	Condition 1	0.0593913	7.00001	3788.72	3438.93	3314.24	3973.1	3803.98	3994.65	3798.01	3479.21	3177.22	3973.1	3713.07	3828.85	0	0	0	0	2	2
51.77_1825.8640n	No	1	#3986	2	51.7709	1825.86	5.2535	YPTSPQQPGQGQQPGQL	[14] Hydroxyproline	P08489	Glutenin_ high molecular weight subunit PW212 OS=Triticum aestivum OX=4565 PE=3 SV=1	1.21818	Condition 2	Condition 1	0.00780833	5.32531	4724.28	4702.25	5091.09	6242.7	5632.33	5810.08	4735.86	4757.32	4880.61	6242.7	5497.74	5568.94	0	1	0	0	1	0
55.54_1716.8109n	No	1	#3505	2	55.5394	1716.81	6.6004	QQPGQGQPGYYPTSPL		P08489	Glutenin_ high molecular weight subunit PW212 OS=Triticum aestivum OX=4565 PE=3 SV=1	1.4594	Condition 1	Condition 2	0.0127908	14.9057	5215.4	4117.03	4021.34	3116.93	2899.86	3133.41	5228.19	4165.25	3855.09	3116.93	2830.56	3003.36	1	1	1	1	1	1
45.91_2109.0238n	No	1	#1851	3	45.913	2109.02	5.2621	RDISPECHPVVVSPVAGQY	[7] Carbamidomethyl C	P08489	Glutenin_ high molecular weight subunit PW212 OS=Triticum aestivum OX=4565 PE=3 SV=1	2.16102	Condition 1	Condition 2	1.02e-05	4.26493	5887.61	5671.75	5663.69	2748.67	2530.09	2691.12	5902.05	5738.18	5429.54	2748.67	2469.63	2579.43	1	1	1	1	1	1
46.14_2002.9579n	No	2	#8578,#1559	2,3	46.1444	2002.96	5.8124	QERELKACQQVMDQQL	[8] Carbamidomethyl C	P08489	Glutenin_ high molecular weight subunit PW212 OS=Triticum aestivum OX=4565 PE=3 SV=1	1.62426	Condition 2	Condition 1	0.00051268	7.48642	6456.85	5927.78	6888.01	10051.1	10536.5	10716.2	6472.68	5997.21	6603.24	10051.1	10284.7	10271.4	0	0	0	0	2	2
47.68_1354.6426n	No	1	#1702	2	47.6833	1354.64	5.5144	QQPGQGQQPGQW	[N-term] Pyroglutamic acid	P08489	Glutenin_ high molecular weight subunit PW212 OS=Triticum aestivum OX=4565 PE=3 SV=1	1.06328	Condition 2	Condition 1	0.139502	5.05667	6789.69	7235.76	7508.72	7877.29	7560.07	7459.51	6806.34	7320.5	7198.29	7877.29	7379.41	7149.91	0	0	1	0	0	1
52.69_1375.6599n	No	1	#812	2	52.69	1375.66	5.0841	TSPLQLGQGQQGY		P08489	Glutenin_ high molecular weight subunit PW212 OS=Triticum aestivum OX=4565 PE=3 SV=1	1.50083	Condition 2	Condition 1	0.00304611	10.5249	7211.22	8528.09	8833.5	11980.9	12403	12495.7	7228.91	8627.97	8468.3	11980.9	12106.6	11977.1	0	1	1	0	0	1
9.83_1212.5939n	No	1	#3187	2	9.82928	1212.59	5.1408	SGQGQRPGQWL		P08489	Glutenin_ high molecular weight subunit PW212 OS=Triticum aestivum OX=4565 PE=3 SV=1	898.578	Condition 1	Condition 2	0.00304581	173.205	7554.36	8005.24	5506.58	23.4439	0	0	7572.89	8099	5278.92	23.4439	0	0	1	1	1	0	0	0
44.49_2088.0488n	No	2	#9969,#1518	2,3	44.4857	2088.05	5.5511	YPGETTPPQQLQQRIFW		P08489	Glutenin_ high molecular weight subunit PW212 OS=Triticum aestivum OX=4565 PE=3 SV=1	1.31158	Condition 2	Condition 1	0.0276394	14.2609	9207.62	7107.64	7438.23	10073.9	10341	10739.9	9230.2	7190.89	7130.71	10073.9	10093.8	10294.1	0	1	2	0	2	2
46.01_1979.9240n	No	2	#6350,#3982	2,3	46.0073	1979.92	5.3713	QQSGQGQPGYYPTSLQQL	[7] Deamidation Q	P08489	Glutenin_ high molecular weight subunit PW212 OS=Triticum aestivum OX=4565 PE=3 SV=1	1.04825	Condition 1	Condition 2	0.00823282	1.35642	10551.8	10578.3	10814.1	10099.2	10274.5	10100.1	10577.7	10702.2	10367.1	10099.2	10029	9680.92	0	2	0	0	0	2
41.62_1652.8126n	No	1	#906	2	41.618	1652.81	7.1459	LTSPQQSGQGQQPGQL		P08489	Glutenin_ high molecular weight subunit PW212 OS=Triticum aestivum OX=4565 PE=3 SV=1	1.28434	Condition 2	Condition 1	0.00424675	6.79368	12010.3	13744.9	13145	16110.4	16896.5	16953.9	12039.7	13905.8	12601.5	16110.4	16492.7	16250.3	1	1	1	1	1	1
54.17_2187.0310n	No	2	#3499,#1309	2,3	54.1666	2187.03	5.4768	YPTSLQQSGQGQPGYYPTSL	[2] Hydroxyproline	P08489	Glutenin_ high molecular weight subunit PW212 OS=Triticum aestivum OX=4565 PE=3 SV=1	1.02217	Condition 1	Condition 2	0.777603	10.4038	12608.8	10759.7	10435.9	10989.9	11461.7	10619.4	12639.7	10885.7	10004.4	10989.9	11187.8	10178.7	0	0	0	0	2	2
45.18_1809.8658n	No	1	#1431	2	45.1818	1809.87	6.8411	YPTSPQQPGQGQQPGQL		P08489	Glutenin_ high molecular weight subunit PW212 OS=Triticum aestivum OX=4565 PE=3 SV=1	1.143	Condition 1	Condition 2	0.00747297	4.25315	13400.4	12954	13333.6	12041.9	11620.2	11060.6	13433.2	13105.7	12782.4	12041.9	11342.5	10601.6	1	1	1	1	1	1
46.57_1947.8759n	No	2	#4293,#1532	2,3	46.5667	1947.88	5.5961	TVAEGEASEQLQCEREL	[13] Carbamidomethyl C	P08489	Glutenin_ high molecular weight subunit PW212 OS=Triticum aestivum OX=4565 PE=3 SV=1	1.93724	Condition 1	Condition 2	0.000815053	12.829	14288.4	11341.8	11742.5	6413.87	6362.48	6515.36	14323.5	11474.6	11257.1	6413.87	6210.43	6244.95	2	2	2	2	0	2
55.39_582.3757n	No	1	#157	1	55.3851	582.376	5.4324	GIPALL		P08489	Glutenin_ high molecular weight subunit PW212 OS=Triticum aestivum OX=4565 PE=3 SV=1	1.53965	Condition 1	Condition 2	0.00279243	10.054	24510.5	20310.6	24072.9	15565.8	14961.2	14219.5	24570.6	20548.5	23077.6	15565.8	14603.7	13629.3	1	1	1	0	0	0
50.54_2913.2814n	No	2	#1040,#991	3,4	50.5415	2913.28	5.1294	YPTSPQQSGQGQQPGQWQQPGQGQPGY		P08489	Glutenin_ high molecular weight subunit PW212 OS=Triticum aestivum OX=4565 PE=3 SV=1	1.56467	Condition 1	Condition 2	0.00546898	14.1315	40585.3	33932.6	30875.6	22026.1	22791.1	22541	40684.8	34330	29599.1	22026.1	22246.5	21605.5	1	1	1	1	1	1
32.83_1556.7592n	No	1	#520	3	32.8309	1556.76	5.376	QLGQGQQGYYPTSL	[N-term] Pyroglutamic acid|[6] Deamidation Q	P08489	Glutenin_ high molecular weight subunit PW212 OS=Triticum aestivum OX=4565 PE=3 SV=1	2.72718	Condition 1	Condition 2	2.74e-06	3.8935	151792	152812	158506	54615	56224.1	58973.3	152164	154602	151953	54615	54880.6	56525.7	1	1	1	0	0	0
66.37_884.4619n	Yes	2	#5404,#7002	1,2	66.3744	884.462	5.1758	QQLQQQL		P10385	Glutenin_ low molecular weight subunit OS=Triticum aestivum OX=4565 PE=3 SV=1	2.57335	Condition 1	Condition 2	3.61e-05	6.39454	1952.34	2165.29	2051.1	769.946	769.16	858.051	1957.13	2190.65	1966.3	769.946	750.779	822.439	2	0	2	2	0	0
30.38_996.4828n	Yes	2	#8581,#4236	1,2	30.3751	996.483	5.2045	QQQQPQQL		P10385	Glutenin_ low molecular weight subunit OS=Triticum aestivum OX=4565 PE=3 SV=1	1.2034	Condition 1	Condition 2	0.00456484	5.35838	2618.78	2494.23	2775.42	2151	2186.64	2217.48	2625.2	2523.44	2660.67	2151	2134.39	2125.45	2	0	0	0	2	1
63.77_988.4676n	Yes	2	#15862,#1098	1,2	63.7742	988.468	5.8742	TQQQQPPF	[6] Hydroxyproline	P10385	Glutenin_ low molecular weight subunit OS=Triticum aestivum OX=4565 PE=3 SV=1	1.06145	Condition 2	Condition 1	0.289194	8.90948	5957.56	5596.61	6660.34	6408.23	6453.95	6471.56	5972.17	5662.16	6384.98	6408.23	6299.72	6202.97	2	2	2	2	2	2
26.01_886.4356n	Yes	2	#14647,#1280	1,2	26.0106	886.436	5.8948	QQLQQQL	[4] Deamidation Q|[5] Deamidation Q	P10385	Glutenin_ low molecular weight subunit OS=Triticum aestivum OX=4565 PE=3 SV=1	1.43643	Condition 2	Condition 1	0.00206909	6.25242	6654.19	6870.28	7495.8	10178.6	9386.28	10629.3	6670.51	6950.74	7185.9	10178.6	9161.98	10188.2	0	0	2	0	2	0
43.79_958.4549n	Yes	2	#4611,#1021	1,2	43.7914	958.455	6.699	SQQQQPPF		P10385	Glutenin_ low molecular weight subunit OS=Triticum aestivum OX=4565 PE=3 SV=1	1.19987	Condition 1	Condition 2	0.00159236	3.04223	13729	14271.7	14502.2	11465.5	11775.7	12181.8	13762.6	14438.9	13902.7	11465.5	11494.3	11676.2	1	2	2	2	2	2
37.25_899.4648n	Yes	2	#5114,#1472	1,2	37.253	899.465	5.9722	QQQRPPF		P10385	Glutenin_ low molecular weight subunit OS=Triticum aestivum OX=4565 PE=3 SV=1	1.0115	Condition 2	Condition 1	0.832405	7.24884	14389.7	14135	14652.3	13479.2	14606.2	15588.1	14425	14300.6	14046.5	13479.2	14257.2	14941.1	2	2	2	2	2	2
30.05_1256.6210n	Yes	2	#11221,#191	1,2	30.0473	1256.62	5.4359	GQCVSQPLQQL	[3] Carbamidomethyl C	P10385	Glutenin_ low molecular weight subunit OS=Triticum aestivum OX=4565 PE=3 SV=1	1.22352	Condition 1	Condition 2	0.00518001	5.20881	52554.2	52927.5	56193.3	46693.7	42631.3	42814.6	52683.1	53547.4	53870.2	46693.7	41612.6	41037.7	1	1	0	0	1	1
58.40_2447.1883n	Yes	2	#1679,#189	2,3	58.3995	2447.19	5.6632	LQQQCIPVAMQRCLARSQML	[2] Deamidation Q|[5] Carbamidomethyl C|[13] Carbamidomethyl C|[19] Oxidation M	P10385	Glutenin_ low molecular weight subunit OS=Triticum aestivum OX=4565 PE=3 SV=1	2.12604	Condition 1	Condition 2	6.27e-05	5.49154	57195.5	53526.4	51323.7	25845.9	26406.3	23967.4	57335.8	54153.3	49201.9	25845.9	25775.3	22972.7	2	2	2	0	0	0
50.71_1865.9031n	Yes	1	#11280	2	50.7145	1865.9	5.524	QQQQPQQLGQCVSQPL	[11] Carbamidomethyl C	P10385	Glutenin_ low molecular weight subunit OS=Triticum aestivum OX=4565 PE=3 SV=1	96.4507	Condition 2	Condition 1	0.0141084	88.6792	22.6548	29.2576	0	1831.93	1547.74	1627.32	22.7104	29.6002	0	1831.93	1510.75	1559.78	0	0	0	1	0	1
40.56_887.4161n	Yes	1	#17952	1	40.5611	887.416	5.6826	GQCVSQPL	[3] Carbamidomethyl C	P10385	Glutenin_ low molecular weight subunit OS=Triticum aestivum OX=4565 PE=3 SV=1	7.53433	Condition 2	Condition 1	1.4e-05	12.944	39.6267	43.0428	33.1969	303.027	286.014	283.935	39.7239	43.5469	31.8244	303.027	279.179	272.15	0	0	0	1	0	1
41.81_2042.9756n	Yes	1	#25369	3	41.8066	2042.98	5.2986	SQQQQPPFSQQQQQPPF	[6] Hydroxyproline	P10385	Glutenin_ low molecular weight subunit OS=Triticum aestivum OX=4565 PE=3 SV=1	3.72657	Condition 1	Condition 2	0.149213	124.497	80.1173	54.5721	39.9232	37.3974	0	9.45867	80.3137	55.2113	38.2727	37.3974	0	9.0661	0	1	1	0	0	0
52.88_1009.4965n	Yes	1	#11712	1	52.8786	1009.5	5.9865	YETTTSVPL		P10385	Glutenin_ low molecular weight subunit OS=Triticum aestivum OX=4565 PE=3 SV=1	1.14722	Condition 1	Condition 2	0.124196	12.0438	185.346	199.176	233.535	178.888	179.497	180.357	185.8	201.508	223.88	178.888	175.207	172.871	1	1	0	1	1	1
39.24_1013.5366n	Yes	1	#9987	2	39.2369	1013.54	5.225	QQQQPQQL	[N-term] Pyroglutamic acid	P10385	Glutenin_ low molecular weight subunit OS=Triticum aestivum OX=4565 PE=3 SV=1	2.50818	Condition 2	Condition 1	0.00486732	26.7378	219.78	264.611	231.297	776.609	551.259	467.207	220.319	267.71	221.735	776.609	538.086	447.816	1	0	0	0	0	1
41.81_2026.9565n	Yes	1	#21463	3	41.8066	2026.96	5.0694	SQQQQPPFSQQQQQPPF		P10385	Glutenin_ low molecular weight subunit OS=Triticum aestivum OX=4565 PE=3 SV=1	8.86238	Condition 1	Condition 2	0.000794896	33.6921	222.838	110.461	167.019	14.6797	21.555	20.2193	223.384	111.754	160.114	14.6797	21.0399	19.3801	0	1	1	0	0	0
56.69_2010.9616n	Yes	1	#15346	2	56.6919	2010.96	5.8478	SQQQQQPPFAQQQQPPF		P10385	Glutenin_ low molecular weight subunit OS=Triticum aestivum OX=4565 PE=3 SV=1	1.12076	Condition 2	Condition 1	0.3437	15.6412	410.522	428.121	390.69	505.304	495.993	376.49	411.529	433.135	374.538	505.304	484.14	360.864	1	0	0	1	1	1
44.09_972.4681n	Yes	1	#9045	2	44.0914	972.468	5.3749	TQQQQPPF		P10385	Glutenin_ low molecular weight subunit OS=Triticum aestivum OX=4565 PE=3 SV=1	1.74873	Condition 2	Condition 1	0.00274357	14.2117	413.094	482.928	550.098	840.664	811.56	876.651	414.107	488.584	527.356	840.664	792.166	840.267	1	1	0	0	1	0
38.93_1514.7488n	Yes	1	#5153	3	38.9284	1514.75	5.1662	RTLPTMCNVNVPL	[7] Carbamidomethyl C|[8] Deamidation N	P10385	Glutenin_ low molecular weight subunit OS=Triticum aestivum OX=4565 PE=3 SV=1	3.65719	Condition 2	Condition 1	1.2e-05	6.72234	457.696	505.872	521.554	1738.85	1779.03	1913.5	458.819	511.797	499.992	1738.85	1736.52	1834.08	0	1	0	1	0	0
33.90_974.4508n	Yes	1	#12002	2	33.9045	974.451	5.2932	SQQQQPPY		P10385	Glutenin_ low molecular weight subunit OS=Triticum aestivum OX=4565 PE=3 SV=1	1.00247	Condition 1	Condition 2	0.959046	14.6517	546.205	724.391	697.868	672.977	652.027	638.606	547.545	732.875	669.017	672.977	636.446	612.102	0	1	1	0	1	0
43.51_1012.5417n	Yes	1	#8031	2	43.5081	1012.54	5.003	LQQQRPPF		P10385	Glutenin_ low molecular weight subunit OS=Triticum aestivum OX=4565 PE=3 SV=1	1.46113	Condition 2	Condition 1	0.0089554	10.5907	574.764	525.397	624.3	746.058	850.62	922.983	576.173	531.551	598.489	746.058	830.293	884.676	1	1	1	0	0	1
37.12_2026.9476n	Yes	1	#9676	3	37.1245	2026.95	5.0533	SQQQQQPPFAQQQQPPF	[15] Hydroxyproline	P10385	Glutenin_ low molecular weight subunit OS=Triticum aestivum OX=4565 PE=3 SV=1	1.02335	Condition 2	Condition 1	0.960387	22.9806	581.567	562.034	705.139	724.957	463.767	703.193	582.994	568.616	675.986	724.957	452.684	674.008	1	1	0	0	0	0
56.71_2010.9550n	Yes	1	#10757	3	56.709	2010.95	5.8478	SQQQQQPPFAQQQQPPF		P10385	Glutenin_ low molecular weight subunit OS=Triticum aestivum OX=4565 PE=3 SV=1	1.25356	Condition 2	Condition 1	0.00123564	3.61694	776.54	731.867	769.667	938.371	991.041	926.292	778.444	740.439	737.847	938.371	967.358	887.847	1	1	1	1	1	1
49.12_2565.2089n	Yes	1	#8445	3	49.1168	2565.21	5.2129	TQQQQPPFSQQPPISQQQQPPF	[2] Deamidation Q|[3] Deamidation Q	P10385	Glutenin_ low molecular weight subunit OS=Triticum aestivum OX=4565 PE=3 SV=1	1.55258	Condition 2	Condition 1	0.000431749	6.29719	1248.37	1372.91	1221.81	1911.46	2009.51	2045.73	1251.43	1388.99	1171.3	1911.46	1961.48	1960.82	0	1	0	0	1	0
60.25_2829.3133n	Yes	1	#6965	3	60.2543	2829.31	6.109	SQQQQPPFSQQQQPPFSQQQQSPF		P10385	Glutenin_ low molecular weight subunit OS=Triticum aestivum OX=4565 PE=3 SV=1	2.62783	Condition 2	Condition 1	1.88e-07	1.85035	1605.7	1564.63	1621.99	4141.18	4210.32	4241.86	1609.64	1582.95	1554.93	4141.18	4109.71	4065.81	0	1	1	1	1	1
59.46_1623.8724n	Yes	1	#5344	2	59.4556	1623.87	5.0548	AHQIAQLEVMTSIAL		P10385	Glutenin_ low molecular weight subunit OS=Triticum aestivum OX=4565 PE=3 SV=1	1.24638	Condition 2	Condition 1	0.00328877	5.05917	1894.5	2026.06	1944.98	2416.71	2569.03	2324.95	1899.15	2049.79	1864.57	2416.71	2507.64	2228.46	1	1	1	1	1	0
54.54_1888.8690n	Yes	1	#7426	2	54.5352	1888.87	5.8586	SQQQQPPFSQQQQSPF		P10385	Glutenin_ low molecular weight subunit OS=Triticum aestivum OX=4565 PE=3 SV=1	1.11953	Condition 1	Condition 2	0.303253	13.641	2008.7	1751.91	1528.11	1520.39	1477.06	1726.6	2013.62	1772.43	1464.94	1520.39	1441.76	1654.94	1	1	1	1	1	1
56.08_1898.8836n	Yes	1	#7197	2	56.0815	1898.88	6.107	SQQQQPPFSQQQQPPF		P10385	Glutenin_ low molecular weight subunit OS=Triticum aestivum OX=4565 PE=3 SV=1	1.35294	Condition 1	Condition 2	7.39e-05	2.9623	2041.16	2023.78	2003.68	1508.95	1445.63	1530.93	2046.16	2047.49	1920.84	1508.95	1411.08	1467.39	1	1	1	1	0	1
43.65_1086.5264n	Yes	1	#6742	2	43.6457	1086.53	5.3193	SQQQQQPPF		P10385	Glutenin_ low molecular weight subunit OS=Triticum aestivum OX=4565 PE=3 SV=1	1.18687	Condition 2	Condition 1	0.009569	4.72778	2132.86	2294.11	2301.78	2565.48	2804.39	2616.31	2138.09	2320.98	2206.62	2565.48	2737.38	2507.72	1	1	0	1	1	1
59.27_1889.8857n	Yes	1	#2149	3	59.267	1889.89	5.1752	SQQQQPPFSQQQQSPF	[4] Deamidation Q	P10385	Glutenin_ low molecular weight subunit OS=Triticum aestivum OX=4565 PE=3 SV=1	1.45295	Condition 1	Condition 2	0.0923665	24.912	3378.32	2197.4	2300.62	1593.1	2150.37	1677.44	3386.61	2223.13	2205.51	1593.1	2098.98	1607.82	1	1	0	0	0	0
51.57_1608.7903n	Yes	1	#3104	2	51.5717	1608.79	6.4157	SQQPPISQQQQPPF		P10385	Glutenin_ low molecular weight subunit OS=Triticum aestivum OX=4565 PE=3 SV=1	1.18836	Condition 1	Condition 2	0.0683254	11.9622	3679.65	3015.84	3003.87	2778.06	2683.28	2700.62	3688.68	3051.17	2879.68	2778.06	2619.16	2588.53	1	1	1	1	1	1
57.00_1775.8523n	Yes	1	#2004	3	57.0004	1775.85	5.2005	LQQQCIPVAMQRCL	[5] Carbamidomethyl C|[7] Hydroxyproline|[10] Oxidation M|[13] Carbamidomethyl C	P10385	Glutenin_ low molecular weight subunit OS=Triticum aestivum OX=4565 PE=3 SV=1	2.0057	Condition 1	Condition 2	1.55e-07	1.28317	8212.63	8263.67	8417.2	4174.85	4106.81	4129.71	8232.77	8360.46	8069.21	4174.85	4008.67	3958.32	1	0	0	0	0	1
56.12_2463.1852n	Yes	1	#93	3	56.1157	2463.19	5.3976	LQQQCIPVAMQRCLARSQML	[2] Deamidation Q|[5] Carbamidomethyl C|[10] Oxidation M|[13] Carbamidomethyl C|[19] Oxidation M	P10385	Glutenin_ low molecular weight subunit OS=Triticum aestivum OX=4565 PE=3 SV=1	1.01538	Condition 1	Condition 2	0.645439	4.26428	42218.8	41130.2	38818.4	38853.3	40274.4	41189.1	42322.4	41611.9	37213.5	38853.3	39312	39479.6	1	0	0	0	1	0
61.48_1053.5259n	No	1	#21550	2	61.4816	1053.53	5.4481	GQQPQQQQL		P10385	Glutenin_ low molecular weight subunit OS=Triticum aestivum OX=4565 PE=3 SV=1	2.42881	Condition 1	Condition 2	0.27571	98.8343	45.1982	101.877	118.485	0	72.0265	37.3112	45.3091	103.071	113.587	0	70.3053	35.7626	1	1	0	0	0	0
32.42_1053.5224n	No	1	#10237	2	32.4194	1053.52	6.3291	GQQPQQQQL		P10385	Glutenin_ low molecular weight subunit OS=Triticum aestivum OX=4565 PE=3 SV=1	14.4311	Condition 2	Condition 1	0.000314265	43.2947	134.387	115.008	247.852	2413.93	2439.62	2322.28	134.716	116.355	237.605	2413.93	2381.32	2225.89	0	0	0	1	1	0
51.30_1053.5152n	No	1	#11869	2	51.2974	1053.52	5.9594	GQQPQQQQL		P10385	Glutenin_ low molecular weight subunit OS=Triticum aestivum OX=4565 PE=3 SV=1	1.02404	Condition 1	Condition 2	0.881839	19.6911	199.523	219.279	285.855	221.72	188.521	277.875	200.013	221.848	274.037	221.72	184.016	266.342	0	0	1	0	0	1
42.17_704.3688n	No	1	#5619	1	42.1666	704.369	5.0335	ARSQML		P10385	Glutenin_ low molecular weight subunit OS=Triticum aestivum OX=4565 PE=3 SV=1	1.24367	Condition 2	Condition 1	0.00390763	5.25972	538.652	505.579	507.467	619.305	681.971	628.527	539.973	511.501	486.487	619.305	665.674	602.441	0	0	0	1	1	0
51.98_1132.5769n	No	1	#1421	2	51.9766	1132.58	7.4811	QQLNPCKVF	[6] Carbamidomethyl C	P10385	Glutenin_ low molecular weight subunit OS=Triticum aestivum OX=4565 PE=3 SV=1	10.3262	Condition 2	Condition 1	3.54e-07	5.23417	1533.53	1701.68	1639.93	17179.3	16122.3	17040	1537.29	1721.61	1572.13	17179.3	15737.1	16332.7	1	1	1	1	1	1
58.47_1865.8949n	No	1	#2210	2	58.4681	1865.89	5.165	QQQQPQQLGQCVSQPL	[11] Carbamidomethyl C	P10385	Glutenin_ low molecular weight subunit OS=Triticum aestivum OX=4565 PE=3 SV=1	1.75423	Condition 1	Condition 2	0.000610232	9.93007	6133.36	5185.16	5188.8	3102.48	3211.19	3096.32	6148.4	5245.88	4974.28	3102.48	3134.45	2967.81	0	0	0	1	1	1
52.22_1245.6749n	No	1	#757	2	52.2167	1245.67	6.0261	QQLNPCKVFL	[6] Carbamidomethyl C	P10385	Glutenin_ low molecular weight subunit OS=Triticum aestivum OX=4565 PE=3 SV=1	1.10997	Condition 2	Condition 1	0.000106608	0.974875	26113.8	26170.1	26443.2	28901.4	29036.7	29446.7	26177.8	26476.6	25350	28901.4	28342.8	28224.6	0	1	0	1	0	0
42.10_1874.9409n	Yes	2	#8840,#3445	2,3	42.098	1874.94	5.9103	QQQPLPPQQTFPQQPL	[14] Deamidation Q	P10386	Glutenin_ low molecular weight subunit 1D1 OS=Triticum aestivum OX=4565 PE=2 SV=1	1.30356	Condition 2	Condition 1	0.000457195	4.18768	5139.22	5411.78	4983.36	6837.7	6748.52	6663.71	5151.83	5475.16	4777.33	6837.7	6587.25	6387.14	2	0	2	2	2	0
57.51_924.5072n	Yes	2	#9808,#1845	1,2	57.5061	924.507	6.3879	VLPQQPPF		P10386	Glutenin_ low molecular weight subunit 1D1 OS=Triticum aestivum OX=4565 PE=2 SV=1	1.52346	Condition 1	Condition 2	0.000117489	3.78454	7392.9	7517.23	6988.84	4674.36	4743.86	4956.29	7411.02	7605.27	6699.9	4674.36	4630.49	4750.59	2	2	2	2	2	2
45.01_2220.0981n	Yes	1	#13832	3	45.0104	2220.1	5.8833	SQQQPILPQQPPFSQQQQL	[2] Deamidation Q	P10386	Glutenin_ low molecular weight subunit 1D1 OS=Triticum aestivum OX=4565 PE=2 SV=1	75.9393	Condition 2	Condition 1	0.0117185	120.612	28.3621	8.00774	0	926.091	948.292	887.519	28.4317	8.10153	0	926.091	925.631	850.684	0	0	0	1	0	1
49.44_2072.0708n	Yes	1	#3768	4	49.4425	2072.07	---	LAVAATSAIAQMETRCIPGL	[16] Carbamidomethyl C	P10386	Glutenin_ low molecular weight subunit 1D1 OS=Triticum aestivum OX=4565 PE=2 SV=1	33.395	Condition 2	Condition 1	7.62e-05	31.469	132.995	89.2065	171.82	3616.03	4880.01	4662.28	133.321	90.2513	164.716	3616.03	4763.4	4468.78	0	0	0	0	0	0
66.31_2944.4786n	Yes	1	#15969	3	66.3144	2944.48	6.0357	QQQPPFSQQQPILPQQPPFSQQQQL		P10386	Glutenin_ low molecular weight subunit 1D1 OS=Triticum aestivum OX=4565 PE=2 SV=1	3.54528	Condition 2	Condition 1	0.000329154	18.5613	278.739	404.046	332.937	1207.82	1257.44	1135.75	279.422	408.779	319.172	1207.82	1227.39	1088.62	0	1	1	0	1	1
37.23_849.3933n	Yes	1	#8404	2	37.2273	849.393	5.0958	FPQQPSF		P10386	Glutenin_ low molecular weight subunit 1D1 OS=Triticum aestivum OX=4565 PE=2 SV=1	1.17374	Condition 2	Condition 1	0.442196	25.6907	344.586	357.231	362.695	298.551	507.346	443.559	345.431	361.415	347.7	298.551	495.222	425.15	0	1	1	0	0	0
39.85_1964.9494n	Yes	1	#9302	4	39.8476	1964.95	5.8573	FSQQQQQQLFPQQPSF		P10386	Glutenin_ low molecular weight subunit 1D1 OS=Triticum aestivum OX=4565 PE=2 SV=1	2.6029	Condition 1	Condition 2	0.000666169	12.3901	581.568	643.312	502.107	203.548	252.733	207.205	582.994	650.847	481.349	203.548	246.693	198.606	1	0	0	0	0	1
61.85_2219.1300n	Yes	1	#11898	3	61.8518	2219.13	6.4808	SQQQPILPQQPPFSQQQQL		P10386	Glutenin_ low molecular weight subunit 1D1 OS=Triticum aestivum OX=4565 PE=2 SV=1	1.86521	Condition 2	Condition 1	0.001066	9.86328	846.617	849.916	743.195	1612.71	1593.42	1344.47	848.693	859.87	712.469	1612.71	1555.34	1288.67	1	1	1	1	1	1
44.01_743.3620n	Yes	1	#7023	2	44.0057	743.362	6.7043	QQQPPF		P10386	Glutenin_ low molecular weight subunit 1D1 OS=Triticum aestivum OX=4565 PE=2 SV=1	1.19507	Condition 1	Condition 2	0.0426256	9.46627	928.685	1094.36	1104.42	900.78	840.345	875.838	930.963	1107.18	1058.76	900.78	820.263	839.488	1	1	1	1	1	1
68.49_2232.1276n	Yes	1	#11187	3	68.4941	2232.13	5.8513	QQQPPFSQQQPILPQQPPF		P10386	Glutenin_ low molecular weight subunit 1D1 OS=Triticum aestivum OX=4565 PE=2 SV=1	1.49376	Condition 1	Condition 2	0.00372804	10.5689	1041.29	994.416	966.987	712.362	709.497	588.296	1043.85	1006.06	927.009	712.362	692.542	563.879	1	1	1	1	1	1
52.39_1958.9676n	Yes	1	#10772	2	52.3881	1958.97	5.5519	AVAATSAIAQMETRCIPGL	[15] Carbamidomethyl C	P10386	Glutenin_ low molecular weight subunit 1D1 OS=Triticum aestivum OX=4565 PE=2 SV=1	1.04909	Condition 1	Condition 2	0.0797744	2.89905	1731.29	1661.14	1693.93	1618.18	1661.89	1568.26	1735.53	1680.6	1623.89	1618.18	1622.18	1503.17	1	1	1	1	1	1
63.27_1506.7846n	Yes	1	#4386	2	63.2674	1506.78	6.8817	SQQQPILPQQPPF		P10386	Glutenin_ low molecular weight subunit 1D1 OS=Triticum aestivum OX=4565 PE=2 SV=1	1.28214	Condition 1	Condition 2	3.89e-06	1.05474	2732.64	2698.03	2676.11	2119.43	2109.87	2093.55	2739.34	2729.63	2565.47	2119.43	2059.45	2006.66	1	1	1	1	1	1
50.38_1818.8435n	Yes	1	#2766	2	50.3787	1818.84	5.6051	SQQQQQQLFPQQPSF	[4] Deamidation Q	P10386	Glutenin_ low molecular weight subunit 1D1 OS=Triticum aestivum OX=4565 PE=2 SV=1	1.06359	Condition 1	Condition 2	0.234727	7.16081	4919.83	4301.06	4432.98	4274.7	4385.08	4177.69	4931.89	4351.43	4249.7	4274.7	4280.29	4004.31	0	1	1	0	0	0
67.56_1447.8426n	Yes	1	#1011	2	67.5586	1447.84	7.57	VQQQIPVVQPSIL		P10386	Glutenin_ low molecular weight subunit 1D1 OS=Triticum aestivum OX=4565 PE=2 SV=1	1.0219	Condition 2	Condition 1	0.471495	4.23413	9613.62	9645.8	9317.9	10184.5	9643.11	9375.48	9637.19	9758.77	8932.67	10184.5	9412.67	8986.36	1	1	1	1	1	1
58.54_1873.9670n	Yes	1	#4253	2	58.5367	1873.97	6.0982	QQQPLPPQQTFPQQPL		P10386	Glutenin_ low molecular weight subunit 1D1 OS=Triticum aestivum OX=4565 PE=2 SV=1	1.19639	Condition 1	Condition 2	0.0248533	8.79797	19124.6	16944.9	16169.9	14632.3	14680.1	14351.7	19171.5	17143.3	15501.3	14632.3	14329.3	13756.1	1	1	1	1	1	1
61.48_1053.5259n	No	1	#21550	2	61.4816	1053.53	5.4481	GQQPQQQQL		P10386	Glutenin_ low molecular weight subunit 1D1 OS=Triticum aestivum OX=4565 PE=2 SV=1	2.42881	Condition 1	Condition 2	0.27571	98.8343	45.1982	101.877	118.485	0	72.0265	37.3112	45.3091	103.071	113.587	0	70.3053	35.7626	1	1	0	0	0	0
42.76_2778.3114n	No	1	#5862	3	42.7606	2778.31	6.6709	GQCVSQPQQQSQQQLGQQPQQQQL	[3] Carbamidomethyl C	P10386	Glutenin_ low molecular weight subunit 1D1 OS=Triticum aestivum OX=4565 PE=2 SV=1	126.956	Condition 2	Condition 1	0.0163512	88.1445	48.2818	0	38.7569	3599.46	3932.7	3517.89	48.4002	0	37.1545	3599.46	3838.72	3371.88	0	0	0	1	1	1
32.42_1053.5224n	No	1	#10237	2	32.4194	1053.52	6.3291	GQQPQQQQL		P10386	Glutenin_ low molecular weight subunit 1D1 OS=Triticum aestivum OX=4565 PE=2 SV=1	14.4311	Condition 2	Condition 1	0.000314265	43.2947	134.387	115.008	247.852	2413.93	2439.62	2322.28	134.716	116.355	237.605	2413.93	2381.32	2225.89	0	0	0	1	1	0
40.31_1654.8135n	No	2	#18019,#23204	2,3	40.3105	1654.81	5.3583	LQQQCSPVAMPQRL	[5] Carbamidomethyl C	P10386	Glutenin_ low molecular weight subunit 1D1 OS=Triticum aestivum OX=4565 PE=2 SV=1	1.35598	Condition 2	Condition 1	0.00461355	6.58469	158.465	173.752	153.25	233.949	205.3	219.035	158.854	175.787	146.914	233.949	200.394	209.944	1	0	1	0	1	0
51.30_1053.5152n	No	1	#11869	2	51.2974	1053.52	5.9594	GQQPQQQQL		P10386	Glutenin_ low molecular weight subunit 1D1 OS=Triticum aestivum OX=4565 PE=2 SV=1	1.02404	Condition 1	Condition 2	0.881839	19.6911	199.523	219.279	285.855	221.72	188.521	277.875	200.013	221.848	274.037	221.72	184.016	266.342	0	0	1	0	0	1
36.83_1742.8022n	No	1	#3735	2	36.833	1742.8	7.3901	GQCVSQPQQQSQQQL	[3] Carbamidomethyl C	P10386	Glutenin_ low molecular weight subunit 1D1 OS=Triticum aestivum OX=4565 PE=2 SV=1	10.485	Condition 2	Condition 1	4.94e-06	10.9553	419.589	336.707	386.867	3966.28	3801.61	4218.22	420.618	340.65	370.873	3966.28	3710.76	4043.15	0	0	0	1	1	1
49.44_3282.5245n	No	1	#15495	4	49.4425	3282.52	5.4413	GQCVSQPQQQSQQQLGQQPQQQQLAQGTF	[3] Carbamidomethyl C	P10386	Glutenin_ low molecular weight subunit 1D1 OS=Triticum aestivum OX=4565 PE=2 SV=1	11.7089	Condition 1	Condition 2	0.000759055	43.3056	519.351	617.962	472.751	66.5461	26.9766	43.9854	520.625	625.2	453.206	66.5461	26.3319	42.1599	1	1	0	0	0	0
42.17_704.3688n	No	1	#5619	1	42.1666	704.369	5.0335	ARSQML		P10386	Glutenin_ low molecular weight subunit 1D1 OS=Triticum aestivum OX=4565 PE=2 SV=1	1.24367	Condition 2	Condition 1	0.00390763	5.25972	538.652	505.579	507.467	619.305	681.971	628.527	539.973	511.501	486.487	619.305	665.674	602.441	0	0	0	1	1	0
56.76_1743.7816n	No	1	#8888	2	56.7604	1743.78	5.4703	GQCVSQPQQQSQQQL	[3] Carbamidomethyl C|[9] Deamidation Q	P10386	Glutenin_ low molecular weight subunit 1D1 OS=Triticum aestivum OX=4565 PE=2 SV=1	3.52039	Condition 1	Condition 2	7.32e-07	3.86458	1030.96	1113.54	1080.06	307.991	300.987	306.99	1033.49	1126.59	1035.41	307.991	293.794	294.249	1	1	0	0	0	0
46.86_907.4772n	No	2	#7473,#2666	1,2	46.8581	907.477	6.6435	RTTTSVPF		P10386	Glutenin_ low molecular weight subunit 1D1 OS=Triticum aestivum OX=4565 PE=2 SV=1	2.87302	Condition 2	Condition 1	1.14e-05	5.20525	1285.98	1361.45	1227.34	3623.85	3607.56	3900.87	1289.13	1377.39	1176.59	3623.85	3521.35	3738.97	1	2	2	2	2	2
51.98_1132.5769n	No	1	#1421	2	51.9766	1132.58	7.4811	QQLNPCKVF	[6] Carbamidomethyl C	P10386	Glutenin_ low molecular weight subunit 1D1 OS=Triticum aestivum OX=4565 PE=2 SV=1	10.3262	Condition 2	Condition 1	3.54e-07	5.23417	1533.53	1701.68	1639.93	17179.3	16122.3	17040	1537.29	1721.61	1572.13	17179.3	15737.1	16332.7	1	1	1	1	1	1
48.30_1046.5927n	No	1	#1587	2	48.3004	1046.59	7.2758	LQPHQIAQL		P10386	Glutenin_ low molecular weight subunit 1D1 OS=Triticum aestivum OX=4565 PE=2 SV=1	4.13715	Condition 2	Condition 1	1.32e-05	8.55766	1833.09	1891.29	2001.53	8675.71	7538.52	7474.68	1837.58	1913.44	1918.78	8675.71	7358.37	7164.46	1	1	1	1	1	1
59.44_1907.9833n	No	1	#5330	2	59.4384	1907.98	5.6674	LQPHQIAQLEVMTSIAL	[5] Deamidation Q|[12] Oxidation M	P10386	Glutenin_ low molecular weight subunit 1D1 OS=Triticum aestivum OX=4565 PE=2 SV=1	1.06366	Condition 2	Condition 1	0.0362573	3.30435	2162.59	2038.91	2157.71	2236.46	2278.21	2249.39	2167.89	2062.78	2068.51	2236.46	2223.77	2156.03	0	0	0	0	1	1
71.54_1668.8590n	No	1	#6880	2	71.5414	1668.86	5.3193	RTTTSVPFGVGTGVGAY		P10386	Glutenin_ low molecular weight subunit 1D1 OS=Triticum aestivum OX=4565 PE=2 SV=1	6.74453	Condition 1	Condition 2	0.00251522	54.7328	3012.59	3376.87	2786.81	739.873	321.02	299.656	3019.97	3416.42	2671.6	739.873	313.349	287.219	0	1	1	0	0	0
63.35_1559.7233n	No	1	#6082	2	63.3531	1559.72	5.7537	GQQPQQQQLAQGTF	[8] Deamidation Q|[11] Deamidation Q	P10386	Glutenin_ low molecular weight subunit 1D1 OS=Triticum aestivum OX=4565 PE=2 SV=1	1.34602	Condition 1	Condition 2	0.00010166	3.22128	3540.74	3740.37	3537.63	2681.59	2702.44	2653.53	3549.42	3784.18	3391.38	2681.59	2637.86	2543.4	0	0	0	0	1	1
56.12_1086.5364n	No	1	#2114	2	56.1157	1086.54	6.5523	YRTTTSVPF	[8] Hydroxyproline	P10386	Glutenin_ low molecular weight subunit 1D1 OS=Triticum aestivum OX=4565 PE=2 SV=1	1.09696	Condition 1	Condition 2	0.0215106	4.25025	3654.63	3530.08	3357.23	3183.71	3192.8	3233.67	3663.6	3571.42	3218.43	3183.71	3116.5	3099.47	0	0	1	0	1	0
31.47_933.5079n	No	1	#1490	2	31.4657	933.508	5.993	QPHQIAQL		P10386	Glutenin_ low molecular weight subunit 1D1 OS=Triticum aestivum OX=4565 PE=2 SV=1	1.1173	Condition 1	Condition 2	0.016643	4.18749	4152.71	4487.04	4447.46	3805.14	3927.09	3980.99	4162.89	4539.59	4263.59	3805.14	3833.25	3815.76	1	1	1	1	1	1
44.37_1541.7529n	No	1	#1868	2	44.3657	1541.75	5.2872	QQQCSPVAMPQRL	[4] Carbamidomethyl C	P10386	Glutenin_ low molecular weight subunit 1D1 OS=Triticum aestivum OX=4565 PE=2 SV=1	1.19396	Condition 2	Condition 1	0.0918636	13.5603	4203.01	4440.16	4328.84	4641.99	4887.57	5958.56	4213.32	4492.16	4149.88	4641.99	4770.78	5711.26	1	1	1	0	1	0
43.84_830.3959n	No	2	#2756,#1611	1,2	43.8428	830.396	7.2571	SQQQPPF		P10386	Glutenin_ low molecular weight subunit 1D1 OS=Triticum aestivum OX=4565 PE=2 SV=1	1.25905	Condition 1	Condition 2	0.00123527	4.28668	9560.7	10317.9	10296.7	7785.57	8063.56	8117.66	9584.14	10438.7	9870.99	7785.57	7870.86	7780.75	2	2	0	2	2	2
49.95_1086.5321n	No	1	#453	2	49.9501	1086.53	6.0578	YRTTTSVPF	[8] Hydroxyproline	P10386	Glutenin_ low molecular weight subunit 1D1 OS=Triticum aestivum OX=4565 PE=2 SV=1	1.6239	Condition 1	Condition 2	0.000279078	5.54655	10597.4	10650.7	11677.4	6424.46	6877.16	6973.98	10623.4	10775.4	11194.6	6424.46	6712.81	6684.53	1	1	0	0	0	0
29.94_1670.8154n	No	1	#752	2	29.9359	1670.82	5.3887	LQQQCSPVAMPQRL	[5] Carbamidomethyl C|[10] Oxidation M	P10386	Glutenin_ low molecular weight subunit 1D1 OS=Triticum aestivum OX=4565 PE=2 SV=1	1.27532	Condition 2	Condition 1	0.00704412	6.05929	18076.8	18672.5	20302.7	25439.5	24570.7	22749.3	18121.1	18891.2	19463.3	25439.5	23983.5	21805.1	1	0	1	0	0	0
46.02_2359.1468n	No	1	#2080	3	46.0158	2359.15	6.2732	LQQQCSPVAMPQRLARSQML	[5] Carbamidomethyl C|[10] Oxidation M|[12] Deamidation Q|[18] Deamidation Q	P10386	Glutenin_ low molecular weight subunit 1D1 OS=Triticum aestivum OX=4565 PE=2 SV=1	1.04025	Condition 2	Condition 1	0.0942674	2.84545	18839.4	18064.6	19081	19455	19641.3	19142.2	18885.6	18276.2	18292.1	19455	19172	18347.7	0	0	0	1	1	0
52.22_1245.6749n	No	1	#757	2	52.2167	1245.67	6.0261	QQLNPCKVFL	[6] Carbamidomethyl C	P10386	Glutenin_ low molecular weight subunit 1D1 OS=Triticum aestivum OX=4565 PE=2 SV=1	1.10997	Condition 2	Condition 1	0.000106608	0.974875	26113.8	26170.1	26443.2	28901.4	29036.7	29446.7	26177.8	26476.6	25350	28901.4	28342.8	28224.6	0	1	0	1	0	0
36.49_2441.1658n	Yes	2	#11390,#5306	3,4	36.4901	2441.17	5.2454	YYPTSLQQPGQGQQIGKGQQGY	[3] Hydroxyproline	P10387	Glutenin_ high molecular weight subunit DY10 OS=Triticum aestivum OX=4565 GN=GLU-D1-2B PE=3 SV=1	1.12362	Condition 1	Condition 2	0.723923	31.5952	1606.23	3095.75	2817.15	2199.33	2320.4	2172.17	1610.17	3132	2700.68	2199.33	2264.95	2082.02	2	0	0	0	0	2
55.04_2262.0658n	Yes	1	#14601	3	55.0422	2262.07	5.4622	QQPGQGQQIGKGQQGYYPTSL		P10387	Glutenin_ high molecular weight subunit DY10 OS=Triticum aestivum OX=4565 GN=GLU-D1-2B PE=3 SV=1	19.4547	Condition 2	Condition 1	0.000202493	36.2521	43.2638	31.127	20.3747	602.905	703.841	536.884	43.3699	31.4915	19.5324	602.905	687.022	514.602	0	0	0	0	1	1
57.19_1667.7992n	Yes	1	#9239	2	57.189	1667.8	5.8689	QQPGQGQQGYYPTSL	[N-term] Pyroglutamic acid	P10387	Glutenin_ high molecular weight subunit DY10 OS=Triticum aestivum OX=4565 GN=GLU-D1-2B PE=3 SV=1	4.97815	Condition 2	Condition 1	2.89e-05	11.9339	418.547	329.466	386.675	1786.39	1964.83	1897.42	419.574	333.324	370.688	1786.39	1917.87	1818.67	0	0	0	1	0	1
28.08_1083.5262n	Yes	1	#9068	2	28.0805	1083.53	5.6642	GQGQQPRQW		P10387	Glutenin_ high molecular weight subunit DY10 OS=Triticum aestivum OX=4565 GN=GLU-D1-2B PE=3 SV=1	1.13917	Condition 1	Condition 2	0.208436	13.521	444.02	494.969	579.516	416.983	462.891	453.123	445.109	500.766	555.557	416.983	451.83	434.317	1	0	1	0	1	1
47.67_1650.7812n	Yes	1	#10302	2	47.6661	1650.78	5.417	YPTSLQQPGQGQQGY		P10387	Glutenin_ high molecular weight subunit DY10 OS=Triticum aestivum OX=4565 GN=GLU-D1-2B PE=3 SV=1	5.94406	Condition 2	Condition 1	5.99e-05	17.9596	471.29	661.466	519.279	3258.06	3335.74	3225.98	472.445	669.213	497.811	3258.06	3256.03	3092.09	1	1	1	1	1	0
25.61_1624.7460n	Yes	1	#9303	3	25.6077	1624.75	5.3335	QQPGQGQQGHYPTSL		P10387	Glutenin_ high molecular weight subunit DY10 OS=Triticum aestivum OX=4565 GN=GLU-D1-2B PE=3 SV=1	1.11999	Condition 2	Condition 1	0.35108	16.2532	598.926	659.146	667.723	605.571	712.311	838.994	600.394	666.866	640.118	605.571	695.289	804.173	0	1	0	1	1	1
34.67_1089.4851n	Yes	1	#6045	2	34.6693	1089.49	5.4613	QQPGQGQQGY		P10387	Glutenin_ high molecular weight subunit DY10 OS=Triticum aestivum OX=4565 GN=GLU-D1-2B PE=3 SV=1	3.67281	Condition 2	Condition 1	0.000173523	16.6831	621.103	867.408	730.594	2760.83	2667.43	2722.1	622.626	877.567	700.389	2760.83	2603.69	2609.12	1	0	0	1	1	1
42.17_1326.6190n	Yes	1	#11105	2	42.1666	1326.62	5.1574	YPGVTSPRQGSY	[7] Hydroxyproline	P10387	Glutenin_ high molecular weight subunit DY10 OS=Triticum aestivum OX=4565 GN=GLU-D1-2B PE=3 SV=1	1.0864	Condition 2	Condition 1	0.429108	14.1859	987.913	936.368	885.947	1166.53	878.263	1008.23	990.336	947.334	849.319	1166.53	857.276	966.383	0	0	1	0	1	0
64.75_2696.2503n	Yes	1	#8827	3	64.7517	2696.25	5.2834	GQGQQPRQWQQSGQGQQGHYPTSL	[21] Hydroxyproline	P10387	Glutenin_ high molecular weight subunit DY10 OS=Triticum aestivum OX=4565 GN=GLU-D1-2B PE=3 SV=1	2.11561	Condition 2	Condition 1	5.93e-06	3.79846	1880.3	1859.19	1994.15	4034.27	4113.51	3982.37	1884.91	1880.97	1911.71	4034.27	4015.21	3817.09	1	0	1	0	0	1
49.08_2537.1345n	Yes	1	#2241	2	49.0825	2537.13	5.9045	WGTSSQTVQGYYPGVTSPRQGSY	[13] Hydroxyproline|[18] Hydroxyproline	P10387	Glutenin_ high molecular weight subunit DY10 OS=Triticum aestivum OX=4565 GN=GLU-D1-2B PE=3 SV=1	2.00845	Condition 2	Condition 1	6.49e-05	6.52252	2982.54	3391.33	3133.54	6555.87	6253.27	6285.98	2989.86	3431.05	3003.99	6555.87	6103.84	6025.09	0	1	0	1	1	1
40.12_2823.2727n	No	1	#14114	3	40.1219	2823.27	6.2071	QQSGQGQQGHYPTSLQQPGQGQQGHY		P10387	Glutenin_ high molecular weight subunit DY10 OS=Triticum aestivum OX=4565 GN=GLU-D1-2B PE=3 SV=1	72.9427	Condition 2	Condition 1	0.0123499	86.8251	14.9479	16.2396	0	946.998	763.365	564.537	14.9846	16.4297	0	946.998	745.123	541.107	0	0	0	1	0	1
41.64_1976.9163n	No	1	#21804	2	41.6352	1976.92	5.6886	TTAEGEASRQLQCEREL	[13] Carbamidomethyl C	P10387	Glutenin_ high molecular weight subunit DY10 OS=Triticum aestivum OX=4565 GN=GLU-D1-2B PE=3 SV=1	1.39497	Condition 2	Condition 1	0.341994	84.1327	19.1971	50.7057	126.229	73.3668	99.1191	101.112	19.2442	51.2996	121.011	73.3668	96.7505	96.9158	1	1	1	1	1	1
47.84_1212.5446n	No	1	#19068	2	47.8375	1212.54	5.4134	WGTSSQTVQGY		P10387	Glutenin_ high molecular weight subunit DY10 OS=Triticum aestivum OX=4565 GN=GLU-D1-2B PE=3 SV=1	5.58561	Condition 2	Condition 1	0.00569077	48.379	36.1476	51.4805	17.5944	198.716	229.994	159.022	36.2362	52.0834	16.867	198.716	224.497	152.422	0	0	0	1	0	1
43.85_2277.0424n	No	1	#15849	2	43.8514	2277.04	5.4986	QQPGQGQQQGQGQQGYYPTSL		P10387	Glutenin_ high molecular weight subunit DY10 OS=Triticum aestivum OX=4565 GN=GLU-D1-2B PE=3 SV=1	1.65331	Condition 2	Condition 1	0.142282	34.6488	123.203	257.052	202.477	392.089	354.07	217.278	123.505	260.062	194.106	392.089	345.609	208.26	0	1	0	0	1	1
36.29_2069.9578n	No	2	#9474,#5545	2,3	36.291	2069.96	6.217	YPGQASPQQPGQGQQPGKW	[10] Hydroxyproline|[16] Hydroxyproline	P10387	Glutenin_ high molecular weight subunit DY10 OS=Triticum aestivum OX=4565 GN=GLU-D1-2B PE=3 SV=1	23.4626	Condition 2	Condition 1	1.32e-06	11.1213	148.317	175.643	184.468	3846.33	3988.33	4094.41	148.681	177.7	176.842	3846.33	3893.02	3924.48	0	0	0	2	2	2
28.79_1715.7575n	No	1	#17908	2	28.7938	1715.76	5.487	QQPGQGQQQGQGQQGY		P10387	Glutenin_ high molecular weight subunit DY10 OS=Triticum aestivum OX=4565 GN=GLU-D1-2B PE=3 SV=1	3.22157	Condition 2	Condition 1	0.00572694	26.5378	256.287	159.182	270.871	785.895	873.434	551.765	256.916	161.047	259.673	785.895	852.562	528.865	0	0	0	1	1	0
33.17_962.4579n	No	1	#10267	2	33.1737	962.458	5.1396	QQLQQGIF	[4] Deamidation Q|[5] Deamidation Q	P10387	Glutenin_ high molecular weight subunit DY10 OS=Triticum aestivum OX=4565 GN=GLU-D1-2B PE=3 SV=1	1.16443	Condition 2	Condition 1	0.103655	10.5207	412.454	459.958	452.522	452.711	535.798	554.29	413.466	465.345	433.814	452.711	522.994	531.285	1	0	1	0	0	0
53.48_1161.5555n	No	1	#10496	2	53.4786	1161.56	5.345	TTAEGEASRQL		P10387	Glutenin_ high molecular weight subunit DY10 OS=Triticum aestivum OX=4565 GN=GLU-D1-2B PE=3 SV=1	1.49981	Condition 1	Condition 2	0.0793502	30.1149	476.611	580.054	508.752	336.688	249.205	457.849	477.78	586.848	487.719	336.688	243.25	438.847	1	1	1	0	0	1
58.42_1785.8363n	No	1	#15246	2	58.4166	1785.84	5.4856	QQGIFWGTSSQTVQGY		P10387	Glutenin_ high molecular weight subunit DY10 OS=Triticum aestivum OX=4565 GN=GLU-D1-2B PE=3 SV=1	4.9612	Condition 1	Condition 2	5.5e-05	14.0907	765.022	664.014	576.768	135.175	142.412	126.711	766.898	671.791	552.923	135.175	139.009	121.452	0	1	1	0	0	1
57.24_2179.0980n	No	1	#7505	2	57.2404	2179.1	5.4391	RDVSAKCRSVAVSQVARQY	[7] Carbamidomethyl C	P10387	Glutenin_ high molecular weight subunit DY10 OS=Triticum aestivum OX=4565 GN=GLU-D1-2B PE=3 SV=1	1.63851	Condition 2	Condition 1	0.00260688	10.1315	797.439	763.014	687.702	1345.73	1240.05	1097.83	799.394	771.95	659.271	1345.73	1210.42	1052.26	1	1	1	1	0	0
43.83_2277.0391n	No	1	#7062	3	43.8342	2277.04	5.5542	YPTSLQQPGQGQQQGQGQQGY		P10387	Glutenin_ high molecular weight subunit DY10 OS=Triticum aestivum OX=4565 GN=GLU-D1-2B PE=3 SV=1	1.41358	Condition 2	Condition 1	0.00799784	10.3225	1063.19	879.034	911.965	1374.44	1419.1	1241.1	1065.8	889.33	874.262	1374.44	1385.19	1189.59	1	1	0	1	1	1
37.30_1780.7928n	No	1	#5967	3	37.2959	1780.79	5.292	QEPGQGQQWYYPTSL		P10387	Glutenin_ high molecular weight subunit DY10 OS=Triticum aestivum OX=4565 GN=GLU-D1-2B PE=3 SV=1	3.02354	Condition 1	Condition 2	0.00221878	25.4143	1586.46	1509.98	1489.44	358.066	565.55	593.11	1590.35	1527.66	1427.87	358.066	552.035	568.494	0	1	0	1	1	1
37.28_1780.7939n	No	1	#6368	2	37.2788	1780.79	5.292	QEPGQGQQWYYPTSL		P10387	Glutenin_ high molecular weight subunit DY10 OS=Triticum aestivum OX=4565 GN=GLU-D1-2B PE=3 SV=1	3.93932	Condition 1	Condition 2	0.000343279	19.9693	1625.64	1644.48	1639.75	322.648	482.423	441.303	1629.62	1663.74	1571.96	322.648	470.895	422.988	0	1	0	1	0	1
52.06_742.3548n	No	1	#1213	1	52.0624	742.355	6.9675	YYPTSL		P10387	Glutenin_ high molecular weight subunit DY10 OS=Triticum aestivum OX=4565 GN=GLU-D1-2B PE=3 SV=1	3.20355	Condition 2	Condition 1	3.91e-06	5.18618	2482.78	2424.65	2675.1	8098.09	7887.96	8304.95	2488.87	2453.04	2564.51	8098.09	7699.46	7960.27	1	1	1	1	1	1
44.53_2246.0370n	No	2	#10446,#6706	2,3	44.5304	2246.04	6.1831	YPTSPQQPGQGQQLGQGQQGY		P10387	Glutenin_ high molecular weight subunit DY10 OS=Triticum aestivum OX=4565 GN=GLU-D1-2B PE=3 SV=1	1.82358	Condition 2	Condition 1	0.0085514	21.8063	2527.75	1691.02	1862.29	3425.51	3926.7	3737.13	2533.95	1710.83	1785.3	3425.51	3832.86	3582.02	2	2	0	2	2	2
42.08_1344.6212n	No	1	#2871	2	42.0809	1344.62	5.397	EACRQVVDQQL	[3] Carbamidomethyl C	P10387	Glutenin_ high molecular weight subunit DY10 OS=Triticum aestivum OX=4565 GN=GLU-D1-2B PE=3 SV=1	1.57203	Condition 2	Condition 1	7.06e-05	3.33971	2896.98	3069.93	2914.24	4814.93	4504.79	4641.68	2904.09	3105.88	2793.75	4814.93	4397.14	4449.03	0	0	0	1	1	0
53.07_2854.3109n	No	1	#4656	3	53.0672	2854.31	5.4028	YPTSLQQPGQGQQQGQGQQGYYPTSL	[8] Hydroxyproline	P10387	Glutenin_ high molecular weight subunit DY10 OS=Triticum aestivum OX=4565 GN=GLU-D1-2B PE=3 SV=1	1.83214	Condition 2	Condition 1	0.000155876	6.72895	2964.8	2775.71	2829.71	5589.95	4885.71	5226.15	2972.07	2808.22	2712.72	5589.95	4768.95	5009.25	0	1	1	0	0	0
51.70_1394.6380n	No	1	#5209	2	51.7024	1394.64	5.3631	QCERELQESSL	[N-term] Pyroglutamic acid|[2] Carbamidomethyl C	P10387	Glutenin_ high molecular weight subunit DY10 OS=Triticum aestivum OX=4565 GN=GLU-D1-2B PE=3 SV=1	1.59669	Condition 2	Condition 1	0.000347592	6.46314	3145	3360.27	3579.53	5404.47	5186.16	5511.69	3152.71	3399.63	3431.54	5404.47	5062.22	5282.93	1	0	0	0	1	0
58.07_1889.8745n	No	1	#4234	2	58.0738	1889.87	5.4025	QESSLEACRQVVDQQL	[8] Carbamidomethyl C|[10] Deamidation Q	P10387	Glutenin_ high molecular weight subunit DY10 OS=Triticum aestivum OX=4565 GN=GLU-D1-2B PE=3 SV=1	1.32563	Condition 2	Condition 1	0.00358027	7.92174	4577.81	4029.03	3978.67	5598.85	5648.01	5436.9	4589.04	4076.22	3814.18	5598.85	5513.04	5211.25	0	0	0	1	0	1
41.64_1614.7405n	No	1	#1275	2	41.6352	1614.74	6.8976	QQSGQGQQGHYPTSL		P10387	Glutenin_ high molecular weight subunit DY10 OS=Triticum aestivum OX=4565 GN=GLU-D1-2B PE=3 SV=1	2.91936	Condition 2	Condition 1	3.81e-06	5.03773	4670.51	5160.36	4992.34	14205.1	14541.6	14527.7	4681.96	5220.8	4785.94	14205.1	14194.1	13924.7	1	1	1	1	1	1
57.26_2179.1050n	No	1	#2098	3	57.2576	2179.1	5.4391	RDVSAKCRSVAVSQVARQY	[7] Carbamidomethyl C	P10387	Glutenin_ high molecular weight subunit DY10 OS=Triticum aestivum OX=4565 GN=GLU-D1-2B PE=3 SV=1	1.60389	Condition 2	Condition 1	0.000539334	7.18614	5379.71	4665.93	4951.7	7781.81	8370.24	7902	5392.9	4720.58	4746.99	7781.81	8170.21	7574.04	1	1	1	1	0	0
57.06_960.5051n	No	2	#2001,#2064	1,2	57.0604	960.505	6.5282	QQLQQGIF		P10387	Glutenin_ high molecular weight subunit DY10 OS=Triticum aestivum OX=4565 GN=GLU-D1-2B PE=3 SV=1	1.25694	Condition 2	Condition 1	0.000486694	3.37019	6292.21	6468.55	6727.46	8002.48	8201.48	8291.55	6307.64	6544.31	6449.33	8002.48	8005.49	7947.43	2	2	2	2	2	2
43.68_1527.7342n	No	1	#1597	2	43.6799	1527.73	7.031	YPTSPQQPGQGQQL		P10387	Glutenin_ high molecular weight subunit DY10 OS=Triticum aestivum OX=4565 GN=GLU-D1-2B PE=3 SV=1	1.61717	Condition 2	Condition 1	0.000271782	5.73174	6922.49	7426.94	7313.57	10913.6	12160.9	11958.2	6939.47	7513.92	7011.21	10913.6	11870.3	11461.9	1	1	1	1	1	1
45.49_1139.4992n	No	1	#1610	2	45.4904	1139.5	5.5198	QMRCCQQL	[N-term] Pyroglutamic acid|[4] Carbamidomethyl C|[5] Carbamidomethyl C	P10387	Glutenin_ high molecular weight subunit DY10 OS=Triticum aestivum OX=4565 GN=GLU-D1-2B PE=3 SV=1	1.13763	Condition 1	Condition 2	0.00927637	4.2105	7423.17	7037.98	6834.69	6088.75	6274.87	6355.8	7441.37	7120.41	6552.13	6088.75	6124.92	6092.01	1	0	0	1	0	0
49.00_876.4238n	No	1	#1260	1	48.9967	876.424	6.2289	YPGETTPL		P10387	Glutenin_ high molecular weight subunit DY10 OS=Triticum aestivum OX=4565 GN=GLU-D1-2B PE=3 SV=1	1.20494	Condition 2	Condition 1	0.00337365	4.72986	7977.68	8530.83	8750.54	10028.7	10020.5	10386.3	7997.24	8630.74	8388.77	10028.7	9781.06	9955.27	1	1	1	1	1	1
44.40_2037.9674n	No	2	#2492,#2390	2,3	44.3999	2037.97	6.3699	YPGQASPQQPGQGQQPGKW		P10387	Glutenin_ high molecular weight subunit DY10 OS=Triticum aestivum OX=4565 GN=GLU-D1-2B PE=3 SV=1	1.77993	Condition 1	Condition 2	0.0030193	14.9078	10371.9	10039.4	10186.9	4744.01	6207.85	6238.91	10397.4	10157	9765.78	4744.01	6059.5	5979.97	1	1	1	1	1	1
52.78_698.3930n	No	2	#2341,#785	1,2	52.7843	698.393	5.941	AGRLPW		P10387	Glutenin_ high molecular weight subunit DY10 OS=Triticum aestivum OX=4565 GN=GLU-D1-2B PE=3 SV=1	1.29843	Condition 1	Condition 2	0.0011163	4.98354	13504	14513.6	14880	10864.4	10917.6	11256	13537.1	14683.6	14264.8	10864.4	10656.7	10788.8	1	1	1	1	0	1
48.83_1528.7057n	No	1	#627	2	48.8253	1528.71	5.7043	YPTSPQQPGQGQQL	[6] Deamidation Q	P10387	Glutenin_ high molecular weight subunit DY10 OS=Triticum aestivum OX=4565 GN=GLU-D1-2B PE=3 SV=1	1.25771	Condition 1	Condition 2	0.000441807	3.45246	18946.2	18932.4	19440.8	14892.7	14884.6	15797.1	18992.6	19154.2	18637.1	14892.7	14529	15141.4	1	1	1	1	1	1
53.62_1906.9005n	No	2	#583,#6698	2,3	53.621	1906.9	5.4099	QESSLEACRQVVDQQL	[N-term] Pyroglutamic acid|[8] Carbamidomethyl C|[10] Deamidation Q	P10387	Glutenin_ high molecular weight subunit DY10 OS=Triticum aestivum OX=4565 GN=GLU-D1-2B PE=3 SV=1	1.11797	Condition 1	Condition 2	0.0342512	6.0009	32293.7	28942.3	29417.7	26767.8	26887.1	27432.9	32372.9	29281.3	28201.5	26767.8	26244.6	26294.3	2	2	2	0	0	0
49.10_2537.1540n	No	1	#29	3	49.0996	2537.15	5.9045	WGTSSQTVQGYYPGVTSPRQGSY	[13] Hydroxyproline|[18] Hydroxyproline	P10387	Glutenin_ high molecular weight subunit DY10 OS=Triticum aestivum OX=4565 GN=GLU-D1-2B PE=3 SV=1	1.51136	Condition 2	Condition 1	3.47e-06	1.74011	62482.8	61621.5	62707	92288.4	95455.4	94595.4	62636	62343.2	60114.5	92288.4	93174.3	90669.4	1	1	1	1	1	1
54.87_1261.6060n	No	1	#56	2	54.8708	1261.61	5.091	YPGETTPLQQL	[2] Hydroxyproline	P10387	Glutenin_ high molecular weight subunit DY10 OS=Triticum aestivum OX=4565 GN=GLU-D1-2B PE=3 SV=1	1.00502	Condition 2	Condition 1	0.710243	2.10041	81073.3	78011	80735.7	79698.3	80527.1	80798.4	81272.1	78924.6	77397.9	79698.3	78602.8	77445	0	0	1	0	0	1
60.05_1818.9288n	No	1	#199	2	60.0486	1818.93	5.081	YPGETTPLQQLQQGIF		P10387	Glutenin_ high molecular weight subunit DY10 OS=Triticum aestivum OX=4565 GN=GLU-D1-2B PE=3 SV=1	1.15049	Condition 2	Condition 1	0.000406803	1.70291	84374.8	82247.5	82304.7	94363.7	97329.9	94693.8	84581.7	83210.7	78902	94363.7	95004	90763.7	1	0	1	1	0	1
49.95_967.4667n	Yes	2	#5169,#6894	1,2	49.9501	967.467	5.5919	YYPTSPQL		P10388	Glutenin_ high molecular weight subunit DX5 OS=Triticum aestivum OX=4565 GN=GLU-1D-1D PE=3 SV=5	1.95605	Condition 1	Condition 2	6.27e-05	5.46305	1790.39	1732.84	1865.48	960.034	862.642	932.228	1794.79	1753.14	1788.36	960.034	842.028	893.537	2	1	0	0	2	2
67.16_2003.9365n	Yes	2	#800,#11791	2,3	67.1643	2003.94	5.1775	QQSGQGQHWYYPTSPQL		P10388	Glutenin_ high molecular weight subunit DX5 OS=Triticum aestivum OX=4565 GN=GLU-1D-1D PE=3 SV=5	2.36356	Condition 1	Condition 2	1.62e-05	5.4536	17292.5	17471.9	16670.4	7547.87	7409.58	6804.08	17334.9	17676.5	15981.2	7547.87	7232.51	6521.69	0	1	0	1	0	0
51.86_1756.7614n	Yes	1	#10203	2	51.8567	1756.76	5.3562	YPTSPQQSGQGQPGYY		P10388	Glutenin_ high molecular weight subunit DX5 OS=Triticum aestivum OX=4565 GN=GLU-1D-1D PE=3 SV=5	96.429	Condition 2	Condition 1	0.000268747	72.3737	29.0515	8.10337	10.4346	1633.1	1517.79	1438.12	29.1228	8.19827	10.0032	1633.1	1481.52	1378.44	0	0	0	1	0	1
52.96_2930.2699n	Yes	1	#19781	3	52.9643	2930.27	5.2509	YPTSPQESGQGQQPGQWQQPGQGQPGY	[20] Hydroxyproline	P10388	Glutenin_ high molecular weight subunit DX5 OS=Triticum aestivum OX=4565 GN=GLU-1D-1D PE=3 SV=5	1.99162	Condition 2	Condition 1	0.0584676	38.3724	85.567	119.389	117.962	302.797	140.111	200.222	85.7768	120.788	113.085	302.797	136.763	191.912	0	1	0	1	0	0
36.90_1204.5774n	Yes	1	#6986	2	36.9016	1204.58	5.1835	YPTSPQQSGQL		P10388	Glutenin_ high molecular weight subunit DX5 OS=Triticum aestivum OX=4565 GN=GLU-1D-1D PE=3 SV=5	1.06855	Condition 2	Condition 1	0.4173	9.81514	667.15	630.215	568.726	626.806	627.2	739.998	668.786	637.596	545.213	626.806	612.212	709.286	1	1	0	0	1	1
55.27_1874.8892n	Yes	1	#9649	3	55.2651	1874.89	5.2174	KRYYPSVTCPQQVSY	[9] Carbamidomethyl C	P10388	Glutenin_ high molecular weight subunit DX5 OS=Triticum aestivum OX=4565 GN=GLU-1D-1D PE=3 SV=5	1.91599	Condition 1	Condition 2	0.0157168	19.8849	818.558	756.838	549.658	442.434	308.633	358.048	820.565	765.702	526.933	442.434	301.258	343.188	0	1	1	0	0	0
45.78_2433.1651n	Yes	1	#8903	3	45.7758	2433.17	5.547	QQPEQGQPRYYPTSPQQSGQL	[N-term] Pyroglutamic acid	P10388	Glutenin_ high molecular weight subunit DX5 OS=Triticum aestivum OX=4565 GN=GLU-1D-1D PE=3 SV=5	1.16525	Condition 1	Condition 2	0.0377166	7.76859	1081.7	1264.01	1185.28	1051.12	987.84	991.271	1084.35	1278.81	1136.27	1051.12	964.234	950.13	0	0	1	1	0	0
46.02_2433.1351n	Yes	1	#3807	3	46.0158	2433.14	5.3627	QQPEQGQPRYYPTSPQQSGQL	[2] Deamidation Q|[3] Hydroxyproline	P10388	Glutenin_ high molecular weight subunit DX5 OS=Triticum aestivum OX=4565 GN=GLU-1D-1D PE=3 SV=5	1.12122	Condition 2	Condition 1	0.0177332	4.57156	3486.57	3314.18	3183.23	3829.02	3660.68	3704.58	3495.12	3352.99	3051.63	3829.02	3573.21	3550.83	1	0	0	0	1	1
28.66_2860.2717n	Yes	1	#4164	3	28.6567	2860.27	5.2694	QPGQGQQGYYPTSPQQPGQGQQLGQW	[1] Deamidation Q|[16] Deamidation Q|[17] Hydroxyproline	P10388	Glutenin_ high molecular weight subunit DX5 OS=Triticum aestivum OX=4565 GN=GLU-1D-1D PE=3 SV=5	1.21267	Condition 2	Condition 1	0.0188216	8.45782	6036.66	6400.59	7120.13	7683.77	7897.37	8135.4	6051.46	6475.55	6825.76	7683.77	7708.65	7797.76	0	0	0	1	1	0
52.95_2416.1220n	Yes	1	#4041	3	52.9472	2416.12	5.159	QQPEQGQPRYYPTSPQQSGQL		P10388	Glutenin_ high molecular weight subunit DX5 OS=Triticum aestivum OX=4565 GN=GLU-1D-1D PE=3 SV=5	1.19336	Condition 2	Condition 1	0.00617362	4.83428	11572.1	11000	12117.9	14290.4	13417.6	13689.8	11600.5	11128.8	11616.9	14290.4	13096.9	13121.7	0	1	1	0	1	0
51.91_4082.7736n	Yes	1	#1029	3	51.9081	4082.77	---	QQPAQGQQPGQGQQGQQPGQGQQGQQPGQGQQPGQGQPGY	[1] Deamidation Q|[11] Deamidation Q|[29] Deamidation Q	P10388	Glutenin_ high molecular weight subunit DX5 OS=Triticum aestivum OX=4565 GN=GLU-1D-1D PE=3 SV=5	7.00957	Condition 1	Condition 2	1.51e-05	11.435	29195.7	33377.4	32932.7	5107.33	4431.35	4086.38	29267.3	33768.4	31571.2	5107.33	4325.45	3916.78	0	0	0	0	0	0
51.89_4082.7781n	Yes	1	#5	4	51.8909	4082.78	5.4126	QQPAQGQQPGQGQQGQQPGQGQQGQQPGQGQQPGQGQPGY	[1] Deamidation Q|[11] Deamidation Q|[29] Deamidation Q	P10388	Glutenin_ high molecular weight subunit DX5 OS=Triticum aestivum OX=4565 GN=GLU-1D-1D PE=3 SV=5	4.35803	Condition 1	Condition 2	2.98e-07	3.45335	340119	335433	345843	79317.6	80018.5	75034.8	340953	339361	331545	79317.6	78106.3	71920.6	1	0	0	0	0	1
39.39_1221.5480n	No	1	#10322	2	39.3912	1221.55	5.9399	QQPGQGQPGYY		P10388	Glutenin_ high molecular weight subunit DX5 OS=Triticum aestivum OX=4565 GN=GLU-1D-1D PE=3 SV=5	18.8027	Condition 2	Condition 1	0.00013775	35.9686	81.1871	162.757	105.43	2062.17	2381.75	2125.28	81.3862	164.663	101.071	2062.17	2324.83	2037.07	0	0	0	1	1	1
53.24_1297.5931n	No	1	#15443	2	53.2386	1297.59	5.8048	GQGQQGYYPTSL		P10388	Glutenin_ high molecular weight subunit DX5 OS=Triticum aestivum OX=4565 GN=GLU-1D-1D PE=3 SV=5	4.83143	Condition 2	Condition 1	0.000341859	22.4555	83.7521	79.9801	68.6632	470.621	316.081	336.099	83.9575	80.9168	65.8244	470.621	308.527	322.15	0	0	0	1	0	1
26.09_1678.7357n	No	1	#17312	2	26.0877	1678.74	5.4289	QQTGQGQQSGQGQQGY		P10388	Glutenin_ high molecular weight subunit DX5 OS=Triticum aestivum OX=4565 GN=GLU-1D-1D PE=3 SV=5	4.62734	Condition 2	Condition 1	0.00795569	48.0964	84.5381	37.1512	110.615	374.091	328.136	372.721	84.7454	37.5863	106.041	374.091	320.294	357.252	0	0	1	1	1	1
57.19_1538.7376n	No	1	#5589	2	57.189	1538.74	6.3291	QLGQGQQGYYPTSL		P10388	Glutenin_ high molecular weight subunit DX5 OS=Triticum aestivum OX=4565 GN=GLU-1D-1D PE=3 SV=5	15.0322	Condition 2	Condition 1	6.65e-06	14.3683	158.346	134.679	179.972	2424.56	2444.06	2241.58	158.734	136.257	172.531	2424.56	2385.66	2148.55	0	1	1	1	1	1
32.00_1058.4810n	No	1	#12894	2	31.9972	1058.48	5.3267	QQPGQGQPGY		P10388	Glutenin_ high molecular weight subunit DX5 OS=Triticum aestivum OX=4565 GN=GLU-1D-1D PE=3 SV=5	3.4924	Condition 2	Condition 1	0.00051928	20.2976	220.428	329.013	261.228	1012.69	873.445	945.044	220.968	332.867	250.428	1012.69	852.572	905.821	0	0	0	0	1	1
35.69_977.4592n	No	1	#6924	2	35.691	977.459	5.0141	QLGQGQQGY		P10388	Glutenin_ high molecular weight subunit DX5 OS=Triticum aestivum OX=4565 GN=GLU-1D-1D PE=3 SV=5	3.47888	Condition 2	Condition 1	0.00100869	23.5993	275.607	325.171	434.8	1132.13	1117.92	1352.61	276.283	328.98	416.824	1132.13	1091.21	1296.47	1	0	0	1	1	1
32.66_2629.2239n	No	1	#20609	4	32.6594	2629.22	5.1641	QQPGQGQPGYYPTSPLQPGQGQPGY		P10388	Glutenin_ high molecular weight subunit DX5 OS=Triticum aestivum OX=4565 GN=GLU-1D-1D PE=3 SV=5	3.54633	Condition 1	Condition 2	0.21547	87.8676	298.129	269.206	193.26	117.858	96.6159	0	298.86	272.359	185.27	117.858	94.3071	0	1	1	0	0	0	0
28.10_1132.5343n	No	1	#10270	2	28.0977	1132.53	5.2518	TVAEGEASEQL		P10388	Glutenin_ high molecular weight subunit DX5 OS=Triticum aestivum OX=4565 GN=GLU-1D-1D PE=3 SV=5	1.20752	Condition 1	Condition 2	0.0780742	14.2784	353.943	361.419	378.85	286.352	350.836	268.979	354.811	365.652	363.187	286.352	342.452	257.815	1	1	1	1	1	1
49.55_2231.0836n	No	1	#13979	3	49.5453	2231.08	5.1112	VALTVAEGEASEQLQCEREL	[16] Carbamidomethyl C	P10388	Glutenin_ high molecular weight subunit DX5 OS=Triticum aestivum OX=4565 GN=GLU-1D-1D PE=3 SV=5	2.1789	Condition 2	Condition 1	0.00163599	17.0231	376.668	310.54	269.08	734.837	700.334	648.488	377.592	314.178	257.955	734.837	683.598	621.574	1	0	1	0	0	0
55.91_692.3731n	No	1	#7479	1	55.91	692.373	5.7656	YLTSPL		P10388	Glutenin_ high molecular weight subunit DX5 OS=Triticum aestivum OX=4565 GN=GLU-1D-1D PE=3 SV=5	1.53082	Condition 2	Condition 1	0.000167299	4.40811	408.777	429.951	405.247	621.268	616.097	666.94	409.779	434.987	388.493	621.268	601.374	639.26	0	0	0	1	1	1
31.11_1671.7976n	No	1	#18171	2	31.1122	1671.8	5.0681	AAQLPAMCRLEGGDAL	[8] Carbamidomethyl C	P10388	Glutenin_ high molecular weight subunit DX5 OS=Triticum aestivum OX=4565 GN=GLU-1D-1D PE=3 SV=5	1.12567	Condition 2	Condition 1	0.417584	29.381	412.602	384.555	641.389	527.195	544.925	547.203	413.614	389.059	614.872	527.195	531.903	524.493	1	1	0	0	0	0
51.02_1885.9026n	No	1	#17395	2	51.0231	1885.9	5.1301	YPTSPQLSGQGQRPGQW		P10388	Glutenin_ high molecular weight subunit DX5 OS=Triticum aestivum OX=4565 GN=GLU-1D-1D PE=3 SV=5	1.58383	Condition 1	Condition 2	0.0146468	17.747	473.074	451.946	420.114	316.027	307.995	225.269	474.234	457.239	402.745	316.027	300.635	215.92	1	1	0	0	1	0
55.84_1635.7897n	No	1	#3326	2	55.8415	1635.79	6.6935	LQPGQGQQGYYPTSL		P10388	Glutenin_ high molecular weight subunit DX5 OS=Triticum aestivum OX=4565 GN=GLU-1D-1D PE=3 SV=5	9.07585	Condition 2	Condition 1	1.87e-06	8.18094	539.533	479.398	462.718	4475.14	4301	4671.08	540.856	485.013	443.588	4475.14	4198.22	4477.21	1	1	1	1	1	1
42.32_1347.6302n	No	1	#6134	2	42.3209	1347.63	6.0641	KACQQVMDQQL	[3] Carbamidomethyl C	P10388	Glutenin_ high molecular weight subunit DX5 OS=Triticum aestivum OX=4565 GN=GLU-1D-1D PE=3 SV=5	2.43165	Condition 2	Condition 1	0.000312492	10.0318	613.787	629.134	735.26	1443.4	1697.45	1669.4	615.292	636.502	704.863	1443.4	1656.89	1600.11	0	1	1	1	1	1
34.16_1554.7237n	No	1	#5078	4	34.1617	1554.72	---	QLGQGQQGYYPTSL	[11] Hydroxyproline	P10388	Glutenin_ high molecular weight subunit DX5 OS=Triticum aestivum OX=4565 GN=GLU-1D-1D PE=3 SV=5	4.20574	Condition 2	Condition 1	0.00145164	27.5035	621.696	678.071	386.592	2060.58	2553.94	2477.87	623.22	686.012	370.609	2060.58	2492.91	2375.03	0	0	0	0	0	0
46.94_1203.5526n	No	1	#8346	2	46.9353	1203.55	5.2604	QCERELQEL	[2] Carbamidomethyl C	P10388	Glutenin_ high molecular weight subunit DX5 OS=Triticum aestivum OX=4565 GN=GLU-1D-1D PE=3 SV=5	1.15196	Condition 1	Condition 2	0.108724	8.62248	695.704	796.2	812.036	629.539	732.885	637.592	697.41	805.525	778.464	629.539	715.372	611.129	0	1	0	0	1	0
37.28_1081.5161n	No	1	#10555	2	37.2788	1081.52	5.1416	QQLGQGQSGY	[N-term] Pyroglutamic acid	P10388	Glutenin_ high molecular weight subunit DX5 OS=Triticum aestivum OX=4565 GN=GLU-1D-1D PE=3 SV=5	1.19775	Condition 1	Condition 2	0.0579299	11.6843	703.152	691.198	680.515	501.292	629.778	601.239	704.877	699.293	652.381	501.292	614.728	576.285	1	1	0	1	0	0
74.16_655.3704n	No	1	#5003	1	74.1603	655.37	5.9008	WGIPAL		P10388	Glutenin_ high molecular weight subunit DX5 OS=Triticum aestivum OX=4565 GN=GLU-1D-1D PE=3 SV=5	1.44035	Condition 2	Condition 1	0.00858545	12.3171	963.842	1030.43	806.496	1408.6	1308.56	1316.93	966.205	1042.5	773.153	1408.6	1277.29	1262.27	1	1	1	1	1	1
42.66_804.3878n	No	1	#2779	1	42.6577	804.388	5.2238	YPTSPQL		P10388	Glutenin_ high molecular weight subunit DX5 OS=Triticum aestivum OX=4565 GN=GLU-1D-1D PE=3 SV=5	3.45264	Condition 2	Condition 1	9.33e-05	13.5094	1016	1327.48	1139.57	4016.57	3907.83	4101.32	1018.49	1343.03	1092.46	4016.57	3814.45	3931.1	0	0	0	1	1	1
48.33_1588.7575n	No	1	#7751	2	48.3347	1588.76	5.3097	YPTSPLQPGQGQPGY		P10388	Glutenin_ high molecular weight subunit DX5 OS=Triticum aestivum OX=4565 GN=GLU-1D-1D PE=3 SV=5	1.62405	Condition 1	Condition 2	0.0118428	20.3839	1060.13	1111.65	1094.36	826.955	608.886	575.261	1062.73	1124.67	1049.12	826.955	594.335	551.386	1	0	0	0	1	0
51.79_2036.8869n	No	1	#9984	2	51.7881	2036.89	6.067	YYPTSPQESGQGQQPGQW		P10388	Glutenin_ high molecular weight subunit DX5 OS=Triticum aestivum OX=4565 GN=GLU-1D-1D PE=3 SV=5	1.43735	Condition 2	Condition 1	0.00350976	7.55923	1128.86	1292.36	1190.95	1863.17	1727.22	1601.59	1131.63	1307.5	1141.72	1863.17	1685.94	1535.11	0	1	1	1	1	1
55.39_1885.9140n	No	1	#11552	2	55.3851	1885.91	5.3275	YPTSPQLSGQGQRPGQW		P10388	Glutenin_ high molecular weight subunit DX5 OS=Triticum aestivum OX=4565 GN=GLU-1D-1D PE=3 SV=5	1.08092	Condition 1	Condition 2	0.153659	5.8049	1139.42	1055.08	1183.76	1098.76	998.865	1027.72	1142.21	1067.43	1134.82	1098.76	974.995	985.065	0	0	1	1	0	0
35.10_2344.0216n	No	1	#7117	3	35.0979	2344.02	5.266	GQGQQGYYPTSLQQSGQGQPGY	[9] Hydroxyproline	P10388	Glutenin_ high molecular weight subunit DX5 OS=Triticum aestivum OX=4565 GN=GLU-1D-1D PE=3 SV=5	2.06609	Condition 2	Condition 1	0.000459747	10.9307	1140.62	937.798	1141.36	2250.07	2118.99	2283.31	1143.42	948.781	1094.17	2250.07	2068.35	2188.55	0	0	1	1	0	0
56.98_2020.0006n	No	1	#9092	2	56.9833	2020	5.4085	QERELKACQQVMDQQL	[N-term] Pyroglutamic acid|[8] Carbamidomethyl C	P10388	Glutenin_ high molecular weight subunit DX5 OS=Triticum aestivum OX=4565 GN=GLU-1D-1D PE=3 SV=5	1.16656	Condition 2	Condition 1	0.0102081	4.86993	1147.52	1103.57	1078.36	1228.93	1354.63	1300.46	1150.33	1116.49	1033.78	1228.93	1322.26	1246.48	0	0	1	0	0	1
57.48_658.3545n	No	1	#3742	1	57.4804	658.354	5.6699	TSPLQL	[5] Deamidation Q	P10388	Glutenin_ high molecular weight subunit DX5 OS=Triticum aestivum OX=4565 GN=GLU-1D-1D PE=3 SV=5	1.26495	Condition 1	Condition 2	0.0012534	4.94391	1274.35	1354.4	1406.36	1058.39	1062.62	1068.92	1277.48	1370.26	1348.22	1058.39	1037.23	1024.56	1	1	1	1	1	0
50.57_2913.2753n	No	1	#8638	3	50.5672	2913.28	5.1294	YPTSPQQSGQGQQPGQWQQPGQGQPGY		P10388	Glutenin_ high molecular weight subunit DX5 OS=Triticum aestivum OX=4565 GN=GLU-1D-1D PE=3 SV=5	2.17812	Condition 1	Condition 2	0.00150605	13.2118	1303.08	1110.81	1034.09	477.623	498.089	607.298	1306.28	1123.82	991.339	477.623	486.187	582.093	1	1	1	1	1	1
32.13_1309.6391n	No	1	#4839	2	32.1343	1309.64	5.4758	QQPAQGQQGQQL		P10388	Glutenin_ high molecular weight subunit DX5 OS=Triticum aestivum OX=4565 GN=GLU-1D-1D PE=3 SV=5	1.20071	Condition 2	Condition 1	0.365889	24.4369	1319.61	1537.71	1281.2	1208.01	1994.83	1766.34	1322.85	1555.72	1228.23	1208.01	1947.16	1693.03	1	1	1	1	1	1
48.67_1334.6193n	No	1	#5806	2	48.671	1334.62	5.2502	QQPGQGQPGYYL		P10388	Glutenin_ high molecular weight subunit DX5 OS=Triticum aestivum OX=4565 GN=GLU-1D-1D PE=3 SV=5	1.29169	Condition 2	Condition 1	0.0539086	16.578	1359.79	1670.37	1903.17	2095.32	2125.94	2151.1	1363.13	1689.93	1824.49	2095.32	2075.14	2061.82	0	1	1	1	0	0
40.19_1858.9000n	No	1	#11037	2	40.1905	1858.9	5.2258	QCERELQELQEREL	[2] Carbamidomethyl C	P10388	Glutenin_ high molecular weight subunit DX5 OS=Triticum aestivum OX=4565 GN=GLU-1D-1D PE=3 SV=5	1.12476	Condition 1	Condition 2	0.159646	11.2907	1411.38	1531.5	1526.84	1481.54	1308.72	1183.69	1414.84	1549.44	1463.72	1481.54	1277.44	1134.56	0	1	0	0	1	0
51.52_1319.6238n	No	1	#6326	2	51.5202	1319.62	5.0667	YPTSSQLQPGQL	[6] Deamidation Q|[8] Deamidation Q	P10388	Glutenin_ high molecular weight subunit DX5 OS=Triticum aestivum OX=4565 GN=GLU-1D-1D PE=3 SV=5	1.13293	Condition 2	Condition 1	0.0107586	4.39841	1525.85	1558.03	1500.66	1658.43	1725.2	1810.36	1529.59	1576.28	1438.62	1658.43	1683.97	1735.22	1	0	1	0	0	0
37.49_1043.5289n	No	1	#1978	2	37.4948	1043.53	5.9428	QELQEREL		P10388	Glutenin_ high molecular weight subunit DX5 OS=Triticum aestivum OX=4565 GN=GLU-1D-1D PE=3 SV=5	2.97032	Condition 2	Condition 1	5.83e-05	8.69345	1648	1961.99	1807.96	5051.76	5344.49	5696.79	1652.04	1984.97	1733.22	5051.76	5216.78	5460.36	1	1	0	1	1	1
47.47_1588.7612n	No	1	#4770	2	47.4667	1588.76	5.2595	YPTSPLQPGQGQPGY		P10388	Glutenin_ high molecular weight subunit DX5 OS=Triticum aestivum OX=4565 GN=GLU-1D-1D PE=3 SV=5	1.11462	Condition 2	Condition 1	0.20781	13.2264	1779.78	1501.86	1378.68	1712.87	1773.43	1708.19	1784.15	1519.45	1321.68	1712.87	1731.05	1637.3	0	0	1	1	0	0
34.96_1074.5128n	No	1	#2038	2	34.9607	1074.51	6.831	LQPGQGQQGY		P10388	Glutenin_ high molecular weight subunit DX5 OS=Triticum aestivum OX=4565 GN=GLU-1D-1D PE=3 SV=5	1.68872	Condition 2	Condition 1	0.2974	47.4037	1788.73	1370.38	1191.3	1111.33	3041.34	3193.93	1793.11	1386.42	1142.05	1111.33	2968.66	3061.37	1	0	0	0	1	1
36.09_1176.5905n	No	1	#1762	2	36.0853	1176.59	6.3162	HVSVEHQAASL		P10388	Glutenin_ high molecular weight subunit DX5 OS=Triticum aestivum OX=4565 GN=GLU-1D-1D PE=3 SV=5	2.44021	Condition 2	Condition 1	0.000346953	12.5714	1946.33	1960.24	2078.88	5284.03	4165.72	5155.96	1951.1	1983.19	1992.93	5284.03	4066.17	4941.97	1	0	1	1	1	1
62.40_1676.7947n	No	1	#5778	2	62.4004	1676.79	5.0764	YSSYHVSVEHQAASL		P10388	Glutenin_ high molecular weight subunit DX5 OS=Triticum aestivum OX=4565 GN=GLU-1D-1D PE=3 SV=5	1.32175	Condition 2	Condition 1	0.00256978	6.57158	1960.01	2058.55	1977.72	2699.62	2779.22	2446.73	1964.82	2082.66	1895.96	2699.62	2712.81	2345.18	0	0	1	1	0	1
73.82_794.3820n	No	1	#4490	1	73.824	794.382	5.7944	YPTSSQL		P10388	Glutenin_ high molecular weight subunit DX5 OS=Triticum aestivum OX=4565 GN=GLU-1D-1D PE=3 SV=5	4.59238	Condition 1	Condition 2	3.53e-05	10.8378	1978.3	1893.19	1733.54	429.845	434.664	355.999	1983.15	1915.36	1661.88	429.845	424.277	341.224	1	0	1	1	0	0
50.87_1287.5918n	No	1	#5081	2	50.8688	1287.59	6.0112	YPTSPQQPGQW		P10388	Glutenin_ high molecular weight subunit DX5 OS=Triticum aestivum OX=4565 GN=GLU-1D-1D PE=3 SV=5	1.68037	Condition 1	Condition 2	0.00157342	9.36755	1981.27	2151.75	1876.77	1283.97	1224.66	1067.83	1986.13	2176.95	1799.18	1283.97	1195.39	1023.51	1	1	1	1	1	1
53.83_2373.1499n	No	1	#6375	3	53.8323	2373.15	5.3262	QELQERELKACQQVMDQQL	[11] Carbamidomethyl C	P10388	Glutenin_ high molecular weight subunit DX5 OS=Triticum aestivum OX=4565 GN=GLU-1D-1D PE=3 SV=5	1.06936	Condition 2	Condition 1	0.135532	4.8126	2185.51	2187.25	2341.13	2517.74	2290.54	2371.29	2190.87	2212.86	2244.34	2517.74	2235.8	2272.87	1	1	0	1	0	0
53.00_1542.7017n	No	1	#3135	3	52.9986	1542.7	5.1129	TSPQQSGQGQQPGQL	[10] Deamidation Q|[11] Deamidation Q|[14] Deamidation Q	P10388	Glutenin_ high molecular weight subunit DX5 OS=Triticum aestivum OX=4565 GN=GLU-1D-1D PE=3 SV=5	2.08597	Condition 2	Condition 1	7.32e-05	7.12736	2304.42	2431.9	2407.9	5376.32	4768.98	4757.34	2310.07	2460.38	2308.35	5376.32	4655.02	4559.9	0	1	0	0	1	0
46.80_2674.2324n	No	1	#6203	3	46.7981	2674.23	5.9487	QPGQGQPGYDPTSPQQPGQGQQPGQL		P10388	Glutenin_ high molecular weight subunit DX5 OS=Triticum aestivum OX=4565 GN=GLU-1D-1D PE=3 SV=5	1.0121	Condition 1	Condition 2	0.655447	3.76652	2673.35	2578.56	2479.24	2537.39	2504.18	2597.17	2679.91	2608.76	2376.74	2537.39	2444.34	2489.38	1	1	1	1	1	1
45.08_1203.5652n	No	1	#3516	2	45.079	1203.57	5.2834	QCERELQEL	[2] Carbamidomethyl C	P10388	Glutenin_ high molecular weight subunit DX5 OS=Triticum aestivum OX=4565 GN=GLU-1D-1D PE=3 SV=5	2.12385	Condition 1	Condition 2	3.57e-06	2.83385	2740	2850.04	2847.91	1330.43	1284.1	1358.41	2746.72	2883.42	2730.17	1330.43	1253.42	1302.03	1	0	0	1	0	0
42.57_1522.7073n	No	1	#2113	2	42.572	1522.71	5.3014	QPGQGQQGYYPTSL		P10388	Glutenin_ high molecular weight subunit DX5 OS=Triticum aestivum OX=4565 GN=GLU-1D-1D PE=3 SV=5	1.22941	Condition 2	Condition 1	0.0214816	9.38854	2789.14	3368.03	3111.32	3919.14	3708.67	3766.96	2795.98	3407.47	2982.69	3919.14	3620.05	3610.62	1	1	0	0	1	0
51.47_2856.3399n	No	1	#4859	3	51.4688	2856.34	6.2699	QQLGQGQSGYYPTSPQQPGQGQQPGQL		P10388	Glutenin_ high molecular weight subunit DX5 OS=Triticum aestivum OX=4565 GN=GLU-1D-1D PE=3 SV=5	1.11824	Condition 2	Condition 1	0.191692	12.9766	2849.85	2350.14	2247.76	2689.6	2823.79	2815.01	2856.84	2377.67	2154.83	2689.6	2756.31	2698.18	1	1	1	1	1	1
37.11_1873.8091n	No	1	#2556	3	37.1073	1873.81	5.3145	YPTSPQESGQGQQPGQW		P10388	Glutenin_ high molecular weight subunit DX5 OS=Triticum aestivum OX=4565 GN=GLU-1D-1D PE=3 SV=5	1.12657	Condition 2	Condition 1	0.130871	10.0387	3240.19	3187.2	3384.33	4037	3299.41	3717.2	3248.13	3224.53	3244.41	4037	3220.56	3562.92	0	0	0	1	1	1
46.14_1609.7473n	No	1	#3855	2	46.1358	1609.75	5.3152	QQSGQGQPGYYPTSL		P10388	Glutenin_ high molecular weight subunit DX5 OS=Triticum aestivum OX=4565 GN=GLU-1D-1D PE=3 SV=5	1.00544	Condition 1	Condition 2	0.872967	3.99765	3289.27	3036.82	3154.2	3010.9	3203.92	3214.16	3297.34	3072.39	3023.8	3010.9	3127.35	3080.76	0	1	1	1	1	1
50.45_2044.9743n	No	2	#9738,#8359	2,3	50.4472	2044.97	5.2388	AAQLPAMCRLEGGDALSASQ	[8] Carbamidomethyl C	P10388	Glutenin_ high molecular weight subunit DX5 OS=Triticum aestivum OX=4565 GN=GLU-1D-1D PE=3 SV=5	1.11666	Condition 2	Condition 1	0.0593913	7.00001	3788.72	3438.93	3314.24	3973.1	3803.98	3994.65	3798.01	3479.21	3177.22	3973.1	3713.07	3828.85	0	0	0	0	2	2
51.77_1825.8640n	No	1	#3986	2	51.7709	1825.86	5.2535	YPTSPQQPGQGQQPGQL	[14] Hydroxyproline	P10388	Glutenin_ high molecular weight subunit DX5 OS=Triticum aestivum OX=4565 GN=GLU-1D-1D PE=3 SV=5	1.21818	Condition 2	Condition 1	0.00780833	5.32531	4724.28	4702.25	5091.09	6242.7	5632.33	5810.08	4735.86	4757.32	4880.61	6242.7	5497.74	5568.94	0	1	0	0	1	0
55.54_1716.8109n	No	1	#3505	2	55.5394	1716.81	6.6004	QQPGQGQPGYYPTSPL		P10388	Glutenin_ high molecular weight subunit DX5 OS=Triticum aestivum OX=4565 GN=GLU-1D-1D PE=3 SV=5	1.4594	Condition 1	Condition 2	0.0127908	14.9057	5215.4	4117.03	4021.34	3116.93	2899.86	3133.41	5228.19	4165.25	3855.09	3116.93	2830.56	3003.36	1	1	1	1	1	1
45.91_2109.0238n	No	1	#1851	3	45.913	2109.02	5.2621	RDISPECHPVVVSPVAGQY	[7] Carbamidomethyl C	P10388	Glutenin_ high molecular weight subunit DX5 OS=Triticum aestivum OX=4565 GN=GLU-1D-1D PE=3 SV=5	2.16102	Condition 1	Condition 2	1.02e-05	4.26493	5887.61	5671.75	5663.69	2748.67	2530.09	2691.12	5902.05	5738.18	5429.54	2748.67	2469.63	2579.43	1	1	1	1	1	1
46.14_2002.9579n	No	2	#8578,#1559	2,3	46.1444	2002.96	5.8124	QERELKACQQVMDQQL	[8] Carbamidomethyl C	P10388	Glutenin_ high molecular weight subunit DX5 OS=Triticum aestivum OX=4565 GN=GLU-1D-1D PE=3 SV=5	1.62426	Condition 2	Condition 1	0.00051268	7.48642	6456.85	5927.78	6888.01	10051.1	10536.5	10716.2	6472.68	5997.21	6603.24	10051.1	10284.7	10271.4	0	0	0	0	2	2
47.68_1354.6426n	No	1	#1702	2	47.6833	1354.64	5.5144	QQPGQGQQPGQW	[N-term] Pyroglutamic acid	P10388	Glutenin_ high molecular weight subunit DX5 OS=Triticum aestivum OX=4565 GN=GLU-1D-1D PE=3 SV=5	1.06328	Condition 2	Condition 1	0.139502	5.05667	6789.69	7235.76	7508.72	7877.29	7560.07	7459.51	6806.34	7320.5	7198.29	7877.29	7379.41	7149.91	0	0	1	0	0	1
43.68_1527.7342n	No	1	#1597	2	43.6799	1527.73	7.031	YPTSPQQPGQGQQL		P10388	Glutenin_ high molecular weight subunit DX5 OS=Triticum aestivum OX=4565 GN=GLU-1D-1D PE=3 SV=5	1.61717	Condition 2	Condition 1	0.000271782	5.73174	6922.49	7426.94	7313.57	10913.6	12160.9	11958.2	6939.47	7513.92	7011.21	10913.6	11870.3	11461.9	1	1	1	1	1	1
52.69_1375.6599n	No	1	#812	2	52.69	1375.66	5.0841	TSPLQLGQGQQGY		P10388	Glutenin_ high molecular weight subunit DX5 OS=Triticum aestivum OX=4565 GN=GLU-1D-1D PE=3 SV=5	1.50083	Condition 2	Condition 1	0.00304611	10.5249	7211.22	8528.09	8833.5	11980.9	12403	12495.7	7228.91	8627.97	8468.3	11980.9	12106.6	11977.1	0	1	1	0	0	1
9.83_1212.5939n	No	1	#3187	2	9.82928	1212.59	5.1408	SGQGQRPGQWL		P10388	Glutenin_ high molecular weight subunit DX5 OS=Triticum aestivum OX=4565 GN=GLU-1D-1D PE=3 SV=5	898.578	Condition 1	Condition 2	0.00304581	173.205	7554.36	8005.24	5506.58	23.4439	0	0	7572.89	8099	5278.92	23.4439	0	0	1	1	1	0	0	0
44.49_2088.0488n	No	2	#9969,#1518	2,3	44.4857	2088.05	5.5511	YPGETTPPQQLQQRIFW		P10388	Glutenin_ high molecular weight subunit DX5 OS=Triticum aestivum OX=4565 GN=GLU-1D-1D PE=3 SV=5	1.31158	Condition 2	Condition 1	0.0276394	14.2609	9207.62	7107.64	7438.23	10073.9	10341	10739.9	9230.2	7190.89	7130.71	10073.9	10093.8	10294.1	0	1	2	0	2	2
46.01_1979.9240n	No	2	#6350,#3982	2,3	46.0073	1979.92	5.3713	QQSGQGQPGYYPTSLQQL	[7] Deamidation Q	P10388	Glutenin_ high molecular weight subunit DX5 OS=Triticum aestivum OX=4565 GN=GLU-1D-1D PE=3 SV=5	1.04825	Condition 1	Condition 2	0.00823282	1.35642	10551.8	10578.3	10814.1	10099.2	10274.5	10100.1	10577.7	10702.2	10367.1	10099.2	10029	9680.92	0	2	0	0	0	2
41.62_1652.8126n	No	1	#906	2	41.618	1652.81	7.1459	LTSPQQSGQGQQPGQL		P10388	Glutenin_ high molecular weight subunit DX5 OS=Triticum aestivum OX=4565 GN=GLU-1D-1D PE=3 SV=5	1.28434	Condition 2	Condition 1	0.00424675	6.79368	12010.3	13744.9	13145	16110.4	16896.5	16953.9	12039.7	13905.8	12601.5	16110.4	16492.7	16250.3	1	1	1	1	1	1
54.17_2187.0310n	No	2	#3499,#1309	2,3	54.1666	2187.03	5.4768	YPTSLQQSGQGQPGYYPTSL	[2] Hydroxyproline	P10388	Glutenin_ high molecular weight subunit DX5 OS=Triticum aestivum OX=4565 GN=GLU-1D-1D PE=3 SV=5	1.02217	Condition 1	Condition 2	0.777603	10.4038	12608.8	10759.7	10435.9	10989.9	11461.7	10619.4	12639.7	10885.7	10004.4	10989.9	11187.8	10178.7	0	0	0	0	2	2
45.18_1809.8658n	No	1	#1431	2	45.1818	1809.87	6.8411	YPTSPQQPGQGQQPGQL		P10388	Glutenin_ high molecular weight subunit DX5 OS=Triticum aestivum OX=4565 GN=GLU-1D-1D PE=3 SV=5	1.143	Condition 1	Condition 2	0.00747297	4.25315	13400.4	12954	13333.6	12041.9	11620.2	11060.6	13433.2	13105.7	12782.4	12041.9	11342.5	10601.6	1	1	1	1	1	1
46.57_1947.8759n	No	2	#4293,#1532	2,3	46.5667	1947.88	5.5961	TVAEGEASEQLQCEREL	[13] Carbamidomethyl C	P10388	Glutenin_ high molecular weight subunit DX5 OS=Triticum aestivum OX=4565 GN=GLU-1D-1D PE=3 SV=5	1.93724	Condition 1	Condition 2	0.000815053	12.829	14288.4	11341.8	11742.5	6413.87	6362.48	6515.36	14323.5	11474.6	11257.1	6413.87	6210.43	6244.95	2	2	2	2	0	2
48.83_1528.7057n	No	1	#627	2	48.8253	1528.71	5.7043	YPTSPQQPGQGQQL	[6] Deamidation Q	P10388	Glutenin_ high molecular weight subunit DX5 OS=Triticum aestivum OX=4565 GN=GLU-1D-1D PE=3 SV=5	1.25771	Condition 1	Condition 2	0.000441807	3.45246	18946.2	18932.4	19440.8	14892.7	14884.6	15797.1	18992.6	19154.2	18637.1	14892.7	14529	15141.4	1	1	1	1	1	1
55.39_582.3757n	No	1	#157	1	55.3851	582.376	5.4324	GIPALL		P10388	Glutenin_ high molecular weight subunit DX5 OS=Triticum aestivum OX=4565 GN=GLU-1D-1D PE=3 SV=5	1.53965	Condition 1	Condition 2	0.00279243	10.054	24510.5	20310.6	24072.9	15565.8	14961.2	14219.5	24570.6	20548.5	23077.6	15565.8	14603.7	13629.3	1	1	1	0	0	0
50.54_2913.2814n	No	2	#1040,#991	3,4	50.5415	2913.28	5.1294	YPTSPQQSGQGQQPGQWQQPGQGQPGY		P10388	Glutenin_ high molecular weight subunit DX5 OS=Triticum aestivum OX=4565 GN=GLU-1D-1D PE=3 SV=5	1.56467	Condition 1	Condition 2	0.00546898	14.1315	40585.3	33932.6	30875.6	22026.1	22791.1	22541	40684.8	34330	29599.1	22026.1	22246.5	21605.5	1	1	1	1	1	1
49.10_2537.1540n	No	1	#29	3	49.0996	2537.15	5.7006	QQPGQGQQPGQWQQSGQGQHWY		P10388	Glutenin_ high molecular weight subunit DX5 OS=Triticum aestivum OX=4565 GN=GLU-1D-1D PE=3 SV=5	1.51136	Condition 2	Condition 1	3.47e-06	1.74011	62482.8	61621.5	62707	92288.4	95455.4	94595.4	62636	62343.2	60114.5	92288.4	93174.3	90669.4	1	1	1	1	1	1
32.83_1556.7592n	No	1	#520	3	32.8309	1556.76	5.376	QLGQGQQGYYPTSL	[N-term] Pyroglutamic acid|[6] Deamidation Q	P10388	Glutenin_ high molecular weight subunit DX5 OS=Triticum aestivum OX=4565 GN=GLU-1D-1D PE=3 SV=5	2.72718	Condition 1	Condition 2	2.74e-06	3.8935	151792	152812	158506	54615	56224.1	58973.3	152164	154602	151953	54615	54880.6	56525.7	1	1	1	0	0	0
33.79_1307.7236n	Yes	2	#8725,#1782	2,3	33.7931	1307.72	5.2218	QQQPILPQLPF		P16315	Glutenin_ low molecular weight subunit PTDUCD1 OS=Triticum aestivum OX=4565 PE=2 SV=1	1.30019	Condition 2	Condition 1	0.000916457	4.71189	4458.51	4406.14	4594.37	5765.63	5598.23	6135.37	4469.44	4457.75	4404.42	5765.63	5464.45	5880.73	0	0	0	2	0	2
55.51_987.4509n	Yes	1	#22119	1	55.5051	987.451	5.4972	YSSTTSVPF		P16315	Glutenin_ low molecular weight subunit PTDUCD1 OS=Triticum aestivum OX=4565 PE=2 SV=1	3.46941	Condition 2	Condition 1	0.0438731	60.3092	43.2865	9.56597	41.4029	111.435	104.069	111.506	43.3926	9.67801	39.6912	111.435	101.582	106.879	0	0	0	1	0	1
59.64_1681.8583n	Yes	1	#21763	2	59.6441	1681.86	5.0154	LQQQCNPVAMPQRL	[5] Carbamidomethyl C	P16315	Glutenin_ low molecular weight subunit PTDUCD1 OS=Triticum aestivum OX=4565 PE=2 SV=1	1.6705	Condition 1	Condition 2	0.0595853	29.7399	258.568	206.246	285.361	154.04	191.874	103.158	259.202	208.662	273.563	154.04	187.289	98.8762	0	0	0	1	0	1
52.06_824.3911n	Yes	1	#7489	1	52.0624	824.391	5.8212	SSTTSVPF		P16315	Glutenin_ low molecular weight subunit PTDUCD1 OS=Triticum aestivum OX=4565 PE=2 SV=1	2.51983	Condition 2	Condition 1	5.18e-06	4.38661	340.953	312.338	328.756	821.459	843.882	809.246	341.789	315.996	315.164	821.459	823.716	775.66	0	0	0	1	1	1
44.07_1840.8689n	Yes	1	#6552	2	44.0742	1840.87	5.0973	FPQQQPFPQQQQPPF		P16315	Glutenin_ low molecular weight subunit PTDUCD1 OS=Triticum aestivum OX=4565 PE=2 SV=1	3.16255	Condition 2	Condition 1	5.37e-06	4.93149	611.855	570.612	599.418	1953.41	1907.01	1774.88	613.356	577.295	574.637	1953.41	1861.44	1701.22	0	0	0	0	1	1
58.57_1289.6612n	No	1	#11611	2	58.5709	1289.66	5.5042	SIILQEQQQGF		P16315	Glutenin_ low molecular weight subunit PTDUCD1 OS=Triticum aestivum OX=4565 PE=2 SV=1	182.503	Condition 2	Condition 1	0.00280998	101.185	4.35437	0	9.0203	816.756	841.585	782.583	4.36505	0	8.64737	816.756	821.474	750.103	0	0	0	1	1	1
52.72_1649.8073n	No	1	#19180	2	52.7243	1649.81	5.307	RTLPTMCSVNVPLY	[7] Carbamidomethyl C	P16315	Glutenin_ low molecular weight subunit PTDUCD1 OS=Triticum aestivum OX=4565 PE=2 SV=1	4.36018	Condition 1	Condition 2	0.00186847	27.3721	128.924	192.445	118.252	33.1143	41.5498	26.1622	129.24	194.699	113.363	33.1143	40.5569	25.0763	0	1	0	1	1	0
42.17_704.3688n	No	1	#5619	1	42.1666	704.369	5.0335	ARSQML		P16315	Glutenin_ low molecular weight subunit PTDUCD1 OS=Triticum aestivum OX=4565 PE=2 SV=1	1.24367	Condition 2	Condition 1	0.00390763	5.25972	538.652	505.579	507.467	619.305	681.971	628.527	539.973	511.501	486.487	619.305	665.674	602.441	0	0	0	1	1	0
52.01_1610.8002n	No	1	#7981	2	52.0109	1610.8	5.4447	SQQQQPVLPQQSPF		P16315	Glutenin_ low molecular weight subunit PTDUCD1 OS=Triticum aestivum OX=4565 PE=2 SV=1	1.4449	Condition 1	Condition 2	0.00127481	6.80839	1105.1	1091.06	1180.46	840.198	747.021	749.712	1107.81	1103.84	1131.66	840.198	729.169	718.597	1	0	0	1	0	1
51.98_1132.5769n	No	1	#1421	2	51.9766	1132.58	7.4811	QQLNPCKVF	[6] Carbamidomethyl C	P16315	Glutenin_ low molecular weight subunit PTDUCD1 OS=Triticum aestivum OX=4565 PE=2 SV=1	10.3262	Condition 2	Condition 1	3.54e-07	5.23417	1533.53	1701.68	1639.93	17179.3	16122.3	17040	1537.29	1721.61	1572.13	17179.3	15737.1	16332.7	1	1	1	1	1	1
32.83_868.4412n	No	2	#6522,#3366	1,2	32.8309	868.441	6.41	QQPQQQL		P16315	Glutenin_ low molecular weight subunit PTDUCD1 OS=Triticum aestivum OX=4565 PE=2 SV=1	1.79772	Condition 2	Condition 1	6.17e-05	5.5674	3861.32	4301.95	4191.59	7383.29	7510.18	7317.1	3870.79	4352.34	4018.3	7383.29	7330.71	7013.42	2	0	0	2	2	1
71.74_976.5063n	Yes	2	#4395,#12248	1,2	71.7386	976.506	5.7685	CTIAPVGIF	[1] Carbamidomethyl C	P18573	Alpha/beta-gliadin MM1 OS=Triticum aestivum OX=4565 PE=1 SV=1	1.28448	Condition 2	Condition 1	0.0335026	9.79034	1681.23	1656.21	1422.16	1820.8	2079.55	2213.24	1685.35	1675.61	1363.36	1820.8	2029.86	2121.38	1	0	0	1	0	2
60.12_1467.7874n	No	1	#11144	2	60.1172	1467.79	6.1937	QQQLIPCRDVVL	[7] Carbamidomethyl C	P18573	Alpha/beta-gliadin MM1 OS=Triticum aestivum OX=4565 PE=1 SV=1	17.6425	Condition 2	Condition 1	6.92e-05	30.1389	48.1694	40.7583	71.6601	939.026	994.79	899.353	48.2875	41.2356	68.6975	939.026	971.018	862.027	0	0	0	1	1	1
30.92_998.5373n	No	1	#4840	2	30.9236	998.537	5.7169	QQILQQQL	[6] Deamidation Q	P18573	Alpha/beta-gliadin MM1 OS=Triticum aestivum OX=4565 PE=1 SV=1	2.20068	Condition 2	Condition 1	0.000228098	7.70914	530.582	597.588	615.627	1189.98	1380.63	1266.93	531.883	604.586	590.175	1189.98	1347.64	1214.35	0	0	0	1	0	1
45.81_728.4097n	No	1	#123	1	45.8101	728.41	6.2181	QLVQQL	[4] Deamidation Q	P18573	Alpha/beta-gliadin MM1 OS=Triticum aestivum OX=4565 PE=1 SV=1	1.90985	Condition 2	Condition 1	1.67e-05	4.21846	13113.5	13414.5	13621	24961	24913.2	26804.2	13145.6	13571.6	13057.9	24961	24317.9	25691.7	1	0	0	1	0	1
33.19_914.4561n	Yes	1	#8461	2	33.1909	914.456	5.1013	ANIDAGIGGQ		P21292	Gamma-gliadin OS=Triticum aestivum OX=4565 PE=3 SV=1	1.03432	Condition 1	Condition 2	0.750905	26.5493	283.508	320.595	319.525	327.96	357.051	207.967	284.203	324.349	306.315	327.96	348.519	199.335	0	0	0	0	1	1
62.01_775.4238n	Yes	1	#3482	1	62.0061	775.424	6.699	FQLAQGL		P21292	Gamma-gliadin OS=Triticum aestivum OX=4565 PE=3 SV=1	2.20744	Condition 2	Condition 1	2.6e-06	3.44426	824.817	823.59	874.358	1845.07	1848.44	1875.35	826.839	833.236	838.21	1845.07	1804.27	1797.51	0	0	0	1	1	1
52.35_1864.9025n	Yes	1	#8815	2	52.3538	1864.9	5.4262	CQQPQRTIPQPHQTF	[1] Carbamidomethyl C	P21292	Gamma-gliadin OS=Triticum aestivum OX=4565 PE=3 SV=1	1.57663	Condition 1	Condition 2	0.00419188	11.858	1780.73	1599.62	1819.32	1245.14	1058.77	994.059	1785.09	1618.36	1744.1	1245.14	1033.47	952.802	0	0	0	1	1	1
54.16_1191.6615n	Yes	1	#2550	2	54.158	1191.66	6.6292	GIIQPQQPAQL		P21292	Gamma-gliadin OS=Triticum aestivum OX=4565 PE=3 SV=1	2.24251	Condition 2	Condition 1	0.00010599	8.46979	2020.26	2230	2394.56	4794.23	4986.39	5120.46	2025.22	2256.12	2295.56	4794.23	4867.23	4907.94	0	0	0	1	1	1
62.80_3298.6773n	Yes	1	#2971	3	62.8045	3298.68	5.04	QCAAIHSVAHSIIMQQEQQQGVPILRPLF	[2] Carbamidomethyl C	P21292	Gamma-gliadin OS=Triticum aestivum OX=4565 PE=3 SV=1	1.37503	Condition 2	Condition 1	0.00789725	11.6557	4738.26	4902.02	5853.06	7122.44	7110.22	7071.22	4749.88	4959.43	5611.08	7122.44	6940.3	6777.74	0	0	0	1	0	1
56.69_1360.6353n	Yes	1	#2536	2	56.6919	1360.64	5.7318	VPPDCSTINVPY	[5] Carbamidomethyl C	P21292	Gamma-gliadin OS=Triticum aestivum OX=4565 PE=3 SV=1	1.18601	Condition 2	Condition 1	0.000248058	1.72946	12264.3	12497.7	12094.1	14279.7	14711	14721	12294.4	12644.1	11594.1	14279.7	14359.5	14110.1	0	0	0	1	1	1
47.78_796.4454n	No	2	#4615,#7996	1,2	47.7775	796.445	6.5566	AQIPQQL		P21292	Gamma-gliadin OS=Triticum aestivum OX=4565 PE=3 SV=1	5.02304	Condition 2	Condition 1	3.98e-08	1.80515	903.419	926.777	896.159	4623.97	4470.74	4599.88	905.635	937.631	859.109	4623.97	4363.9	4408.97	1	1	2	2	2	2
65.48_797.4290n	No	2	#2226,#14640	1,2	65.4819	797.429	5.3678	AQIPQQL	[2] Deamidation Q	P21292	Gamma-gliadin OS=Triticum aestivum OX=4565 PE=3 SV=1	1.05427	Condition 2	Condition 1	0.124436	4.56745	2296.14	2252.65	2278.53	2512.55	2391.52	2293.79	2301.77	2279.03	2184.33	2512.55	2334.37	2198.59	1	1	1	1	1	0

## Sheet: GluPro v 1
																	Normalized abundance						Raw abundance						Spectral counts
							Best identification										Condition 1			Condition 2			Condition 1			Condition 2			Condition 1			Condition 2
Peptide identifier	Unique peptide?	Ions	Deconvoluted peptide ions	Deconvoluted charges	Retention time (min)	Neutral mass (Da)	Score	Sequence	Modifications	Accession	Description	Max fold change	Highest mean condition	Lowest mean condition	Anova	Maximum CV	UNIMAN_GLUTEN_005	UNIMAN_GLUTEN_006	UNIMAN_GLUTEN_007	UNIMAN_GLUTEN_020	UNIMAN_GLUTEN_021	UNIMAN_GLUTEN_022	UNIMAN_GLUTEN_005	UNIMAN_GLUTEN_006	UNIMAN_GLUTEN_007	UNIMAN_GLUTEN_020	UNIMAN_GLUTEN_021	UNIMAN_GLUTEN_022	UNIMAN_GLUTEN_005	UNIMAN_GLUTEN_006	UNIMAN_GLUTEN_007	UNIMAN_GLUTEN_020	UNIMAN_GLUTEN_021	UNIMAN_GLUTEN_022
60.12_1467.7874n	No	1	#11144	2	60.1172	1467.79	6.0372	QQQLIPCRDVVL	[7] Carbamidomethyl C	A0A023WGF7	Alpha-gliadin OS=Triticum aestivum OX=4565 GN=Glia PE=4 SV=1	17.6425	Condition 2	Condition 1	6.92e-05	30.1389	48.1694	40.7583	71.6601	939.026	994.79	899.353	48.2875	41.2356	68.6975	939.026	971.018	862.027	0	0	0	1	1	1
45.27_1491.6764n	No	1	#10404	2	45.2675	1491.68	6.0808	QQPQQQYPSGQGF		A0A023WGF7	Alpha-gliadin OS=Triticum aestivum OX=4565 GN=Glia PE=4 SV=1	4.08805	Condition 2	Condition 1	1.43e-05	9.2693	404.761	430.457	412.473	1881.25	1625.61	1593.75	405.754	435.499	395.42	1881.25	1586.77	1527.61	0	1	1	1	1	1
60.12_1467.7874n	No	1	#11144	2	60.1172	1467.79	6.0372	QQQLIPCRDVVL	[7] Carbamidomethyl C	A0A023WGG0	Alpha-gliadin OS=Triticum aestivum OX=4565 GN=Glia PE=4 SV=1	17.6425	Condition 2	Condition 1	6.92e-05	30.1389	48.1694	40.7583	71.6601	939.026	994.79	899.353	48.2875	41.2356	68.6975	939.026	971.018	862.027	0	0	0	1	1	1
40.14_1106.5064n	No	1	#6723	2	40.1391	1106.51	5.3887	QPFPSQQPY	[2] Hydroxyproline	A0A023WGG0	Alpha-gliadin OS=Triticum aestivum OX=4565 GN=Glia PE=4 SV=1	1.17619	Condition 2	Condition 1	0.0763159	10.7603	1124.11	1201.24	1090.29	1503.24	1280.92	1233.26	1126.87	1215.31	1045.21	1503.24	1250.31	1182.08	0	0	0	1	1	0
71.74_976.5063n	No	2	#4395,#12248	1,2	71.7386	976.506	5.9591	CTIAPVGIF	[1] Carbamidomethyl C	A0A023WGG0	Alpha-gliadin OS=Triticum aestivum OX=4565 GN=Glia PE=4 SV=1	1.28448	Condition 2	Condition 1	0.0335026	9.79034	1681.23	1656.21	1422.16	1820.8	2079.55	2213.24	1685.35	1675.61	1363.36	1820.8	2029.86	2121.38	2	2	2	1	2	2
45.81_728.4097n	No	1	#123	1	45.8101	728.41	6.3887	QLVQQL	[4] Deamidation Q	A0A023WGG0	Alpha-gliadin OS=Triticum aestivum OX=4565 GN=Glia PE=4 SV=1	1.90985	Condition 2	Condition 1	1.67e-05	4.21846	13113.5	13414.5	13621	24961	24913.2	26804.2	13145.6	13571.6	13057.9	24961	24317.9	25691.7	1	0	0	0	0	1
71.66_1177.5853n	No	1	#13558	2	71.6614	1177.59	5.5306	IPPYCTIAPF	[5] Carbamidomethyl C	A0A023WGX6	Alpha-gliadin OS=Triticum aestivum OX=4565 GN=Glia PE=4 SV=1	146.434	Condition 2	Condition 1	3.54e-05	46.6927	12.9111	6.06197	6.19343	1295	1138.93	1251.32	12.9428	6.13297	5.93738	1295	1111.71	1199.39	0	0	0	1	1	1
41.88_1625.7829n	No	1	#11240	2	41.8751	1625.78	6.1554	RPQQPYPQPQPQY		A0A023WGX6	Alpha-gliadin OS=Triticum aestivum OX=4565 GN=Glia PE=4 SV=1	4.60434	Condition 2	Condition 1	1.42e-05	8.63223	280.741	309.864	283.545	1424.28	1209.26	1391.34	281.429	313.494	271.822	1424.28	1180.36	1333.6	0	0	0	1	1	1
42.81_702.3344n	No	1	#7797	1	42.812	702.334	6.48	SQPQPF		A0A023WGX6	Alpha-gliadin OS=Triticum aestivum OX=4565 GN=Glia PE=4 SV=1	2.24481	Condition 2	Condition 1	2.27e-05	5.55007	598.188	644.326	667.623	1470.85	1395.55	1421.5	599.655	651.872	640.022	1470.85	1362.2	1362.5	0	1	0	0	1	1
74.47_1567.8395n	No	1	#3285	2	74.4689	1567.84	6.9199	LQLQPFPQPQLPY		A0A023WGX6	Alpha-gliadin OS=Triticum aestivum OX=4565 GN=Glia PE=4 SV=1	1.98735	Condition 2	Condition 1	0.000923729	12.2261	3033.09	3137.12	2481.11	5893.27	5892.47	5407.51	3040.53	3173.86	2378.54	5893.27	5751.65	5183.08	0	1	0	1	1	1
57.95_707.3328n	No	1	#1365	1	57.9537	707.333	6.9794	CTIAPF	[1] Carbamidomethyl C	A0A023WGX6	Alpha-gliadin OS=Triticum aestivum OX=4565 GN=Glia PE=4 SV=1	1.21577	Condition 2	Condition 1	0.000371476	3.01184	4162.29	4331.83	4416.9	5220.55	5253.08	5223.19	4172.5	4382.57	4234.3	5220.55	5127.55	5006.41	0	1	0	1	1	1
71.66_1177.5853n	No	1	#13558	2	71.6614	1177.59	5.5306	IPPYCTIAPF	[5] Carbamidomethyl C	A0A023WHQ9	Alpha-gliadin OS=Triticum aestivum OX=4565 GN=Glia PE=4 SV=1	146.434	Condition 2	Condition 1	3.54e-05	46.6927	12.9111	6.06197	6.19343	1295	1138.93	1251.32	12.9428	6.13297	5.93738	1295	1111.71	1199.39	0	0	0	1	1	1
41.88_1625.7829n	No	1	#11240	2	41.8751	1625.78	6.1554	RPQQPYPQPQPQY		A0A023WHQ9	Alpha-gliadin OS=Triticum aestivum OX=4565 GN=Glia PE=4 SV=1	4.60434	Condition 2	Condition 1	1.42e-05	8.63223	280.741	309.864	283.545	1424.28	1209.26	1391.34	281.429	313.494	271.822	1424.28	1180.36	1333.6	0	0	0	1	1	1
42.81_702.3344n	No	1	#7797	1	42.812	702.334	6.48	SQPQPF		A0A023WHQ9	Alpha-gliadin OS=Triticum aestivum OX=4565 GN=Glia PE=4 SV=1	2.24481	Condition 2	Condition 1	2.27e-05	5.55007	598.188	644.326	667.623	1470.85	1395.55	1421.5	599.655	651.872	640.022	1470.85	1362.2	1362.5	0	1	0	0	1	1
74.47_1567.8395n	No	1	#3285	2	74.4689	1567.84	6.9199	LQLQPFPQPQLPY		A0A023WHQ9	Alpha-gliadin OS=Triticum aestivum OX=4565 GN=Glia PE=4 SV=1	1.98735	Condition 2	Condition 1	0.000923729	12.2261	3033.09	3137.12	2481.11	5893.27	5892.47	5407.51	3040.53	3173.86	2378.54	5893.27	5751.65	5183.08	0	1	0	1	1	1
57.95_707.3328n	No	1	#1365	1	57.9537	707.333	6.9794	CTIAPF	[1] Carbamidomethyl C	A0A023WHQ9	Alpha-gliadin OS=Triticum aestivum OX=4565 GN=Glia PE=4 SV=1	1.21577	Condition 2	Condition 1	0.000371476	3.01184	4162.29	4331.83	4416.9	5220.55	5253.08	5223.19	4172.5	4382.57	4234.3	5220.55	5127.55	5006.41	0	1	0	1	1	1
28.08_1083.5262n	No	1	#9068	2	28.0805	1083.53	5.6916	GQGQQPRQW		A0MZ38	High molecular weight glutenin subunit OS=Triticum aestivum OX=4565 GN=Glu-1Ax PE=4 SV=1	1.13917	Condition 1	Condition 2	0.208436	13.521	444.02	494.969	579.516	416.983	462.891	453.123	445.109	500.766	555.557	416.983	451.83	434.317	0	0	1	0	1	1
45.76_1345.6131n	No	1	#7011	2	45.7587	1345.61	5.0208	YPTSPWQPEQL	[7] Deamidation Q	A0MZ38	High molecular weight glutenin subunit OS=Triticum aestivum OX=4565 GN=Glu-1Ax PE=4 SV=1	3.24424	Condition 2	Condition 1	3.38e-05	9.12589	1052.19	945.45	1135.6	3515.48	3252.97	3396.52	1054.77	956.523	1088.65	3515.48	3175.24	3255.55	0	0	0	1	1	0
40.90_1179.5652n	No	1	#7001	2	40.904	1179.57	5.5102	QPGQWLQSGY	[N-term] Pyroglutamic acid	A0MZ38	High molecular weight glutenin subunit OS=Triticum aestivum OX=4565 GN=Glu-1Ax PE=4 SV=1	1.16727	Condition 2	Condition 1	0.156613	13.3999	1445.72	1333.88	1461.75	1748.86	1396.99	1804.97	1449.27	1349.5	1401.32	1748.86	1363.61	1730.05	0	1	0	1	0	0
36.21_666.3126n	No	1	#5581	1	36.2053	666.313	5.3231	YPTSSL		A0MZ38	High molecular weight glutenin subunit OS=Triticum aestivum OX=4565 GN=Glu-1Ax PE=4 SV=1	1.24648	Condition 2	Condition 1	0.0174223	8.68354	1444.04	1506.21	1398.46	1625.7	1899.53	1895.35	1447.58	1523.85	1340.64	1625.7	1854.14	1816.68	0	1	0	1	1	0
41.67_1517.7112n	No	1	#4906	2	41.6694	1517.71	5.8595	YPTSPQQSGQGQQL		A0MZ38	High molecular weight glutenin subunit OS=Triticum aestivum OX=4565 GN=Glu-1Ax PE=4 SV=1	1.32337	Condition 2	Condition 1	0.00390305	7.90444	2525.25	2854.07	2472.18	3530.51	3365.51	3494.43	2531.44	2887.49	2369.97	3530.51	3285.09	3349.4	1	1	0	0	1	1
49.36_856.4447n	No	1	#1354	2	49.3567	856.445	5.4245	LQPGQWL	[3] Hydroxyproline	A0MZ38	High molecular weight glutenin subunit OS=Triticum aestivum OX=4565 GN=Glu-1Ax PE=4 SV=1	1.29565	Condition 1	Condition 2	0.000229367	2.82302	5142.27	5062.64	5286.32	4105.78	3967.67	3882.88	5154.88	5121.93	5067.77	4105.78	3872.86	3721.73	0	1	1	1	0	0
43.14_1803.7711n	No	2	#11028,#2263	2,3	43.1377	1803.77	5.0469	GYYPTSPQQSGQGQSGY		A0MZ38	High molecular weight glutenin subunit OS=Triticum aestivum OX=4565 GN=Glu-1Ax PE=4 SV=1	2.19387	Condition 1	Condition 2	2.06e-06	2.84543	7970.04	7603.85	7577.01	3449.24	3543.85	3559.43	7989.59	7692.9	7263.75	3449.24	3459.17	3411.7	0	2	0	0	0	2
52.17_2160.9813n	No	2	#12781,#2422	2,3	52.1652	2160.98	5.0852	LTSPQQSGQWQQPGQGQSGY		A0MZ38	High molecular weight glutenin subunit OS=Triticum aestivum OX=4565 GN=Glu-1Ax PE=4 SV=1	1.78475	Condition 1	Condition 2	4.57e-06	2.86992	8836.84	8739.44	8701.55	4886.88	4778.63	5057.99	8858.51	8841.8	8341.8	4886.88	4664.44	4848.06	0	0	0	2	0	2
37.14_1225.5408n	No	1	#11921	2	37.1416	1225.54	5.3402	QTLPTMCNVY	[7] Carbamidomethyl C	A1EHE7	Gamma gliadin-D3 OS=Triticum aestivum OX=4565 GN=Gli-1 PE=2 SV=1	1.33358	Condition 1	Condition 2	0.017752	11.2855	482.608	499.602	544.521	383.299	337.726	423.809	483.792	505.453	522.009	383.299	329.655	406.22	1	0	1	0	0	0
43.73_873.4579n	No	1	#7016	1	43.7314	873.458	5.9615	SSVVAGIGGQ		A1EHE7	Gamma gliadin-D3 OS=Triticum aestivum OX=4565 GN=Gli-1 PE=2 SV=1	1.61558	Condition 2	Condition 1	0.00274959	10.7689	453.138	517.569	562.654	795.327	793.621	888.326	454.25	523.631	539.392	795.327	774.656	851.457	1	1	1	1	1	1
47.78_796.4454n	No	2	#4615,#7996	1,2	47.7775	796.445	6.8429	AQIPQQL		A1EHE7	Gamma gliadin-D3 OS=Triticum aestivum OX=4565 GN=Gli-1 PE=2 SV=1	5.02304	Condition 2	Condition 1	3.98e-08	1.80515	903.419	926.777	896.159	4623.97	4470.74	4599.88	905.635	937.631	859.109	4623.97	4363.9	4408.97	1	1	2	2	2	2
61.97_687.3942n	No	1	#7339	1	61.9718	687.394	5.8045	EAIRSL		A1EHE7	Gamma gliadin-D3 OS=Triticum aestivum OX=4565 GN=Gli-1 PE=2 SV=1	1.1196	Condition 1	Condition 2	0.146969	9.01915	905.32	954.64	1076.82	818.963	880.402	923.699	907.54	965.821	1032.3	818.963	859.364	885.362	0	1	0	1	0	0
54.14_1603.8682n	No	1	#2041	2	54.1409	1603.87	7.5784	VQGQGIIQPQQPAQL		A1EHE7	Gamma gliadin-D3 OS=Triticum aestivum OX=4565 GN=Gli-1 PE=2 SV=1	1.41391	Condition 2	Condition 1	0.00180503	8.0303	4394.52	4450.73	5065.74	6616.79	6388.37	6663.66	4405.3	4502.85	4856.31	6616.79	6235.71	6387.1	1	1	1	1	1	1
58.57_1289.6612n	No	1	#11611	2	58.5709	1289.66	6.0795	SIILQEQQQGF		A2IBK0	LMW-m1 glutenin subunit OS=Triticum zhukovskyi OX=77602 GN=LMW-m1 PE=4 SV=1	182.503	Condition 2	Condition 1	0.00280998	101.185	4.35437	0	9.0203	816.756	841.585	782.583	4.36505	0	8.64737	816.756	821.474	750.103	0	0	0	1	1	1
55.51_987.4509n	No	1	#22119	1	55.5051	987.451	5.7255	YSSTTSVPF		A2IBK0	LMW-m1 glutenin subunit OS=Triticum zhukovskyi OX=77602 GN=LMW-m1 PE=4 SV=1	3.46941	Condition 2	Condition 1	0.0438731	60.3092	43.2865	9.56597	41.4029	111.435	104.069	111.506	43.3926	9.67801	39.6912	111.435	101.582	106.879	0	0	0	1	0	1
52.06_824.3911n	No	1	#7489	1	52.0624	824.391	6.0942	SSTTSVPF		A2IBK0	LMW-m1 glutenin subunit OS=Triticum zhukovskyi OX=77602 GN=LMW-m1 PE=4 SV=1	2.51983	Condition 2	Condition 1	5.18e-06	4.38661	340.953	312.338	328.756	821.459	843.882	809.246	341.789	315.996	315.164	821.459	823.716	775.66	1	1	0	1	1	1
59.66_1472.7985n	Yes	1	#9057	2	59.6613	1472.8	5.0398	SQQQPILPQQPPL		A2IBK0	LMW-m1 glutenin subunit OS=Triticum zhukovskyi OX=77602 GN=LMW-m1 PE=4 SV=1	3.18326	Condition 1	Condition 2	0.00286172	28.4761	764.713	781.054	800.042	297.203	273.699	166.018	766.588	790.202	766.966	297.203	267.158	159.128	1	0	0	0	1	1
51.98_1132.5769n	No	1	#1421	2	51.9766	1132.58	7.6263	QQLNPCKVF	[6] Carbamidomethyl C	A2IBK0	LMW-m1 glutenin subunit OS=Triticum zhukovskyi OX=77602 GN=LMW-m1 PE=4 SV=1	10.3262	Condition 2	Condition 1	3.54e-07	5.23417	1533.53	1701.68	1639.93	17179.3	16122.3	17040	1537.29	1721.61	1572.13	17179.3	15737.1	16332.7	1	1	1	1	1	1
48.74_1569.7956n	Yes	1	#1505	2	48.7396	1569.8	5.7426	QQRCSPVAMPQRL	[4] Carbamidomethyl C	A2IBK0	LMW-m1 glutenin subunit OS=Triticum zhukovskyi OX=77602 GN=LMW-m1 PE=4 SV=1	8.45035	Condition 2	Condition 1	1.39e-07	4.24911	2653.98	2760.43	2888.85	23222.2	23104.6	23838.6	2660.49	2792.76	2769.42	23222.2	22552.4	22849.3	0	0	0	1	1	1
32.83_868.4412n	No	2	#6522,#3366	1,2	32.8309	868.441	7.9564	QQPQQQL		A2IBK0	LMW-m1 glutenin subunit OS=Triticum zhukovskyi OX=77602 GN=LMW-m1 PE=4 SV=1	1.79772	Condition 2	Condition 1	6.17e-05	5.5674	3861.32	4301.95	4191.59	7383.29	7510.18	7317.1	3870.79	4352.34	4018.3	7383.29	7330.71	7013.42	2	0	0	2	0	0
43.84_830.3959n	No	2	#2756,#1611	1,2	43.8428	830.396	7.5811	SQQQPPF		A2IBK0	LMW-m1 glutenin subunit OS=Triticum zhukovskyi OX=77602 GN=LMW-m1 PE=4 SV=1	1.25905	Condition 1	Condition 2	0.00123527	4.28668	9560.7	10317.9	10296.7	7785.57	8063.56	8117.66	9584.14	10438.7	9870.99	7785.57	7870.86	7780.75	2	2	0	2	2	2
42.17_704.3688n	No	1	#5619	1	42.1666	704.369	5.0954	ARSQML		A2IBK1	LMW-m2 glutenin subunit OS=Triticum zhukovskyi OX=77602 GN=LMW-m2 PE=4 SV=1	1.24367	Condition 2	Condition 1	0.00390763	5.25972	538.652	505.579	507.467	619.305	681.971	628.527	539.973	511.501	486.487	619.305	665.674	602.441	0	0	0	1	1	0
63.51_804.4382n	Yes	1	#7769	1	63.5074	804.438	5.2505	GATTIVPF		A2IBK1	LMW-m2 glutenin subunit OS=Triticum zhukovskyi OX=77602 GN=LMW-m2 PE=4 SV=1	1.05645	Condition 2	Condition 1	0.327682	7.13488	487.572	509.753	532.465	536.12	578.381	501.639	488.768	515.723	510.451	536.12	564.559	480.819	0	1	0	0	1	0
40.34_1712.8102n	No	1	#9115	2	40.3448	1712.81	6.2686	SQQQQQFPQQQQPL	[5] Deamidation Q	A2IBK1	LMW-m2 glutenin subunit OS=Triticum zhukovskyi OX=77602 GN=LMW-m2 PE=4 SV=1	1.03566	Condition 2	Condition 1	0.71812	11.3455	848.824	737.694	926.831	767.809	952.058	883.121	850.905	746.334	888.513	767.809	929.307	846.468	1	1	1	0	0	0
27.89_996.4985n	No	1	#10628	2	27.8919	996.499	5.4694	QQPQQQQL		A2IBK1	LMW-m2 glutenin subunit OS=Triticum zhukovskyi OX=77602 GN=LMW-m2 PE=4 SV=1	1.16306	Condition 2	Condition 1	0.182399	14.0156	940.657	1017.78	1038.28	973.813	1252.21	1259.34	942.963	1029.7	995.357	973.813	1222.29	1207.08	0	0	0	1	0	1
72.53_1575.6979n	No	1	#6639	2	72.5285	1575.7	5.4433	GQCSFQQPQQQQL	[3] Carbamidomethyl C	A2IBK1	LMW-m2 glutenin subunit OS=Triticum zhukovskyi OX=77602 GN=LMW-m2 PE=4 SV=1	2.78564	Condition 2	Condition 1	0.000182159	9.61431	1251.02	1174.5	1032.61	3305.46	3434.86	2892.77	1254.09	1188.26	989.915	3305.46	3352.77	2772.71	1	1	0	0	0	0
54.58_822.4600n	No	2	#6995,#7862	1,2	54.5781	822.46	7.0262	QQQPLPL		A2IBK1	LMW-m2 glutenin subunit OS=Triticum zhukovskyi OX=77602 GN=LMW-m2 PE=4 SV=1	2.20319	Condition 1	Condition 2	0.000561751	10.4602	1774.39	1661.93	1440.23	674.593	738.963	799.849	1778.74	1681.39	1380.68	674.593	721.304	766.652	2	2	2	0	2	2
51.98_1132.5769n	No	1	#1421	2	51.9766	1132.58	7.6263	QQLNPCKVF	[6] Carbamidomethyl C	A2IBK1	LMW-m2 glutenin subunit OS=Triticum zhukovskyi OX=77602 GN=LMW-m2 PE=4 SV=1	10.3262	Condition 2	Condition 1	3.54e-07	5.23417	1533.53	1701.68	1639.93	17179.3	16122.3	17040	1537.29	1721.61	1572.13	17179.3	15737.1	16332.7	1	1	1	1	1	1
48.30_1046.5927n	No	1	#1587	2	48.3004	1046.59	7.525	LQPHQIAQL		A2IBK1	LMW-m2 glutenin subunit OS=Triticum zhukovskyi OX=77602 GN=LMW-m2 PE=4 SV=1	4.13715	Condition 2	Condition 1	1.32e-05	8.55766	1833.09	1891.29	2001.53	8675.71	7538.52	7474.68	1837.58	1913.44	1918.78	8675.71	7358.37	7164.46	1	1	1	1	1	1
43.65_1086.5264n	No	1	#6742	2	43.6457	1086.53	5.6973	SQQQQQPPF		A2IBK1	LMW-m2 glutenin subunit OS=Triticum zhukovskyi OX=77602 GN=LMW-m2 PE=4 SV=1	1.18687	Condition 2	Condition 1	0.009569	4.72778	2132.86	2294.11	2301.78	2565.48	2804.39	2616.31	2138.09	2320.98	2206.62	2565.48	2737.38	2507.72	1	0	0	1	1	1
60.29_1595.7570n	No	1	#4627	2	60.2886	1595.76	5.6698	GQWPQQQQVPQGTL	[2] Deamidation Q|[11] Deamidation Q	A2IBK1	LMW-m2 glutenin subunit OS=Triticum zhukovskyi OX=77602 GN=LMW-m2 PE=4 SV=1	1.3531	Condition 1	Condition 2	0.00168928	6.43022	3320.32	3147.21	3197.22	2226.61	2532.77	2383.29	3328.47	3184.07	3065.03	2226.61	2472.25	2284.38	0	1	1	0	0	0
31.47_933.5079n	No	1	#1490	2	31.4657	933.508	6.2321	QPHQIAQL		A2IBK1	LMW-m2 glutenin subunit OS=Triticum zhukovskyi OX=77602 GN=LMW-m2 PE=4 SV=1	1.1173	Condition 1	Condition 2	0.016643	4.18749	4152.71	4487.04	4447.46	3805.14	3927.09	3980.99	4162.89	4539.59	4263.59	3805.14	3833.25	3815.76	1	1	1	1	1	1
60.41_1620.8255n	No	1	#2953	2	60.4086	1620.83	7.2832	SQQQQPVLPQQPPF		A2IBK1	LMW-m2 glutenin subunit OS=Triticum zhukovskyi OX=77602 GN=LMW-m2 PE=4 SV=1	1.77886	Condition 1	Condition 2	0.000468958	9.53059	4940.46	4887.83	4732.42	2596.23	3028.06	2561.13	4952.58	4945.08	4536.77	2596.23	2955.7	2454.84	1	1	1	1	1	1
43.84_830.3959n	No	2	#2756,#1611	1,2	43.8428	830.396	7.5811	SQQQPPF		A2IBK1	LMW-m2 glutenin subunit OS=Triticum zhukovskyi OX=77602 GN=LMW-m2 PE=4 SV=1	1.25905	Condition 1	Condition 2	0.00123527	4.28668	9560.7	10317.9	10296.7	7785.57	8063.56	8117.66	9584.14	10438.7	9870.99	7785.57	7870.86	7780.75	2	2	0	2	2	2
43.79_958.4549n	No	2	#4611,#1021	1,2	43.7914	958.455	7.6329	SQQQQPPF		A2IBK1	LMW-m2 glutenin subunit OS=Triticum zhukovskyi OX=77602 GN=LMW-m2 PE=4 SV=1	1.19987	Condition 1	Condition 2	0.00159236	3.04223	13729	14271.7	14502.2	11465.5	11775.7	12181.8	13762.6	14438.9	13902.7	11465.5	11494.3	11676.2	1	2	2	2	2	2
46.26_1593.7920n	No	1	#1037	2	46.2559	1593.79	5.281	GQWPQQQQVPQGTL		A2IBK1	LMW-m2 glutenin subunit OS=Triticum zhukovskyi OX=77602 GN=LMW-m2 PE=4 SV=1	1.14091	Condition 1	Condition 2	0.00628391	3.73898	30617.6	28934.7	28554.1	26355.7	25668.4	25200.3	30692.6	29273.6	27373.6	26355.7	25055	24154.4	0	0	0	1	1	1
57.57_1770.8347n	No	2	#382,#20959	2,3	57.5747	1770.83	7.9101	SQQQQPPFSQQQPPF		A2IBK1	LMW-m2 glutenin subunit OS=Triticum zhukovskyi OX=77602 GN=LMW-m2 PE=4 SV=1	1.3931	Condition 1	Condition 2	0.000332537	4.30084	41774.2	39762.2	38354.4	28826.3	27885.7	29348.5	41876.7	40227.9	36768.7	28826.3	27219.3	28130.4	2	2	2	2	1	1
42.76_2778.3114n	No	1	#5862	3	42.7606	2778.31	6.8719	GQCVSQPQQQSQQQLGQQPQQQQL	[3] Carbamidomethyl C	A2IBV5	Glutenin subunit OS=Triticum aestivum OX=4565 GN=LMW-s1 PE=4 SV=1	126.956	Condition 2	Condition 1	0.0163512	88.1445	48.2818	0	38.7569	3599.46	3932.7	3517.89	48.4002	0	37.1545	3599.46	3838.72	3371.88	0	0	0	1	1	1
61.48_1053.5259n	No	1	#21550	2	61.4816	1053.53	5.4752	GQQPQQQQL		A2IBV5	Glutenin subunit OS=Triticum aestivum OX=4565 GN=LMW-s1 PE=4 SV=1	2.42881	Condition 1	Condition 2	0.27571	98.8343	45.1982	101.877	118.485	0	72.0265	37.3112	45.3091	103.071	113.587	0	70.3053	35.7626	1	1	0	0	0	0
32.42_1053.5224n	No	1	#10237	2	32.4194	1053.52	6.624	GQQPQQQQL		A2IBV5	Glutenin subunit OS=Triticum aestivum OX=4565 GN=LMW-s1 PE=4 SV=1	14.4311	Condition 2	Condition 1	0.000314265	43.2947	134.387	115.008	247.852	2413.93	2439.62	2322.28	134.716	116.355	237.605	2413.93	2381.32	2225.89	0	0	0	1	1	1
36.83_1742.8022n	No	1	#3735	2	36.833	1742.8	7.6797	GQCVSQPQQQSQQQL	[3] Carbamidomethyl C	A2IBV5	Glutenin subunit OS=Triticum aestivum OX=4565 GN=LMW-s1 PE=4 SV=1	10.485	Condition 2	Condition 1	4.94e-06	10.9553	419.589	336.707	386.867	3966.28	3801.61	4218.22	420.618	340.65	370.873	3966.28	3710.76	4043.15	0	0	0	1	1	1
42.17_704.3688n	No	1	#5619	1	42.1666	704.369	5.0954	ARSQML		A2IBV5	Glutenin subunit OS=Triticum aestivum OX=4565 GN=LMW-s1 PE=4 SV=1	1.24367	Condition 2	Condition 1	0.00390763	5.25972	538.652	505.579	507.467	619.305	681.971	628.527	539.973	511.501	486.487	619.305	665.674	602.441	0	0	0	1	1	0
35.52_872.4738n	No	1	#3070	2	35.5196	872.474	5.816	LQQQIPF		A2IBV5	Glutenin subunit OS=Triticum aestivum OX=4565 GN=LMW-s1 PE=4 SV=1	4.12526	Condition 2	Condition 1	5.08e-05	12.292	512.98	652.159	622.047	2350.57	2547.34	2474.69	514.238	659.797	596.33	2350.57	2486.47	2371.98	0	0	1	1	0	1
50.68_759.3922n	No	1	#8490	1	50.6802	759.392	6.572	QQQIPF		A2IBV5	Glutenin subunit OS=Triticum aestivum OX=4565 GN=LMW-s1 PE=4 SV=1	1.34186	Condition 2	Condition 1	0.0396424	12.5066	574.695	714.399	725.282	908.425	799.765	994.825	576.104	722.766	695.297	908.425	780.654	953.537	0	0	1	1	0	0
48.30_1046.5927n	No	1	#1587	2	48.3004	1046.59	7.525	LQPHQIAQL		A2IBV5	Glutenin subunit OS=Triticum aestivum OX=4565 GN=LMW-s1 PE=4 SV=1	4.13715	Condition 2	Condition 1	1.32e-05	8.55766	1833.09	1891.29	2001.53	8675.71	7538.52	7474.68	1837.58	1913.44	1918.78	8675.71	7358.37	7164.46	1	1	1	1	1	1
56.08_1898.8836n	No	1	#7197	2	56.0815	1898.88	6.9183	SQQQQPPFSQQQQPPF		A2IBV5	Glutenin subunit OS=Triticum aestivum OX=4565 GN=LMW-s1 PE=4 SV=1	1.35294	Condition 1	Condition 2	7.39e-05	2.9623	2041.16	2023.78	2003.68	1508.95	1445.63	1530.93	2046.16	2047.49	1920.84	1508.95	1411.08	1467.39	1	1	1	1	0	1
31.47_933.5079n	No	1	#1490	2	31.4657	933.508	6.2321	QPHQIAQL		A2IBV5	Glutenin subunit OS=Triticum aestivum OX=4565 GN=LMW-s1 PE=4 SV=1	1.1173	Condition 1	Condition 2	0.016643	4.18749	4152.71	4487.04	4447.46	3805.14	3927.09	3980.99	4162.89	4539.59	4263.59	3805.14	3833.25	3815.76	1	1	1	1	1	1
64.03_1534.8522n	No	1	#1436	2	64.0317	1534.85	6.1501	LQQQIPFVHPSIL	[10] Hydroxyproline	A2IBV5	Glutenin subunit OS=Triticum aestivum OX=4565 GN=LMW-s1 PE=4 SV=1	1.83587	Condition 2	Condition 1	2.47e-05	3.48756	5292.12	5118.52	4935.36	9113.47	9716.91	9342.94	5305.1	5178.47	4731.32	9113.47	9484.7	8955.18	0	0	1	1	0	0
45.96_664.3942n	No	2	#563,#2312	1,2	45.9558	664.394	7.5806	VHPSIL		A2IBV5	Glutenin subunit OS=Triticum aestivum OX=4565 GN=LMW-s1 PE=4 SV=1	1.94431	Condition 2	Condition 1	1.56e-06	2.27569	5811.99	6082.51	5959.01	11483.4	11490.2	11739.1	5826.24	6153.75	5712.65	11483.4	11215.6	11251.9	2	1	2	0	0	2
43.79_958.4549n	No	2	#4611,#1021	1,2	43.7914	958.455	7.6329	SQQQQPPF		A2IBV5	Glutenin subunit OS=Triticum aestivum OX=4565 GN=LMW-s1 PE=4 SV=1	1.19987	Condition 1	Condition 2	0.00159236	3.04223	13729	14271.7	14502.2	11465.5	11775.7	12181.8	13762.6	14438.9	13902.7	11465.5	11494.3	11676.2	1	2	2	2	2	2
51.47_943.4805n	No	2	#1283,#808	1,2	51.4688	943.481	6.478	SQQQLPPF		A2IBV5	Glutenin subunit OS=Triticum aestivum OX=4565 GN=LMW-s1 PE=4 SV=1	1.20854	Condition 2	Condition 1	0.000926353	3.04754	18684	18177.3	17579.2	21856.4	21498.8	22438.5	18729.8	18390.2	16852.4	21856.4	20985.1	21507.3	2	0	2	2	0	0
42.76_2778.3114n	No	1	#5862	3	42.7606	2778.31	6.8719	GQCVSQPQQQSQQQLGQQPQQQQL	[3] Carbamidomethyl C	A2IBV6	Glutenin subunit OS=Triticum aestivum OX=4565 GN=LMW-3 PE=4 SV=1	126.956	Condition 2	Condition 1	0.0163512	88.1445	48.2818	0	38.7569	3599.46	3932.7	3517.89	48.4002	0	37.1545	3599.46	3838.72	3371.88	0	0	0	1	1	1
61.48_1053.5259n	No	1	#21550	2	61.4816	1053.53	5.4752	GQQPQQQQL		A2IBV6	Glutenin subunit OS=Triticum aestivum OX=4565 GN=LMW-3 PE=4 SV=1	2.42881	Condition 1	Condition 2	0.27571	98.8343	45.1982	101.877	118.485	0	72.0265	37.3112	45.3091	103.071	113.587	0	70.3053	35.7626	1	1	0	0	0	0
32.42_1053.5224n	No	1	#10237	2	32.4194	1053.52	6.624	GQQPQQQQL		A2IBV6	Glutenin subunit OS=Triticum aestivum OX=4565 GN=LMW-3 PE=4 SV=1	14.4311	Condition 2	Condition 1	0.000314265	43.2947	134.387	115.008	247.852	2413.93	2439.62	2322.28	134.716	116.355	237.605	2413.93	2381.32	2225.89	0	0	0	1	1	1
36.83_1742.8022n	No	1	#3735	2	36.833	1742.8	7.6797	GQCVSQPQQQSQQQL	[3] Carbamidomethyl C	A2IBV6	Glutenin subunit OS=Triticum aestivum OX=4565 GN=LMW-3 PE=4 SV=1	10.485	Condition 2	Condition 1	4.94e-06	10.9553	419.589	336.707	386.867	3966.28	3801.61	4218.22	420.618	340.65	370.873	3966.28	3710.76	4043.15	0	0	0	1	1	1
37.23_849.3933n	No	1	#8404	2	37.2273	849.393	5.217	FPQQPSF		A2IBV6	Glutenin subunit OS=Triticum aestivum OX=4565 GN=LMW-3 PE=4 SV=1	1.17374	Condition 2	Condition 1	0.442196	25.6907	344.586	357.231	362.695	298.551	507.346	443.559	345.431	361.415	347.7	298.551	495.222	425.15	0	1	1	0	0	0
42.17_704.3688n	No	1	#5619	1	42.1666	704.369	5.0954	ARSQML		A2IBV6	Glutenin subunit OS=Triticum aestivum OX=4565 GN=LMW-3 PE=4 SV=1	1.24367	Condition 2	Condition 1	0.00390763	5.25972	538.652	505.579	507.467	619.305	681.971	628.527	539.973	511.501	486.487	619.305	665.674	602.441	0	0	0	1	1	0
68.49_2232.1276n	No	1	#11187	3	68.4941	2232.13	5.8647	QQQPPFSQQQPILPQQPPF		A2IBV6	Glutenin subunit OS=Triticum aestivum OX=4565 GN=LMW-3 PE=4 SV=1	1.49376	Condition 1	Condition 2	0.00372804	10.5689	1041.29	994.416	966.987	712.362	709.497	588.296	1043.85	1006.06	927.009	712.362	692.542	563.879	1	1	1	1	1	1
44.01_743.3620n	No	1	#7023	2	44.0057	743.362	6.9742	QQQPPF		A2IBV6	Glutenin subunit OS=Triticum aestivum OX=4565 GN=LMW-3 PE=4 SV=1	1.19507	Condition 1	Condition 2	0.0426256	9.46627	928.685	1094.36	1104.42	900.78	840.345	875.838	930.963	1107.18	1058.76	900.78	820.263	839.488	1	1	1	1	1	1
46.86_907.4772n	No	2	#7473,#2666	1,2	46.8581	907.477	6.7251	RTTTSVPF		A2IBV6	Glutenin subunit OS=Triticum aestivum OX=4565 GN=LMW-3 PE=4 SV=1	2.87302	Condition 2	Condition 1	1.14e-05	5.20525	1285.98	1361.45	1227.34	3623.85	3607.56	3900.87	1289.13	1377.39	1176.59	3623.85	3521.35	3738.97	1	0	2	2	2	0
51.98_1132.5769n	No	1	#1421	2	51.9766	1132.58	7.6263	QQLNPCKVF	[6] Carbamidomethyl C	A2IBV6	Glutenin subunit OS=Triticum aestivum OX=4565 GN=LMW-3 PE=4 SV=1	10.3262	Condition 2	Condition 1	3.54e-07	5.23417	1533.53	1701.68	1639.93	17179.3	16122.3	17040	1537.29	1721.61	1572.13	17179.3	15737.1	16332.7	1	1	1	1	1	1
48.30_1046.5927n	No	1	#1587	2	48.3004	1046.59	7.525	LQPHQIAQL		A2IBV6	Glutenin subunit OS=Triticum aestivum OX=4565 GN=LMW-3 PE=4 SV=1	4.13715	Condition 2	Condition 1	1.32e-05	8.55766	1833.09	1891.29	2001.53	8675.71	7538.52	7474.68	1837.58	1913.44	1918.78	8675.71	7358.37	7164.46	1	1	1	1	1	1
63.27_1506.7846n	No	1	#4386	2	63.2674	1506.78	7.1074	SQQQPILPQQPPF		A2IBV6	Glutenin subunit OS=Triticum aestivum OX=4565 GN=LMW-3 PE=4 SV=1	1.28214	Condition 1	Condition 2	3.89e-06	1.05474	2732.64	2698.03	2676.11	2119.43	2109.87	2093.55	2739.34	2729.63	2565.47	2119.43	2059.45	2006.66	1	1	1	1	1	1
56.12_1086.5364n	No	1	#2114	2	56.1157	1086.54	6.7688	YRTTTSVPF	[8] Hydroxyproline	A2IBV6	Glutenin subunit OS=Triticum aestivum OX=4565 GN=LMW-3 PE=4 SV=1	1.09696	Condition 1	Condition 2	0.0215106	4.25025	3654.63	3530.08	3357.23	3183.71	3192.8	3233.67	3663.6	3571.42	3218.43	3183.71	3116.5	3099.47	0	0	1	0	1	0
31.47_933.5079n	No	1	#1490	2	31.4657	933.508	6.2321	QPHQIAQL		A2IBV6	Glutenin subunit OS=Triticum aestivum OX=4565 GN=LMW-3 PE=4 SV=1	1.1173	Condition 1	Condition 2	0.016643	4.18749	4152.71	4487.04	4447.46	3805.14	3927.09	3980.99	4162.89	4539.59	4263.59	3805.14	3833.25	3815.76	1	1	1	1	1	1
42.10_1874.9409n	No	2	#8840,#3445	2,3	42.098	1874.94	6.0283	QQQPLPPQQTFPQQPL	[14] Deamidation Q	A2IBV6	Glutenin subunit OS=Triticum aestivum OX=4565 GN=LMW-3 PE=4 SV=1	1.30356	Condition 2	Condition 1	0.000457195	4.18768	5139.22	5411.78	4983.36	6837.7	6748.52	6663.71	5151.83	5475.16	4777.33	6837.7	6587.25	6387.14	0	0	2	2	0	0
67.56_1447.8426n	No	1	#1011	2	67.5586	1447.84	7.8316	VQQQIPVVQPSIL		A2IBV6	Glutenin subunit OS=Triticum aestivum OX=4565 GN=LMW-3 PE=4 SV=1	1.0219	Condition 2	Condition 1	0.471495	4.23413	9613.62	9645.8	9317.9	10184.5	9643.11	9375.48	9637.19	9758.77	8932.67	10184.5	9412.67	8986.36	1	1	1	1	1	1
58.54_1873.9670n	No	1	#4253	2	58.5367	1873.97	6.2025	QQQPLPPQQTFPQQPL		A2IBV6	Glutenin subunit OS=Triticum aestivum OX=4565 GN=LMW-3 PE=4 SV=1	1.19639	Condition 1	Condition 2	0.0248533	8.79797	19124.6	16944.9	16169.9	14632.3	14680.1	14351.7	19171.5	17143.3	15501.3	14632.3	14329.3	13756.1	1	1	1	1	0	1
46.02_2359.1468n	No	1	#2080	3	46.0158	2359.15	6.4457	LQQQCSPVAMPQRLARSQML	[5] Carbamidomethyl C|[10] Oxidation M|[12] Deamidation Q|[18] Deamidation Q	A2IBV6	Glutenin subunit OS=Triticum aestivum OX=4565 GN=LMW-3 PE=4 SV=1	1.04025	Condition 2	Condition 1	0.0942674	2.84545	18839.4	18064.6	19081	19455	19641.3	19142.2	18885.6	18276.2	18292.1	19455	19172	18347.7	0	0	0	1	1	0
42.76_2778.3114n	No	1	#5862	3	42.7606	2778.31	6.8719	GQCVSQPQQQSQQQLGQQPQQQQL	[3] Carbamidomethyl C	A2IBV7	Glutenin subunit OS=Triticum aestivum OX=4565 GN=LMW-m1 PE=4 SV=1	126.956	Condition 2	Condition 1	0.0163512	88.1445	48.2818	0	38.7569	3599.46	3932.7	3517.89	48.4002	0	37.1545	3599.46	3838.72	3371.88	0	0	0	1	1	1
45.01_2220.0981n	No	1	#13832	3	45.0104	2220.1	6.0076	SQQQPILPQQPPFSQQQQL	[2] Deamidation Q	A2IBV7	Glutenin subunit OS=Triticum aestivum OX=4565 GN=LMW-m1 PE=4 SV=1	75.9393	Condition 2	Condition 1	0.0117185	120.612	28.3621	8.00774	0	926.091	948.292	887.519	28.4317	8.10153	0	926.091	925.631	850.684	0	0	0	1	0	1
61.48_1053.5259n	No	1	#21550	2	61.4816	1053.53	5.4752	GQQPQQQQL		A2IBV7	Glutenin subunit OS=Triticum aestivum OX=4565 GN=LMW-m1 PE=4 SV=1	2.42881	Condition 1	Condition 2	0.27571	98.8343	45.1982	101.877	118.485	0	72.0265	37.3112	45.3091	103.071	113.587	0	70.3053	35.7626	1	1	0	0	0	0
32.42_1053.5224n	No	1	#10237	2	32.4194	1053.52	6.624	GQQPQQQQL		A2IBV7	Glutenin subunit OS=Triticum aestivum OX=4565 GN=LMW-m1 PE=4 SV=1	14.4311	Condition 2	Condition 1	0.000314265	43.2947	134.387	115.008	247.852	2413.93	2439.62	2322.28	134.716	116.355	237.605	2413.93	2381.32	2225.89	0	0	0	1	1	1
36.83_1742.8022n	No	1	#3735	2	36.833	1742.8	7.6797	GQCVSQPQQQSQQQL	[3] Carbamidomethyl C	A2IBV7	Glutenin subunit OS=Triticum aestivum OX=4565 GN=LMW-m1 PE=4 SV=1	10.485	Condition 2	Condition 1	4.94e-06	10.9553	419.589	336.707	386.867	3966.28	3801.61	4218.22	420.618	340.65	370.873	3966.28	3710.76	4043.15	0	0	0	1	1	1
37.23_849.3933n	No	1	#8404	2	37.2273	849.393	5.217	FPQQPSF		A2IBV7	Glutenin subunit OS=Triticum aestivum OX=4565 GN=LMW-m1 PE=4 SV=1	1.17374	Condition 2	Condition 1	0.442196	25.6907	344.586	357.231	362.695	298.551	507.346	443.559	345.431	361.415	347.7	298.551	495.222	425.15	0	1	1	0	0	0
42.17_704.3688n	No	1	#5619	1	42.1666	704.369	5.0954	ARSQML		A2IBV7	Glutenin subunit OS=Triticum aestivum OX=4565 GN=LMW-m1 PE=4 SV=1	1.24367	Condition 2	Condition 1	0.00390763	5.25972	538.652	505.579	507.467	619.305	681.971	628.527	539.973	511.501	486.487	619.305	665.674	602.441	0	0	0	1	1	0
61.85_2219.1300n	No	1	#11898	3	61.8518	2219.13	6.6495	SQQQPILPQQPPFSQQQQL		A2IBV7	Glutenin subunit OS=Triticum aestivum OX=4565 GN=LMW-m1 PE=4 SV=1	1.86521	Condition 2	Condition 1	0.001066	9.86328	846.617	849.916	743.195	1612.71	1593.42	1344.47	848.693	859.87	712.469	1612.71	1555.34	1288.67	1	1	1	1	1	0
46.86_907.4772n	No	2	#7473,#2666	1,2	46.8581	907.477	6.7251	RTTTSVPF		A2IBV7	Glutenin subunit OS=Triticum aestivum OX=4565 GN=LMW-m1 PE=4 SV=1	2.87302	Condition 2	Condition 1	1.14e-05	5.20525	1285.98	1361.45	1227.34	3623.85	3607.56	3900.87	1289.13	1377.39	1176.59	3623.85	3521.35	3738.97	1	0	2	2	2	0
51.98_1132.5769n	No	1	#1421	2	51.9766	1132.58	7.6263	QQLNPCKVF	[6] Carbamidomethyl C	A2IBV7	Glutenin subunit OS=Triticum aestivum OX=4565 GN=LMW-m1 PE=4 SV=1	10.3262	Condition 2	Condition 1	3.54e-07	5.23417	1533.53	1701.68	1639.93	17179.3	16122.3	17040	1537.29	1721.61	1572.13	17179.3	15737.1	16332.7	1	1	1	1	1	1
48.30_1046.5927n	No	1	#1587	2	48.3004	1046.59	7.525	LQPHQIAQL		A2IBV7	Glutenin subunit OS=Triticum aestivum OX=4565 GN=LMW-m1 PE=4 SV=1	4.13715	Condition 2	Condition 1	1.32e-05	8.55766	1833.09	1891.29	2001.53	8675.71	7538.52	7474.68	1837.58	1913.44	1918.78	8675.71	7358.37	7164.46	1	1	1	1	1	1
63.27_1506.7846n	No	1	#4386	2	63.2674	1506.78	7.1074	SQQQPILPQQPPF		A2IBV7	Glutenin subunit OS=Triticum aestivum OX=4565 GN=LMW-m1 PE=4 SV=1	1.28214	Condition 1	Condition 2	3.89e-06	1.05474	2732.64	2698.03	2676.11	2119.43	2109.87	2093.55	2739.34	2729.63	2565.47	2119.43	2059.45	2006.66	1	1	1	1	1	1
56.12_1086.5364n	No	1	#2114	2	56.1157	1086.54	6.7688	YRTTTSVPF	[8] Hydroxyproline	A2IBV7	Glutenin subunit OS=Triticum aestivum OX=4565 GN=LMW-m1 PE=4 SV=1	1.09696	Condition 1	Condition 2	0.0215106	4.25025	3654.63	3530.08	3357.23	3183.71	3192.8	3233.67	3663.6	3571.42	3218.43	3183.71	3116.5	3099.47	0	0	1	0	1	0
31.47_933.5079n	No	1	#1490	2	31.4657	933.508	6.2321	QPHQIAQL		A2IBV7	Glutenin subunit OS=Triticum aestivum OX=4565 GN=LMW-m1 PE=4 SV=1	1.1173	Condition 1	Condition 2	0.016643	4.18749	4152.71	4487.04	4447.46	3805.14	3927.09	3980.99	4162.89	4539.59	4263.59	3805.14	3833.25	3815.76	1	1	1	1	1	1
42.10_1874.9409n	No	2	#8840,#3445	2,3	42.098	1874.94	6.0283	QQQPLPPQQTFPQQPL	[14] Deamidation Q	A2IBV7	Glutenin subunit OS=Triticum aestivum OX=4565 GN=LMW-m1 PE=4 SV=1	1.30356	Condition 2	Condition 1	0.000457195	4.18768	5139.22	5411.78	4983.36	6837.7	6748.52	6663.71	5151.83	5475.16	4777.33	6837.7	6587.25	6387.14	0	0	2	2	0	0
57.51_924.5072n	No	2	#9808,#1845	1,2	57.5061	924.507	6.6076	VLPQQPPF		A2IBV7	Glutenin subunit OS=Triticum aestivum OX=4565 GN=LMW-m1 PE=4 SV=1	1.52346	Condition 1	Condition 2	0.000117489	3.78454	7392.9	7517.23	6988.84	4674.36	4743.86	4956.29	7411.02	7605.27	6699.9	4674.36	4630.49	4750.59	2	2	2	2	2	2
67.56_1447.8426n	No	1	#1011	2	67.5586	1447.84	7.8316	VQQQIPVVQPSIL		A2IBV7	Glutenin subunit OS=Triticum aestivum OX=4565 GN=LMW-m1 PE=4 SV=1	1.0219	Condition 2	Condition 1	0.471495	4.23413	9613.62	9645.8	9317.9	10184.5	9643.11	9375.48	9637.19	9758.77	8932.67	10184.5	9412.67	8986.36	1	1	1	1	1	1
43.84_830.3959n	No	2	#2756,#1611	1,2	43.8428	830.396	7.5811	SQQQPPF		A2IBV7	Glutenin subunit OS=Triticum aestivum OX=4565 GN=LMW-m1 PE=4 SV=1	1.25905	Condition 1	Condition 2	0.00123527	4.28668	9560.7	10317.9	10296.7	7785.57	8063.56	8117.66	9584.14	10438.7	9870.99	7785.57	7870.86	7780.75	2	2	0	2	2	2
58.54_1873.9670n	No	1	#4253	2	58.5367	1873.97	6.2025	QQQPLPPQQTFPQQPL		A2IBV7	Glutenin subunit OS=Triticum aestivum OX=4565 GN=LMW-m1 PE=4 SV=1	1.19639	Condition 1	Condition 2	0.0248533	8.79797	19124.6	16944.9	16169.9	14632.3	14680.1	14351.7	19171.5	17143.3	15501.3	14632.3	14329.3	13756.1	1	1	1	1	0	1
58.57_1289.6612n	No	1	#11611	2	58.5709	1289.66	6.0795	SIILQEQQQGF		A4KZ73	Low molecular weight glutenin subunit OS=Triticum aestivum OX=4565 PE=4 SV=1	182.503	Condition 2	Condition 1	0.00280998	101.185	4.35437	0	9.0203	816.756	841.585	782.583	4.36505	0	8.64737	816.756	821.474	750.103	0	0	0	1	1	1
65.45_1496.7491n	No	1	#11312	2	65.4476	1496.75	5.466	SQQQPILSQQPPF		A4KZ73	Low molecular weight glutenin subunit OS=Triticum aestivum OX=4565 PE=4 SV=1	2.91937	Condition 1	Condition 2	0.00613899	29.5245	733.013	835.399	629.267	299.818	287.283	165.69	734.81	845.183	603.251	299.818	280.418	158.813	0	0	0	1	1	0
58.11_1919.0733n	No	1	#6173	3	58.108	1919.07	5.4203	LQPHQIARLEVMTSIAL		A4KZ73	Low molecular weight glutenin subunit OS=Triticum aestivum OX=4565 PE=4 SV=1	3.91215	Condition 1	Condition 2	0.000298181	19.1486	1613.84	1429.16	1422.33	459.009	367.296	315.097	1617.8	1445.89	1363.53	459.009	358.519	302.02	1	1	1	1	0	0
51.98_1132.5769n	No	1	#1421	2	51.9766	1132.58	7.6263	QQLNPCKVF	[6] Carbamidomethyl C	A4KZ73	Low molecular weight glutenin subunit OS=Triticum aestivum OX=4565 PE=4 SV=1	10.3262	Condition 2	Condition 1	3.54e-07	5.23417	1533.53	1701.68	1639.93	17179.3	16122.3	17040	1537.29	1721.61	1572.13	17179.3	15737.1	16332.7	1	1	1	1	1	1
32.83_868.4412n	No	2	#6522,#3366	1,2	32.8309	868.441	7.9564	QQPQQQL		A4KZ73	Low molecular weight glutenin subunit OS=Triticum aestivum OX=4565 PE=4 SV=1	1.79772	Condition 2	Condition 1	6.17e-05	5.5674	3861.32	4301.95	4191.59	7383.29	7510.18	7317.1	3870.79	4352.34	4018.3	7383.29	7330.71	7013.42	2	0	0	2	0	0
43.84_830.3959n	No	2	#2756,#1611	1,2	43.8428	830.396	7.5811	SQQQPPF		A4KZ73	Low molecular weight glutenin subunit OS=Triticum aestivum OX=4565 PE=4 SV=1	1.25905	Condition 1	Condition 2	0.00123527	4.28668	9560.7	10317.9	10296.7	7785.57	8063.56	8117.66	9584.14	10438.7	9870.99	7785.57	7870.86	7780.75	2	2	0	2	2	2
40.12_2823.2727n	No	1	#14114	3	40.1219	2823.27	5.895	QQSGQGQQGHYPTSLQQPGQGQQGHY		A4URY8	Dy-type high molecular weight subunit protein OS=Triticum aestivum OX=4565 GN=1Dy12.3 PE=4 SV=1	72.9427	Condition 2	Condition 1	0.0123499	86.8251	14.9479	16.2396	0	946.998	763.365	564.537	14.9846	16.4297	0	946.998	745.123	541.107	0	0	0	1	0	1
41.64_1976.9163n	No	1	#21804	2	41.6352	1976.92	5.7199	TTAEGEASRQLQCEREL	[13] Carbamidomethyl C	A4URY8	Dy-type high molecular weight subunit protein OS=Triticum aestivum OX=4565 GN=1Dy12.3 PE=4 SV=1	1.39497	Condition 2	Condition 1	0.341994	84.1327	19.1971	50.7057	126.229	73.3668	99.1191	101.112	19.2442	51.2996	121.011	73.3668	96.7505	96.9158	1	0	0	0	0	1
47.84_1212.5446n	No	1	#19068	2	47.8375	1212.54	5.4571	WGTSSQTVQGY		A4URY8	Dy-type high molecular weight subunit protein OS=Triticum aestivum OX=4565 GN=1Dy12.3 PE=4 SV=1	5.58561	Condition 2	Condition 1	0.00569077	48.379	36.1476	51.4805	17.5944	198.716	229.994	159.022	36.2362	52.0834	16.867	198.716	224.497	152.422	0	0	0	1	0	1
28.79_1715.7575n	No	1	#17908	2	28.7938	1715.76	5.5971	QQPGQGQQQGQGQQGY		A4URY8	Dy-type high molecular weight subunit protein OS=Triticum aestivum OX=4565 GN=1Dy12.3 PE=4 SV=1	3.22157	Condition 2	Condition 1	0.00572694	26.5378	256.287	159.182	270.871	785.895	873.434	551.765	256.916	161.047	259.673	785.895	852.562	528.865	0	0	0	1	1	0
36.29_2069.9578n	No	2	#9474,#5545	2,3	36.291	2069.96	6.4086	YPGQASPQQPGQGQQPGKW	[10] Hydroxyproline|[16] Hydroxyproline	A4URY8	Dy-type high molecular weight subunit protein OS=Triticum aestivum OX=4565 GN=1Dy12.3 PE=4 SV=1	23.4626	Condition 2	Condition 1	1.32e-06	11.1213	148.317	175.643	184.468	3846.33	3988.33	4094.41	148.681	177.7	176.842	3846.33	3893.02	3924.48	0	0	0	2	2	2
43.85_2277.0424n	No	1	#15849	2	43.8514	2277.04	5.5685	QQPGQGQQQGQGQQGYYPTSL		A4URY8	Dy-type high molecular weight subunit protein OS=Triticum aestivum OX=4565 GN=1Dy12.3 PE=4 SV=1	1.65331	Condition 2	Condition 1	0.142282	34.6488	123.203	257.052	202.477	392.089	354.07	217.278	123.505	260.062	194.106	392.089	345.609	208.26	0	0	0	0	1	1
43.83_2277.0391n	No	1	#7062	3	43.8342	2277.04	5.5685	QQPGQGQQQGQGQQGYYPTSL		A4URY8	Dy-type high molecular weight subunit protein OS=Triticum aestivum OX=4565 GN=1Dy12.3 PE=4 SV=1	1.41358	Condition 2	Condition 1	0.00799784	10.3225	1063.19	879.034	911.965	1374.44	1419.1	1241.1	1065.8	889.33	874.262	1374.44	1385.19	1189.59	0	0	0	0	1	1
44.53_2246.0370n	No	2	#10446,#6706	2,3	44.5304	2246.04	6.3594	YPTSPQQPGQGQQLGQGQQGY		A4URY8	Dy-type high molecular weight subunit protein OS=Triticum aestivum OX=4565 GN=1Dy12.3 PE=4 SV=1	1.82358	Condition 2	Condition 1	0.0085514	21.8063	2527.75	1691.02	1862.29	3425.51	3926.7	3737.13	2533.95	1710.83	1785.3	3425.51	3832.86	3582.02	2	2	2	2	2	2
37.36_1700.7896n	No	1	#2946	2	37.3645	1700.79	7.4014	QQPGQGQQIGQGQQGY		A4URY8	Dy-type high molecular weight subunit protein OS=Triticum aestivum OX=4565 GN=1Dy12.3 PE=4 SV=1	3.51015	Condition 2	Condition 1	1.83e-05	9.16567	2434.33	2114.78	2060.65	7582.12	7782.01	7837.11	2440.3	2139.54	1975.46	7582.12	7596.04	7511.85	1	1	1	1	1	1
52.06_742.3548n	No	1	#1213	1	52.0624	742.355	7.2477	YYPTSL		A4URY8	Dy-type high molecular weight subunit protein OS=Triticum aestivum OX=4565 GN=1Dy12.3 PE=4 SV=1	3.20355	Condition 2	Condition 1	3.91e-06	5.18618	2482.78	2424.65	2675.1	8098.09	7887.96	8304.95	2488.87	2453.04	2564.51	8098.09	7699.46	7960.27	1	1	1	1	1	1
42.08_1344.6212n	No	1	#2871	2	42.0809	1344.62	5.1511	EACRQVVDQQL	[3] Carbamidomethyl C	A4URY8	Dy-type high molecular weight subunit protein OS=Triticum aestivum OX=4565 GN=1Dy12.3 PE=4 SV=1	1.57203	Condition 2	Condition 1	7.06e-05	3.33971	2896.98	3069.93	2914.24	4814.93	4504.79	4641.68	2904.09	3105.88	2793.75	4814.93	4397.14	4449.03	0	0	0	1	1	0
58.74_1785.8300n	No	1	#3120	2	58.7355	1785.83	5.4369	QQGIFWGTSSQTVQGY		A4URY8	Dy-type high molecular weight subunit protein OS=Triticum aestivum OX=4565 GN=1Dy12.3 PE=4 SV=1	2.08976	Condition 1	Condition 2	0.000606735	12.0787	3908.95	4134.88	4903.34	1958.92	2179.46	2057.16	3918.53	4183.31	4700.63	1958.92	2127.38	1971.78	1	0	1	0	0	0
41.64_1614.7405n	No	1	#1275	2	41.6352	1614.74	7.1692	QQSGQGQQGHYPTSL		A4URY8	Dy-type high molecular weight subunit protein OS=Triticum aestivum OX=4565 GN=1Dy12.3 PE=4 SV=1	2.91936	Condition 2	Condition 1	3.81e-06	5.03773	4670.51	5160.36	4992.34	14205.1	14541.6	14527.7	4681.96	5220.8	4785.94	14205.1	14194.1	13924.7	0	0	1	1	1	1
57.06_960.5051n	No	2	#2001,#2064	1,2	57.0604	960.505	6.802	QQLQQGIF		A4URY8	Dy-type high molecular weight subunit protein OS=Triticum aestivum OX=4565 GN=1Dy12.3 PE=4 SV=1	1.25694	Condition 2	Condition 1	0.000486694	3.37019	6292.21	6468.55	6727.46	8002.48	8201.48	8291.55	6307.64	6544.31	6449.33	8002.48	8005.49	7947.43	2	2	2	2	2	2
43.10_1439.6835n	No	1	#943	2	43.1035	1439.68	7.0685	QQPGQQGHYPTSL		A4URY8	Dy-type high molecular weight subunit protein OS=Triticum aestivum OX=4565 GN=1Dy12.3 PE=4 SV=1	2.32491	Condition 2	Condition 1	5.55e-08	1.09217	6507.24	6478.94	6595.76	15052.3	15363.9	15110.1	6523.2	6554.82	6323.07	15052.3	14996.8	14483	1	1	1	1	1	1
43.68_1527.7342n	No	1	#1597	2	43.6799	1527.73	7.3046	YPTSPQQPGQGQQL		A4URY8	Dy-type high molecular weight subunit protein OS=Triticum aestivum OX=4565 GN=1Dy12.3 PE=4 SV=1	1.61717	Condition 2	Condition 1	0.000271782	5.73174	6922.49	7426.94	7313.57	10913.6	12160.9	11958.2	6939.47	7513.92	7011.21	10913.6	11870.3	11461.9	1	1	1	1	1	1
49.00_876.4238n	No	1	#1260	1	48.9967	876.424	6.4612	YPGETTPL		A4URY8	Dy-type high molecular weight subunit protein OS=Triticum aestivum OX=4565 GN=1Dy12.3 PE=4 SV=1	1.20494	Condition 2	Condition 1	0.00337365	4.72986	7977.68	8530.83	8750.54	10028.7	10020.5	10386.3	7997.24	8630.74	8388.77	10028.7	9781.06	9955.27	1	1	1	1	1	1
44.40_2037.9674n	No	2	#2492,#2390	2,3	44.3999	2037.97	6.4972	YPGQASPQQPGQGQQPGKW		A4URY8	Dy-type high molecular weight subunit protein OS=Triticum aestivum OX=4565 GN=1Dy12.3 PE=4 SV=1	1.77993	Condition 1	Condition 2	0.0030193	14.9078	10371.9	10039.4	10186.9	4744.01	6207.85	6238.91	10397.4	10157	9765.78	4744.01	6059.5	5979.97	1	1	1	1	1	1
52.78_698.3930n	No	2	#2341,#785	1,2	52.7843	698.393	6.1382	AGRLPW		A4URY8	Dy-type high molecular weight subunit protein OS=Triticum aestivum OX=4565 GN=1Dy12.3 PE=4 SV=1	1.29843	Condition 1	Condition 2	0.0011163	4.98354	13504	14513.6	14880	10864.4	10917.6	11256	13537.1	14683.6	14264.8	10864.4	10656.7	10788.8	1	1	1	1	0	0
53.26_1476.7236n	No	1	#18460	2	53.2558	1476.72	6.0716	VYYPTSPQQPGQL		A5HMG1	HMW glutenin subunit 1Bx13 OS=Triticum aestivum OX=4565 PE=4 SV=1	1.42464	Condition 2	Condition 1	0.153515	32.5893	168.909	85.6517	128.73	196.581	150	199.47	169.324	86.6548	123.408	196.581	146.416	191.191	0	1	0	0	1	1
74.16_655.3704n	No	1	#5003	1	74.1603	655.37	6.0503	WGIPAL		A5HMG1	HMW glutenin subunit 1Bx13 OS=Triticum aestivum OX=4565 PE=4 SV=1	1.44035	Condition 2	Condition 1	0.00858545	12.3171	963.842	1030.43	806.496	1408.6	1308.56	1316.93	966.205	1042.5	773.153	1408.6	1277.29	1262.27	1	1	1	1	1	1
32.00_2544.1189n	No	1	#8284	3	31.9972	2544.12	6.3272	YPTSPQQPGQEQQSGQAQQSGQW		A5HMG1	HMW glutenin subunit 1Bx13 OS=Triticum aestivum OX=4565 PE=4 SV=1	1.0836	Condition 1	Condition 2	0.303926	10.9096	1405.16	1598.09	1750.07	1495.6	1434.28	1456.73	1408.61	1616.8	1677.71	1495.6	1400.01	1396.27	0	1	0	0	1	1
26.73_2188.9851n	No	2	#17799,#7039	2,3	26.7325	2188.99	5.0861	YPTSPQQPGQGQQSGQGQPGY		A5HMG1	HMW glutenin subunit 1Bx13 OS=Triticum aestivum OX=4565 PE=4 SV=1	1.50515	Condition 2	Condition 1	0.00185349	8.29493	1809.28	2047.3	2127.37	2842.45	3052.91	3111.36	1813.71	2071.28	2039.42	2842.45	2979.95	2982.23	0	0	2	0	2	0
51.72_2232.0176n	No	1	#8083	3	51.7195	2232.02	5.0172	YPISPQQSGQGQQPGQGQQGY		A5HMG1	HMW glutenin subunit 1Bx13 OS=Triticum aestivum OX=4565 PE=4 SV=1	1.71078	Condition 1	Condition 2	0.000592649	8.28361	2510.43	2960.1	2701.96	1643.77	1621.65	1511.64	2516.58	2994.77	2590.25	1643.77	1582.9	1448.9	0	1	0	0	0	1
35.69_2544.1171n	No	1	#4117	3	35.691	2544.12	5.7372	YPTSPQQPGQEQQSGQAQQSGQW		A5HMG1	HMW glutenin subunit 1Bx13 OS=Triticum aestivum OX=4565 PE=4 SV=1	1.92855	Condition 1	Condition 2	0.000134115	6.67792	4781.87	4216.92	4698.12	2348.2	2284.35	2469.64	4793.6	4266.3	4503.88	2348.2	2229.76	2367.14	1	0	1	1	0	0
46.12_1214.5957n	No	1	#1958	2	46.1187	1214.6	7.0014	YPTSPQQPGQL		A5HMG1	HMW glutenin subunit 1Bx13 OS=Triticum aestivum OX=4565 PE=4 SV=1	1.55501	Condition 2	Condition 1	3.59e-05	2.70879	4423.89	4670.17	4556.06	6879.14	7093.69	7253.24	4434.74	4724.87	4367.7	6879.14	6924.18	6952.21	1	1	1	1	1	1
38.74_1076.5140n	No	1	#1130	2	38.7398	1076.51	5.0444	QRPGQGQSGY		A5HMG1	HMW glutenin subunit 1Bx13 OS=Triticum aestivum OX=4565 PE=4 SV=1	1.59453	Condition 2	Condition 1	4.73e-05	4.09705	7221.87	7267.64	7400.5	11144.7	11662.8	12096.8	7239.58	7352.76	7094.54	11144.7	11384.1	11594.7	0	1	0	1	0	0
43.68_1527.7342n	No	1	#1597	2	43.6799	1527.73	7.3046	YPTSPQQPGQGQQL		A5HMG1	HMW glutenin subunit 1Bx13 OS=Triticum aestivum OX=4565 PE=4 SV=1	1.61717	Condition 2	Condition 1	0.000271782	5.73174	6922.49	7426.94	7313.57	10913.6	12160.9	11958.2	6939.47	7513.92	7011.21	10913.6	11870.3	11461.9	1	1	1	1	1	1
47.84_1212.5446n	No	1	#19068	2	47.8375	1212.54	5.4571	WGTSSQTVQGY		A5HMG2	HMW glutenin subunit 1By16 OS=Triticum aestivum OX=4565 PE=4 SV=1	5.58561	Condition 2	Condition 1	0.00569077	48.379	36.1476	51.4805	17.5944	198.716	229.994	159.022	36.2362	52.0834	16.867	198.716	224.497	152.422	0	0	0	1	0	1
53.24_1297.5931n	No	1	#15443	2	53.2386	1297.59	5.8131	GQGQQGYYPTSL		A5HMG2	HMW glutenin subunit 1By16 OS=Triticum aestivum OX=4565 PE=4 SV=1	4.83143	Condition 2	Condition 1	0.000341859	22.4555	83.7521	79.9801	68.6632	470.621	316.081	336.099	83.9575	80.9168	65.8244	470.621	308.527	322.15	0	0	0	1	0	1
36.29_2069.9578n	No	2	#9474,#5545	2,3	36.291	2069.96	6.4086	YPGQASPQQPGQGQQPGKW	[10] Hydroxyproline|[16] Hydroxyproline	A5HMG2	HMW glutenin subunit 1By16 OS=Triticum aestivum OX=4565 PE=4 SV=1	23.4626	Condition 2	Condition 1	1.32e-06	11.1213	148.317	175.643	184.468	3846.33	3988.33	4094.41	148.681	177.7	176.842	3846.33	3893.02	3924.48	0	0	0	2	2	2
38.77_2960.3572n	No	1	#9707	3	38.7741	2960.36	5.0178	YPTSPQQLGQGQQPGQWQQSGQGQQGY		A5HMG2	HMW glutenin subunit 1By16 OS=Triticum aestivum OX=4565 PE=4 SV=1	5.49567	Condition 2	Condition 1	9.93e-07	5.78263	268.411	241.107	245.98	1406.41	1386.66	1358.9	269.069	243.931	235.811	1406.41	1353.52	1302.5	0	1	1	0	0	0
30.55_1088.4766n	No	1	#13337	2	30.5465	1088.48	5.0489	HQSGQGQQGY		A5HMG2	HMW glutenin subunit 1By16 OS=Triticum aestivum OX=4565 PE=4 SV=1	1.62157	Condition 1	Condition 2	0.0806894	33.1364	430.635	356.111	444.591	322.327	277.179	159.841	431.691	360.281	426.21	322.327	270.555	153.207	1	0	0	0	0	1
28.34_1994.9528n	No	2	#9851,#5540	2,3	28.3396	1994.95	5.6379	EQGQQPGQGQQTRQGQQL		A5HMG2	HMW glutenin subunit 1By16 OS=Triticum aestivum OX=4565 PE=4 SV=1	10.9428	Condition 2	Condition 1	6.31e-05	25.0562	398.964	364.563	572.764	4884.36	4832.51	4905.91	399.942	368.833	549.085	4884.36	4717.03	4702.3	0	0	2	0	2	0
57.65_2151.9619n	No	1	#13948	3	57.6519	2151.96	5.3931	QQSGQGQQSGQGQQSGQGHQL		A5HMG2	HMW glutenin subunit 1By16 OS=Triticum aestivum OX=4565 PE=4 SV=1	5.78598	Condition 1	Condition 2	0.000122455	20.2084	864.265	609.805	629.096	113.693	119.718	130.083	866.384	616.947	603.087	113.693	116.857	124.684	0	1	1	0	0	0
46.51_1635.7287n	No	1	#4363	2	46.513	1635.73	6.6463	HQSGQGQQGYYPSSL		A5HMG2	HMW glutenin subunit 1By16 OS=Triticum aestivum OX=4565 PE=4 SV=1	4.59419	Condition 2	Condition 1	0.000252677	21.9473	875.738	677.856	569.43	3283.89	3287.54	3182.16	877.886	685.795	545.889	3283.89	3208.98	3050.09	1	1	1	1	1	1
39.05_2845.2636n	No	1	#6839	3	39.0483	2845.26	6.3977	YPTSPQQSGQGQQPGQSQQPGQGQQGY		A5HMG2	HMW glutenin subunit 1By16 OS=Triticum aestivum OX=4565 PE=4 SV=1	2.39443	Condition 2	Condition 1	8.18e-06	4.95228	1363.22	1371.45	1402.09	3138.38	3465.4	3301.41	1366.57	1387.52	1344.12	3138.38	3382.59	3164.39	1	1	1	1	1	1
47.96_1966.9521n	No	1	#1952	2	47.9575	1966.95	6.6194	TASLQQPGQGQQGHYPASL		A5HMG2	HMW glutenin subunit 1By16 OS=Triticum aestivum OX=4565 PE=4 SV=1	5.29317	Condition 2	Condition 1	4.04e-07	3.36154	1521.82	1585.33	1483.49	8089	7843.68	8366.35	1525.55	1603.9	1422.16	8089	7656.24	8019.12	1	1	1	1	1	1
37.36_1700.7896n	No	1	#2946	2	37.3645	1700.79	7.4014	QQPGQGQQIGQGQQGY		A5HMG2	HMW glutenin subunit 1By16 OS=Triticum aestivum OX=4565 PE=4 SV=1	3.51015	Condition 2	Condition 1	1.83e-05	9.16567	2434.33	2114.78	2060.65	7582.12	7782.01	7837.11	2440.3	2139.54	1975.46	7582.12	7596.04	7511.85	1	1	1	1	1	1
42.08_1344.6212n	No	1	#2871	2	42.0809	1344.62	5.1511	EACRQVVDQQL	[3] Carbamidomethyl C	A5HMG2	HMW glutenin subunit 1By16 OS=Triticum aestivum OX=4565 PE=4 SV=1	1.57203	Condition 2	Condition 1	7.06e-05	3.33971	2896.98	3069.93	2914.24	4814.93	4504.79	4641.68	2904.09	3105.88	2793.75	4814.93	4397.14	4449.03	0	0	0	1	1	0
47.48_1282.6650n	No	1	#1467	2	47.4838	1282.67	7.0702	QQVGQGQQIGQL		A5HMG2	HMW glutenin subunit 1By16 OS=Triticum aestivum OX=4565 PE=4 SV=1	1.76295	Condition 2	Condition 1	0.000848247	10.232	4153.78	3683.62	3394.79	6292.44	6692.37	6817.02	4163.97	3726.76	3254.44	6292.44	6532.45	6534.09	1	1	1	1	1	1
46.26_4034.7812n	No	1	#3158	4	46.2559	4034.78	5.2808	QQSGQGQQSGQGQQSGQGHQLGQGQQSGQEQQGYDNPY	[N-term] Pyroglutamic acid|[11] Deamidation Q	A5HMG2	HMW glutenin subunit 1By16 OS=Triticum aestivum OX=4565 PE=4 SV=1	2.97961	Condition 1	Condition 2	3.24e-05	8.16567	4261.9	4464.98	4110.49	1554.59	1433.72	1320.09	4272.35	4517.27	3940.55	1554.59	1399.46	1265.3	1	1	0	0	0	0
41.64_1614.7405n	No	1	#1275	2	41.6352	1614.74	6.0651	QQPGQGQQGHYTASL	[3] Hydroxyproline	A5HMG2	HMW glutenin subunit 1By16 OS=Triticum aestivum OX=4565 PE=4 SV=1	2.91936	Condition 2	Condition 1	3.81e-06	5.03773	4670.51	5160.36	4992.34	14205.1	14541.6	14527.7	4681.96	5220.8	4785.94	14205.1	14194.1	13924.7	0	0	1	1	1	1
38.78_2960.3573n	No	2	#1720,#3045	4,5	38.7826	2960.36	5.0178	YPTSPQQLGQGQQPGQWQQSGQGQQGY		A5HMG2	HMW glutenin subunit 1By16 OS=Triticum aestivum OX=4565 PE=4 SV=1	3.0131	Condition 2	Condition 1	5.5e-07	2.82916	5525.76	5358.39	5517.94	15984.5	16524.1	16912.5	5539.31	5421.15	5289.81	15984.5	16129.2	16210.6	0	1	1	0	0	0
49.00_876.4238n	No	1	#1260	1	48.9967	876.424	6.4612	YPGETTPL		A5HMG2	HMW glutenin subunit 1By16 OS=Triticum aestivum OX=4565 PE=4 SV=1	1.20494	Condition 2	Condition 1	0.00337365	4.72986	7977.68	8530.83	8750.54	10028.7	10020.5	10386.3	7997.24	8630.74	8388.77	10028.7	9781.06	9955.27	1	1	1	1	1	1
44.40_2037.9674n	No	2	#2492,#2390	2,3	44.3999	2037.97	6.4972	YPGQASPQQPGQGQQPGKW		A5HMG2	HMW glutenin subunit 1By16 OS=Triticum aestivum OX=4565 PE=4 SV=1	1.77993	Condition 1	Condition 2	0.0030193	14.9078	10371.9	10039.4	10186.9	4744.01	6207.85	6238.91	10397.4	10157	9765.78	4744.01	6059.5	5979.97	1	1	1	1	1	1
52.78_698.3930n	No	2	#2341,#785	1,2	52.7843	698.393	6.1382	AGRLPW		A5HMG2	HMW glutenin subunit 1By16 OS=Triticum aestivum OX=4565 PE=4 SV=1	1.29843	Condition 1	Condition 2	0.0011163	4.98354	13504	14513.6	14880	10864.4	10917.6	11256	13537.1	14683.6	14264.8	10864.4	10656.7	10788.8	1	1	1	1	0	0
46.27_4034.7650n	No	1	#1258	5	46.273	4034.77	5.2808	QQSGQGQQSGQGQQSGQGHQLGQGQQSGQEQQGYDNPY	[N-term] Pyroglutamic acid|[11] Deamidation Q	A5HMG2	HMW glutenin subunit 1By16 OS=Triticum aestivum OX=4565 PE=4 SV=1	2.59404	Condition 1	Condition 2	1.84e-05	6.50431	20075.1	19995.6	19127.4	8176.5	7283.45	7360.83	20124.3	20229.8	18336.6	8176.5	7109.4	7055.33	1	1	0	0	0	0
47.97_1419.6116n	No	1	#266	2	47.9747	1419.61	6.3347	EQGQQPGQGQQGY	[6] Hydroxyproline	A5HMG2	HMW glutenin subunit 1By16 OS=Triticum aestivum OX=4565 PE=4 SV=1	1.85589	Condition 1	Condition 2	1.53e-06	1.96079	45891.7	45229.7	47015.6	24497.4	24747.6	25186.6	46004.2	45759.4	45071.8	24497.4	24156.2	24141.2	0	0	1	0	0	1
71.66_1177.5853n	No	1	#13558	2	71.6614	1177.59	5.5306	IPPYCTIAPF	[5] Carbamidomethyl C	A5JSA5	Alpha-gliadin OS=Triticum aestivum OX=4565 GN=Gli-G2 PE=2 SV=1	146.434	Condition 2	Condition 1	3.54e-05	46.6927	12.9111	6.06197	6.19343	1295	1138.93	1251.32	12.9428	6.13297	5.93738	1295	1111.71	1199.39	0	0	0	1	1	1
41.88_1625.7829n	No	1	#11240	2	41.8751	1625.78	6.1554	RPQQPYPQPQPQY		A5JSA5	Alpha-gliadin OS=Triticum aestivum OX=4565 GN=Gli-G2 PE=2 SV=1	4.60434	Condition 2	Condition 1	1.42e-05	8.63223	280.741	309.864	283.545	1424.28	1209.26	1391.34	281.429	313.494	271.822	1424.28	1180.36	1333.6	0	0	0	1	1	1
42.81_702.3344n	No	1	#7797	1	42.812	702.334	6.48	SQPQPF		A5JSA5	Alpha-gliadin OS=Triticum aestivum OX=4565 GN=Gli-G2 PE=2 SV=1	2.24481	Condition 2	Condition 1	2.27e-05	5.55007	598.188	644.326	667.623	1470.85	1395.55	1421.5	599.655	651.872	640.022	1470.85	1362.2	1362.5	0	1	0	0	1	1
74.47_1567.8395n	No	1	#3285	2	74.4689	1567.84	6.9199	LQLQPFPQPQLPY		A5JSA5	Alpha-gliadin OS=Triticum aestivum OX=4565 GN=Gli-G2 PE=2 SV=1	1.98735	Condition 2	Condition 1	0.000923729	12.2261	3033.09	3137.12	2481.11	5893.27	5892.47	5407.51	3040.53	3173.86	2378.54	5893.27	5751.65	5183.08	0	1	0	1	1	1
57.95_707.3328n	No	1	#1365	1	57.9537	707.333	6.9794	CTIAPF	[1] Carbamidomethyl C	A5JSA5	Alpha-gliadin OS=Triticum aestivum OX=4565 GN=Gli-G2 PE=2 SV=1	1.21577	Condition 2	Condition 1	0.000371476	3.01184	4162.29	4331.83	4416.9	5220.55	5253.08	5223.19	4172.5	4382.57	4234.3	5220.55	5127.55	5006.41	0	1	0	1	1	1
60.12_1467.7874n	No	1	#11144	2	60.1172	1467.79	6.0372	QQQLIPCRDVVL	[7] Carbamidomethyl C	A5JSA6	Alpha-gliadin OS=Triticum aestivum OX=4565 GN=Gli-G3 PE=2 SV=1	17.6425	Condition 2	Condition 1	6.92e-05	30.1389	48.1694	40.7583	71.6601	939.026	994.79	899.353	48.2875	41.2356	68.6975	939.026	971.018	862.027	0	0	0	1	1	1
71.74_976.5063n	No	2	#4395,#12248	1,2	71.7386	976.506	5.9591	CTIAPVGIF	[1] Carbamidomethyl C	A5JSA6	Alpha-gliadin OS=Triticum aestivum OX=4565 GN=Gli-G3 PE=2 SV=1	1.28448	Condition 2	Condition 1	0.0335026	9.79034	1681.23	1656.21	1422.16	1820.8	2079.55	2213.24	1685.35	1675.61	1363.36	1820.8	2029.86	2121.38	2	2	2	1	2	2
69.26_1365.6631n	No	1	#13033	2	69.2584	1365.66	5.4557	IPPYCSTTIAPF	[5] Carbamidomethyl C	A5JSA7	Alpha-gliadin OS=Triticum aestivum OX=4565 GN=Gli-G4 PE=2 SV=1	335.331	Condition 2	Condition 1	3.11e-07	15.1967	6.30765	5.30792	7.21491	2089.1	2125.63	2099.72	6.32312	5.37009	6.91663	2089.1	2074.83	2012.57	0	0	0	1	0	1
60.12_1467.7874n	No	1	#11144	2	60.1172	1467.79	6.0372	QQQLIPCRDVVL	[7] Carbamidomethyl C	A5JSA7	Alpha-gliadin OS=Triticum aestivum OX=4565 GN=Gli-G4 PE=2 SV=1	17.6425	Condition 2	Condition 1	6.92e-05	30.1389	48.1694	40.7583	71.6601	939.026	994.79	899.353	48.2875	41.2356	68.6975	939.026	971.018	862.027	0	0	0	1	1	1
41.88_1625.7829n	No	1	#11240	2	41.8751	1625.78	6.1554	RPQQPYPQPQPQY		A5JSA7	Alpha-gliadin OS=Triticum aestivum OX=4565 GN=Gli-G4 PE=2 SV=1	4.60434	Condition 2	Condition 1	1.42e-05	8.63223	280.741	309.864	283.545	1424.28	1209.26	1391.34	281.429	313.494	271.822	1424.28	1180.36	1333.6	0	0	0	1	1	1
45.27_1491.6764n	No	1	#10404	2	45.2675	1491.68	6.0808	QQPQQQYPSGQGF		A5JSA7	Alpha-gliadin OS=Triticum aestivum OX=4565 GN=Gli-G4 PE=2 SV=1	4.08805	Condition 2	Condition 1	1.43e-05	9.2693	404.761	430.457	412.473	1881.25	1625.61	1593.75	405.754	435.499	395.42	1881.25	1586.77	1527.61	0	1	1	1	1	1
58.06_895.4119n	No	1	#637	1	58.0566	895.412	6.7929	CSTTIAPF	[1] Carbamidomethyl C	A5JSA7	Alpha-gliadin OS=Triticum aestivum OX=4565 GN=Gli-G4 PE=2 SV=1	1.09747	Condition 2	Condition 1	0.0254126	3.92026	8686.74	8068.07	8198.72	8978.54	9008.63	9398.54	8708.04	8162.56	7859.76	8978.54	8793.35	9008.47	1	1	1	1	1	1
71.66_1177.5853n	No	1	#13558	2	71.6614	1177.59	5.5306	IPPYCTIAPF	[5] Carbamidomethyl C	A5JSA8	Alpha-gliadin OS=Triticum aestivum OX=4565 GN=Gli-G5 PE=2 SV=1	146.434	Condition 2	Condition 1	3.54e-05	46.6927	12.9111	6.06197	6.19343	1295	1138.93	1251.32	12.9428	6.13297	5.93738	1295	1111.71	1199.39	0	0	0	1	1	1
60.12_1467.7874n	No	1	#11144	2	60.1172	1467.79	6.0372	QQQLIPCRDVVL	[7] Carbamidomethyl C	A5JSA8	Alpha-gliadin OS=Triticum aestivum OX=4565 GN=Gli-G5 PE=2 SV=1	17.6425	Condition 2	Condition 1	6.92e-05	30.1389	48.1694	40.7583	71.6601	939.026	994.79	899.353	48.2875	41.2356	68.6975	939.026	971.018	862.027	0	0	0	1	1	1
45.27_1491.6764n	No	1	#10404	2	45.2675	1491.68	6.0808	QQPQQQYPSGQGF		A5JSA8	Alpha-gliadin OS=Triticum aestivum OX=4565 GN=Gli-G5 PE=2 SV=1	4.08805	Condition 2	Condition 1	1.43e-05	9.2693	404.761	430.457	412.473	1881.25	1625.61	1593.75	405.754	435.499	395.42	1881.25	1586.77	1527.61	0	1	1	1	1	1
56.58_1680.9024n	No	1	#6404	2	56.5786	1680.9	5.1403	QPQQLPQFEAIRNL		A5JSA8	Alpha-gliadin OS=Triticum aestivum OX=4565 GN=Gli-G5 PE=2 SV=1	1.76338	Condition 1	Condition 2	0.01071	18.7926	1504.8	1573.87	1090.91	837.492	802.908	724.137	1508.49	1592.3	1045.81	837.492	783.721	694.083	0	0	1	1	1	0
57.95_707.3328n	No	1	#1365	1	57.9537	707.333	6.9794	CTIAPF	[1] Carbamidomethyl C	A5JSA8	Alpha-gliadin OS=Triticum aestivum OX=4565 GN=Gli-G5 PE=2 SV=1	1.21577	Condition 2	Condition 1	0.000371476	3.01184	4162.29	4331.83	4416.9	5220.55	5253.08	5223.19	4172.5	4382.57	4234.3	5220.55	5127.55	5006.41	0	1	0	1	1	1
71.66_1177.5853n	No	1	#13558	2	71.6614	1177.59	5.5306	IPPYCTIAPF	[5] Carbamidomethyl C	A5JSB0	Alpha-gliadin OS=Triticum aestivum OX=4565 GN=Gli-G7 PE=2 SV=1	146.434	Condition 2	Condition 1	3.54e-05	46.6927	12.9111	6.06197	6.19343	1295	1138.93	1251.32	12.9428	6.13297	5.93738	1295	1111.71	1199.39	0	0	0	1	1	1
41.88_1625.7829n	No	1	#11240	2	41.8751	1625.78	6.1554	RPQQPYPQPQPQY		A5JSB0	Alpha-gliadin OS=Triticum aestivum OX=4565 GN=Gli-G7 PE=2 SV=1	4.60434	Condition 2	Condition 1	1.42e-05	8.63223	280.741	309.864	283.545	1424.28	1209.26	1391.34	281.429	313.494	271.822	1424.28	1180.36	1333.6	0	0	0	1	1	1
42.81_702.3344n	No	1	#7797	1	42.812	702.334	6.48	SQPQPF		A5JSB0	Alpha-gliadin OS=Triticum aestivum OX=4565 GN=Gli-G7 PE=2 SV=1	2.24481	Condition 2	Condition 1	2.27e-05	5.55007	598.188	644.326	667.623	1470.85	1395.55	1421.5	599.655	651.872	640.022	1470.85	1362.2	1362.5	0	1	0	0	1	1
57.95_707.3328n	No	1	#1365	1	57.9537	707.333	6.9794	CTIAPF	[1] Carbamidomethyl C	A5JSB0	Alpha-gliadin OS=Triticum aestivum OX=4565 GN=Gli-G7 PE=2 SV=1	1.21577	Condition 2	Condition 1	0.000371476	3.01184	4162.29	4331.83	4416.9	5220.55	5253.08	5223.19	4172.5	4382.57	4234.3	5220.55	5127.55	5006.41	0	1	0	1	1	1
57.95_707.3328n	No	1	#1365	1	57.9537	707.333	6.9794	CTIAPF	[1] Carbamidomethyl C	A5JSB2	Alpha-gliadin OS=Triticum aestivum OX=4565 GN=Gli-Z2 PE=2 SV=1	1.21577	Condition 2	Condition 1	0.000371476	3.01184	4162.29	4331.83	4416.9	5220.55	5253.08	5223.19	4172.5	4382.57	4234.3	5220.55	5127.55	5006.41	0	1	0	1	1	1
71.66_1177.5853n	No	1	#13558	2	71.6614	1177.59	5.5306	IPPYCTIAPF	[5] Carbamidomethyl C	A5JSB3	Alpha-gliadin OS=Triticum aestivum OX=4565 GN=Gli-Z3 PE=2 SV=1	146.434	Condition 2	Condition 1	3.54e-05	46.6927	12.9111	6.06197	6.19343	1295	1138.93	1251.32	12.9428	6.13297	5.93738	1295	1111.71	1199.39	0	0	0	1	1	1
41.88_1625.7829n	No	1	#11240	2	41.8751	1625.78	6.1554	RPQQPYPQPQPQY		A5JSB3	Alpha-gliadin OS=Triticum aestivum OX=4565 GN=Gli-Z3 PE=2 SV=1	4.60434	Condition 2	Condition 1	1.42e-05	8.63223	280.741	309.864	283.545	1424.28	1209.26	1391.34	281.429	313.494	271.822	1424.28	1180.36	1333.6	0	0	0	1	1	1
42.81_702.3344n	No	1	#7797	1	42.812	702.334	6.48	SQPQPF		A5JSB3	Alpha-gliadin OS=Triticum aestivum OX=4565 GN=Gli-Z3 PE=2 SV=1	2.24481	Condition 2	Condition 1	2.27e-05	5.55007	598.188	644.326	667.623	1470.85	1395.55	1421.5	599.655	651.872	640.022	1470.85	1362.2	1362.5	0	1	0	0	1	1
74.47_1567.8395n	No	1	#3285	2	74.4689	1567.84	6.9199	LQLQPFPQPQLPY		A5JSB3	Alpha-gliadin OS=Triticum aestivum OX=4565 GN=Gli-Z3 PE=2 SV=1	1.98735	Condition 2	Condition 1	0.000923729	12.2261	3033.09	3137.12	2481.11	5893.27	5892.47	5407.51	3040.53	3173.86	2378.54	5893.27	5751.65	5183.08	0	1	0	1	1	1
57.95_707.3328n	No	1	#1365	1	57.9537	707.333	6.9794	CTIAPF	[1] Carbamidomethyl C	A5JSB3	Alpha-gliadin OS=Triticum aestivum OX=4565 GN=Gli-Z3 PE=2 SV=1	1.21577	Condition 2	Condition 1	0.000371476	3.01184	4162.29	4331.83	4416.9	5220.55	5253.08	5223.19	4172.5	4382.57	4234.3	5220.55	5127.55	5006.41	0	1	0	1	1	1
71.66_1177.5853n	No	1	#13558	2	71.6614	1177.59	5.5306	IPPYCTIAPF	[5] Carbamidomethyl C	A5JSB4	Alpha-gliadin OS=Triticum aestivum OX=4565 GN=Gli-Z4 PE=2 SV=1	146.434	Condition 2	Condition 1	3.54e-05	46.6927	12.9111	6.06197	6.19343	1295	1138.93	1251.32	12.9428	6.13297	5.93738	1295	1111.71	1199.39	0	0	0	1	1	1
60.12_1467.7874n	No	1	#11144	2	60.1172	1467.79	6.0372	QQQLIPCRDVVL	[7] Carbamidomethyl C	A5JSB4	Alpha-gliadin OS=Triticum aestivum OX=4565 GN=Gli-Z4 PE=2 SV=1	17.6425	Condition 2	Condition 1	6.92e-05	30.1389	48.1694	40.7583	71.6601	939.026	994.79	899.353	48.2875	41.2356	68.6975	939.026	971.018	862.027	0	0	0	1	1	1
45.27_1491.6764n	No	1	#10404	2	45.2675	1491.68	6.0808	QQPQQQYPSGQGF		A5JSB4	Alpha-gliadin OS=Triticum aestivum OX=4565 GN=Gli-Z4 PE=2 SV=1	4.08805	Condition 2	Condition 1	1.43e-05	9.2693	404.761	430.457	412.473	1881.25	1625.61	1593.75	405.754	435.499	395.42	1881.25	1586.77	1527.61	0	1	1	1	1	1
56.58_1680.9024n	No	1	#6404	2	56.5786	1680.9	5.1403	QPQQLPQFEAIRNL		A5JSB4	Alpha-gliadin OS=Triticum aestivum OX=4565 GN=Gli-Z4 PE=2 SV=1	1.76338	Condition 1	Condition 2	0.01071	18.7926	1504.8	1573.87	1090.91	837.492	802.908	724.137	1508.49	1592.3	1045.81	837.492	783.721	694.083	0	0	1	1	1	0
57.95_707.3328n	No	1	#1365	1	57.9537	707.333	6.9794	CTIAPF	[1] Carbamidomethyl C	A5JSB4	Alpha-gliadin OS=Triticum aestivum OX=4565 GN=Gli-Z4 PE=2 SV=1	1.21577	Condition 2	Condition 1	0.000371476	3.01184	4162.29	4331.83	4416.9	5220.55	5253.08	5223.19	4172.5	4382.57	4234.3	5220.55	5127.55	5006.41	0	1	0	1	1	1
60.12_1467.7874n	No	1	#11144	2	60.1172	1467.79	6.0372	QQQLIPCRDVVL	[7] Carbamidomethyl C	A5JSB5	Alpha-gliadin OS=Triticum aestivum OX=4565 GN=Gli-Z5 PE=2 SV=1	17.6425	Condition 2	Condition 1	6.92e-05	30.1389	48.1694	40.7583	71.6601	939.026	994.79	899.353	48.2875	41.2356	68.6975	939.026	971.018	862.027	0	0	0	1	1	1
41.88_1625.7829n	No	1	#11240	2	41.8751	1625.78	6.1554	RPQQPYPQPQPQY		A5JSB5	Alpha-gliadin OS=Triticum aestivum OX=4565 GN=Gli-Z5 PE=2 SV=1	4.60434	Condition 2	Condition 1	1.42e-05	8.63223	280.741	309.864	283.545	1424.28	1209.26	1391.34	281.429	313.494	271.822	1424.28	1180.36	1333.6	0	0	0	1	1	1
71.74_976.5063n	No	2	#4395,#12248	1,2	71.7386	976.506	5.9591	CTIAPVGIF	[1] Carbamidomethyl C	A5JSB5	Alpha-gliadin OS=Triticum aestivum OX=4565 GN=Gli-Z5 PE=2 SV=1	1.28448	Condition 2	Condition 1	0.0335026	9.79034	1681.23	1656.21	1422.16	1820.8	2079.55	2213.24	1685.35	1675.61	1363.36	1820.8	2029.86	2121.38	2	2	2	1	2	2
45.81_728.4097n	No	1	#123	1	45.8101	728.41	6.3887	QLVQQL	[4] Deamidation Q	A5JSB5	Alpha-gliadin OS=Triticum aestivum OX=4565 GN=Gli-Z5 PE=2 SV=1	1.90985	Condition 2	Condition 1	1.67e-05	4.21846	13113.5	13414.5	13621	24961	24913.2	26804.2	13145.6	13571.6	13057.9	24961	24317.9	25691.7	1	0	0	0	0	1
71.66_1177.5853n	No	1	#13558	2	71.6614	1177.59	5.5306	IPPYCTIAPF	[5] Carbamidomethyl C	A5JSB6	Alpha-gliadin OS=Triticum aestivum OX=4565 GN=Gli-Z6 PE=2 SV=1	146.434	Condition 2	Condition 1	3.54e-05	46.6927	12.9111	6.06197	6.19343	1295	1138.93	1251.32	12.9428	6.13297	5.93738	1295	1111.71	1199.39	0	0	0	1	1	1
41.88_1625.7829n	No	1	#11240	2	41.8751	1625.78	6.1554	RPQQPYPQPQPQY		A5JSB6	Alpha-gliadin OS=Triticum aestivum OX=4565 GN=Gli-Z6 PE=2 SV=1	4.60434	Condition 2	Condition 1	1.42e-05	8.63223	280.741	309.864	283.545	1424.28	1209.26	1391.34	281.429	313.494	271.822	1424.28	1180.36	1333.6	0	0	0	1	1	1
57.95_707.3328n	No	1	#1365	1	57.9537	707.333	6.9794	CTIAPF	[1] Carbamidomethyl C	A5JSB6	Alpha-gliadin OS=Triticum aestivum OX=4565 GN=Gli-Z6 PE=2 SV=1	1.21577	Condition 2	Condition 1	0.000371476	3.01184	4162.29	4331.83	4416.9	5220.55	5253.08	5223.19	4172.5	4382.57	4234.3	5220.55	5127.55	5006.41	0	1	0	1	1	1
60.12_1467.7874n	No	1	#11144	2	60.1172	1467.79	6.0372	QQQLIPCRDVVL	[7] Carbamidomethyl C	A5JSB7	Alpha-gliadin OS=Triticum aestivum OX=4565 GN=Gli-Z7 PE=2 SV=1	17.6425	Condition 2	Condition 1	6.92e-05	30.1389	48.1694	40.7583	71.6601	939.026	994.79	899.353	48.2875	41.2356	68.6975	939.026	971.018	862.027	0	0	0	1	1	1
40.14_1106.5064n	No	1	#6723	2	40.1391	1106.51	5.3887	QPFPSQQPY	[2] Hydroxyproline	A5JSB7	Alpha-gliadin OS=Triticum aestivum OX=4565 GN=Gli-Z7 PE=2 SV=1	1.17619	Condition 2	Condition 1	0.0763159	10.7603	1124.11	1201.24	1090.29	1503.24	1280.92	1233.26	1126.87	1215.31	1045.21	1503.24	1250.31	1182.08	0	0	0	1	1	0
71.74_976.5063n	No	2	#4395,#12248	1,2	71.7386	976.506	5.9591	CTIAPVGIF	[1] Carbamidomethyl C	A5JSB7	Alpha-gliadin OS=Triticum aestivum OX=4565 GN=Gli-Z7 PE=2 SV=1	1.28448	Condition 2	Condition 1	0.0335026	9.79034	1681.23	1656.21	1422.16	1820.8	2079.55	2213.24	1685.35	1675.61	1363.36	1820.8	2029.86	2121.38	2	2	2	1	2	2
45.81_728.4097n	No	1	#123	1	45.8101	728.41	6.3887	QLVQQL	[4] Deamidation Q	A5JSB7	Alpha-gliadin OS=Triticum aestivum OX=4565 GN=Gli-Z7 PE=2 SV=1	1.90985	Condition 2	Condition 1	1.67e-05	4.21846	13113.5	13414.5	13621	24961	24913.2	26804.2	13145.6	13571.6	13057.9	24961	24317.9	25691.7	1	0	0	0	0	1
60.12_1467.7874n	No	1	#11144	2	60.1172	1467.79	6.0372	QQQLIPCRDVVL	[7] Carbamidomethyl C	A7LHB0	Alpha gliadin OS=Triticum aestivum OX=4565 GN=gli-w7-75 PE=4 SV=1	17.6425	Condition 2	Condition 1	6.92e-05	30.1389	48.1694	40.7583	71.6601	939.026	994.79	899.353	48.2875	41.2356	68.6975	939.026	971.018	862.027	0	0	0	1	1	1
40.14_1106.5064n	No	1	#6723	2	40.1391	1106.51	5.3887	QPFPSQQPY	[2] Hydroxyproline	A7LHB0	Alpha gliadin OS=Triticum aestivum OX=4565 GN=gli-w7-75 PE=4 SV=1	1.17619	Condition 2	Condition 1	0.0763159	10.7603	1124.11	1201.24	1090.29	1503.24	1280.92	1233.26	1126.87	1215.31	1045.21	1503.24	1250.31	1182.08	0	0	0	1	1	0
71.74_976.5063n	No	2	#4395,#12248	1,2	71.7386	976.506	5.9591	CTIAPVGIF	[1] Carbamidomethyl C	A7LHB0	Alpha gliadin OS=Triticum aestivum OX=4565 GN=gli-w7-75 PE=4 SV=1	1.28448	Condition 2	Condition 1	0.0335026	9.79034	1681.23	1656.21	1422.16	1820.8	2079.55	2213.24	1685.35	1675.61	1363.36	1820.8	2029.86	2121.38	2	2	2	1	2	2
45.81_728.4097n	No	1	#123	1	45.8101	728.41	6.3887	QLVQQL	[4] Deamidation Q	A7LHB0	Alpha gliadin OS=Triticum aestivum OX=4565 GN=gli-w7-75 PE=4 SV=1	1.90985	Condition 2	Condition 1	1.67e-05	4.21846	13113.5	13414.5	13621	24961	24913.2	26804.2	13145.6	13571.6	13057.9	24961	24317.9	25691.7	1	0	0	0	0	1
41.88_1625.7829n	No	1	#11240	2	41.8751	1625.78	6.1554	RPQQPYPQPQPQY		A7LHB1	Alpha gliadin OS=Triticum aestivum OX=4565 GN=gli-w7-104 PE=4 SV=1	4.60434	Condition 2	Condition 1	1.42e-05	8.63223	280.741	309.864	283.545	1424.28	1209.26	1391.34	281.429	313.494	271.822	1424.28	1180.36	1333.6	0	0	0	1	1	1
42.81_702.3344n	No	1	#7797	1	42.812	702.334	6.48	SQPQPF		A7LHB1	Alpha gliadin OS=Triticum aestivum OX=4565 GN=gli-w7-104 PE=4 SV=1	2.24481	Condition 2	Condition 1	2.27e-05	5.55007	598.188	644.326	667.623	1470.85	1395.55	1421.5	599.655	651.872	640.022	1470.85	1362.2	1362.5	0	1	0	0	1	1
71.74_976.5063n	No	2	#4395,#12248	1,2	71.7386	976.506	5.9591	CTIAPVGIF	[1] Carbamidomethyl C	A7LHB1	Alpha gliadin OS=Triticum aestivum OX=4565 GN=gli-w7-104 PE=4 SV=1	1.28448	Condition 2	Condition 1	0.0335026	9.79034	1681.23	1656.21	1422.16	1820.8	2079.55	2213.24	1685.35	1675.61	1363.36	1820.8	2029.86	2121.38	2	2	2	1	2	2
74.47_1567.8395n	No	1	#3285	2	74.4689	1567.84	6.9199	LQLQPFPQPQLPY		A7LHB1	Alpha gliadin OS=Triticum aestivum OX=4565 GN=gli-w7-104 PE=4 SV=1	1.98735	Condition 2	Condition 1	0.000923729	12.2261	3033.09	3137.12	2481.11	5893.27	5892.47	5407.51	3040.53	3173.86	2378.54	5893.27	5751.65	5183.08	0	1	0	1	1	1
41.88_1625.7829n	No	1	#11240	2	41.8751	1625.78	6.1554	RPQQPYPQPQPQY		A7LHB4	Alpha gliadin OS=Triticum aestivum OX=4565 GN=gli-wE09 PE=4 SV=1	4.60434	Condition 2	Condition 1	1.42e-05	8.63223	280.741	309.864	283.545	1424.28	1209.26	1391.34	281.429	313.494	271.822	1424.28	1180.36	1333.6	0	0	0	1	1	1
42.81_702.3344n	No	1	#7797	1	42.812	702.334	6.48	SQPQPF		A7LHB4	Alpha gliadin OS=Triticum aestivum OX=4565 GN=gli-wE09 PE=4 SV=1	2.24481	Condition 2	Condition 1	2.27e-05	5.55007	598.188	644.326	667.623	1470.85	1395.55	1421.5	599.655	651.872	640.022	1470.85	1362.2	1362.5	0	1	0	0	1	1
74.47_1567.8395n	No	1	#3285	2	74.4689	1567.84	6.9199	LQLQPFPQPQLPY		A7LHB4	Alpha gliadin OS=Triticum aestivum OX=4565 GN=gli-wE09 PE=4 SV=1	1.98735	Condition 2	Condition 1	0.000923729	12.2261	3033.09	3137.12	2481.11	5893.27	5892.47	5407.51	3040.53	3173.86	2378.54	5893.27	5751.65	5183.08	0	1	0	1	1	1
41.88_1625.7829n	No	1	#11240	2	41.8751	1625.78	6.1554	RPQQPYPQPQPQY		A7LHB5	Alpha gliadin OS=Triticum aestivum OX=4565 GN=gli-wE12 PE=4 SV=1	4.60434	Condition 2	Condition 1	1.42e-05	8.63223	280.741	309.864	283.545	1424.28	1209.26	1391.34	281.429	313.494	271.822	1424.28	1180.36	1333.6	0	0	0	1	1	1
42.81_702.3344n	No	1	#7797	1	42.812	702.334	6.48	SQPQPF		A7LHB5	Alpha gliadin OS=Triticum aestivum OX=4565 GN=gli-wE12 PE=4 SV=1	2.24481	Condition 2	Condition 1	2.27e-05	5.55007	598.188	644.326	667.623	1470.85	1395.55	1421.5	599.655	651.872	640.022	1470.85	1362.2	1362.5	0	1	0	0	1	1
74.47_1567.8395n	No	1	#3285	2	74.4689	1567.84	6.9199	LQLQPFPQPQLPY		A7LHB5	Alpha gliadin OS=Triticum aestivum OX=4565 GN=gli-wE12 PE=4 SV=1	1.98735	Condition 2	Condition 1	0.000923729	12.2261	3033.09	3137.12	2481.11	5893.27	5892.47	5407.51	3040.53	3173.86	2378.54	5893.27	5751.65	5183.08	0	1	0	1	1	1
60.12_1467.7874n	No	1	#11144	2	60.1172	1467.79	6.0372	QQQLIPCRDVVL	[7] Carbamidomethyl C	A7LHB7	Alpha gliadin OS=Triticum aestivum OX=4565 GN=gli-wF08 PE=4 SV=1	17.6425	Condition 2	Condition 1	6.92e-05	30.1389	48.1694	40.7583	71.6601	939.026	994.79	899.353	48.2875	41.2356	68.6975	939.026	971.018	862.027	0	0	0	1	1	1
40.14_1106.5064n	No	1	#6723	2	40.1391	1106.51	5.3887	QPFPSQQPY	[2] Hydroxyproline	A7LHB7	Alpha gliadin OS=Triticum aestivum OX=4565 GN=gli-wF08 PE=4 SV=1	1.17619	Condition 2	Condition 1	0.0763159	10.7603	1124.11	1201.24	1090.29	1503.24	1280.92	1233.26	1126.87	1215.31	1045.21	1503.24	1250.31	1182.08	0	0	0	1	1	0
71.74_976.5063n	No	2	#4395,#12248	1,2	71.7386	976.506	5.9591	CTIAPVGIF	[1] Carbamidomethyl C	A7LHB7	Alpha gliadin OS=Triticum aestivum OX=4565 GN=gli-wF08 PE=4 SV=1	1.28448	Condition 2	Condition 1	0.0335026	9.79034	1681.23	1656.21	1422.16	1820.8	2079.55	2213.24	1685.35	1675.61	1363.36	1820.8	2029.86	2121.38	2	2	2	1	2	2
45.81_728.4097n	No	1	#123	1	45.8101	728.41	6.3887	QLVQQL	[4] Deamidation Q	A7LHB7	Alpha gliadin OS=Triticum aestivum OX=4565 GN=gli-wF08 PE=4 SV=1	1.90985	Condition 2	Condition 1	1.67e-05	4.21846	13113.5	13414.5	13621	24961	24913.2	26804.2	13145.6	13571.6	13057.9	24961	24317.9	25691.7	1	0	0	0	0	1
37.77_1422.6412n	No	1	#7785	2	37.7691	1422.64	5.945	LQQQMNPCKNY	[8] Carbamidomethyl C	A7XDG6	Gamma gliadin 2 OS=Triticum aestivum OX=4565 GN=qp904 PE=4 SV=1	272.806	Condition 2	Condition 1	0.00346656	92.4033	12.3397	0	7.97551	1784.48	1965.1	1792.53	12.37	0	7.64578	1784.48	1918.14	1718.13	0	0	0	0	1	1
50.65_1057.5278n	No	1	#11704	2	50.6459	1057.53	5.7706	LQQCNPVSL	[4] Carbamidomethyl C	A7XDG6	Gamma gliadin 2 OS=Triticum aestivum OX=4565 GN=qp904 PE=4 SV=1	21.1821	Condition 2	Condition 1	0.00320349	94.0649	17.262	10.9778	63.818	661.889	603.652	684.439	17.3044	11.1064	61.1796	661.889	589.227	656.033	0	0	0	1	0	1
56.97_1170.6055n	No	1	#27080	1	56.9661	1170.61	7.2501	LLQQCNPVSL	[5] Carbamidomethyl C	A7XDG6	Gamma gliadin 2 OS=Triticum aestivum OX=4565 GN=qp904 PE=4 SV=1	2.18063	Condition 2	Condition 1	0.00722047	19.556	38.6866	53.6281	44.9038	109.502	112.439	77.2819	38.7815	54.2562	43.0474	109.502	109.752	74.0744	1	1	1	1	1	1
50.12_1266.5883n	No	1	#12275	2	50.1215	1266.59	5.4204	RTLPNMCNVY	[7] Carbamidomethyl C	A7XDG6	Gamma gliadin 2 OS=Triticum aestivum OX=4565 GN=qp904 PE=4 SV=1	18.5371	Condition 2	Condition 1	2.36e-06	9.82008	62.5138	56.0885	51.4291	965.592	1134.92	1051.38	62.6671	56.7454	49.3029	965.592	1107.8	1007.74	0	0	0	1	1	1
55.16_1894.9632n	No	1	#14002	2	55.1623	1894.96	6.7002	QLVQGQGIIQPQQPAQY		A7XDG6	Gamma gliadin 2 OS=Triticum aestivum OX=4565 GN=qp904 PE=4 SV=1	6.41703	Condition 2	Condition 1	1.88e-05	12.2386	216.454	174.587	178.12	1168.94	1312.75	1170.63	216.985	176.632	170.756	1168.94	1281.38	1122.05	0	0	0	1	1	1
34.61_1330.6577n	No	2	#4052,#4222	2,3	34.6093	1330.66	5.0579	QQCNPVSLVSSL	[3] Carbamidomethyl C	A7XDG6	Gamma gliadin 2 OS=Triticum aestivum OX=4565 GN=qp904 PE=4 SV=1	4.86191	Condition 2	Condition 1	2.65e-05	10.1946	840.14	883.323	722.696	3872.1	3737.54	4283.35	842.2	893.668	692.818	3872.1	3648.22	4105.58	0	2	2	0	0	2
33.46_1551.7252n	No	1	#11179	2	33.4588	1551.73	6.1717	LQQQMNPCKNYL	[5] Oxidation M|[8] Carbamidomethyl C	A7XDG6	Gamma gliadin 2 OS=Triticum aestivum OX=4565 GN=qp904 PE=4 SV=1	1.15062	Condition 2	Condition 1	0.0630378	9.28285	1045.39	1140.53	1258.13	1278.53	1336.4	1347.85	1047.95	1153.88	1206.11	1278.53	1304.46	1291.91	1	0	0	1	0	0
49.14_901.4876n	No	2	#1502,#15654	1,2	49.1425	901.488	6.7293	ASIVAGISGQ		A7XDG6	Gamma gliadin 2 OS=Triticum aestivum OX=4565 GN=qp904 PE=4 SV=1	2.31774	Condition 2	Condition 1	6.6e-06	4.23135	2188.98	2376.74	2326.57	5362.04	5203.97	5408.52	2194.35	2404.57	2230.39	5362.04	5079.61	5184.05	1	1	1	2	2	2
57.02_1170.6097n	No	1	#2372	2	57.0176	1170.61	7.2501	LLQQCNPVSL	[5] Carbamidomethyl C	A7XDG6	Gamma gliadin 2 OS=Triticum aestivum OX=4565 GN=qp904 PE=4 SV=1	1.48323	Condition 2	Condition 1	0.000120794	4.58465	2677.25	2652.4	2649.29	3779.75	3916.7	4138.16	2683.82	2683.46	2539.76	3779.75	3823.11	3966.42	1	1	1	1	1	1
52.69_1375.6599n	No	1	#812	2	52.69	1375.66	7.2719	VRPDCSTINAPF	[5] Carbamidomethyl C	A7XDG6	Gamma gliadin 2 OS=Triticum aestivum OX=4565 GN=qp904 PE=4 SV=1	1.50083	Condition 2	Condition 1	0.00304611	10.5249	7211.22	8528.09	8833.5	11980.9	12403	12495.7	7228.91	8627.97	8468.3	11980.9	12106.6	11977.1	1	1	1	1	1	1
41.91_1057.5268n	No	2	#5026,#845	1,2	41.9094	1057.53	5.2311	LQQCNPVSL	[4] Carbamidomethyl C	A7XDG6	Gamma gliadin 2 OS=Triticum aestivum OX=4565 GN=qp904 PE=4 SV=1	1.37706	Condition 1	Condition 2	4.32e-05	2.30546	13937	14097.7	14421.2	10055.8	10248.1	10527	13971.2	14262.8	13825	10055.8	10003.2	10090.1	2	2	0	0	0	0
37.25_899.4648n	No	2	#5114,#1472	1,2	37.253	899.465	6.5734	RQPQQPF		A7XDG6	Gamma gliadin 2 OS=Triticum aestivum OX=4565 GN=qp904 PE=4 SV=1	1.0115	Condition 2	Condition 1	0.832405	7.24884	14389.7	14135	14652.3	13479.2	14606.2	15588.1	14425	14300.6	14046.5	13479.2	14257.2	14941.1	2	2	2	2	2	2
33.98_1266.5690n	No	2	#158,#2818	2,3	33.9816	1266.57	5.0659	RTLPNMCNVY	[7] Carbamidomethyl C	A7XDG6	Gamma gliadin 2 OS=Triticum aestivum OX=4565 GN=qp904 PE=4 SV=1	1.52388	Condition 1	Condition 2	8.31e-05	3.49545	47004.2	47620.6	49558.6	32213.5	32136	30266.5	47119.5	48178.3	47509.7	32213.5	31368.1	29010.3	0	1	1	0	0	0
37.77_1422.6412n	No	1	#7785	2	37.7691	1422.64	5.945	LQQQMNPCKNY	[8] Carbamidomethyl C	A7XDG7	Gamma gliadin 3 OS=Triticum aestivum OX=4565 GN=qp905 PE=4 SV=1	272.806	Condition 2	Condition 1	0.00346656	92.4033	12.3397	0	7.97551	1784.48	1965.1	1792.53	12.37	0	7.64578	1784.48	1918.14	1718.13	0	0	0	0	1	1
50.65_1057.5278n	No	1	#11704	2	50.6459	1057.53	5.7706	LQQCNPVSL	[4] Carbamidomethyl C	A7XDG7	Gamma gliadin 3 OS=Triticum aestivum OX=4565 GN=qp905 PE=4 SV=1	21.1821	Condition 2	Condition 1	0.00320349	94.0649	17.262	10.9778	63.818	661.889	603.652	684.439	17.3044	11.1064	61.1796	661.889	589.227	656.033	0	0	0	1	0	1
56.97_1170.6055n	No	1	#27080	1	56.9661	1170.61	7.2501	LLQQCNPVSL	[5] Carbamidomethyl C	A7XDG7	Gamma gliadin 3 OS=Triticum aestivum OX=4565 GN=qp905 PE=4 SV=1	2.18063	Condition 2	Condition 1	0.00722047	19.556	38.6866	53.6281	44.9038	109.502	112.439	77.2819	38.7815	54.2562	43.0474	109.502	109.752	74.0744	1	1	1	1	1	1
50.12_1266.5883n	No	1	#12275	2	50.1215	1266.59	5.4204	RTLPNMCNVY	[7] Carbamidomethyl C	A7XDG7	Gamma gliadin 3 OS=Triticum aestivum OX=4565 GN=qp905 PE=4 SV=1	18.5371	Condition 2	Condition 1	2.36e-06	9.82008	62.5138	56.0885	51.4291	965.592	1134.92	1051.38	62.6671	56.7454	49.3029	965.592	1107.8	1007.74	0	0	0	1	1	1
34.61_1330.6577n	No	2	#4052,#4222	2,3	34.6093	1330.66	5.0579	QQCNPVSLVSSL	[3] Carbamidomethyl C	A7XDG7	Gamma gliadin 3 OS=Triticum aestivum OX=4565 GN=qp905 PE=4 SV=1	4.86191	Condition 2	Condition 1	2.65e-05	10.1946	840.14	883.323	722.696	3872.1	3737.54	4283.35	842.2	893.668	692.818	3872.1	3648.22	4105.58	0	2	2	0	0	2
33.46_1551.7252n	No	1	#11179	2	33.4588	1551.73	6.1717	LQQQMNPCKNYL	[5] Oxidation M|[8] Carbamidomethyl C	A7XDG7	Gamma gliadin 3 OS=Triticum aestivum OX=4565 GN=qp905 PE=4 SV=1	1.15062	Condition 2	Condition 1	0.0630378	9.28285	1045.39	1140.53	1258.13	1278.53	1336.4	1347.85	1047.95	1153.88	1206.11	1278.53	1304.46	1291.91	1	0	0	1	0	0
47.06_3357.7552n	No	1	#7337	3	47.0553	3357.76	5.0565	QCAAIHSVVHSIVMQQEQQQGIQILRPLF	[2] Carbamidomethyl C	A7XDG7	Gamma gliadin 3 OS=Triticum aestivum OX=4565 GN=qp905 PE=4 SV=1	2.2851	Condition 2	Condition 1	6.26e-06	3.41112	1888.4	1781.65	1868.12	4384.22	4145.23	4125.86	1893.03	1802.52	1790.89	4384.22	4046.17	3954.62	1	0	0	0	1	0
49.14_901.4876n	No	2	#1502,#15654	1,2	49.1425	901.488	6.7293	ASIVAGISGQ		A7XDG7	Gamma gliadin 3 OS=Triticum aestivum OX=4565 GN=qp905 PE=4 SV=1	2.31774	Condition 2	Condition 1	6.6e-06	4.23135	2188.98	2376.74	2326.57	5362.04	5203.97	5408.52	2194.35	2404.57	2230.39	5362.04	5079.61	5184.05	1	1	1	2	2	2
57.02_1170.6097n	No	1	#2372	2	57.0176	1170.61	7.2501	LLQQCNPVSL	[5] Carbamidomethyl C	A7XDG7	Gamma gliadin 3 OS=Triticum aestivum OX=4565 GN=qp905 PE=4 SV=1	1.48323	Condition 2	Condition 1	0.000120794	4.58465	2677.25	2652.4	2649.29	3779.75	3916.7	4138.16	2683.82	2683.46	2539.76	3779.75	3823.11	3966.42	1	1	1	1	1	1
52.69_1375.6599n	No	1	#812	2	52.69	1375.66	7.2719	VRPDCSTINAPF	[5] Carbamidomethyl C	A7XDG7	Gamma gliadin 3 OS=Triticum aestivum OX=4565 GN=qp905 PE=4 SV=1	1.50083	Condition 2	Condition 1	0.00304611	10.5249	7211.22	8528.09	8833.5	11980.9	12403	12495.7	7228.91	8627.97	8468.3	11980.9	12106.6	11977.1	1	1	1	1	1	1
41.91_1057.5268n	No	2	#5026,#845	1,2	41.9094	1057.53	5.2311	LQQCNPVSL	[4] Carbamidomethyl C	A7XDG7	Gamma gliadin 3 OS=Triticum aestivum OX=4565 GN=qp905 PE=4 SV=1	1.37706	Condition 1	Condition 2	4.32e-05	2.30546	13937	14097.7	14421.2	10055.8	10248.1	10527	13971.2	14262.8	13825	10055.8	10003.2	10090.1	2	2	0	0	0	0
37.25_899.4648n	No	2	#5114,#1472	1,2	37.253	899.465	6.5734	RQPQQPF		A7XDG7	Gamma gliadin 3 OS=Triticum aestivum OX=4565 GN=qp905 PE=4 SV=1	1.0115	Condition 2	Condition 1	0.832405	7.24884	14389.7	14135	14652.3	13479.2	14606.2	15588.1	14425	14300.6	14046.5	13479.2	14257.2	14941.1	2	2	2	2	2	2
33.98_1266.5690n	No	2	#158,#2818	2,3	33.9816	1266.57	5.0659	RTLPNMCNVY	[7] Carbamidomethyl C	A7XDG7	Gamma gliadin 3 OS=Triticum aestivum OX=4565 GN=qp905 PE=4 SV=1	1.52388	Condition 1	Condition 2	8.31e-05	3.49545	47004.2	47620.6	49558.6	32213.5	32136	30266.5	47119.5	48178.3	47509.7	32213.5	31368.1	29010.3	0	1	1	0	0	0
42.17_704.3688n	No	1	#5619	1	42.1666	704.369	5.0954	ARSQML		A8CA05	Low molecular weight glutenin OS=Triticum aestivum subsp. yunnanense OX=425487 PE=4 SV=1	1.24367	Condition 2	Condition 1	0.00390763	5.25972	538.652	505.579	507.467	619.305	681.971	628.527	539.973	511.501	486.487	619.305	665.674	602.441	0	0	0	1	1	0
40.34_1712.8102n	No	1	#9115	2	40.3448	1712.81	6.2686	SQQQQQFPQQQQPL	[5] Deamidation Q	A8CA05	Low molecular weight glutenin OS=Triticum aestivum subsp. yunnanense OX=425487 PE=4 SV=1	1.03566	Condition 2	Condition 1	0.71812	11.3455	848.824	737.694	926.831	767.809	952.058	883.121	850.905	746.334	888.513	767.809	929.307	846.468	1	1	1	0	0	0
27.89_996.4985n	No	1	#10628	2	27.8919	996.499	5.4694	QQPQQQQL		A8CA05	Low molecular weight glutenin OS=Triticum aestivum subsp. yunnanense OX=425487 PE=4 SV=1	1.16306	Condition 2	Condition 1	0.182399	14.0156	940.657	1017.78	1038.28	973.813	1252.21	1259.34	942.963	1029.7	995.357	973.813	1222.29	1207.08	0	0	0	1	0	1
72.53_1575.6979n	No	1	#6639	2	72.5285	1575.7	5.4433	GQCSFQQPQQQQL	[3] Carbamidomethyl C	A8CA05	Low molecular weight glutenin OS=Triticum aestivum subsp. yunnanense OX=425487 PE=4 SV=1	2.78564	Condition 2	Condition 1	0.000182159	9.61431	1251.02	1174.5	1032.61	3305.46	3434.86	2892.77	1254.09	1188.26	989.915	3305.46	3352.77	2772.71	1	1	0	0	0	0
54.58_822.4600n	No	2	#6995,#7862	1,2	54.5781	822.46	7.0262	QQQPLPL		A8CA05	Low molecular weight glutenin OS=Triticum aestivum subsp. yunnanense OX=425487 PE=4 SV=1	2.20319	Condition 1	Condition 2	0.000561751	10.4602	1774.39	1661.93	1440.23	674.593	738.963	799.849	1778.74	1681.39	1380.68	674.593	721.304	766.652	2	2	2	0	2	2
51.98_1132.5769n	No	1	#1421	2	51.9766	1132.58	7.6263	QQLNPCKVF	[6] Carbamidomethyl C	A8CA05	Low molecular weight glutenin OS=Triticum aestivum subsp. yunnanense OX=425487 PE=4 SV=1	10.3262	Condition 2	Condition 1	3.54e-07	5.23417	1533.53	1701.68	1639.93	17179.3	16122.3	17040	1537.29	1721.61	1572.13	17179.3	15737.1	16332.7	1	1	1	1	1	1
54.32_825.4402n	No	2	#11228,#5836	1,2	54.3209	825.44	6.6833	LPQQPPF		A8CA05	Low molecular weight glutenin OS=Triticum aestivum subsp. yunnanense OX=425487 PE=4 SV=1	2.47834	Condition 1	Condition 2	6.11e-05	6.42834	1665.82	1858.04	1842.7	756.851	739.356	669.178	1669.9	1879.8	1766.52	756.851	721.688	641.405	2	2	2	1	1	1
48.30_1046.5927n	No	1	#1587	2	48.3004	1046.59	7.525	LQPHQIAQL		A8CA05	Low molecular weight glutenin OS=Triticum aestivum subsp. yunnanense OX=425487 PE=4 SV=1	4.13715	Condition 2	Condition 1	1.32e-05	8.55766	1833.09	1891.29	2001.53	8675.71	7538.52	7474.68	1837.58	1913.44	1918.78	8675.71	7358.37	7164.46	1	1	1	1	1	1
60.29_1595.7570n	No	1	#4627	2	60.2886	1595.76	5.6698	GQWPQQQQVPQGTL	[2] Deamidation Q|[11] Deamidation Q	A8CA05	Low molecular weight glutenin OS=Triticum aestivum subsp. yunnanense OX=425487 PE=4 SV=1	1.3531	Condition 1	Condition 2	0.00168928	6.43022	3320.32	3147.21	3197.22	2226.61	2532.77	2383.29	3328.47	3184.07	3065.03	2226.61	2472.25	2284.38	0	1	1	0	0	0
31.47_933.5079n	No	1	#1490	2	31.4657	933.508	6.2321	QPHQIAQL		A8CA05	Low molecular weight glutenin OS=Triticum aestivum subsp. yunnanense OX=425487 PE=4 SV=1	1.1173	Condition 1	Condition 2	0.016643	4.18749	4152.71	4487.04	4447.46	3805.14	3927.09	3980.99	4162.89	4539.59	4263.59	3805.14	3833.25	3815.76	1	1	1	1	1	1
43.84_830.3959n	No	2	#2756,#1611	1,2	43.8428	830.396	7.5811	SQQQPPF		A8CA05	Low molecular weight glutenin OS=Triticum aestivum subsp. yunnanense OX=425487 PE=4 SV=1	1.25905	Condition 1	Condition 2	0.00123527	4.28668	9560.7	10317.9	10296.7	7785.57	8063.56	8117.66	9584.14	10438.7	9870.99	7785.57	7870.86	7780.75	2	2	0	2	2	2
43.79_958.4549n	No	2	#4611,#1021	1,2	43.7914	958.455	7.6329	SQQQQPPF		A8CA05	Low molecular weight glutenin OS=Triticum aestivum subsp. yunnanense OX=425487 PE=4 SV=1	1.19987	Condition 1	Condition 2	0.00159236	3.04223	13729	14271.7	14502.2	11465.5	11775.7	12181.8	13762.6	14438.9	13902.7	11465.5	11494.3	11676.2	1	2	2	2	2	2
46.26_1593.7920n	No	1	#1037	2	46.2559	1593.79	5.281	GQWPQQQQVPQGTL		A8CA05	Low molecular weight glutenin OS=Triticum aestivum subsp. yunnanense OX=425487 PE=4 SV=1	1.14091	Condition 1	Condition 2	0.00628391	3.73898	30617.6	28934.7	28554.1	26355.7	25668.4	25200.3	30692.6	29273.6	27373.6	26355.7	25055	24154.4	0	0	0	1	1	1
57.57_1770.8347n	No	2	#382,#20959	2,3	57.5747	1770.83	7.9101	SQQQQPPFSQQQPPF		A8CA05	Low molecular weight glutenin OS=Triticum aestivum subsp. yunnanense OX=425487 PE=4 SV=1	1.3931	Condition 1	Condition 2	0.000332537	4.30084	41774.2	39762.2	38354.4	28826.3	27885.7	29348.5	41876.7	40227.9	36768.7	28826.3	27219.3	28130.4	2	2	2	2	1	1
40.12_2823.2727n	No	1	#14114	3	40.1219	2823.27	5.895	QQSGQGQQGHYPTSLQQPGQGQQGHY		A9QUS3	High molecular weight glutenin subunit OS=Triticum aestivum OX=4565 GN=1Dy12* PE=2 SV=1	72.9427	Condition 2	Condition 1	0.0123499	86.8251	14.9479	16.2396	0	946.998	763.365	564.537	14.9846	16.4297	0	946.998	745.123	541.107	0	0	0	1	0	1
47.84_1212.5446n	No	1	#19068	2	47.8375	1212.54	5.4571	WGTSSQTVQGY		A9QUS3	High molecular weight glutenin subunit OS=Triticum aestivum OX=4565 GN=1Dy12* PE=2 SV=1	5.58561	Condition 2	Condition 1	0.00569077	48.379	36.1476	51.4805	17.5944	198.716	229.994	159.022	36.2362	52.0834	16.867	198.716	224.497	152.422	0	0	0	1	0	1
28.79_1715.7575n	No	1	#17908	2	28.7938	1715.76	5.5971	QQPGQGQQQGQGQQGY		A9QUS3	High molecular weight glutenin subunit OS=Triticum aestivum OX=4565 GN=1Dy12* PE=2 SV=1	3.22157	Condition 2	Condition 1	0.00572694	26.5378	256.287	159.182	270.871	785.895	873.434	551.765	256.916	161.047	259.673	785.895	852.562	528.865	0	0	0	1	1	0
36.29_2069.9578n	No	2	#9474,#5545	2,3	36.291	2069.96	6.4086	YPGQASPQQPGQGQQPGKW	[10] Hydroxyproline|[16] Hydroxyproline	A9QUS3	High molecular weight glutenin subunit OS=Triticum aestivum OX=4565 GN=1Dy12* PE=2 SV=1	23.4626	Condition 2	Condition 1	1.32e-06	11.1213	148.317	175.643	184.468	3846.33	3988.33	4094.41	148.681	177.7	176.842	3846.33	3893.02	3924.48	0	0	0	2	2	2
43.85_2277.0424n	No	1	#15849	2	43.8514	2277.04	5.5685	QQPGQGQQQGQGQQGYYPTSL		A9QUS3	High molecular weight glutenin subunit OS=Triticum aestivum OX=4565 GN=1Dy12* PE=2 SV=1	1.65331	Condition 2	Condition 1	0.142282	34.6488	123.203	257.052	202.477	392.089	354.07	217.278	123.505	260.062	194.106	392.089	345.609	208.26	0	0	0	0	1	1
56.27_2546.2128n	No	1	#6801	3	56.27	2546.21	6.5864	GQGQQIGQVQQPGQGQQGYYPTSL		A9QUS3	High molecular weight glutenin subunit OS=Triticum aestivum OX=4565 GN=1Dy12* PE=2 SV=1	9.76882	Condition 2	Condition 1	0.000179237	27.9122	178.876	319.562	261.336	2572.71	2495.07	2354.32	179.315	323.305	250.532	2572.71	2435.45	2256.6	0	1	1	1	1	1
43.83_2277.0391n	No	1	#7062	3	43.8342	2277.04	5.5685	QQPGQGQQQGQGQQGYYPTSL		A9QUS3	High molecular weight glutenin subunit OS=Triticum aestivum OX=4565 GN=1Dy12* PE=2 SV=1	1.41358	Condition 2	Condition 1	0.00799784	10.3225	1063.19	879.034	911.965	1374.44	1419.1	1241.1	1065.8	889.33	874.262	1374.44	1385.19	1189.59	0	0	0	0	1	1
44.53_2246.0370n	No	2	#10446,#6706	2,3	44.5304	2246.04	6.3594	YPTSPQQPGQGQQLGQGQQGY		A9QUS3	High molecular weight glutenin subunit OS=Triticum aestivum OX=4565 GN=1Dy12* PE=2 SV=1	1.82358	Condition 2	Condition 1	0.0085514	21.8063	2527.75	1691.02	1862.29	3425.51	3926.7	3737.13	2533.95	1710.83	1785.3	3425.51	3832.86	3582.02	2	2	2	2	2	2
37.36_1700.7896n	No	1	#2946	2	37.3645	1700.79	7.4014	QQPGQGQQIGQGQQGY		A9QUS3	High molecular weight glutenin subunit OS=Triticum aestivum OX=4565 GN=1Dy12* PE=2 SV=1	3.51015	Condition 2	Condition 1	1.83e-05	9.16567	2434.33	2114.78	2060.65	7582.12	7782.01	7837.11	2440.3	2139.54	1975.46	7582.12	7596.04	7511.85	1	1	1	1	1	1
52.06_742.3548n	No	1	#1213	1	52.0624	742.355	7.2477	YYPTSL		A9QUS3	High molecular weight glutenin subunit OS=Triticum aestivum OX=4565 GN=1Dy12* PE=2 SV=1	3.20355	Condition 2	Condition 1	3.91e-06	5.18618	2482.78	2424.65	2675.1	8098.09	7887.96	8304.95	2488.87	2453.04	2564.51	8098.09	7699.46	7960.27	1	1	1	1	1	1
41.82_1984.9352n	No	2	#4225,#11447	2,3	41.8152	1984.94	7.2353	GQGQQIGQVQQPGQGQQGY		A9QUS3	High molecular weight glutenin subunit OS=Triticum aestivum OX=4565 GN=1Dy12* PE=2 SV=1	1.41798	Condition 2	Condition 1	0.000411036	5.2325	2302.19	2521.1	2527.28	3538.34	3417.99	3466.66	2307.84	2550.62	2422.79	3538.34	3336.31	3322.78	2	2	1	2	2	2
42.08_1344.6212n	No	1	#2871	2	42.0809	1344.62	5.1511	EACRQVVDQQL	[3] Carbamidomethyl C	A9QUS3	High molecular weight glutenin subunit OS=Triticum aestivum OX=4565 GN=1Dy12* PE=2 SV=1	1.57203	Condition 2	Condition 1	7.06e-05	3.33971	2896.98	3069.93	2914.24	4814.93	4504.79	4641.68	2904.09	3105.88	2793.75	4814.93	4397.14	4449.03	0	0	0	1	1	0
58.74_1785.8300n	No	1	#3120	2	58.7355	1785.83	5.4369	QQGIFWGTSSQTVQGY		A9QUS3	High molecular weight glutenin subunit OS=Triticum aestivum OX=4565 GN=1Dy12* PE=2 SV=1	2.08976	Condition 1	Condition 2	0.000606735	12.0787	3908.95	4134.88	4903.34	1958.92	2179.46	2057.16	3918.53	4183.31	4700.63	1958.92	2127.38	1971.78	1	0	1	0	0	0
41.64_1614.7405n	No	1	#1275	2	41.6352	1614.74	7.1692	QQSGQGQQGHYPTSL		A9QUS3	High molecular weight glutenin subunit OS=Triticum aestivum OX=4565 GN=1Dy12* PE=2 SV=1	2.91936	Condition 2	Condition 1	3.81e-06	5.03773	4670.51	5160.36	4992.34	14205.1	14541.6	14527.7	4681.96	5220.8	4785.94	14205.1	14194.1	13924.7	0	0	1	1	1	1
57.06_960.5051n	No	2	#2001,#2064	1,2	57.0604	960.505	6.802	QQLQQGIF		A9QUS3	High molecular weight glutenin subunit OS=Triticum aestivum OX=4565 GN=1Dy12* PE=2 SV=1	1.25694	Condition 2	Condition 1	0.000486694	3.37019	6292.21	6468.55	6727.46	8002.48	8201.48	8291.55	6307.64	6544.31	6449.33	8002.48	8005.49	7947.43	2	2	2	2	2	2
43.10_1439.6835n	No	1	#943	2	43.1035	1439.68	7.0685	QQPGQQGHYPTSL		A9QUS3	High molecular weight glutenin subunit OS=Triticum aestivum OX=4565 GN=1Dy12* PE=2 SV=1	2.32491	Condition 2	Condition 1	5.55e-08	1.09217	6507.24	6478.94	6595.76	15052.3	15363.9	15110.1	6523.2	6554.82	6323.07	15052.3	14996.8	14483	1	1	1	1	1	1
43.68_1527.7342n	No	1	#1597	2	43.6799	1527.73	7.3046	YPTSPQQPGQGQQL		A9QUS3	High molecular weight glutenin subunit OS=Triticum aestivum OX=4565 GN=1Dy12* PE=2 SV=1	1.61717	Condition 2	Condition 1	0.000271782	5.73174	6922.49	7426.94	7313.57	10913.6	12160.9	11958.2	6939.47	7513.92	7011.21	10913.6	11870.3	11461.9	1	1	1	1	1	1
49.00_876.4238n	No	1	#1260	1	48.9967	876.424	6.4612	YPGETTPL		A9QUS3	High molecular weight glutenin subunit OS=Triticum aestivum OX=4565 GN=1Dy12* PE=2 SV=1	1.20494	Condition 2	Condition 1	0.00337365	4.72986	7977.68	8530.83	8750.54	10028.7	10020.5	10386.3	7997.24	8630.74	8388.77	10028.7	9781.06	9955.27	1	1	1	1	1	1
44.40_2037.9674n	No	2	#2492,#2390	2,3	44.3999	2037.97	6.4972	YPGQASPQQPGQGQQPGKW		A9QUS3	High molecular weight glutenin subunit OS=Triticum aestivum OX=4565 GN=1Dy12* PE=2 SV=1	1.77993	Condition 1	Condition 2	0.0030193	14.9078	10371.9	10039.4	10186.9	4744.01	6207.85	6238.91	10397.4	10157	9765.78	4744.01	6059.5	5979.97	1	1	1	1	1	1
52.78_698.3930n	No	2	#2341,#785	1,2	52.7843	698.393	6.1382	AGRLPW		A9QUS3	High molecular weight glutenin subunit OS=Triticum aestivum OX=4565 GN=1Dy12* PE=2 SV=1	1.29843	Condition 1	Condition 2	0.0011163	4.98354	13504	14513.6	14880	10864.4	10917.6	11256	13537.1	14683.6	14264.8	10864.4	10656.7	10788.8	1	1	1	1	0	0
58.57_1289.6612n	No	1	#11611	2	58.5709	1289.66	6.0795	SIILQEQQQGF		A9YSH4	Low molecular weight glutenin OS=Triticum aestivum subsp. yunnanense OX=425487 PE=4 SV=1	182.503	Condition 2	Condition 1	0.00280998	101.185	4.35437	0	9.0203	816.756	841.585	782.583	4.36505	0	8.64737	816.756	821.474	750.103	0	0	0	1	1	1
60.41_1620.8255n	No	1	#2953	2	60.4086	1620.83	7.2832	SQQQQPVLPQQPPF		A9YSH4	Low molecular weight glutenin OS=Triticum aestivum subsp. yunnanense OX=425487 PE=4 SV=1	1.77886	Condition 1	Condition 2	0.000468958	9.53059	4940.46	4887.83	4732.42	2596.23	3028.06	2561.13	4952.58	4945.08	4536.77	2596.23	2955.7	2454.84	1	1	1	1	1	1
43.79_958.4549n	No	2	#4611,#1021	1,2	43.7914	958.455	7.6329	SQQQQPPF		A9YSH4	Low molecular weight glutenin OS=Triticum aestivum subsp. yunnanense OX=425487 PE=4 SV=1	1.19987	Condition 1	Condition 2	0.00159236	3.04223	13729	14271.7	14502.2	11465.5	11775.7	12181.8	13762.6	14438.9	13902.7	11465.5	11494.3	11676.2	1	2	2	2	2	2
40.12_2823.2727n	No	1	#14114	3	40.1219	2823.27	5.895	QQSGQGQQGHYPTSLQQPGQGQQGHY		A9YSK3	High molecular weight glutenin subunit OS=Triticum aestivum OX=4565 GN=Glu-D1-2 PE=4 SV=1	72.9427	Condition 2	Condition 1	0.0123499	86.8251	14.9479	16.2396	0	946.998	763.365	564.537	14.9846	16.4297	0	946.998	745.123	541.107	0	0	0	1	0	1
41.64_1976.9163n	No	1	#21804	2	41.6352	1976.92	5.7199	TTAEGEASRQLQCEREL	[13] Carbamidomethyl C	A9YSK3	High molecular weight glutenin subunit OS=Triticum aestivum OX=4565 GN=Glu-D1-2 PE=4 SV=1	1.39497	Condition 2	Condition 1	0.341994	84.1327	19.1971	50.7057	126.229	73.3668	99.1191	101.112	19.2442	51.2996	121.011	73.3668	96.7505	96.9158	1	0	0	0	0	1
47.84_1212.5446n	No	1	#19068	2	47.8375	1212.54	5.4571	WGTSSQTVQGY		A9YSK3	High molecular weight glutenin subunit OS=Triticum aestivum OX=4565 GN=Glu-D1-2 PE=4 SV=1	5.58561	Condition 2	Condition 1	0.00569077	48.379	36.1476	51.4805	17.5944	198.716	229.994	159.022	36.2362	52.0834	16.867	198.716	224.497	152.422	0	0	0	1	0	1
28.79_1715.7575n	No	1	#17908	2	28.7938	1715.76	5.5971	QQPGQGQQQGQGQQGY		A9YSK3	High molecular weight glutenin subunit OS=Triticum aestivum OX=4565 GN=Glu-D1-2 PE=4 SV=1	3.22157	Condition 2	Condition 1	0.00572694	26.5378	256.287	159.182	270.871	785.895	873.434	551.765	256.916	161.047	259.673	785.895	852.562	528.865	0	0	0	1	1	0
36.29_2069.9578n	No	2	#9474,#5545	2,3	36.291	2069.96	6.4086	YPGQASPQQPGQGQQPGKW	[10] Hydroxyproline|[16] Hydroxyproline	A9YSK3	High molecular weight glutenin subunit OS=Triticum aestivum OX=4565 GN=Glu-D1-2 PE=4 SV=1	23.4626	Condition 2	Condition 1	1.32e-06	11.1213	148.317	175.643	184.468	3846.33	3988.33	4094.41	148.681	177.7	176.842	3846.33	3893.02	3924.48	0	0	0	2	2	2
43.85_2277.0424n	No	1	#15849	2	43.8514	2277.04	5.5685	QQPGQGQQQGQGQQGYYPTSL		A9YSK3	High molecular weight glutenin subunit OS=Triticum aestivum OX=4565 GN=Glu-D1-2 PE=4 SV=1	1.65331	Condition 2	Condition 1	0.142282	34.6488	123.203	257.052	202.477	392.089	354.07	217.278	123.505	260.062	194.106	392.089	345.609	208.26	0	0	0	0	1	1
57.19_1667.7992n	No	1	#9239	2	57.189	1667.8	6.0793	QQPGQGQQGYYPTSL	[N-term] Pyroglutamic acid	A9YSK3	High molecular weight glutenin subunit OS=Triticum aestivum OX=4565 GN=Glu-D1-2 PE=4 SV=1	4.97815	Condition 2	Condition 1	2.89e-05	11.9339	418.547	329.466	386.675	1786.39	1964.83	1897.42	419.574	333.324	370.688	1786.39	1917.87	1818.67	0	0	0	1	0	1
28.08_1083.5262n	No	1	#9068	2	28.0805	1083.53	5.6916	GQGQQPRQW		A9YSK3	High molecular weight glutenin subunit OS=Triticum aestivum OX=4565 GN=Glu-D1-2 PE=4 SV=1	1.13917	Condition 1	Condition 2	0.208436	13.521	444.02	494.969	579.516	416.983	462.891	453.123	445.109	500.766	555.557	416.983	451.83	434.317	0	0	1	0	1	1
25.61_1624.7460n	No	1	#9303	3	25.6077	1624.75	5.2803	QQPGQGQQGHYPTSL		A9YSK3	High molecular weight glutenin subunit OS=Triticum aestivum OX=4565 GN=Glu-D1-2 PE=4 SV=1	1.11999	Condition 2	Condition 1	0.35108	16.2532	598.926	659.146	667.723	605.571	712.311	838.994	600.394	666.866	640.118	605.571	695.289	804.173	0	1	0	1	1	1
47.67_1650.7812n	No	1	#10302	2	47.6661	1650.78	5.2989	YPTSLQQPGQGQQGY		A9YSK3	High molecular weight glutenin subunit OS=Triticum aestivum OX=4565 GN=Glu-D1-2 PE=4 SV=1	5.94406	Condition 2	Condition 1	5.99e-05	17.9596	471.29	661.466	519.279	3258.06	3335.74	3225.98	472.445	669.213	497.811	3258.06	3256.03	3092.09	1	0	1	0	0	0
34.67_1089.4851n	No	1	#6045	2	34.6693	1089.49	5.1235	QQPGQGQQGY		A9YSK3	High molecular weight glutenin subunit OS=Triticum aestivum OX=4565 GN=Glu-D1-2 PE=4 SV=1	3.67281	Condition 2	Condition 1	0.000173523	16.6831	621.103	867.408	730.594	2760.83	2667.43	2722.1	622.626	877.567	700.389	2760.83	2603.69	2609.12	1	0	0	1	1	1
43.83_2277.0391n	No	1	#7062	3	43.8342	2277.04	5.5685	QQPGQGQQQGQGQQGYYPTSL		A9YSK3	High molecular weight glutenin subunit OS=Triticum aestivum OX=4565 GN=Glu-D1-2 PE=4 SV=1	1.41358	Condition 2	Condition 1	0.00799784	10.3225	1063.19	879.034	911.965	1374.44	1419.1	1241.1	1065.8	889.33	874.262	1374.44	1385.19	1189.59	0	0	0	0	1	1
44.53_2246.0370n	No	2	#10446,#6706	2,3	44.5304	2246.04	6.3594	YPTSPQQPGQGQQLGQGQQGY		A9YSK3	High molecular weight glutenin subunit OS=Triticum aestivum OX=4565 GN=Glu-D1-2 PE=4 SV=1	1.82358	Condition 2	Condition 1	0.0085514	21.8063	2527.75	1691.02	1862.29	3425.51	3926.7	3737.13	2533.95	1710.83	1785.3	3425.51	3832.86	3582.02	2	2	2	2	2	2
52.06_742.3548n	No	1	#1213	1	52.0624	742.355	7.2477	YYPTSL		A9YSK3	High molecular weight glutenin subunit OS=Triticum aestivum OX=4565 GN=Glu-D1-2 PE=4 SV=1	3.20355	Condition 2	Condition 1	3.91e-06	5.18618	2482.78	2424.65	2675.1	8098.09	7887.96	8304.95	2488.87	2453.04	2564.51	8098.09	7699.46	7960.27	1	1	1	1	1	1
42.08_1344.6212n	No	1	#2871	2	42.0809	1344.62	5.1511	EACRQVVDQQL	[3] Carbamidomethyl C	A9YSK3	High molecular weight glutenin subunit OS=Triticum aestivum OX=4565 GN=Glu-D1-2 PE=4 SV=1	1.57203	Condition 2	Condition 1	7.06e-05	3.33971	2896.98	3069.93	2914.24	4814.93	4504.79	4641.68	2904.09	3105.88	2793.75	4814.93	4397.14	4449.03	0	0	0	1	1	0
58.74_1785.8300n	No	1	#3120	2	58.7355	1785.83	5.4369	QQGIFWGTSSQTVQGY		A9YSK3	High molecular weight glutenin subunit OS=Triticum aestivum OX=4565 GN=Glu-D1-2 PE=4 SV=1	2.08976	Condition 1	Condition 2	0.000606735	12.0787	3908.95	4134.88	4903.34	1958.92	2179.46	2057.16	3918.53	4183.31	4700.63	1958.92	2127.38	1971.78	1	0	1	0	0	0
41.64_1614.7405n	No	1	#1275	2	41.6352	1614.74	7.1692	QQSGQGQQGHYPTSL		A9YSK3	High molecular weight glutenin subunit OS=Triticum aestivum OX=4565 GN=Glu-D1-2 PE=4 SV=1	2.91936	Condition 2	Condition 1	3.81e-06	5.03773	4670.51	5160.36	4992.34	14205.1	14541.6	14527.7	4681.96	5220.8	4785.94	14205.1	14194.1	13924.7	0	0	1	1	1	1
57.06_960.5051n	No	2	#2001,#2064	1,2	57.0604	960.505	6.802	QQLQQGIF		A9YSK3	High molecular weight glutenin subunit OS=Triticum aestivum OX=4565 GN=Glu-D1-2 PE=4 SV=1	1.25694	Condition 2	Condition 1	0.000486694	3.37019	6292.21	6468.55	6727.46	8002.48	8201.48	8291.55	6307.64	6544.31	6449.33	8002.48	8005.49	7947.43	2	2	2	2	2	2
43.68_1527.7342n	No	1	#1597	2	43.6799	1527.73	7.3046	YPTSPQQPGQGQQL		A9YSK3	High molecular weight glutenin subunit OS=Triticum aestivum OX=4565 GN=Glu-D1-2 PE=4 SV=1	1.61717	Condition 2	Condition 1	0.000271782	5.73174	6922.49	7426.94	7313.57	10913.6	12160.9	11958.2	6939.47	7513.92	7011.21	10913.6	11870.3	11461.9	1	1	1	1	1	1
49.00_876.4238n	No	1	#1260	1	48.9967	876.424	6.4612	YPGETTPL		A9YSK3	High molecular weight glutenin subunit OS=Triticum aestivum OX=4565 GN=Glu-D1-2 PE=4 SV=1	1.20494	Condition 2	Condition 1	0.00337365	4.72986	7977.68	8530.83	8750.54	10028.7	10020.5	10386.3	7997.24	8630.74	8388.77	10028.7	9781.06	9955.27	1	1	1	1	1	1
44.40_2037.9674n	No	2	#2492,#2390	2,3	44.3999	2037.97	6.4972	YPGQASPQQPGQGQQPGKW		A9YSK3	High molecular weight glutenin subunit OS=Triticum aestivum OX=4565 GN=Glu-D1-2 PE=4 SV=1	1.77993	Condition 1	Condition 2	0.0030193	14.9078	10371.9	10039.4	10186.9	4744.01	6207.85	6238.91	10397.4	10157	9765.78	4744.01	6059.5	5979.97	1	1	1	1	1	1
52.78_698.3930n	No	2	#2341,#785	1,2	52.7843	698.393	6.1382	AGRLPW		A9YSK3	High molecular weight glutenin subunit OS=Triticum aestivum OX=4565 GN=Glu-D1-2 PE=4 SV=1	1.29843	Condition 1	Condition 2	0.0011163	4.98354	13504	14513.6	14880	10864.4	10917.6	11256	13537.1	14683.6	14264.8	10864.4	10656.7	10788.8	1	1	1	1	0	0
26.09_1678.7357n	No	1	#17312	2	26.0877	1678.74	5.4857	QQTGQGQQSGQGQQGY		A9YSK4	High molecular weight glutenin subunit OS=Triticum aestivum OX=4565 GN=Glu-D1-1 PE=4 SV=1	4.62734	Condition 2	Condition 1	0.00795569	48.0964	84.5381	37.1512	110.615	374.091	328.136	372.721	84.7454	37.5863	106.041	374.091	320.294	357.252	0	0	1	1	1	1
53.24_1297.5931n	No	1	#15443	2	53.2386	1297.59	5.8131	GQGQQGYYPTSL		A9YSK4	High molecular weight glutenin subunit OS=Triticum aestivum OX=4565 GN=Glu-D1-1 PE=4 SV=1	4.83143	Condition 2	Condition 1	0.000341859	22.4555	83.7521	79.9801	68.6632	470.621	316.081	336.099	83.9575	80.9168	65.8244	470.621	308.527	322.15	0	0	0	1	0	1
52.96_2930.2699n	No	1	#19781	3	52.9643	2930.27	5.1077	YPTSPQESGQGQQPGQWQQPGQGQPGY	[20] Hydroxyproline	A9YSK4	High molecular weight glutenin subunit OS=Triticum aestivum OX=4565 GN=Glu-D1-1 PE=4 SV=1	1.99162	Condition 2	Condition 1	0.0584676	38.3724	85.567	119.389	117.962	302.797	140.111	200.222	85.7768	120.788	113.085	302.797	136.763	191.912	1	0	0	1	0	0
57.19_1538.7376n	No	1	#5589	2	57.189	1538.74	6.5049	QLGQGQQGYYPTSL		A9YSK4	High molecular weight glutenin subunit OS=Triticum aestivum OX=4565 GN=Glu-D1-1 PE=4 SV=1	15.0322	Condition 2	Condition 1	6.65e-06	14.3683	158.346	134.679	179.972	2424.56	2444.06	2241.58	158.734	136.257	172.531	2424.56	2385.66	2148.55	1	1	1	1	1	1
39.39_1221.5480n	No	1	#10322	2	39.3912	1221.55	6.0329	QQPGQGQPGYY		A9YSK4	High molecular weight glutenin subunit OS=Triticum aestivum OX=4565 GN=Glu-D1-1 PE=4 SV=1	18.8027	Condition 2	Condition 1	0.00013775	35.9686	81.1871	162.757	105.43	2062.17	2381.75	2125.28	81.3862	164.663	101.071	2062.17	2324.83	2037.07	0	0	0	1	1	1
55.91_692.3731n	No	1	#7479	1	55.91	692.373	5.9646	YLTSPL		A9YSK4	High molecular weight glutenin subunit OS=Triticum aestivum OX=4565 GN=Glu-D1-1 PE=4 SV=1	1.53082	Condition 2	Condition 1	0.000167299	4.40811	408.777	429.951	405.247	621.268	616.097	666.94	409.779	434.987	388.493	621.268	601.374	639.26	0	0	0	1	1	1
55.84_1635.7897n	No	1	#3326	2	55.8415	1635.79	6.8449	LQPGQGQQGYYPTSL		A9YSK4	High molecular weight glutenin subunit OS=Triticum aestivum OX=4565 GN=Glu-D1-1 PE=4 SV=1	9.07585	Condition 2	Condition 1	1.87e-06	8.18094	539.533	479.398	462.718	4475.14	4301	4671.08	540.856	485.013	443.588	4475.14	4198.22	4477.21	1	1	1	1	1	1
42.32_1347.6302n	No	1	#6134	2	42.3209	1347.63	6.1463	KACQQVMDQQL	[3] Carbamidomethyl C	A9YSK4	High molecular weight glutenin subunit OS=Triticum aestivum OX=4565 GN=Glu-D1-1 PE=4 SV=1	2.43165	Condition 2	Condition 1	0.000312492	10.0318	613.787	629.134	735.26	1443.4	1697.45	1669.4	615.292	636.502	704.863	1443.4	1656.89	1600.11	0	1	1	1	1	1
74.16_655.3704n	No	1	#5003	1	74.1603	655.37	6.0503	WGIPAL		A9YSK4	High molecular weight glutenin subunit OS=Triticum aestivum OX=4565 GN=Glu-D1-1 PE=4 SV=1	1.44035	Condition 2	Condition 1	0.00858545	12.3171	963.842	1030.43	806.496	1408.6	1308.56	1316.93	966.205	1042.5	773.153	1408.6	1277.29	1262.27	1	1	1	1	1	1
50.57_2913.2753n	No	1	#8638	3	50.5672	2913.28	5.1704	YPTSPQQSGQGQQPGQWQQPGQGQPGY		A9YSK4	High molecular weight glutenin subunit OS=Triticum aestivum OX=4565 GN=Glu-D1-1 PE=4 SV=1	2.17812	Condition 1	Condition 2	0.00150605	13.2118	1303.08	1110.81	1034.09	477.623	498.089	607.298	1306.28	1123.82	991.339	477.623	486.187	582.093	0	1	1	0	0	0
51.79_2036.8869n	No	1	#9984	2	51.7881	2036.89	6.2019	YYPTSPQESGQGQQPGQW		A9YSK4	High molecular weight glutenin subunit OS=Triticum aestivum OX=4565 GN=Glu-D1-1 PE=4 SV=1	1.43735	Condition 2	Condition 1	0.00350976	7.55923	1128.86	1292.36	1190.95	1863.17	1727.22	1601.59	1131.63	1307.5	1141.72	1863.17	1685.94	1535.11	0	1	1	1	1	1
57.48_658.3545n	No	1	#3742	1	57.4804	658.354	5.8884	TSPLQL	[5] Deamidation Q	A9YSK4	High molecular weight glutenin subunit OS=Triticum aestivum OX=4565 GN=Glu-D1-1 PE=4 SV=1	1.26495	Condition 1	Condition 2	0.0012534	4.94391	1274.35	1354.4	1406.36	1058.39	1062.62	1068.92	1277.48	1370.26	1348.22	1058.39	1037.23	1024.56	1	1	1	1	1	0
34.96_1074.5128n	No	1	#2038	2	34.9607	1074.51	6.9838	LQPGQGQQGY		A9YSK4	High molecular weight glutenin subunit OS=Triticum aestivum OX=4565 GN=Glu-D1-1 PE=4 SV=1	1.68872	Condition 2	Condition 1	0.2974	47.4037	1788.73	1370.38	1191.3	1111.33	3041.34	3193.93	1793.11	1386.42	1142.05	1111.33	2968.66	3061.37	1	0	0	0	1	1
47.47_1588.7612n	No	1	#4770	2	47.4667	1588.76	5.2163	YPTSPLQPGQGQPGY		A9YSK4	High molecular weight glutenin subunit OS=Triticum aestivum OX=4565 GN=Glu-D1-1 PE=4 SV=1	1.11462	Condition 2	Condition 1	0.20781	13.2264	1779.78	1501.86	1378.68	1712.87	1773.43	1708.19	1784.15	1519.45	1321.68	1712.87	1731.05	1637.3	0	0	1	1	0	0
40.19_1858.9000n	No	1	#11037	2	40.1905	1858.9	5.2982	QCERELQELQEREL	[2] Carbamidomethyl C	A9YSK4	High molecular weight glutenin subunit OS=Triticum aestivum OX=4565 GN=Glu-D1-1 PE=4 SV=1	1.12476	Condition 1	Condition 2	0.159646	11.2907	1411.38	1531.5	1526.84	1481.54	1308.72	1183.69	1414.84	1549.44	1463.72	1481.54	1277.44	1134.56	0	1	0	0	1	0
32.13_1309.6391n	No	1	#4839	2	32.1343	1309.64	5.5941	QQPAQGQQGQQL		A9YSK4	High molecular weight glutenin subunit OS=Triticum aestivum OX=4565 GN=Glu-D1-1 PE=4 SV=1	1.20071	Condition 2	Condition 1	0.365889	24.4369	1319.61	1537.71	1281.2	1208.01	1994.83	1766.34	1322.85	1555.72	1228.23	1208.01	1947.16	1693.03	1	1	1	1	1	1
51.52_1319.6238n	No	1	#6326	2	51.5202	1319.62	5.0894	YPTSSQLQPGQL	[6] Deamidation Q|[8] Deamidation Q	A9YSK4	High molecular weight glutenin subunit OS=Triticum aestivum OX=4565 GN=Glu-D1-1 PE=4 SV=1	1.13293	Condition 2	Condition 1	0.0107586	4.39841	1525.85	1558.03	1500.66	1658.43	1725.2	1810.36	1529.59	1576.28	1438.62	1658.43	1683.97	1735.22	1	0	1	0	0	0
73.82_794.3820n	No	1	#4490	1	73.824	794.382	5.7538	YPTSSQL		A9YSK4	High molecular weight glutenin subunit OS=Triticum aestivum OX=4565 GN=Glu-D1-1 PE=4 SV=1	4.59238	Condition 1	Condition 2	3.53e-05	10.8378	1978.3	1893.19	1733.54	429.845	434.664	355.999	1983.15	1915.36	1661.88	429.845	424.277	341.224	0	0	1	1	0	0
36.09_1176.5905n	No	1	#1762	2	36.0853	1176.59	6.5173	HVSVEHQAASL		A9YSK4	High molecular weight glutenin subunit OS=Triticum aestivum OX=4565 GN=Glu-D1-1 PE=4 SV=1	2.44021	Condition 2	Condition 1	0.000346953	12.5714	1946.33	1960.24	2078.88	5284.03	4165.72	5155.96	1951.1	1983.19	1992.93	5284.03	4066.17	4941.97	1	0	1	1	1	1
37.49_1043.5289n	No	1	#1978	2	37.4948	1043.53	6.1299	QELQEREL		A9YSK4	High molecular weight glutenin subunit OS=Triticum aestivum OX=4565 GN=Glu-D1-1 PE=4 SV=1	2.97032	Condition 2	Condition 1	5.83e-05	8.69345	1648	1961.99	1807.96	5051.76	5344.49	5696.79	1652.04	1984.97	1733.22	5051.76	5216.78	5460.36	1	1	0	1	0	1
50.87_1287.5918n	No	1	#5081	2	50.8688	1287.59	6.1899	YPTSPQQPGQW		A9YSK4	High molecular weight glutenin subunit OS=Triticum aestivum OX=4565 GN=Glu-D1-1 PE=4 SV=1	1.68037	Condition 1	Condition 2	0.00157342	9.36755	1981.27	2151.75	1876.77	1283.97	1224.66	1067.83	1986.13	2176.95	1799.18	1283.97	1195.39	1023.51	1	1	1	1	1	0
53.83_2373.1499n	No	1	#6375	3	53.8323	2373.15	5.0093	QELQERELKACQQVMDQQL	[11] Carbamidomethyl C	A9YSK4	High molecular weight glutenin subunit OS=Triticum aestivum OX=4565 GN=Glu-D1-1 PE=4 SV=1	1.06936	Condition 2	Condition 1	0.135532	4.8126	2185.51	2187.25	2341.13	2517.74	2290.54	2371.29	2190.87	2212.86	2244.34	2517.74	2235.8	2272.87	1	0	0	1	0	0
51.47_2856.3399n	No	1	#4859	3	51.4688	2856.34	6.1785	QQLGQGQSGYYPTSPQQPGQGQQPGQL		A9YSK4	High molecular weight glutenin subunit OS=Triticum aestivum OX=4565 GN=Glu-D1-1 PE=4 SV=1	1.11824	Condition 2	Condition 1	0.191692	12.9766	2849.85	2350.14	2247.76	2689.6	2823.79	2815.01	2856.84	2377.67	2154.83	2689.6	2756.31	2698.18	1	1	1	1	1	1
46.80_2674.2324n	No	1	#6203	3	46.7981	2674.23	6.1184	QPGQGQPGYDPTSPQQPGQGQQPGQL		A9YSK4	High molecular weight glutenin subunit OS=Triticum aestivum OX=4565 GN=Glu-D1-1 PE=4 SV=1	1.0121	Condition 1	Condition 2	0.655447	3.76652	2673.35	2578.56	2479.24	2537.39	2504.18	2597.17	2679.91	2608.76	2376.74	2537.39	2444.34	2489.38	1	1	1	1	1	1
37.11_1873.8091n	No	1	#2556	3	37.1073	1873.81	5.2618	YPTSPQESGQGQQPGQW		A9YSK4	High molecular weight glutenin subunit OS=Triticum aestivum OX=4565 GN=Glu-D1-1 PE=4 SV=1	1.12657	Condition 2	Condition 1	0.130871	10.0387	3240.19	3187.2	3384.33	4037	3299.41	3717.2	3248.13	3224.53	3244.41	4037	3220.56	3562.92	0	0	0	1	0	1
42.57_1522.7073n	No	1	#2113	2	42.572	1522.71	5.4818	QPGQGQQGYYPTSL		A9YSK4	High molecular weight glutenin subunit OS=Triticum aestivum OX=4565 GN=Glu-D1-1 PE=4 SV=1	1.22941	Condition 2	Condition 1	0.0214816	9.38854	2789.14	3368.03	3111.32	3919.14	3708.67	3766.96	2795.98	3407.47	2982.69	3919.14	3620.05	3610.62	1	1	1	0	1	1
27.53_1609.7240n	No	1	#3939	2	27.5319	1609.72	5.4168	QQSGQGQPGYYPTSL		A9YSK4	High molecular weight glutenin subunit OS=Triticum aestivum OX=4565 GN=Glu-D1-1 PE=4 SV=1	1.19149	Condition 2	Condition 1	0.0155064	6.31642	3426.98	3605.37	3883.03	4526.87	4168.49	4310.23	3435.38	3647.6	3722.5	4526.87	4068.87	4131.34	0	1	1	0	1	0
55.54_1716.8109n	No	1	#3505	2	55.5394	1716.81	6.7948	QQPGQGQPGYYPTSPL		A9YSK4	High molecular weight glutenin subunit OS=Triticum aestivum OX=4565 GN=Glu-D1-1 PE=4 SV=1	1.4594	Condition 1	Condition 2	0.0127908	14.9057	5215.4	4117.03	4021.34	3116.93	2899.86	3133.41	5228.19	4165.25	3855.09	3116.93	2830.56	3003.36	1	1	1	1	1	1
45.91_2109.0238n	No	1	#1851	3	45.913	2109.02	5.2763	RDISPECHPVVVSPVAGQY	[7] Carbamidomethyl C	A9YSK4	High molecular weight glutenin subunit OS=Triticum aestivum OX=4565 GN=Glu-D1-1 PE=4 SV=1	2.16102	Condition 1	Condition 2	1.02e-05	4.26493	5887.61	5671.75	5663.69	2748.67	2530.09	2691.12	5902.05	5738.18	5429.54	2748.67	2469.63	2579.43	0	0	0	1	1	0
46.14_2002.9579n	No	2	#8578,#1559	2,3	46.1444	2002.96	5.9057	QERELKACQQVMDQQL	[8] Carbamidomethyl C	A9YSK4	High molecular weight glutenin subunit OS=Triticum aestivum OX=4565 GN=Glu-D1-1 PE=4 SV=1	1.62426	Condition 2	Condition 1	0.00051268	7.48642	6456.85	5927.78	6888.01	10051.1	10536.5	10716.2	6472.68	5997.21	6603.24	10051.1	10284.7	10271.4	0	0	0	0	2	2
43.68_1527.7342n	No	1	#1597	2	43.6799	1527.73	7.3046	YPTSPQQPGQGQQL		A9YSK4	High molecular weight glutenin subunit OS=Triticum aestivum OX=4565 GN=Glu-D1-1 PE=4 SV=1	1.61717	Condition 2	Condition 1	0.000271782	5.73174	6922.49	7426.94	7313.57	10913.6	12160.9	11958.2	6939.47	7513.92	7011.21	10913.6	11870.3	11461.9	1	1	1	1	1	1
9.83_1212.5939n	No	1	#3187	2	9.82928	1212.59	5.1098	SGQGQRPGQWL		A9YSK4	High molecular weight glutenin subunit OS=Triticum aestivum OX=4565 GN=Glu-D1-1 PE=4 SV=1	898.578	Condition 1	Condition 2	0.00304581	173.205	7554.36	8005.24	5506.58	23.4439	0	0	7572.89	8099	5278.92	23.4439	0	0	0	1	1	0	0	0
45.18_1809.8658n	No	1	#1431	2	45.1818	1809.87	7.0588	YPTSPQQPGQGQQPGQL		A9YSK4	High molecular weight glutenin subunit OS=Triticum aestivum OX=4565 GN=Glu-D1-1 PE=4 SV=1	1.143	Condition 1	Condition 2	0.00747297	4.25315	13400.4	12954	13333.6	12041.9	11620.2	11060.6	13433.2	13105.7	12782.4	12041.9	11342.5	10601.6	1	1	1	1	1	1
41.62_1652.8126n	No	1	#906	2	41.618	1652.81	7.3089	LTSPQQSGQGQQPGQL		A9YSK4	High molecular weight glutenin subunit OS=Triticum aestivum OX=4565 GN=Glu-D1-1 PE=4 SV=1	1.28434	Condition 2	Condition 1	0.00424675	6.79368	12010.3	13744.9	13145	16110.4	16896.5	16953.9	12039.7	13905.8	12601.5	16110.4	16492.7	16250.3	1	1	1	1	1	1
50.53_2913.2806n	No	1	#1040	3	50.5329	2913.28	5.1704	YPTSPQQSGQGQQPGQWQQPGQGQPGY		A9YSK4	High molecular weight glutenin subunit OS=Triticum aestivum OX=4565 GN=Glu-D1-1 PE=4 SV=1	1.734	Condition 1	Condition 2	0.00554982	17.1067	17935	14965.3	12747.3	8868.31	8904.67	8552.01	17979	15140.6	12220.3	8868.31	8691.87	8197.08	0	1	1	0	0	0
51.91_4082.7736n	No	1	#1029	3	51.9081	4082.77	---	QQPAQGQQPGQGQQGQQPGQGQQGQQPGQGQQPGQGQPGY	[16] Deamidation Q|[20] Deamidation Q|[25] Deamidation Q	A9YSK4	High molecular weight glutenin subunit OS=Triticum aestivum OX=4565 GN=Glu-D1-1 PE=4 SV=1	7.00957	Condition 1	Condition 2	1.51e-05	11.435	29195.7	33377.4	32932.7	5107.33	4431.35	4086.38	29267.3	33768.4	31571.2	5107.33	4325.45	3916.78	0	0	0	0	0	0
53.26_1476.7236n	No	1	#18460	2	53.2558	1476.72	6.0716	VYYPTSPQQPGQL		A9YSK5	High molecular weight glutenin subunit OS=Triticum aestivum OX=4565 GN=Glu-B1-1 PE=4 SV=1	1.42464	Condition 2	Condition 1	0.153515	32.5893	168.909	85.6517	128.73	196.581	150	199.47	169.324	86.6548	123.408	196.581	146.416	191.191	0	1	0	0	1	1
52.78_2065.9042n	No	1	#4654	3	52.7758	2065.9	5.3677	QPGQGQQGYASPYHVSAEY		A9YSK5	High molecular weight glutenin subunit OS=Triticum aestivum OX=4565 GN=Glu-B1-1 PE=4 SV=1	4.82125	Condition 2	Condition 1	2.04e-05	10.7161	649.649	683.971	553.878	2942.05	3179.65	2978.4	651.242	691.982	530.979	2942.05	3103.66	2854.78	0	0	0	0	1	1
74.16_655.3704n	No	1	#5003	1	74.1603	655.37	6.0503	WGIPAL		A9YSK5	High molecular weight glutenin subunit OS=Triticum aestivum OX=4565 GN=Glu-B1-1 PE=4 SV=1	1.44035	Condition 2	Condition 1	0.00858545	12.3171	963.842	1030.43	806.496	1408.6	1308.56	1316.93	966.205	1042.5	773.153	1408.6	1277.29	1262.27	1	1	1	1	1	1
39.31_4509.0713n	No	1	#8732	4	39.3055	4509.07	5.1069	YPTSLRQPGQWQQPGQGQQPGQGQQGQQPGQGQQSGQGQQGY	[2] Hydroxyproline|[16] Deamidation Q	A9YSK5	High molecular weight glutenin subunit OS=Triticum aestivum OX=4565 GN=Glu-B1-1 PE=4 SV=1	1.89485	Condition 2	Condition 1	0.000716725	10.6439	1282.83	1098.36	1355.54	2350.89	2473.88	2255.78	1285.97	1111.22	1299.5	2350.89	2414.76	2162.16	0	1	0	0	1	0
34.96_1074.5128n	No	1	#2038	2	34.9607	1074.51	6.9838	LQPGQGQQGY		A9YSK5	High molecular weight glutenin subunit OS=Triticum aestivum OX=4565 GN=Glu-B1-1 PE=4 SV=1	1.68872	Condition 2	Condition 1	0.2974	47.4037	1788.73	1370.38	1191.3	1111.33	3041.34	3193.93	1793.11	1386.42	1142.05	1111.33	2968.66	3061.37	1	0	0	0	1	1
32.00_2544.1189n	No	1	#8284	3	31.9972	2544.12	6.3272	YPTSPQQPGQEQQSGQAQQSGQW		A9YSK5	High molecular weight glutenin subunit OS=Triticum aestivum OX=4565 GN=Glu-B1-1 PE=4 SV=1	1.0836	Condition 1	Condition 2	0.303926	10.9096	1405.16	1598.09	1750.07	1495.6	1434.28	1456.73	1408.61	1616.8	1677.71	1495.6	1400.01	1396.27	0	1	0	0	1	1
41.67_1517.7112n	No	1	#4906	2	41.6694	1517.71	5.8595	YPTSPQQSGQGQQL		A9YSK5	High molecular weight glutenin subunit OS=Triticum aestivum OX=4565 GN=Glu-B1-1 PE=4 SV=1	1.32337	Condition 2	Condition 1	0.00390305	7.90444	2525.25	2854.07	2472.18	3530.51	3365.51	3494.43	2531.44	2887.49	2369.97	3530.51	3285.09	3349.4	1	1	0	0	1	1
51.72_2232.0176n	No	1	#8083	3	51.7195	2232.02	5.0172	YPISPQQSGQGQQPGQGQQGY		A9YSK5	High molecular weight glutenin subunit OS=Triticum aestivum OX=4565 GN=Glu-B1-1 PE=4 SV=1	1.71078	Condition 1	Condition 2	0.000592649	8.28361	2510.43	2960.1	2701.96	1643.77	1621.65	1511.64	2516.58	2994.77	2590.25	1643.77	1582.9	1448.9	0	1	0	0	0	1
35.69_2544.1171n	No	1	#4117	3	35.691	2544.12	5.7372	YPTSPQQPGQEQQSGQAQQSGQW		A9YSK5	High molecular weight glutenin subunit OS=Triticum aestivum OX=4565 GN=Glu-B1-1 PE=4 SV=1	1.92855	Condition 1	Condition 2	0.000134115	6.67792	4781.87	4216.92	4698.12	2348.2	2284.35	2469.64	4793.6	4266.3	4503.88	2348.2	2229.76	2367.14	1	0	1	1	0	0
46.12_1214.5957n	No	1	#1958	2	46.1187	1214.6	7.0014	YPTSPQQPGQL		A9YSK5	High molecular weight glutenin subunit OS=Triticum aestivum OX=4565 GN=Glu-B1-1 PE=4 SV=1	1.55501	Condition 2	Condition 1	3.59e-05	2.70879	4423.89	4670.17	4556.06	6879.14	7093.69	7253.24	4434.74	4724.87	4367.7	6879.14	6924.18	6952.21	1	1	1	1	1	1
46.26_4139.7870n	No	1	#4885	3	46.2559	4139.79	---	YPGQASPQQSGQGQQPGQEQQPGQGQQDQQPGQRQQGY	[2] Hydroxyproline|[16] Hydroxyproline	A9YSK5	High molecular weight glutenin subunit OS=Triticum aestivum OX=4565 GN=Glu-B1-1 PE=4 SV=1	3.34062	Condition 1	Condition 2	0.00034781	16.2326	4460.74	5261.05	5097.1	1720.42	1475.13	1240.41	4471.68	5322.67	4886.37	1720.42	1439.88	1188.93	0	0	0	0	0	0
43.68_1527.7342n	No	1	#1597	2	43.6799	1527.73	7.3046	YPTSPQQPGQGQQL		A9YSK5	High molecular weight glutenin subunit OS=Triticum aestivum OX=4565 GN=Glu-B1-1 PE=4 SV=1	1.61717	Condition 2	Condition 1	0.000271782	5.73174	6922.49	7426.94	7313.57	10913.6	12160.9	11958.2	6939.47	7513.92	7011.21	10913.6	11870.3	11461.9	1	1	1	1	1	1
51.87_4139.7761n	No	1	#1278	4	51.8738	4139.78	5.3931	YPGQASPQQSGQGQQPGQEQQPGQGQQDQQPGQRQQGY	[2] Hydroxyproline|[16] Hydroxyproline	A9YSK5	High molecular weight glutenin subunit OS=Triticum aestivum OX=4565 GN=Glu-B1-1 PE=4 SV=1	6.15888	Condition 1	Condition 2	1.63e-06	7.13899	25118.6	25124.3	25060.6	4346	4113.11	3767.72	25180.2	25418.6	24024.5	4346	4014.82	3611.34	0	1	1	1	0	0
46.26_4139.7934n	No	2	#108,#181	4,5	46.2644	4139.79	5.1077	YPGQASPQQSGQGQQPGQEQQPGQGQQDQQPGQRQQGY	[2] Hydroxyproline|[16] Hydroxyproline	A9YSK5	High molecular weight glutenin subunit OS=Triticum aestivum OX=4565 GN=Glu-B1-1 PE=4 SV=1	2.29339	Condition 1	Condition 2	3.83e-05	7.00845	177853	174487	180134	82201.4	78463	71513	178289	176530	172687	82201.4	76588	68545	2	0	2	0	0	0
45.72_4139.7909n	No	3	#5558,#155,#34	3,4,5	45.7244	4139.79	5.1403	YPGQASPQQSGQGQQPGQEQQPGQGQQDQQPGQRQQGY	[2] Hydroxyproline|[7] Hydroxyproline	A9YSK5	High molecular weight glutenin subunit OS=Triticum aestivum OX=4565 GN=Glu-B1-1 PE=4 SV=1	1.86895	Condition 1	Condition 2	8.17e-06	2.80012	191105	199230	201655	103120	105428	108202	191574	201564	193318	103120	102909	103711	2	0	2	0	0	2
42.76_2778.3114n	No	1	#5862	3	42.7606	2778.31	6.8719	GQCVSQPQQQSQQQLGQQPQQQQL	[3] Carbamidomethyl C	A9Z176	Low molecular weight glutenin subunit OS=Triticum aestivum OX=4565 GN=LMW-m1 PE=4 SV=1	126.956	Condition 2	Condition 1	0.0163512	88.1445	48.2818	0	38.7569	3599.46	3932.7	3517.89	48.4002	0	37.1545	3599.46	3838.72	3371.88	0	0	0	1	1	1
45.01_2220.0981n	No	1	#13832	3	45.0104	2220.1	6.0076	SQQQPILPQQPPFSQQQQL	[2] Deamidation Q	A9Z176	Low molecular weight glutenin subunit OS=Triticum aestivum OX=4565 GN=LMW-m1 PE=4 SV=1	75.9393	Condition 2	Condition 1	0.0117185	120.612	28.3621	8.00774	0	926.091	948.292	887.519	28.4317	8.10153	0	926.091	925.631	850.684	0	0	0	1	0	1
53.83_1561.7542n	No	1	#20372	2	53.8323	1561.75	6.0516	SQQQQLFPQQPSF		A9Z176	Low molecular weight glutenin subunit OS=Triticum aestivum OX=4565 GN=LMW-m1 PE=4 SV=1	4.28283	Condition 2	Condition 1	0.00716947	42.4093	27.6859	70.3315	54.442	247.214	173.029	232.713	27.7538	71.1552	52.1912	247.214	168.895	223.055	0	1	1	1	0	0
61.48_1053.5259n	No	1	#21550	2	61.4816	1053.53	5.4752	GQQPQQQQL		A9Z176	Low molecular weight glutenin subunit OS=Triticum aestivum OX=4565 GN=LMW-m1 PE=4 SV=1	2.42881	Condition 1	Condition 2	0.27571	98.8343	45.1982	101.877	118.485	0	72.0265	37.3112	45.3091	103.071	113.587	0	70.3053	35.7626	1	1	0	0	0	0
32.42_1053.5224n	No	1	#10237	2	32.4194	1053.52	6.624	GQQPQQQQL		A9Z176	Low molecular weight glutenin subunit OS=Triticum aestivum OX=4565 GN=LMW-m1 PE=4 SV=1	14.4311	Condition 2	Condition 1	0.000314265	43.2947	134.387	115.008	247.852	2413.93	2439.62	2322.28	134.716	116.355	237.605	2413.93	2381.32	2225.89	0	0	0	1	1	1
36.83_1742.8022n	No	1	#3735	2	36.833	1742.8	7.6797	GQCVSQPQQQSQQQL	[3] Carbamidomethyl C	A9Z176	Low molecular weight glutenin subunit OS=Triticum aestivum OX=4565 GN=LMW-m1 PE=4 SV=1	10.485	Condition 2	Condition 1	4.94e-06	10.9553	419.589	336.707	386.867	3966.28	3801.61	4218.22	420.618	340.65	370.873	3966.28	3710.76	4043.15	0	0	0	1	1	1
37.23_849.3933n	No	1	#8404	2	37.2273	849.393	5.217	FPQQPSF		A9Z176	Low molecular weight glutenin subunit OS=Triticum aestivum OX=4565 GN=LMW-m1 PE=4 SV=1	1.17374	Condition 2	Condition 1	0.442196	25.6907	344.586	357.231	362.695	298.551	507.346	443.559	345.431	361.415	347.7	298.551	495.222	425.15	0	1	1	0	0	0
66.31_2944.4786n	No	1	#15969	3	66.3144	2944.48	6.0631	QQQPPFSQQQPILPQQPPFSQQQQL		A9Z176	Low molecular weight glutenin subunit OS=Triticum aestivum OX=4565 GN=LMW-m1 PE=4 SV=1	3.54528	Condition 2	Condition 1	0.000329154	18.5613	278.739	404.046	332.937	1207.82	1257.44	1135.75	279.422	408.779	319.172	1207.82	1227.39	1088.62	0	1	1	0	1	1
60.51_2733.3887n	No	1	#14120	3	60.5115	2733.39	5.4726	QQQPLPPQQTFPQQPLFSQQQQL		A9Z176	Low molecular weight glutenin subunit OS=Triticum aestivum OX=4565 GN=LMW-m1 PE=4 SV=1	1.01999	Condition 2	Condition 1	0.88279	14.213	620.354	496.983	550.923	597.382	475.849	628.372	621.876	502.803	528.146	597.382	464.477	602.292	1	0	0	1	0	1
42.17_704.3688n	No	1	#5619	1	42.1666	704.369	5.0954	ARSQML		A9Z176	Low molecular weight glutenin subunit OS=Triticum aestivum OX=4565 GN=LMW-m1 PE=4 SV=1	1.24367	Condition 2	Condition 1	0.00390763	5.25972	538.652	505.579	507.467	619.305	681.971	628.527	539.973	511.501	486.487	619.305	665.674	602.441	0	0	0	1	1	0
61.85_2219.1300n	No	1	#11898	3	61.8518	2219.13	6.6495	SQQQPILPQQPPFSQQQQL		A9Z176	Low molecular weight glutenin subunit OS=Triticum aestivum OX=4565 GN=LMW-m1 PE=4 SV=1	1.86521	Condition 2	Condition 1	0.001066	9.86328	846.617	849.916	743.195	1612.71	1593.42	1344.47	848.693	859.87	712.469	1612.71	1555.34	1288.67	1	1	1	1	1	0
68.49_2232.1276n	No	1	#11187	3	68.4941	2232.13	5.8647	QQQPPFSQQQPILPQQPPF		A9Z176	Low molecular weight glutenin subunit OS=Triticum aestivum OX=4565 GN=LMW-m1 PE=4 SV=1	1.49376	Condition 1	Condition 2	0.00372804	10.5689	1041.29	994.416	966.987	712.362	709.497	588.296	1043.85	1006.06	927.009	712.362	692.542	563.879	1	1	1	1	1	1
44.01_743.3620n	No	1	#7023	2	44.0057	743.362	6.9742	QQQPPF		A9Z176	Low molecular weight glutenin subunit OS=Triticum aestivum OX=4565 GN=LMW-m1 PE=4 SV=1	1.19507	Condition 1	Condition 2	0.0426256	9.46627	928.685	1094.36	1104.42	900.78	840.345	875.838	930.963	1107.18	1058.76	900.78	820.263	839.488	1	1	1	1	1	1
46.86_907.4772n	No	2	#7473,#2666	1,2	46.8581	907.477	6.7251	RTTTSVPF		A9Z176	Low molecular weight glutenin subunit OS=Triticum aestivum OX=4565 GN=LMW-m1 PE=4 SV=1	2.87302	Condition 2	Condition 1	1.14e-05	5.20525	1285.98	1361.45	1227.34	3623.85	3607.56	3900.87	1289.13	1377.39	1176.59	3623.85	3521.35	3738.97	1	0	2	2	2	0
48.30_1046.5927n	No	1	#1587	2	48.3004	1046.59	7.525	LQPHQIAQL		A9Z176	Low molecular weight glutenin subunit OS=Triticum aestivum OX=4565 GN=LMW-m1 PE=4 SV=1	4.13715	Condition 2	Condition 1	1.32e-05	8.55766	1833.09	1891.29	2001.53	8675.71	7538.52	7474.68	1837.58	1913.44	1918.78	8675.71	7358.37	7164.46	1	1	1	1	1	1
63.27_1506.7846n	No	1	#4386	2	63.2674	1506.78	7.1074	SQQQPILPQQPPF		A9Z176	Low molecular weight glutenin subunit OS=Triticum aestivum OX=4565 GN=LMW-m1 PE=4 SV=1	1.28214	Condition 1	Condition 2	3.89e-06	1.05474	2732.64	2698.03	2676.11	2119.43	2109.87	2093.55	2739.34	2729.63	2565.47	2119.43	2059.45	2006.66	1	1	1	1	1	1
56.12_1086.5364n	No	1	#2114	2	56.1157	1086.54	6.7688	YRTTTSVPF	[8] Hydroxyproline	A9Z176	Low molecular weight glutenin subunit OS=Triticum aestivum OX=4565 GN=LMW-m1 PE=4 SV=1	1.09696	Condition 1	Condition 2	0.0215106	4.25025	3654.63	3530.08	3357.23	3183.71	3192.8	3233.67	3663.6	3571.42	3218.43	3183.71	3116.5	3099.47	0	0	1	0	1	0
31.47_933.5079n	No	1	#1490	2	31.4657	933.508	6.2321	QPHQIAQL		A9Z176	Low molecular weight glutenin subunit OS=Triticum aestivum OX=4565 GN=LMW-m1 PE=4 SV=1	1.1173	Condition 1	Condition 2	0.016643	4.18749	4152.71	4487.04	4447.46	3805.14	3927.09	3980.99	4162.89	4539.59	4263.59	3805.14	3833.25	3815.76	1	1	1	1	1	1
42.10_1874.9409n	No	2	#8840,#3445	2,3	42.098	1874.94	6.0283	QQQPLPPQQTFPQQPL	[14] Deamidation Q	A9Z176	Low molecular weight glutenin subunit OS=Triticum aestivum OX=4565 GN=LMW-m1 PE=4 SV=1	1.30356	Condition 2	Condition 1	0.000457195	4.18768	5139.22	5411.78	4983.36	6837.7	6748.52	6663.71	5151.83	5475.16	4777.33	6837.7	6587.25	6387.14	0	0	2	2	0	0
57.51_924.5072n	No	2	#9808,#1845	1,2	57.5061	924.507	6.6076	VLPQQPPF		A9Z176	Low molecular weight glutenin subunit OS=Triticum aestivum OX=4565 GN=LMW-m1 PE=4 SV=1	1.52346	Condition 1	Condition 2	0.000117489	3.78454	7392.9	7517.23	6988.84	4674.36	4743.86	4956.29	7411.02	7605.27	6699.9	4674.36	4630.49	4750.59	2	2	2	2	2	2
67.56_1447.8426n	No	1	#1011	2	67.5586	1447.84	7.8316	VQQQIPVVQPSIL		A9Z176	Low molecular weight glutenin subunit OS=Triticum aestivum OX=4565 GN=LMW-m1 PE=4 SV=1	1.0219	Condition 2	Condition 1	0.471495	4.23413	9613.62	9645.8	9317.9	10184.5	9643.11	9375.48	9637.19	9758.77	8932.67	10184.5	9412.67	8986.36	1	1	1	1	1	1
43.84_830.3959n	No	2	#2756,#1611	1,2	43.8428	830.396	7.5811	SQQQPPF		A9Z176	Low molecular weight glutenin subunit OS=Triticum aestivum OX=4565 GN=LMW-m1 PE=4 SV=1	1.25905	Condition 1	Condition 2	0.00123527	4.28668	9560.7	10317.9	10296.7	7785.57	8063.56	8117.66	9584.14	10438.7	9870.99	7785.57	7870.86	7780.75	2	2	0	2	2	2
58.54_1873.9670n	No	1	#4253	2	58.5367	1873.97	6.2025	QQQPLPPQQTFPQQPL		A9Z176	Low molecular weight glutenin subunit OS=Triticum aestivum OX=4565 GN=LMW-m1 PE=4 SV=1	1.19639	Condition 1	Condition 2	0.0248533	8.79797	19124.6	16944.9	16169.9	14632.3	14680.1	14351.7	19171.5	17143.3	15501.3	14632.3	14329.3	13756.1	1	1	1	1	0	1
46.02_2359.1468n	No	1	#2080	3	46.0158	2359.15	6.4457	LQQQCSPVAMPQRLARSQML	[5] Carbamidomethyl C|[10] Oxidation M|[12] Deamidation Q|[18] Deamidation Q	A9Z176	Low molecular weight glutenin subunit OS=Triticum aestivum OX=4565 GN=LMW-m1 PE=4 SV=1	1.04025	Condition 2	Condition 1	0.0942674	2.84545	18839.4	18064.6	19081	19455	19641.3	19142.2	18885.6	18276.2	18292.1	19455	19172	18347.7	0	0	0	1	1	0
40.12_2823.2727n	No	1	#14114	3	40.1219	2823.27	5.895	QQSGQGQQGHYPTSLQQPGQGQQGHY		A9ZMG8	High-molecular-weight glutenin subunit y10 OS=Triticum aestivum OX=4565 GN=Glu1Dy10 PE=4 SV=1	72.9427	Condition 2	Condition 1	0.0123499	86.8251	14.9479	16.2396	0	946.998	763.365	564.537	14.9846	16.4297	0	946.998	745.123	541.107	0	0	0	1	0	1
41.64_1976.9163n	No	1	#21804	2	41.6352	1976.92	5.7199	TTAEGEASRQLQCEREL	[13] Carbamidomethyl C	A9ZMG8	High-molecular-weight glutenin subunit y10 OS=Triticum aestivum OX=4565 GN=Glu1Dy10 PE=4 SV=1	1.39497	Condition 2	Condition 1	0.341994	84.1327	19.1971	50.7057	126.229	73.3668	99.1191	101.112	19.2442	51.2996	121.011	73.3668	96.7505	96.9158	1	0	0	0	0	1
47.84_1212.5446n	No	1	#19068	2	47.8375	1212.54	5.4571	WGTSSQTVQGY		A9ZMG8	High-molecular-weight glutenin subunit y10 OS=Triticum aestivum OX=4565 GN=Glu1Dy10 PE=4 SV=1	5.58561	Condition 2	Condition 1	0.00569077	48.379	36.1476	51.4805	17.5944	198.716	229.994	159.022	36.2362	52.0834	16.867	198.716	224.497	152.422	0	0	0	1	0	1
28.79_1715.7575n	No	1	#17908	2	28.7938	1715.76	5.5971	QQPGQGQQQGQGQQGY		A9ZMG8	High-molecular-weight glutenin subunit y10 OS=Triticum aestivum OX=4565 GN=Glu1Dy10 PE=4 SV=1	3.22157	Condition 2	Condition 1	0.00572694	26.5378	256.287	159.182	270.871	785.895	873.434	551.765	256.916	161.047	259.673	785.895	852.562	528.865	0	0	0	1	1	0
36.29_2069.9578n	No	2	#9474,#5545	2,3	36.291	2069.96	6.4086	YPGQASPQQPGQGQQPGKW	[10] Hydroxyproline|[16] Hydroxyproline	A9ZMG8	High-molecular-weight glutenin subunit y10 OS=Triticum aestivum OX=4565 GN=Glu1Dy10 PE=4 SV=1	23.4626	Condition 2	Condition 1	1.32e-06	11.1213	148.317	175.643	184.468	3846.33	3988.33	4094.41	148.681	177.7	176.842	3846.33	3893.02	3924.48	0	0	0	2	2	2
43.85_2277.0424n	No	1	#15849	2	43.8514	2277.04	5.5685	QQPGQGQQQGQGQQGYYPTSL		A9ZMG8	High-molecular-weight glutenin subunit y10 OS=Triticum aestivum OX=4565 GN=Glu1Dy10 PE=4 SV=1	1.65331	Condition 2	Condition 1	0.142282	34.6488	123.203	257.052	202.477	392.089	354.07	217.278	123.505	260.062	194.106	392.089	345.609	208.26	0	0	0	0	1	1
57.19_1667.7992n	No	1	#9239	2	57.189	1667.8	6.0793	QQPGQGQQGYYPTSL	[N-term] Pyroglutamic acid	A9ZMG8	High-molecular-weight glutenin subunit y10 OS=Triticum aestivum OX=4565 GN=Glu1Dy10 PE=4 SV=1	4.97815	Condition 2	Condition 1	2.89e-05	11.9339	418.547	329.466	386.675	1786.39	1964.83	1897.42	419.574	333.324	370.688	1786.39	1917.87	1818.67	0	0	0	1	0	1
28.08_1083.5262n	No	1	#9068	2	28.0805	1083.53	5.6916	GQGQQPRQW		A9ZMG8	High-molecular-weight glutenin subunit y10 OS=Triticum aestivum OX=4565 GN=Glu1Dy10 PE=4 SV=1	1.13917	Condition 1	Condition 2	0.208436	13.521	444.02	494.969	579.516	416.983	462.891	453.123	445.109	500.766	555.557	416.983	451.83	434.317	0	0	1	0	1	1
25.61_1624.7460n	No	1	#9303	3	25.6077	1624.75	5.2803	QQPGQGQQGHYPTSL		A9ZMG8	High-molecular-weight glutenin subunit y10 OS=Triticum aestivum OX=4565 GN=Glu1Dy10 PE=4 SV=1	1.11999	Condition 2	Condition 1	0.35108	16.2532	598.926	659.146	667.723	605.571	712.311	838.994	600.394	666.866	640.118	605.571	695.289	804.173	0	1	0	1	1	1
47.67_1650.7812n	No	1	#10302	2	47.6661	1650.78	5.2989	YPTSLQQPGQGQQGY		A9ZMG8	High-molecular-weight glutenin subunit y10 OS=Triticum aestivum OX=4565 GN=Glu1Dy10 PE=4 SV=1	5.94406	Condition 2	Condition 1	5.99e-05	17.9596	471.29	661.466	519.279	3258.06	3335.74	3225.98	472.445	669.213	497.811	3258.06	3256.03	3092.09	1	0	1	0	0	0
34.67_1089.4851n	No	1	#6045	2	34.6693	1089.49	5.1235	QQPGQGQQGY		A9ZMG8	High-molecular-weight glutenin subunit y10 OS=Triticum aestivum OX=4565 GN=Glu1Dy10 PE=4 SV=1	3.67281	Condition 2	Condition 1	0.000173523	16.6831	621.103	867.408	730.594	2760.83	2667.43	2722.1	622.626	877.567	700.389	2760.83	2603.69	2609.12	1	0	0	1	1	1
43.83_2277.0391n	No	1	#7062	3	43.8342	2277.04	5.5685	QQPGQGQQQGQGQQGYYPTSL		A9ZMG8	High-molecular-weight glutenin subunit y10 OS=Triticum aestivum OX=4565 GN=Glu1Dy10 PE=4 SV=1	1.41358	Condition 2	Condition 1	0.00799784	10.3225	1063.19	879.034	911.965	1374.44	1419.1	1241.1	1065.8	889.33	874.262	1374.44	1385.19	1189.59	0	0	0	0	1	1
44.53_2246.0370n	No	2	#10446,#6706	2,3	44.5304	2246.04	6.3594	YPTSPQQPGQGQQLGQGQQGY		A9ZMG8	High-molecular-weight glutenin subunit y10 OS=Triticum aestivum OX=4565 GN=Glu1Dy10 PE=4 SV=1	1.82358	Condition 2	Condition 1	0.0085514	21.8063	2527.75	1691.02	1862.29	3425.51	3926.7	3737.13	2533.95	1710.83	1785.3	3425.51	3832.86	3582.02	2	2	2	2	2	2
52.06_742.3548n	No	1	#1213	1	52.0624	742.355	7.2477	YYPTSL		A9ZMG8	High-molecular-weight glutenin subunit y10 OS=Triticum aestivum OX=4565 GN=Glu1Dy10 PE=4 SV=1	3.20355	Condition 2	Condition 1	3.91e-06	5.18618	2482.78	2424.65	2675.1	8098.09	7887.96	8304.95	2488.87	2453.04	2564.51	8098.09	7699.46	7960.27	1	1	1	1	1	1
42.08_1344.6212n	No	1	#2871	2	42.0809	1344.62	5.1511	EACRQVVDQQL	[3] Carbamidomethyl C	A9ZMG8	High-molecular-weight glutenin subunit y10 OS=Triticum aestivum OX=4565 GN=Glu1Dy10 PE=4 SV=1	1.57203	Condition 2	Condition 1	7.06e-05	3.33971	2896.98	3069.93	2914.24	4814.93	4504.79	4641.68	2904.09	3105.88	2793.75	4814.93	4397.14	4449.03	0	0	0	1	1	0
58.74_1785.8300n	No	1	#3120	2	58.7355	1785.83	5.4369	QQGIFWGTSSQTVQGY		A9ZMG8	High-molecular-weight glutenin subunit y10 OS=Triticum aestivum OX=4565 GN=Glu1Dy10 PE=4 SV=1	2.08976	Condition 1	Condition 2	0.000606735	12.0787	3908.95	4134.88	4903.34	1958.92	2179.46	2057.16	3918.53	4183.31	4700.63	1958.92	2127.38	1971.78	1	0	1	0	0	0
41.64_1614.7405n	No	1	#1275	2	41.6352	1614.74	7.1692	QQSGQGQQGHYPTSL		A9ZMG8	High-molecular-weight glutenin subunit y10 OS=Triticum aestivum OX=4565 GN=Glu1Dy10 PE=4 SV=1	2.91936	Condition 2	Condition 1	3.81e-06	5.03773	4670.51	5160.36	4992.34	14205.1	14541.6	14527.7	4681.96	5220.8	4785.94	14205.1	14194.1	13924.7	0	0	1	1	1	1
57.06_960.5051n	No	2	#2001,#2064	1,2	57.0604	960.505	6.802	QQLQQGIF		A9ZMG8	High-molecular-weight glutenin subunit y10 OS=Triticum aestivum OX=4565 GN=Glu1Dy10 PE=4 SV=1	1.25694	Condition 2	Condition 1	0.000486694	3.37019	6292.21	6468.55	6727.46	8002.48	8201.48	8291.55	6307.64	6544.31	6449.33	8002.48	8005.49	7947.43	2	2	2	2	2	2
43.68_1527.7342n	No	1	#1597	2	43.6799	1527.73	7.3046	YPTSPQQPGQGQQL		A9ZMG8	High-molecular-weight glutenin subunit y10 OS=Triticum aestivum OX=4565 GN=Glu1Dy10 PE=4 SV=1	1.61717	Condition 2	Condition 1	0.000271782	5.73174	6922.49	7426.94	7313.57	10913.6	12160.9	11958.2	6939.47	7513.92	7011.21	10913.6	11870.3	11461.9	1	1	1	1	1	1
49.00_876.4238n	No	1	#1260	1	48.9967	876.424	6.4612	YPGETTPL		A9ZMG8	High-molecular-weight glutenin subunit y10 OS=Triticum aestivum OX=4565 GN=Glu1Dy10 PE=4 SV=1	1.20494	Condition 2	Condition 1	0.00337365	4.72986	7977.68	8530.83	8750.54	10028.7	10020.5	10386.3	7997.24	8630.74	8388.77	10028.7	9781.06	9955.27	1	1	1	1	1	1
44.40_2037.9674n	No	2	#2492,#2390	2,3	44.3999	2037.97	6.4972	YPGQASPQQPGQGQQPGKW		A9ZMG8	High-molecular-weight glutenin subunit y10 OS=Triticum aestivum OX=4565 GN=Glu1Dy10 PE=4 SV=1	1.77993	Condition 1	Condition 2	0.0030193	14.9078	10371.9	10039.4	10186.9	4744.01	6207.85	6238.91	10397.4	10157	9765.78	4744.01	6059.5	5979.97	1	1	1	1	1	1
52.78_698.3930n	No	2	#2341,#785	1,2	52.7843	698.393	6.1382	AGRLPW		A9ZMG8	High-molecular-weight glutenin subunit y10 OS=Triticum aestivum OX=4565 GN=Glu1Dy10 PE=4 SV=1	1.29843	Condition 1	Condition 2	0.0011163	4.98354	13504	14513.6	14880	10864.4	10917.6	11256	13537.1	14683.6	14264.8	10864.4	10656.7	10788.8	1	1	1	1	0	0
26.09_1678.7357n	No	1	#17312	2	26.0877	1678.74	5.4857	QQTGQGQQSGQGQQGY		B1B520	High-molecular-weight glutenin subunit 2.6 OS=Triticum aestivum OX=4565 GN=Glu-D1 PE=4 SV=2	4.62734	Condition 2	Condition 1	0.00795569	48.0964	84.5381	37.1512	110.615	374.091	328.136	372.721	84.7454	37.5863	106.041	374.091	320.294	357.252	0	0	1	1	1	1
49.05_2574.2170n	No	1	#16522	3	49.0482	2574.22	5.4313	LQPGQGQQGYYPTSPQQSGQGQQL		B1B520	High-molecular-weight glutenin subunit 2.6 OS=Triticum aestivum OX=4565 GN=Glu-D1 PE=4 SV=2	10.3261	Condition 2	Condition 1	0.000138868	27.3246	70.6023	47.2507	43.4743	630.133	500.62	535.127	70.7754	47.8041	41.677	630.133	488.657	512.917	0	0	0	0	1	1
53.24_1297.5931n	No	1	#15443	2	53.2386	1297.59	5.8131	GQGQQGYYPTSL		B1B520	High-molecular-weight glutenin subunit 2.6 OS=Triticum aestivum OX=4565 GN=Glu-D1 PE=4 SV=2	4.83143	Condition 2	Condition 1	0.000341859	22.4555	83.7521	79.9801	68.6632	470.621	316.081	336.099	83.9575	80.9168	65.8244	470.621	308.527	322.15	0	0	0	1	0	1
57.19_1538.7376n	No	1	#5589	2	57.189	1538.74	6.5049	QLGQGQQGYYPTSL		B1B520	High-molecular-weight glutenin subunit 2.6 OS=Triticum aestivum OX=4565 GN=Glu-D1 PE=4 SV=2	15.0322	Condition 2	Condition 1	6.65e-06	14.3683	158.346	134.679	179.972	2424.56	2444.06	2241.58	158.734	136.257	172.531	2424.56	2385.66	2148.55	1	1	1	1	1	1
39.39_1221.5480n	No	1	#10322	2	39.3912	1221.55	6.0329	QQPGQGQPGYY		B1B520	High-molecular-weight glutenin subunit 2.6 OS=Triticum aestivum OX=4565 GN=Glu-D1 PE=4 SV=2	18.8027	Condition 2	Condition 1	0.00013775	35.9686	81.1871	162.757	105.43	2062.17	2381.75	2125.28	81.3862	164.663	101.071	2062.17	2324.83	2037.07	0	0	0	1	1	1
50.22_2956.3877n	No	1	#7112	3	50.2244	2956.39	5.6937	QQSGQGQHGYYPTSPQLSGQGQRPGQW		B1B520	High-molecular-weight glutenin subunit 2.6 OS=Triticum aestivum OX=4565 GN=Glu-D1 PE=4 SV=2	11.5219	Condition 2	Condition 1	0.000340083	35.1558	139.895	220.601	292.975	2621.04	2583.21	2324.99	140.238	223.185	280.863	2621.04	2521.48	2228.49	0	1	0	1	1	0
55.91_692.3731n	No	1	#7479	1	55.91	692.373	5.9646	YLTSPL		B1B520	High-molecular-weight glutenin subunit 2.6 OS=Triticum aestivum OX=4565 GN=Glu-D1 PE=4 SV=2	1.53082	Condition 2	Condition 1	0.000167299	4.40811	408.777	429.951	405.247	621.268	616.097	666.94	409.779	434.987	388.493	621.268	601.374	639.26	0	0	0	1	1	1
54.80_1888.8684n	No	1	#17383	2	54.8022	1888.87	5.1893	YPTSPQQSGQGQQLGQW		B1B520	High-molecular-weight glutenin subunit 2.6 OS=Triticum aestivum OX=4565 GN=Glu-D1 PE=4 SV=2	1.2296	Condition 1	Condition 2	0.184021	17.4674	328.022	462.326	376.988	349.999	328.85	270.51	328.827	467.741	361.403	349.999	320.992	259.283	0	1	1	0	0	0
55.84_1635.7897n	No	1	#3326	2	55.8415	1635.79	6.8449	LQPGQGQQGYYPTSL		B1B520	High-molecular-weight glutenin subunit 2.6 OS=Triticum aestivum OX=4565 GN=Glu-D1 PE=4 SV=2	9.07585	Condition 2	Condition 1	1.87e-06	8.18094	539.533	479.398	462.718	4475.14	4301	4671.08	540.856	485.013	443.588	4475.14	4198.22	4477.21	1	1	1	1	1	1
42.32_1347.6302n	No	1	#6134	2	42.3209	1347.63	6.1463	KACQQVMDQQL	[3] Carbamidomethyl C	B1B520	High-molecular-weight glutenin subunit 2.6 OS=Triticum aestivum OX=4565 GN=Glu-D1 PE=4 SV=2	2.43165	Condition 2	Condition 1	0.000312492	10.0318	613.787	629.134	735.26	1443.4	1697.45	1669.4	615.292	636.502	704.863	1443.4	1656.89	1600.11	0	1	1	1	1	1
74.16_655.3704n	No	1	#5003	1	74.1603	655.37	6.0503	WGIPAL		B1B520	High-molecular-weight glutenin subunit 2.6 OS=Triticum aestivum OX=4565 GN=Glu-D1 PE=4 SV=2	1.44035	Condition 2	Condition 1	0.00858545	12.3171	963.842	1030.43	806.496	1408.6	1308.56	1316.93	966.205	1042.5	773.153	1408.6	1277.29	1262.27	1	1	1	1	1	1
50.57_2913.2753n	No	1	#8638	3	50.5672	2913.28	5.1704	YPTSPQQSGQGQQPGQWQQPGQGQPGY		B1B520	High-molecular-weight glutenin subunit 2.6 OS=Triticum aestivum OX=4565 GN=Glu-D1 PE=4 SV=2	2.17812	Condition 1	Condition 2	0.00150605	13.2118	1303.08	1110.81	1034.09	477.623	498.089	607.298	1306.28	1123.82	991.339	477.623	486.187	582.093	0	1	1	0	0	0
51.79_2036.8869n	No	1	#9984	2	51.7881	2036.89	6.2019	YYPTSPQESGQGQQPGQW		B1B520	High-molecular-weight glutenin subunit 2.6 OS=Triticum aestivum OX=4565 GN=Glu-D1 PE=4 SV=2	1.43735	Condition 2	Condition 1	0.00350976	7.55923	1128.86	1292.36	1190.95	1863.17	1727.22	1601.59	1131.63	1307.5	1141.72	1863.17	1685.94	1535.11	0	1	1	1	1	1
57.48_658.3545n	No	1	#3742	1	57.4804	658.354	5.8884	TSPLQL	[5] Deamidation Q	B1B520	High-molecular-weight glutenin subunit 2.6 OS=Triticum aestivum OX=4565 GN=Glu-D1 PE=4 SV=2	1.26495	Condition 1	Condition 2	0.0012534	4.94391	1274.35	1354.4	1406.36	1058.39	1062.62	1068.92	1277.48	1370.26	1348.22	1058.39	1037.23	1024.56	1	1	1	1	1	0
34.96_1074.5128n	No	1	#2038	2	34.9607	1074.51	6.9838	LQPGQGQQGY		B1B520	High-molecular-weight glutenin subunit 2.6 OS=Triticum aestivum OX=4565 GN=Glu-D1 PE=4 SV=2	1.68872	Condition 2	Condition 1	0.2974	47.4037	1788.73	1370.38	1191.3	1111.33	3041.34	3193.93	1793.11	1386.42	1142.05	1111.33	2968.66	3061.37	1	0	0	0	1	1
47.47_1588.7612n	No	1	#4770	2	47.4667	1588.76	5.2163	YPTSPLQPGQGQPGY		B1B520	High-molecular-weight glutenin subunit 2.6 OS=Triticum aestivum OX=4565 GN=Glu-D1 PE=4 SV=2	1.11462	Condition 2	Condition 1	0.20781	13.2264	1779.78	1501.86	1378.68	1712.87	1773.43	1708.19	1784.15	1519.45	1321.68	1712.87	1731.05	1637.3	0	0	1	1	0	0
40.19_1858.9000n	No	1	#11037	2	40.1905	1858.9	5.2982	QCERELQELQEREL	[2] Carbamidomethyl C	B1B520	High-molecular-weight glutenin subunit 2.6 OS=Triticum aestivum OX=4565 GN=Glu-D1 PE=4 SV=2	1.12476	Condition 1	Condition 2	0.159646	11.2907	1411.38	1531.5	1526.84	1481.54	1308.72	1183.69	1414.84	1549.44	1463.72	1481.54	1277.44	1134.56	0	1	0	0	1	0
32.13_1309.6391n	No	1	#4839	2	32.1343	1309.64	5.5941	QQPAQGQQGQQL		B1B520	High-molecular-weight glutenin subunit 2.6 OS=Triticum aestivum OX=4565 GN=Glu-D1 PE=4 SV=2	1.20071	Condition 2	Condition 1	0.365889	24.4369	1319.61	1537.71	1281.2	1208.01	1994.83	1766.34	1322.85	1555.72	1228.23	1208.01	1947.16	1693.03	1	1	1	1	1	1
51.52_1319.6238n	No	1	#6326	2	51.5202	1319.62	5.0894	YPTSSQLQPGQL	[6] Deamidation Q|[8] Deamidation Q	B1B520	High-molecular-weight glutenin subunit 2.6 OS=Triticum aestivum OX=4565 GN=Glu-D1 PE=4 SV=2	1.13293	Condition 2	Condition 1	0.0107586	4.39841	1525.85	1558.03	1500.66	1658.43	1725.2	1810.36	1529.59	1576.28	1438.62	1658.43	1683.97	1735.22	1	0	1	0	0	0
73.82_794.3820n	No	1	#4490	1	73.824	794.382	5.7538	YPTSSQL		B1B520	High-molecular-weight glutenin subunit 2.6 OS=Triticum aestivum OX=4565 GN=Glu-D1 PE=4 SV=2	4.59238	Condition 1	Condition 2	3.53e-05	10.8378	1978.3	1893.19	1733.54	429.845	434.664	355.999	1983.15	1915.36	1661.88	429.845	424.277	341.224	0	0	1	1	0	0
36.09_1176.5905n	No	1	#1762	2	36.0853	1176.59	6.5173	HVSVEHQAASL		B1B520	High-molecular-weight glutenin subunit 2.6 OS=Triticum aestivum OX=4565 GN=Glu-D1 PE=4 SV=2	2.44021	Condition 2	Condition 1	0.000346953	12.5714	1946.33	1960.24	2078.88	5284.03	4165.72	5155.96	1951.1	1983.19	1992.93	5284.03	4066.17	4941.97	1	0	1	1	1	1
37.49_1043.5289n	No	1	#1978	2	37.4948	1043.53	6.1299	QELQEREL		B1B520	High-molecular-weight glutenin subunit 2.6 OS=Triticum aestivum OX=4565 GN=Glu-D1 PE=4 SV=2	2.97032	Condition 2	Condition 1	5.83e-05	8.69345	1648	1961.99	1807.96	5051.76	5344.49	5696.79	1652.04	1984.97	1733.22	5051.76	5216.78	5460.36	1	1	0	1	0	1
50.87_1287.5918n	No	1	#5081	2	50.8688	1287.59	6.1899	YPTSPQQPGQW		B1B520	High-molecular-weight glutenin subunit 2.6 OS=Triticum aestivum OX=4565 GN=Glu-D1 PE=4 SV=2	1.68037	Condition 1	Condition 2	0.00157342	9.36755	1981.27	2151.75	1876.77	1283.97	1224.66	1067.83	1986.13	2176.95	1799.18	1283.97	1195.39	1023.51	1	1	1	1	1	0
53.83_2373.1499n	No	1	#6375	3	53.8323	2373.15	5.0093	QELQERELKACQQVMDQQL	[11] Carbamidomethyl C	B1B520	High-molecular-weight glutenin subunit 2.6 OS=Triticum aestivum OX=4565 GN=Glu-D1 PE=4 SV=2	1.06936	Condition 2	Condition 1	0.135532	4.8126	2185.51	2187.25	2341.13	2517.74	2290.54	2371.29	2190.87	2212.86	2244.34	2517.74	2235.8	2272.87	1	0	0	1	0	0
51.47_2856.3399n	No	1	#4859	3	51.4688	2856.34	6.1785	QQLGQGQSGYYPTSPQQPGQGQQPGQL		B1B520	High-molecular-weight glutenin subunit 2.6 OS=Triticum aestivum OX=4565 GN=Glu-D1 PE=4 SV=2	1.11824	Condition 2	Condition 1	0.191692	12.9766	2849.85	2350.14	2247.76	2689.6	2823.79	2815.01	2856.84	2377.67	2154.83	2689.6	2756.31	2698.18	1	1	1	1	1	1
43.14_4601.1195n	No	1	#8475	4	43.1377	4601.12	5.7495	GQGQQGQQPGQGQQPAQGQQGQQPGQGQQGQQPGQGQQPGQGQPW		B1B520	High-molecular-weight glutenin subunit 2.6 OS=Triticum aestivum OX=4565 GN=Glu-D1 PE=4 SV=2	2.57652	Condition 1	Condition 2	0.000252108	12.7158	2355.21	2390.41	2292.04	970.176	984.238	777.048	2360.98	2418.41	2197.28	970.176	960.718	744.798	1	1	0	0	0	1
46.80_2674.2324n	No	1	#6203	3	46.7981	2674.23	6.1184	QPGQGQPGYDPTSPQQPGQGQQPGQL		B1B520	High-molecular-weight glutenin subunit 2.6 OS=Triticum aestivum OX=4565 GN=Glu-D1 PE=4 SV=2	1.0121	Condition 1	Condition 2	0.655447	3.76652	2673.35	2578.56	2479.24	2537.39	2504.18	2597.17	2679.91	2608.76	2376.74	2537.39	2444.34	2489.38	1	1	1	1	1	1
41.67_1517.7112n	No	1	#4906	2	41.6694	1517.71	5.8595	YPTSPQQSGQGQQL		B1B520	High-molecular-weight glutenin subunit 2.6 OS=Triticum aestivum OX=4565 GN=Glu-D1 PE=4 SV=2	1.32337	Condition 2	Condition 1	0.00390305	7.90444	2525.25	2854.07	2472.18	3530.51	3365.51	3494.43	2531.44	2887.49	2369.97	3530.51	3285.09	3349.4	1	1	0	0	1	1
37.11_1873.8091n	No	1	#2556	3	37.1073	1873.81	5.2618	YPTSPQESGQGQQPGQW		B1B520	High-molecular-weight glutenin subunit 2.6 OS=Triticum aestivum OX=4565 GN=Glu-D1 PE=4 SV=2	1.12657	Condition 2	Condition 1	0.130871	10.0387	3240.19	3187.2	3384.33	4037	3299.41	3717.2	3248.13	3224.53	3244.41	4037	3220.56	3562.92	0	0	0	1	0	1
42.57_1522.7073n	No	1	#2113	2	42.572	1522.71	5.4818	QPGQGQQGYYPTSL		B1B520	High-molecular-weight glutenin subunit 2.6 OS=Triticum aestivum OX=4565 GN=Glu-D1 PE=4 SV=2	1.22941	Condition 2	Condition 1	0.0214816	9.38854	2789.14	3368.03	3111.32	3919.14	3708.67	3766.96	2795.98	3407.47	2982.69	3919.14	3620.05	3610.62	1	1	1	0	1	1
46.43_1147.5277n	No	1	#4685	2	46.4273	1147.53	5.2517	QQPEQGQPGY	[N-term] Pyroglutamic acid	B1B520	High-molecular-weight glutenin subunit 2.6 OS=Triticum aestivum OX=4565 GN=Glu-D1 PE=4 SV=2	1.04927	Condition 2	Condition 1	0.606067	12.5756	3248.04	3397.95	3478.6	3057.73	3631.1	3934.63	3256	3437.74	3334.78	3057.73	3544.32	3771.33	0	1	0	0	1	0
27.53_1609.7240n	No	1	#3939	2	27.5319	1609.72	5.4168	QQSGQGQPGYYPTSL		B1B520	High-molecular-weight glutenin subunit 2.6 OS=Triticum aestivum OX=4565 GN=Glu-D1 PE=4 SV=2	1.19149	Condition 2	Condition 1	0.0155064	6.31642	3426.98	3605.37	3883.03	4526.87	4168.49	4310.23	3435.38	3647.6	3722.5	4526.87	4068.87	4131.34	0	1	1	0	1	0
37.60_2843.3682n	No	1	#3414	3	37.5977	2843.37	6.661	AQGQQGQQPAQVQQGQQPAQGQQGQQL		B1B520	High-molecular-weight glutenin subunit 2.6 OS=Triticum aestivum OX=4565 GN=Glu-D1 PE=4 SV=2	1.05533	Condition 2	Condition 1	0.360551	7.62595	4120.67	3859.74	4490.63	4126.79	4524.21	4510.03	4130.78	3904.94	4304.97	4126.79	4416.1	4322.84	1	1	1	1	1	1
55.54_1716.8109n	No	1	#3505	2	55.5394	1716.81	6.7948	QQPGQGQPGYYPTSPL		B1B520	High-molecular-weight glutenin subunit 2.6 OS=Triticum aestivum OX=4565 GN=Glu-D1 PE=4 SV=2	1.4594	Condition 1	Condition 2	0.0127908	14.9057	5215.4	4117.03	4021.34	3116.93	2899.86	3133.41	5228.19	4165.25	3855.09	3116.93	2830.56	3003.36	1	1	1	1	1	1
46.12_1214.5957n	No	1	#1958	2	46.1187	1214.6	7.0014	YPTSPQQPGQL		B1B520	High-molecular-weight glutenin subunit 2.6 OS=Triticum aestivum OX=4565 GN=Glu-D1 PE=4 SV=2	1.55501	Condition 2	Condition 1	3.59e-05	2.70879	4423.89	4670.17	4556.06	6879.14	7093.69	7253.24	4434.74	4724.87	4367.7	6879.14	6924.18	6952.21	1	1	1	1	1	1
45.91_2109.0238n	No	1	#1851	3	45.913	2109.02	5.2763	RDISPECHPVVVSPVAGQY	[7] Carbamidomethyl C	B1B520	High-molecular-weight glutenin subunit 2.6 OS=Triticum aestivum OX=4565 GN=Glu-D1 PE=4 SV=2	2.16102	Condition 1	Condition 2	1.02e-05	4.26493	5887.61	5671.75	5663.69	2748.67	2530.09	2691.12	5902.05	5738.18	5429.54	2748.67	2469.63	2579.43	0	0	0	1	1	0
46.14_2002.9579n	No	2	#8578,#1559	2,3	46.1444	2002.96	5.9057	QERELKACQQVMDQQL	[8] Carbamidomethyl C	B1B520	High-molecular-weight glutenin subunit 2.6 OS=Triticum aestivum OX=4565 GN=Glu-D1 PE=4 SV=2	1.62426	Condition 2	Condition 1	0.00051268	7.48642	6456.85	5927.78	6888.01	10051.1	10536.5	10716.2	6472.68	5997.21	6603.24	10051.1	10284.7	10271.4	0	0	0	0	2	2
9.83_1212.5939n	No	1	#3187	2	9.82928	1212.59	5.1098	SGQGQRPGQWL		B1B520	High-molecular-weight glutenin subunit 2.6 OS=Triticum aestivum OX=4565 GN=Glu-D1 PE=4 SV=2	898.578	Condition 1	Condition 2	0.00304581	173.205	7554.36	8005.24	5506.58	23.4439	0	0	7572.89	8099	5278.92	23.4439	0	0	0	1	1	0	0	0
45.18_1809.8658n	No	1	#1431	2	45.1818	1809.87	7.0588	YPTSPQQPGQGQQPGQL		B1B520	High-molecular-weight glutenin subunit 2.6 OS=Triticum aestivum OX=4565 GN=Glu-D1 PE=4 SV=2	1.143	Condition 1	Condition 2	0.00747297	4.25315	13400.4	12954	13333.6	12041.9	11620.2	11060.6	13433.2	13105.7	12782.4	12041.9	11342.5	10601.6	1	1	1	1	1	1
41.62_1652.8126n	No	1	#906	2	41.618	1652.81	7.3089	LTSPQQSGQGQQPGQL		B1B520	High-molecular-weight glutenin subunit 2.6 OS=Triticum aestivum OX=4565 GN=Glu-D1 PE=4 SV=2	1.28434	Condition 2	Condition 1	0.00424675	6.79368	12010.3	13744.9	13145	16110.4	16896.5	16953.9	12039.7	13905.8	12601.5	16110.4	16492.7	16250.3	1	1	1	1	1	1
50.53_2913.2806n	No	1	#1040	3	50.5329	2913.28	5.1704	YPTSPQQSGQGQQPGQWQQPGQGQPGY		B1B520	High-molecular-weight glutenin subunit 2.6 OS=Triticum aestivum OX=4565 GN=Glu-D1 PE=4 SV=2	1.734	Condition 1	Condition 2	0.00554982	17.1067	17935	14965.3	12747.3	8868.31	8904.67	8552.01	17979	15140.6	12220.3	8868.31	8691.87	8197.08	0	1	1	0	0	0
51.49_2327.0830n	No	2	#3020,#1142	2,3	51.486	2327.08	6.7759	QQPEQGQPGYYPTSPQQPGQL		B1B520	High-molecular-weight glutenin subunit 2.6 OS=Triticum aestivum OX=4565 GN=Glu-D1 PE=4 SV=2	1.03297	Condition 1	Condition 2	0.59261	8.76599	17276.8	15590.8	14530.5	14952	15330.9	15602.3	17319.2	15773.4	13929.8	14952	14964.5	14954.7	2	2	2	2	2	2
42.68_4267.8825n	No	3	#488,#137,#6315	4,5,6	42.6806	4267.88	5.273	YPGQASPQRPGQGQQPGQGQQSGQGQQGYYPTSPQQPGQW		B1B520	High-molecular-weight glutenin subunit 2.6 OS=Triticum aestivum OX=4565 GN=Glu-D1 PE=4 SV=2	2.09275	Condition 1	Condition 2	4.52e-08	1.18273	89142.9	90364.6	91270.1	43089.4	43197.6	43101.7	89361.5	91423	87496.7	43089.4	42165.3	41312.8	0	2	0	2	0	2
40.34_1712.8102n	No	1	#9115	2	40.3448	1712.81	6.2686	SQQQQQFPQQQQPL	[5] Deamidation Q	B2BZC4	LMW-m glutenin subunit 1557N24-M OS=Triticum aestivum OX=4565 GN=Glu-B3 PE=4 SV=1	1.03566	Condition 2	Condition 1	0.71812	11.3455	848.824	737.694	926.831	767.809	952.058	883.121	850.905	746.334	888.513	767.809	929.307	846.468	1	1	1	0	0	0
27.89_996.4985n	No	1	#10628	2	27.8919	996.499	5.4694	QQPQQQQL		B2BZC4	LMW-m glutenin subunit 1557N24-M OS=Triticum aestivum OX=4565 GN=Glu-B3 PE=4 SV=1	1.16306	Condition 2	Condition 1	0.182399	14.0156	940.657	1017.78	1038.28	973.813	1252.21	1259.34	942.963	1029.7	995.357	973.813	1222.29	1207.08	0	0	0	1	0	1
72.53_1575.6979n	No	1	#6639	2	72.5285	1575.7	5.4433	GQCSFQQPQQQQL	[3] Carbamidomethyl C	B2BZC4	LMW-m glutenin subunit 1557N24-M OS=Triticum aestivum OX=4565 GN=Glu-B3 PE=4 SV=1	2.78564	Condition 2	Condition 1	0.000182159	9.61431	1251.02	1174.5	1032.61	3305.46	3434.86	2892.77	1254.09	1188.26	989.915	3305.46	3352.77	2772.71	1	1	0	0	0	0
54.58_822.4600n	No	2	#6995,#7862	1,2	54.5781	822.46	7.0262	QQQPLPL		B2BZC4	LMW-m glutenin subunit 1557N24-M OS=Triticum aestivum OX=4565 GN=Glu-B3 PE=4 SV=1	2.20319	Condition 1	Condition 2	0.000561751	10.4602	1774.39	1661.93	1440.23	674.593	738.963	799.849	1778.74	1681.39	1380.68	674.593	721.304	766.652	2	2	2	0	2	2
51.98_1132.5769n	No	1	#1421	2	51.9766	1132.58	7.6263	QQLNPCKVF	[6] Carbamidomethyl C	B2BZC4	LMW-m glutenin subunit 1557N24-M OS=Triticum aestivum OX=4565 GN=Glu-B3 PE=4 SV=1	10.3262	Condition 2	Condition 1	3.54e-07	5.23417	1533.53	1701.68	1639.93	17179.3	16122.3	17040	1537.29	1721.61	1572.13	17179.3	15737.1	16332.7	1	1	1	1	1	1
54.32_825.4402n	No	2	#11228,#5836	1,2	54.3209	825.44	6.6833	LPQQPPF		B2BZC4	LMW-m glutenin subunit 1557N24-M OS=Triticum aestivum OX=4565 GN=Glu-B3 PE=4 SV=1	2.47834	Condition 1	Condition 2	6.11e-05	6.42834	1665.82	1858.04	1842.7	756.851	739.356	669.178	1669.9	1879.8	1766.52	756.851	721.688	641.405	2	2	2	1	1	1
48.30_1046.5927n	No	1	#1587	2	48.3004	1046.59	7.525	LQPHQIAQL		B2BZC4	LMW-m glutenin subunit 1557N24-M OS=Triticum aestivum OX=4565 GN=Glu-B3 PE=4 SV=1	4.13715	Condition 2	Condition 1	1.32e-05	8.55766	1833.09	1891.29	2001.53	8675.71	7538.52	7474.68	1837.58	1913.44	1918.78	8675.71	7358.37	7164.46	1	1	1	1	1	1
43.65_1086.5264n	No	1	#6742	2	43.6457	1086.53	5.6973	SQQQQQPPF		B2BZC4	LMW-m glutenin subunit 1557N24-M OS=Triticum aestivum OX=4565 GN=Glu-B3 PE=4 SV=1	1.18687	Condition 2	Condition 1	0.009569	4.72778	2132.86	2294.11	2301.78	2565.48	2804.39	2616.31	2138.09	2320.98	2206.62	2565.48	2737.38	2507.72	1	0	0	1	1	1
60.29_1595.7570n	No	1	#4627	2	60.2886	1595.76	5.6698	GQWPQQQQVPQGTL	[2] Deamidation Q|[11] Deamidation Q	B2BZC4	LMW-m glutenin subunit 1557N24-M OS=Triticum aestivum OX=4565 GN=Glu-B3 PE=4 SV=1	1.3531	Condition 1	Condition 2	0.00168928	6.43022	3320.32	3147.21	3197.22	2226.61	2532.77	2383.29	3328.47	3184.07	3065.03	2226.61	2472.25	2284.38	0	1	1	0	0	0
31.47_933.5079n	No	1	#1490	2	31.4657	933.508	6.2321	QPHQIAQL		B2BZC4	LMW-m glutenin subunit 1557N24-M OS=Triticum aestivum OX=4565 GN=Glu-B3 PE=4 SV=1	1.1173	Condition 1	Condition 2	0.016643	4.18749	4152.71	4487.04	4447.46	3805.14	3927.09	3980.99	4162.89	4539.59	4263.59	3805.14	3833.25	3815.76	1	1	1	1	1	1
60.41_1620.8255n	No	1	#2953	2	60.4086	1620.83	7.2832	SQQQQPVLPQQPPF		B2BZC4	LMW-m glutenin subunit 1557N24-M OS=Triticum aestivum OX=4565 GN=Glu-B3 PE=4 SV=1	1.77886	Condition 1	Condition 2	0.000468958	9.53059	4940.46	4887.83	4732.42	2596.23	3028.06	2561.13	4952.58	4945.08	4536.77	2596.23	2955.7	2454.84	1	1	1	1	1	1
43.84_830.3959n	No	2	#2756,#1611	1,2	43.8428	830.396	7.5811	SQQQPPF		B2BZC4	LMW-m glutenin subunit 1557N24-M OS=Triticum aestivum OX=4565 GN=Glu-B3 PE=4 SV=1	1.25905	Condition 1	Condition 2	0.00123527	4.28668	9560.7	10317.9	10296.7	7785.57	8063.56	8117.66	9584.14	10438.7	9870.99	7785.57	7870.86	7780.75	2	2	0	2	2	2
43.79_958.4549n	No	2	#4611,#1021	1,2	43.7914	958.455	7.6329	SQQQQPPF		B2BZC4	LMW-m glutenin subunit 1557N24-M OS=Triticum aestivum OX=4565 GN=Glu-B3 PE=4 SV=1	1.19987	Condition 1	Condition 2	0.00159236	3.04223	13729	14271.7	14502.2	11465.5	11775.7	12181.8	13762.6	14438.9	13902.7	11465.5	11494.3	11676.2	1	2	2	2	2	2
46.26_1593.7920n	No	1	#1037	2	46.2559	1593.79	5.281	GQWPQQQQVPQGTL		B2BZC4	LMW-m glutenin subunit 1557N24-M OS=Triticum aestivum OX=4565 GN=Glu-B3 PE=4 SV=1	1.14091	Condition 1	Condition 2	0.00628391	3.73898	30617.6	28934.7	28554.1	26355.7	25668.4	25200.3	30692.6	29273.6	27373.6	26355.7	25055	24154.4	0	0	0	1	1	1
57.57_1770.8347n	No	2	#382,#20959	2,3	57.5747	1770.83	7.9101	SQQQQPPFSQQQPPF		B2BZC4	LMW-m glutenin subunit 1557N24-M OS=Triticum aestivum OX=4565 GN=Glu-B3 PE=4 SV=1	1.3931	Condition 1	Condition 2	0.000332537	4.30084	41774.2	39762.2	38354.4	28826.3	27885.7	29348.5	41876.7	40227.9	36768.7	28826.3	27219.3	28130.4	2	2	2	2	1	1
58.57_1289.6612n	No	1	#11611	2	58.5709	1289.66	6.0795	SIILQEQQQGF		B2BZC5	LMW-m glutenin subunit 0072P19-M OS=Triticum aestivum OX=4565 GN=Glu-D3 PE=4 SV=1	182.503	Condition 2	Condition 1	0.00280998	101.185	4.35437	0	9.0203	816.756	841.585	782.583	4.36505	0	8.64737	816.756	821.474	750.103	0	0	0	1	1	1
38.76_3050.4946n	No	1	#7911	3	38.7569	3050.49	5.5671	VQPQQQQPQQSVQGVYQPQQQSQQQL	[8] Hydroxyproline	B2BZC5	LMW-m glutenin subunit 0072P19-M OS=Triticum aestivum OX=4565 GN=Glu-D3 PE=4 SV=1	4.14045	Condition 2	Condition 1	0.000111343	15.6905	430.81	339.067	325.493	1447.13	1620.15	1468.04	431.866	343.038	312.036	1447.13	1581.43	1407.11	1	0	0	1	0	0
58.11_1919.0733n	No	1	#6173	3	58.108	1919.07	5.2901	LQPHQIARLEVMTSIAL		B2BZC5	LMW-m glutenin subunit 0072P19-M OS=Triticum aestivum OX=4565 GN=Glu-D3 PE=4 SV=1	3.91215	Condition 1	Condition 2	0.000298181	19.1486	1613.84	1429.16	1422.33	459.009	367.296	315.097	1617.8	1445.89	1363.53	459.009	358.519	302.02	1	1	1	1	0	0
51.98_1132.5769n	No	1	#1421	2	51.9766	1132.58	7.6263	QQLNPCKVF	[6] Carbamidomethyl C	B2BZC5	LMW-m glutenin subunit 0072P19-M OS=Triticum aestivum OX=4565 GN=Glu-D3 PE=4 SV=1	10.3262	Condition 2	Condition 1	3.54e-07	5.23417	1533.53	1701.68	1639.93	17179.3	16122.3	17040	1537.29	1721.61	1572.13	17179.3	15737.1	16332.7	1	1	1	1	1	1
57.90_1180.5933n	No	1	#3189	2	57.9023	1180.59	6.6841	ERPWQQQPL		B2BZC5	LMW-m glutenin subunit 0072P19-M OS=Triticum aestivum OX=4565 GN=Glu-D3 PE=4 SV=1	1.63306	Condition 1	Condition 2	0.000186511	4.90159	2347.65	2360.5	2527.51	1478.73	1403.63	1548.38	2353.41	2388.15	2423.02	1478.73	1370.09	1484.12	1	0	0	1	1	1
32.83_868.4412n	No	2	#6522,#3366	1,2	32.8309	868.441	7.9564	QQPQQQL		B2BZC5	LMW-m glutenin subunit 0072P19-M OS=Triticum aestivum OX=4565 GN=Glu-D3 PE=4 SV=1	1.79772	Condition 2	Condition 1	6.17e-05	5.5674	3861.32	4301.95	4191.59	7383.29	7510.18	7317.1	3870.79	4352.34	4018.3	7383.29	7330.71	7013.42	2	0	0	2	0	0
38.78_3050.4933n	No	2	#1383,#4713	4,5	38.7826	3050.49	5.5671	VQPQQQQPQQSVQGVYQPQQQSQQQL	[8] Hydroxyproline	B2BZC5	LMW-m glutenin subunit 0072P19-M OS=Triticum aestivum OX=4565 GN=Glu-D3 PE=4 SV=1	2.37887	Condition 2	Condition 1	1.11e-06	3.07687	7720.37	7371.27	7818.27	18115.5	18225.8	18158.4	7739.3	7457.6	7495.04	18115.5	17790.2	17404.8	1	0	0	1	0	0
42.76_2778.3114n	No	1	#5862	3	42.7606	2778.31	6.8719	GQCVSQPQQQSQQQLGQQPQQQQL	[3] Carbamidomethyl C	B2BZC7	LMW-m glutenin subunit 0154A5-M OS=Triticum aestivum OX=4565 GN=Glu-D3 PE=4 SV=1	126.956	Condition 2	Condition 1	0.0163512	88.1445	48.2818	0	38.7569	3599.46	3932.7	3517.89	48.4002	0	37.1545	3599.46	3838.72	3371.88	0	0	0	1	1	1
32.42_1053.5224n	No	1	#10237	2	32.4194	1053.52	6.624	GQQPQQQQL		B2BZC7	LMW-m glutenin subunit 0154A5-M OS=Triticum aestivum OX=4565 GN=Glu-D3 PE=4 SV=1	14.4311	Condition 2	Condition 1	0.000314265	43.2947	134.387	115.008	247.852	2413.93	2439.62	2322.28	134.716	116.355	237.605	2413.93	2381.32	2225.89	0	0	0	1	1	1
36.83_1742.8022n	No	1	#3735	2	36.833	1742.8	7.6797	GQCVSQPQQQSQQQL	[3] Carbamidomethyl C	B2BZC7	LMW-m glutenin subunit 0154A5-M OS=Triticum aestivum OX=4565 GN=Glu-D3 PE=4 SV=1	10.485	Condition 2	Condition 1	4.94e-06	10.9553	419.589	336.707	386.867	3966.28	3801.61	4218.22	420.618	340.65	370.873	3966.28	3710.76	4043.15	0	0	0	1	1	1
46.86_907.4772n	No	2	#7473,#2666	1,2	46.8581	907.477	6.7251	RTTTSVPF		B2BZC7	LMW-m glutenin subunit 0154A5-M OS=Triticum aestivum OX=4565 GN=Glu-D3 PE=4 SV=1	2.87302	Condition 2	Condition 1	1.14e-05	5.20525	1285.98	1361.45	1227.34	3623.85	3607.56	3900.87	1289.13	1377.39	1176.59	3623.85	3521.35	3738.97	1	0	2	2	2	0
51.98_1132.5769n	No	1	#1421	2	51.9766	1132.58	7.6263	QQLNPCKVF	[6] Carbamidomethyl C	B2BZC7	LMW-m glutenin subunit 0154A5-M OS=Triticum aestivum OX=4565 GN=Glu-D3 PE=4 SV=1	10.3262	Condition 2	Condition 1	3.54e-07	5.23417	1533.53	1701.68	1639.93	17179.3	16122.3	17040	1537.29	1721.61	1572.13	17179.3	15737.1	16332.7	1	1	1	1	1	1
48.30_1046.5927n	No	1	#1587	2	48.3004	1046.59	7.525	LQPHQIAQL		B2BZC7	LMW-m glutenin subunit 0154A5-M OS=Triticum aestivum OX=4565 GN=Glu-D3 PE=4 SV=1	4.13715	Condition 2	Condition 1	1.32e-05	8.55766	1833.09	1891.29	2001.53	8675.71	7538.52	7474.68	1837.58	1913.44	1918.78	8675.71	7358.37	7164.46	1	1	1	1	1	1
57.90_1180.5933n	No	1	#3189	2	57.9023	1180.59	6.6841	ERPWQQQPL		B2BZC7	LMW-m glutenin subunit 0154A5-M OS=Triticum aestivum OX=4565 GN=Glu-D3 PE=4 SV=1	1.63306	Condition 1	Condition 2	0.000186511	4.90159	2347.65	2360.5	2527.51	1478.73	1403.63	1548.38	2353.41	2388.15	2423.02	1478.73	1370.09	1484.12	1	0	0	1	1	1
31.47_933.5079n	No	1	#1490	2	31.4657	933.508	6.2321	QPHQIAQL		B2BZC7	LMW-m glutenin subunit 0154A5-M OS=Triticum aestivum OX=4565 GN=Glu-D3 PE=4 SV=1	1.1173	Condition 1	Condition 2	0.016643	4.18749	4152.71	4487.04	4447.46	3805.14	3927.09	3980.99	4162.89	4539.59	4263.59	3805.14	3833.25	3815.76	1	1	1	1	1	1
42.76_2778.3114n	No	1	#5862	3	42.7606	2778.31	6.8719	GQCVSQPQQQSQQQLGQQPQQQQL	[3] Carbamidomethyl C	B2BZD0	LMW-s glutenin subunit 0359D24-S OS=Triticum aestivum OX=4565 GN=Glu-D3 PE=4 SV=1	126.956	Condition 2	Condition 1	0.0163512	88.1445	48.2818	0	38.7569	3599.46	3932.7	3517.89	48.4002	0	37.1545	3599.46	3838.72	3371.88	0	0	0	1	1	1
61.48_1053.5259n	No	1	#21550	2	61.4816	1053.53	5.4752	GQQPQQQQL		B2BZD0	LMW-s glutenin subunit 0359D24-S OS=Triticum aestivum OX=4565 GN=Glu-D3 PE=4 SV=1	2.42881	Condition 1	Condition 2	0.27571	98.8343	45.1982	101.877	118.485	0	72.0265	37.3112	45.3091	103.071	113.587	0	70.3053	35.7626	1	1	0	0	0	0
32.42_1053.5224n	No	1	#10237	2	32.4194	1053.52	6.624	GQQPQQQQL		B2BZD0	LMW-s glutenin subunit 0359D24-S OS=Triticum aestivum OX=4565 GN=Glu-D3 PE=4 SV=1	14.4311	Condition 2	Condition 1	0.000314265	43.2947	134.387	115.008	247.852	2413.93	2439.62	2322.28	134.716	116.355	237.605	2413.93	2381.32	2225.89	0	0	0	1	1	1
36.83_1742.8022n	No	1	#3735	2	36.833	1742.8	7.6797	GQCVSQPQQQSQQQL	[3] Carbamidomethyl C	B2BZD0	LMW-s glutenin subunit 0359D24-S OS=Triticum aestivum OX=4565 GN=Glu-D3 PE=4 SV=1	10.485	Condition 2	Condition 1	4.94e-06	10.9553	419.589	336.707	386.867	3966.28	3801.61	4218.22	420.618	340.65	370.873	3966.28	3710.76	4043.15	0	0	0	1	1	1
28.52_1760.8076n	No	1	#13352	3	28.5196	1760.81	5.5726	SQQQPPFSQQQQPSF		B2BZD0	LMW-s glutenin subunit 0359D24-S OS=Triticum aestivum OX=4565 GN=Glu-D3 PE=4 SV=1	1.34217	Condition 1	Condition 2	0.164791	22.9681	707.583	499.549	727.102	428.994	607.03	405.105	709.318	505.4	697.042	428.994	592.524	388.292	0	1	0	1	0	1
42.17_704.3688n	No	1	#5619	1	42.1666	704.369	5.0954	ARSQML		B2BZD0	LMW-s glutenin subunit 0359D24-S OS=Triticum aestivum OX=4565 GN=Glu-D3 PE=4 SV=1	1.24367	Condition 2	Condition 1	0.00390763	5.25972	538.652	505.579	507.467	619.305	681.971	628.527	539.973	511.501	486.487	619.305	665.674	602.441	0	0	0	1	1	0
62.91_1634.8425n	No	1	#10839	2	62.9074	1634.84	6.557	SQQQQPILPQQPPF		B2BZD0	LMW-s glutenin subunit 0359D24-S OS=Triticum aestivum OX=4565 GN=Glu-D3 PE=4 SV=1	1.70594	Condition 1	Condition 2	0.00343601	13.7142	832.417	887.112	917.611	570.526	539.677	435.654	834.458	897.502	879.674	570.526	526.781	417.572	1	1	1	1	1	0
46.86_907.4772n	No	2	#7473,#2666	1,2	46.8581	907.477	6.7251	RTTTSVPF		B2BZD0	LMW-s glutenin subunit 0359D24-S OS=Triticum aestivum OX=4565 GN=Glu-D3 PE=4 SV=1	2.87302	Condition 2	Condition 1	1.14e-05	5.20525	1285.98	1361.45	1227.34	3623.85	3607.56	3900.87	1289.13	1377.39	1176.59	3623.85	3521.35	3738.97	1	0	2	2	2	0
51.98_1132.5769n	No	1	#1421	2	51.9766	1132.58	7.6263	QQLNPCKVF	[6] Carbamidomethyl C	B2BZD0	LMW-s glutenin subunit 0359D24-S OS=Triticum aestivum OX=4565 GN=Glu-D3 PE=4 SV=1	10.3262	Condition 2	Condition 1	3.54e-07	5.23417	1533.53	1701.68	1639.93	17179.3	16122.3	17040	1537.29	1721.61	1572.13	17179.3	15737.1	16332.7	1	1	1	1	1	1
48.30_1046.5927n	No	1	#1587	2	48.3004	1046.59	7.525	LQPHQIAQL		B2BZD0	LMW-s glutenin subunit 0359D24-S OS=Triticum aestivum OX=4565 GN=Glu-D3 PE=4 SV=1	4.13715	Condition 2	Condition 1	1.32e-05	8.55766	1833.09	1891.29	2001.53	8675.71	7538.52	7474.68	1837.58	1913.44	1918.78	8675.71	7358.37	7164.46	1	1	1	1	1	1
64.31_1892.9793n	No	2	#4165,#21878	2,3	64.306	1892.98	7.3758	SQQQQQPVLPQQQIPF		B2BZD0	LMW-s glutenin subunit 0359D24-S OS=Triticum aestivum OX=4565 GN=Glu-D3 PE=4 SV=1	1.06585	Condition 1	Condition 2	0.221984	6.30117	2282.98	2403.75	2118.95	2137.07	2210.74	2037.4	2288.58	2431.9	2031.35	2137.07	2157.91	1952.84	1	1	1	1	1	1
56.12_1086.5364n	No	1	#2114	2	56.1157	1086.54	6.7688	YRTTTSVPF	[8] Hydroxyproline	B2BZD0	LMW-s glutenin subunit 0359D24-S OS=Triticum aestivum OX=4565 GN=Glu-D3 PE=4 SV=1	1.09696	Condition 1	Condition 2	0.0215106	4.25025	3654.63	3530.08	3357.23	3183.71	3192.8	3233.67	3663.6	3571.42	3218.43	3183.71	3116.5	3099.47	0	0	1	0	1	0
31.47_933.5079n	No	1	#1490	2	31.4657	933.508	6.2321	QPHQIAQL		B2BZD0	LMW-s glutenin subunit 0359D24-S OS=Triticum aestivum OX=4565 GN=Glu-D3 PE=4 SV=1	1.1173	Condition 1	Condition 2	0.016643	4.18749	4152.71	4487.04	4447.46	3805.14	3927.09	3980.99	4162.89	4539.59	4263.59	3805.14	3833.25	3815.76	1	1	1	1	1	1
60.41_1620.8255n	No	1	#2953	2	60.4086	1620.83	7.2832	SQQQQPVLPQQPPF		B2BZD0	LMW-s glutenin subunit 0359D24-S OS=Triticum aestivum OX=4565 GN=Glu-D3 PE=4 SV=1	1.77886	Condition 1	Condition 2	0.000468958	9.53059	4940.46	4887.83	4732.42	2596.23	3028.06	2561.13	4952.58	4945.08	4536.77	2596.23	2955.7	2454.84	1	1	1	1	1	1
45.96_664.3942n	No	2	#563,#2312	1,2	45.9558	664.394	7.5806	VHPSIL		B2BZD0	LMW-s glutenin subunit 0359D24-S OS=Triticum aestivum OX=4565 GN=Glu-D3 PE=4 SV=1	1.94431	Condition 2	Condition 1	1.56e-06	2.27569	5811.99	6082.51	5959.01	11483.4	11490.2	11739.1	5826.24	6153.75	5712.65	11483.4	11215.6	11251.9	2	1	2	0	0	2
43.84_830.3959n	No	2	#2756,#1611	1,2	43.8428	830.396	7.5811	SQQQPPF		B2BZD0	LMW-s glutenin subunit 0359D24-S OS=Triticum aestivum OX=4565 GN=Glu-D3 PE=4 SV=1	1.25905	Condition 1	Condition 2	0.00123527	4.28668	9560.7	10317.9	10296.7	7785.57	8063.56	8117.66	9584.14	10438.7	9870.99	7785.57	7870.86	7780.75	2	2	0	2	2	2
43.79_958.4549n	No	2	#4611,#1021	1,2	43.7914	958.455	7.6329	SQQQQPPF		B2BZD0	LMW-s glutenin subunit 0359D24-S OS=Triticum aestivum OX=4565 GN=Glu-D3 PE=4 SV=1	1.19987	Condition 1	Condition 2	0.00159236	3.04223	13729	14271.7	14502.2	11465.5	11775.7	12181.8	13762.6	14438.9	13902.7	11465.5	11494.3	11676.2	1	2	2	2	2	2
51.47_943.4805n	No	2	#1283,#808	1,2	51.4688	943.481	6.478	SQQQLPPF		B2BZD0	LMW-s glutenin subunit 0359D24-S OS=Triticum aestivum OX=4565 GN=Glu-D3 PE=4 SV=1	1.20854	Condition 2	Condition 1	0.000926353	3.04754	18684	18177.3	17579.2	21856.4	21498.8	22438.5	18729.8	18390.2	16852.4	21856.4	20985.1	21507.3	2	0	2	2	0	0
57.57_1770.8347n	No	2	#382,#20959	2,3	57.5747	1770.83	7.9101	SQQQQPPFSQQQPPF		B2BZD0	LMW-s glutenin subunit 0359D24-S OS=Triticum aestivum OX=4565 GN=Glu-D3 PE=4 SV=1	1.3931	Condition 1	Condition 2	0.000332537	4.30084	41774.2	39762.2	38354.4	28826.3	27885.7	29348.5	41876.7	40227.9	36768.7	28826.3	27219.3	28130.4	2	2	2	2	1	1
60.80_2589.2710n	No	1	#18488	3	60.7959	2589.27	5.3955	SQQRPPFSQQQQQPVLPQQPPF		B2BZD1	LMW-D8 OS=Triticum aestivum OX=4565 GN=Glu-D3 PE=4 SV=1	2.52335	Condition 1	Condition 2	0.015743	35.732	216.227	232.126	249.887	107.328	114.948	54.4355	216.757	234.845	239.556	107.328	112.201	52.1762	1	1	0	0	0	0
42.17_704.3688n	No	1	#5619	1	42.1666	704.369	5.0954	ARSQML		B2BZD1	LMW-D8 OS=Triticum aestivum OX=4565 GN=Glu-D3 PE=4 SV=1	1.24367	Condition 2	Condition 1	0.00390763	5.25972	538.652	505.579	507.467	619.305	681.971	628.527	539.973	511.501	486.487	619.305	665.674	602.441	0	0	0	1	1	0
49.73_1680.8178n	No	1	#16735	2	49.7272	1680.82	5.5533	SQQQQPFPQQQQPL		B2BZD1	LMW-D8 OS=Triticum aestivum OX=4565 GN=Glu-D3 PE=4 SV=1	2.74323	Condition 1	Condition 2	0.000116195	8.8343	490.37	536.545	458.704	198.829	169.658	173.072	491.572	542.829	439.74	198.829	165.604	165.889	0	1	1	1	0	0
53.36_655.3911n	No	1	#7186	1	53.3586	655.391	6.1833	VQPSIL		B2BZD1	LMW-D8 OS=Triticum aestivum OX=4565 GN=Glu-D3 PE=4 SV=1	1.66857	Condition 1	Condition 2	0.00670807	15.9418	1102.17	1198.46	1069.85	769.888	557.75	692.346	1104.87	1212.49	1025.62	769.888	544.421	663.612	1	1	1	0	1	1
36.02_1024.5820n	No	2	#1075,#6971	2,3	36.0167	1024.58	5.5761	VQPSILQQL		B2BZD1	LMW-D8 OS=Triticum aestivum OX=4565 GN=Glu-D3 PE=4 SV=1	5.01708	Condition 2	Condition 1	1.17e-05	9.00694	1542.32	1639.8	1706.91	8847.76	8292.22	7388.68	1546.1	1659.01	1636.34	8847.76	8094.06	7082.02	1	0	0	1	1	1
51.98_1132.5769n	No	1	#1421	2	51.9766	1132.58	7.6263	QQLNPCKVF	[6] Carbamidomethyl C	B2BZD1	LMW-D8 OS=Triticum aestivum OX=4565 GN=Glu-D3 PE=4 SV=1	10.3262	Condition 2	Condition 1	3.54e-07	5.23417	1533.53	1701.68	1639.93	17179.3	16122.3	17040	1537.29	1721.61	1572.13	17179.3	15737.1	16332.7	1	1	1	1	1	1
48.30_1046.5927n	No	1	#1587	2	48.3004	1046.59	7.525	LQPHQIAQL		B2BZD1	LMW-D8 OS=Triticum aestivum OX=4565 GN=Glu-D3 PE=4 SV=1	4.13715	Condition 2	Condition 1	1.32e-05	8.55766	1833.09	1891.29	2001.53	8675.71	7538.52	7474.68	1837.58	1913.44	1918.78	8675.71	7358.37	7164.46	1	1	1	1	1	1
53.36_1789.9074n	No	1	#6691	2	53.3586	1789.91	6.0033	SQHQQPVLPQQQIPY		B2BZD1	LMW-D8 OS=Triticum aestivum OX=4565 GN=Glu-D3 PE=4 SV=1	2.17808	Condition 1	Condition 2	0.00147304	16.9874	2087.53	2024.67	1990.8	1084.45	949.325	768.237	2092.65	2048.39	1908.49	1084.45	926.639	736.353	0	1	1	1	1	0
60.29_1595.7570n	No	1	#4627	2	60.2886	1595.76	5.6698	GQWPQQQQVPQGTL	[2] Deamidation Q|[11] Deamidation Q	B2BZD1	LMW-D8 OS=Triticum aestivum OX=4565 GN=Glu-D3 PE=4 SV=1	1.3531	Condition 1	Condition 2	0.00168928	6.43022	3320.32	3147.21	3197.22	2226.61	2532.77	2383.29	3328.47	3184.07	3065.03	2226.61	2472.25	2284.38	0	1	1	0	0	0
31.47_933.5079n	No	1	#1490	2	31.4657	933.508	6.2321	QPHQIAQL		B2BZD1	LMW-D8 OS=Triticum aestivum OX=4565 GN=Glu-D3 PE=4 SV=1	1.1173	Condition 1	Condition 2	0.016643	4.18749	4152.71	4487.04	4447.46	3805.14	3927.09	3980.99	4162.89	4539.59	4263.59	3805.14	3833.25	3815.76	1	1	1	1	1	1
62.84_1288.7167n	No	1	#966	2	62.8388	1288.72	5.3806	LQPHQIAQLEL		B2BZD1	LMW-D8 OS=Triticum aestivum OX=4565 GN=Glu-D3 PE=4 SV=1	1.19297	Condition 2	Condition 1	0.00345746	4.9957	6078.75	6212.92	6680.57	7512.44	7549.28	7571.52	6093.66	6285.68	6404.37	7512.44	7368.88	7257.27	1	1	1	0	1	1
43.84_830.3959n	No	2	#2756,#1611	1,2	43.8428	830.396	7.5811	SQQQPPF		B2BZD1	LMW-D8 OS=Triticum aestivum OX=4565 GN=Glu-D3 PE=4 SV=1	1.25905	Condition 1	Condition 2	0.00123527	4.28668	9560.7	10317.9	10296.7	7785.57	8063.56	8117.66	9584.14	10438.7	9870.99	7785.57	7870.86	7780.75	2	2	0	2	2	2
43.79_958.4549n	No	2	#4611,#1021	1,2	43.7914	958.455	7.6329	SQQQQPPF		B2BZD1	LMW-D8 OS=Triticum aestivum OX=4565 GN=Glu-D3 PE=4 SV=1	1.19987	Condition 1	Condition 2	0.00159236	3.04223	13729	14271.7	14502.2	11465.5	11775.7	12181.8	13762.6	14438.9	13902.7	11465.5	11494.3	11676.2	1	2	2	2	2	2
46.26_1593.7920n	No	1	#1037	2	46.2559	1593.79	5.281	GQWPQQQQVPQGTL		B2BZD1	LMW-D8 OS=Triticum aestivum OX=4565 GN=Glu-D3 PE=4 SV=1	1.14091	Condition 1	Condition 2	0.00628391	3.73898	30617.6	28934.7	28554.1	26355.7	25668.4	25200.3	30692.6	29273.6	27373.6	26355.7	25055	24154.4	0	0	0	1	1	1
57.57_1770.8347n	No	2	#382,#20959	2,3	57.5747	1770.83	7.9101	SQQQQPPFSQQQPPF		B2BZD1	LMW-D8 OS=Triticum aestivum OX=4565 GN=Glu-D3 PE=4 SV=1	1.3931	Condition 1	Condition 2	0.000332537	4.30084	41774.2	39762.2	38354.4	28826.3	27885.7	29348.5	41876.7	40227.9	36768.7	28826.3	27219.3	28130.4	2	2	2	2	1	1
40.34_1712.8102n	No	1	#9115	2	40.3448	1712.81	6.2686	SQQQQQFPQQQQPL	[5] Deamidation Q	B2BZD2	LMW-m glutenin subunit 0877L13-M OS=Triticum aestivum OX=4565 GN=Glu-D3 PE=4 SV=1	1.03566	Condition 2	Condition 1	0.71812	11.3455	848.824	737.694	926.831	767.809	952.058	883.121	850.905	746.334	888.513	767.809	929.307	846.468	1	1	1	0	0	0
51.98_1132.5769n	No	1	#1421	2	51.9766	1132.58	7.6263	QQLNPCKVF	[6] Carbamidomethyl C	B2BZD2	LMW-m glutenin subunit 0877L13-M OS=Triticum aestivum OX=4565 GN=Glu-D3 PE=4 SV=1	10.3262	Condition 2	Condition 1	3.54e-07	5.23417	1533.53	1701.68	1639.93	17179.3	16122.3	17040	1537.29	1721.61	1572.13	17179.3	15737.1	16332.7	1	1	1	1	1	1
54.32_825.4402n	No	2	#11228,#5836	1,2	54.3209	825.44	6.6833	LPQQPPF		B2BZD2	LMW-m glutenin subunit 0877L13-M OS=Triticum aestivum OX=4565 GN=Glu-D3 PE=4 SV=1	2.47834	Condition 1	Condition 2	6.11e-05	6.42834	1665.82	1858.04	1842.7	756.851	739.356	669.178	1669.9	1879.8	1766.52	756.851	721.688	641.405	2	2	2	1	1	1
48.30_1046.5927n	No	1	#1587	2	48.3004	1046.59	7.525	LQPHQIAQL		B2BZD2	LMW-m glutenin subunit 0877L13-M OS=Triticum aestivum OX=4565 GN=Glu-D3 PE=4 SV=1	4.13715	Condition 2	Condition 1	1.32e-05	8.55766	1833.09	1891.29	2001.53	8675.71	7538.52	7474.68	1837.58	1913.44	1918.78	8675.71	7358.37	7164.46	1	1	1	1	1	1
43.65_1086.5264n	No	1	#6742	2	43.6457	1086.53	5.6973	SQQQQQPPF		B2BZD2	LMW-m glutenin subunit 0877L13-M OS=Triticum aestivum OX=4565 GN=Glu-D3 PE=4 SV=1	1.18687	Condition 2	Condition 1	0.009569	4.72778	2132.86	2294.11	2301.78	2565.48	2804.39	2616.31	2138.09	2320.98	2206.62	2565.48	2737.38	2507.72	1	0	0	1	1	1
60.29_1595.7570n	No	1	#4627	2	60.2886	1595.76	5.6698	GQWPQQQQVPQGTL	[2] Deamidation Q|[11] Deamidation Q	B2BZD2	LMW-m glutenin subunit 0877L13-M OS=Triticum aestivum OX=4565 GN=Glu-D3 PE=4 SV=1	1.3531	Condition 1	Condition 2	0.00168928	6.43022	3320.32	3147.21	3197.22	2226.61	2532.77	2383.29	3328.47	3184.07	3065.03	2226.61	2472.25	2284.38	0	1	1	0	0	0
31.47_933.5079n	No	1	#1490	2	31.4657	933.508	6.2321	QPHQIAQL		B2BZD2	LMW-m glutenin subunit 0877L13-M OS=Triticum aestivum OX=4565 GN=Glu-D3 PE=4 SV=1	1.1173	Condition 1	Condition 2	0.016643	4.18749	4152.71	4487.04	4447.46	3805.14	3927.09	3980.99	4162.89	4539.59	4263.59	3805.14	3833.25	3815.76	1	1	1	1	1	1
60.41_1620.8255n	No	1	#2953	2	60.4086	1620.83	7.2832	SQQQQPVLPQQPPF		B2BZD2	LMW-m glutenin subunit 0877L13-M OS=Triticum aestivum OX=4565 GN=Glu-D3 PE=4 SV=1	1.77886	Condition 1	Condition 2	0.000468958	9.53059	4940.46	4887.83	4732.42	2596.23	3028.06	2561.13	4952.58	4945.08	4536.77	2596.23	2955.7	2454.84	1	1	1	1	1	1
43.84_830.3959n	No	2	#2756,#1611	1,2	43.8428	830.396	7.5811	SQQQPPF		B2BZD2	LMW-m glutenin subunit 0877L13-M OS=Triticum aestivum OX=4565 GN=Glu-D3 PE=4 SV=1	1.25905	Condition 1	Condition 2	0.00123527	4.28668	9560.7	10317.9	10296.7	7785.57	8063.56	8117.66	9584.14	10438.7	9870.99	7785.57	7870.86	7780.75	2	2	0	2	2	2
43.79_958.4549n	No	2	#4611,#1021	1,2	43.7914	958.455	7.6329	SQQQQPPF		B2BZD2	LMW-m glutenin subunit 0877L13-M OS=Triticum aestivum OX=4565 GN=Glu-D3 PE=4 SV=1	1.19987	Condition 1	Condition 2	0.00159236	3.04223	13729	14271.7	14502.2	11465.5	11775.7	12181.8	13762.6	14438.9	13902.7	11465.5	11494.3	11676.2	1	2	2	2	2	2
46.26_1593.7920n	No	1	#1037	2	46.2559	1593.79	5.281	GQWPQQQQVPQGTL		B2BZD2	LMW-m glutenin subunit 0877L13-M OS=Triticum aestivum OX=4565 GN=Glu-D3 PE=4 SV=1	1.14091	Condition 1	Condition 2	0.00628391	3.73898	30617.6	28934.7	28554.1	26355.7	25668.4	25200.3	30692.6	29273.6	27373.6	26355.7	25055	24154.4	0	0	0	1	1	1
57.57_1770.8347n	No	2	#382,#20959	2,3	57.5747	1770.83	7.9101	SQQQQPPFSQQQPPF		B2BZD2	LMW-m glutenin subunit 0877L13-M OS=Triticum aestivum OX=4565 GN=Glu-D3 PE=4 SV=1	1.3931	Condition 1	Condition 2	0.000332537	4.30084	41774.2	39762.2	38354.4	28826.3	27885.7	29348.5	41876.7	40227.9	36768.7	28826.3	27219.3	28130.4	2	2	2	2	1	1
42.76_2778.3114n	No	1	#5862	3	42.7606	2778.31	6.8719	GQCVSQPQQQSQQQLGQQPQQQQL	[3] Carbamidomethyl C	B2LS34	Low molecular weight glutenin subunit OS=Triticum aestivum OX=4565 GN=LMW-m1 PE=4 SV=1	126.956	Condition 2	Condition 1	0.0163512	88.1445	48.2818	0	38.7569	3599.46	3932.7	3517.89	48.4002	0	37.1545	3599.46	3838.72	3371.88	0	0	0	1	1	1
53.83_1561.7542n	No	1	#20372	2	53.8323	1561.75	6.0516	SQQQQLFPQQPSF		B2LS34	Low molecular weight glutenin subunit OS=Triticum aestivum OX=4565 GN=LMW-m1 PE=4 SV=1	4.28283	Condition 2	Condition 1	0.00716947	42.4093	27.6859	70.3315	54.442	247.214	173.029	232.713	27.7538	71.1552	52.1912	247.214	168.895	223.055	0	1	1	1	0	0
61.48_1053.5259n	No	1	#21550	2	61.4816	1053.53	5.4752	GQQPQQQQL		B2LS34	Low molecular weight glutenin subunit OS=Triticum aestivum OX=4565 GN=LMW-m1 PE=4 SV=1	2.42881	Condition 1	Condition 2	0.27571	98.8343	45.1982	101.877	118.485	0	72.0265	37.3112	45.3091	103.071	113.587	0	70.3053	35.7626	1	1	0	0	0	0
32.42_1053.5224n	No	1	#10237	2	32.4194	1053.52	6.624	GQQPQQQQL		B2LS34	Low molecular weight glutenin subunit OS=Triticum aestivum OX=4565 GN=LMW-m1 PE=4 SV=1	14.4311	Condition 2	Condition 1	0.000314265	43.2947	134.387	115.008	247.852	2413.93	2439.62	2322.28	134.716	116.355	237.605	2413.93	2381.32	2225.89	0	0	0	1	1	1
36.83_1742.8022n	No	1	#3735	2	36.833	1742.8	7.6797	GQCVSQPQQQSQQQL	[3] Carbamidomethyl C	B2LS34	Low molecular weight glutenin subunit OS=Triticum aestivum OX=4565 GN=LMW-m1 PE=4 SV=1	10.485	Condition 2	Condition 1	4.94e-06	10.9553	419.589	336.707	386.867	3966.28	3801.61	4218.22	420.618	340.65	370.873	3966.28	3710.76	4043.15	0	0	0	1	1	1
37.23_849.3933n	No	1	#8404	2	37.2273	849.393	5.217	FPQQPSF		B2LS34	Low molecular weight glutenin subunit OS=Triticum aestivum OX=4565 GN=LMW-m1 PE=4 SV=1	1.17374	Condition 2	Condition 1	0.442196	25.6907	344.586	357.231	362.695	298.551	507.346	443.559	345.431	361.415	347.7	298.551	495.222	425.15	0	1	1	0	0	0
60.51_2733.3887n	No	1	#14120	3	60.5115	2733.39	5.4726	QQQPLPPQQTFPQQPLFSQQQQL		B2LS34	Low molecular weight glutenin subunit OS=Triticum aestivum OX=4565 GN=LMW-m1 PE=4 SV=1	1.01999	Condition 2	Condition 1	0.88279	14.213	620.354	496.983	550.923	597.382	475.849	628.372	621.876	502.803	528.146	597.382	464.477	602.292	1	0	0	1	0	1
42.17_704.3688n	No	1	#5619	1	42.1666	704.369	5.0954	ARSQML		B2LS34	Low molecular weight glutenin subunit OS=Triticum aestivum OX=4565 GN=LMW-m1 PE=4 SV=1	1.24367	Condition 2	Condition 1	0.00390763	5.25972	538.652	505.579	507.467	619.305	681.971	628.527	539.973	511.501	486.487	619.305	665.674	602.441	0	0	0	1	1	0
44.01_743.3620n	No	1	#7023	2	44.0057	743.362	6.9742	QQQPPF		B2LS34	Low molecular weight glutenin subunit OS=Triticum aestivum OX=4565 GN=LMW-m1 PE=4 SV=1	1.19507	Condition 1	Condition 2	0.0426256	9.46627	928.685	1094.36	1104.42	900.78	840.345	875.838	930.963	1107.18	1058.76	900.78	820.263	839.488	1	1	1	1	1	1
46.86_907.4772n	No	2	#7473,#2666	1,2	46.8581	907.477	6.7251	RTTTSVPF		B2LS34	Low molecular weight glutenin subunit OS=Triticum aestivum OX=4565 GN=LMW-m1 PE=4 SV=1	2.87302	Condition 2	Condition 1	1.14e-05	5.20525	1285.98	1361.45	1227.34	3623.85	3607.56	3900.87	1289.13	1377.39	1176.59	3623.85	3521.35	3738.97	1	0	2	2	2	0
48.30_1046.5927n	No	1	#1587	2	48.3004	1046.59	7.525	LQPHQIAQL		B2LS34	Low molecular weight glutenin subunit OS=Triticum aestivum OX=4565 GN=LMW-m1 PE=4 SV=1	4.13715	Condition 2	Condition 1	1.32e-05	8.55766	1833.09	1891.29	2001.53	8675.71	7538.52	7474.68	1837.58	1913.44	1918.78	8675.71	7358.37	7164.46	1	1	1	1	1	1
56.12_1086.5364n	No	1	#2114	2	56.1157	1086.54	6.7688	YRTTTSVPF	[8] Hydroxyproline	B2LS34	Low molecular weight glutenin subunit OS=Triticum aestivum OX=4565 GN=LMW-m1 PE=4 SV=1	1.09696	Condition 1	Condition 2	0.0215106	4.25025	3654.63	3530.08	3357.23	3183.71	3192.8	3233.67	3663.6	3571.42	3218.43	3183.71	3116.5	3099.47	0	0	1	0	1	0
31.47_933.5079n	No	1	#1490	2	31.4657	933.508	6.2321	QPHQIAQL		B2LS34	Low molecular weight glutenin subunit OS=Triticum aestivum OX=4565 GN=LMW-m1 PE=4 SV=1	1.1173	Condition 1	Condition 2	0.016643	4.18749	4152.71	4487.04	4447.46	3805.14	3927.09	3980.99	4162.89	4539.59	4263.59	3805.14	3833.25	3815.76	1	1	1	1	1	1
42.10_1874.9409n	No	2	#8840,#3445	2,3	42.098	1874.94	6.0283	QQQPLPPQQTFPQQPL	[14] Deamidation Q	B2LS34	Low molecular weight glutenin subunit OS=Triticum aestivum OX=4565 GN=LMW-m1 PE=4 SV=1	1.30356	Condition 2	Condition 1	0.000457195	4.18768	5139.22	5411.78	4983.36	6837.7	6748.52	6663.71	5151.83	5475.16	4777.33	6837.7	6587.25	6387.14	0	0	2	2	0	0
57.51_924.5072n	No	2	#9808,#1845	1,2	57.5061	924.507	6.6076	VLPQQPPF		B2LS34	Low molecular weight glutenin subunit OS=Triticum aestivum OX=4565 GN=LMW-m1 PE=4 SV=1	1.52346	Condition 1	Condition 2	0.000117489	3.78454	7392.9	7517.23	6988.84	4674.36	4743.86	4956.29	7411.02	7605.27	6699.9	4674.36	4630.49	4750.59	2	2	2	2	2	2
67.56_1447.8426n	No	1	#1011	2	67.5586	1447.84	7.8316	VQQQIPVVQPSIL		B2LS34	Low molecular weight glutenin subunit OS=Triticum aestivum OX=4565 GN=LMW-m1 PE=4 SV=1	1.0219	Condition 2	Condition 1	0.471495	4.23413	9613.62	9645.8	9317.9	10184.5	9643.11	9375.48	9637.19	9758.77	8932.67	10184.5	9412.67	8986.36	1	1	1	1	1	1
43.84_830.3959n	No	2	#2756,#1611	1,2	43.8428	830.396	7.5811	SQQQPPF		B2LS34	Low molecular weight glutenin subunit OS=Triticum aestivum OX=4565 GN=LMW-m1 PE=4 SV=1	1.25905	Condition 1	Condition 2	0.00123527	4.28668	9560.7	10317.9	10296.7	7785.57	8063.56	8117.66	9584.14	10438.7	9870.99	7785.57	7870.86	7780.75	2	2	0	2	2	2
58.54_1873.9670n	No	1	#4253	2	58.5367	1873.97	6.2025	QQQPLPPQQTFPQQPL		B2LS34	Low molecular weight glutenin subunit OS=Triticum aestivum OX=4565 GN=LMW-m1 PE=4 SV=1	1.19639	Condition 1	Condition 2	0.0248533	8.79797	19124.6	16944.9	16169.9	14632.3	14680.1	14351.7	19171.5	17143.3	15501.3	14632.3	14329.3	13756.1	1	1	1	1	0	1
46.02_2359.1468n	No	1	#2080	3	46.0158	2359.15	6.4457	LQQQCSPVAMPQRLARSQML	[5] Carbamidomethyl C|[10] Oxidation M|[12] Deamidation Q|[18] Deamidation Q	B2LS34	Low molecular weight glutenin subunit OS=Triticum aestivum OX=4565 GN=LMW-m1 PE=4 SV=1	1.04025	Condition 2	Condition 1	0.0942674	2.84545	18839.4	18064.6	19081	19455	19641.3	19142.2	18885.6	18276.2	18292.1	19455	19172	18347.7	0	0	0	1	1	0
42.76_2778.3114n	No	1	#5862	3	42.7606	2778.31	6.8719	GQCVSQPQQQSQQQLGQQPQQQQL	[3] Carbamidomethyl C	B2Y2Q1	Low molecular weight glutenin subunit OS=Triticum aestivum OX=4565 GN=GluB3-1 PE=4 SV=1	126.956	Condition 2	Condition 1	0.0163512	88.1445	48.2818	0	38.7569	3599.46	3932.7	3517.89	48.4002	0	37.1545	3599.46	3838.72	3371.88	0	0	0	1	1	1
61.48_1053.5259n	No	1	#21550	2	61.4816	1053.53	5.4752	GQQPQQQQL		B2Y2Q1	Low molecular weight glutenin subunit OS=Triticum aestivum OX=4565 GN=GluB3-1 PE=4 SV=1	2.42881	Condition 1	Condition 2	0.27571	98.8343	45.1982	101.877	118.485	0	72.0265	37.3112	45.3091	103.071	113.587	0	70.3053	35.7626	1	1	0	0	0	0
32.42_1053.5224n	No	1	#10237	2	32.4194	1053.52	6.624	GQQPQQQQL		B2Y2Q1	Low molecular weight glutenin subunit OS=Triticum aestivum OX=4565 GN=GluB3-1 PE=4 SV=1	14.4311	Condition 2	Condition 1	0.000314265	43.2947	134.387	115.008	247.852	2413.93	2439.62	2322.28	134.716	116.355	237.605	2413.93	2381.32	2225.89	0	0	0	1	1	1
36.83_1742.8022n	No	1	#3735	2	36.833	1742.8	7.6797	GQCVSQPQQQSQQQL	[3] Carbamidomethyl C	B2Y2Q1	Low molecular weight glutenin subunit OS=Triticum aestivum OX=4565 GN=GluB3-1 PE=4 SV=1	10.485	Condition 2	Condition 1	4.94e-06	10.9553	419.589	336.707	386.867	3966.28	3801.61	4218.22	420.618	340.65	370.873	3966.28	3710.76	4043.15	0	0	0	1	1	1
42.17_704.3688n	No	1	#5619	1	42.1666	704.369	5.0954	ARSQML		B2Y2Q1	Low molecular weight glutenin subunit OS=Triticum aestivum OX=4565 GN=GluB3-1 PE=4 SV=1	1.24367	Condition 2	Condition 1	0.00390763	5.25972	538.652	505.579	507.467	619.305	681.971	628.527	539.973	511.501	486.487	619.305	665.674	602.441	0	0	0	1	1	0
46.86_907.4772n	No	2	#7473,#2666	1,2	46.8581	907.477	6.7251	RTTTSVPF		B2Y2Q1	Low molecular weight glutenin subunit OS=Triticum aestivum OX=4565 GN=GluB3-1 PE=4 SV=1	2.87302	Condition 2	Condition 1	1.14e-05	5.20525	1285.98	1361.45	1227.34	3623.85	3607.56	3900.87	1289.13	1377.39	1176.59	3623.85	3521.35	3738.97	1	0	2	2	2	0
51.98_1132.5769n	No	1	#1421	2	51.9766	1132.58	7.6263	QQLNPCKVF	[6] Carbamidomethyl C	B2Y2Q1	Low molecular weight glutenin subunit OS=Triticum aestivum OX=4565 GN=GluB3-1 PE=4 SV=1	10.3262	Condition 2	Condition 1	3.54e-07	5.23417	1533.53	1701.68	1639.93	17179.3	16122.3	17040	1537.29	1721.61	1572.13	17179.3	15737.1	16332.7	1	1	1	1	1	1
48.30_1046.5927n	No	1	#1587	2	48.3004	1046.59	7.525	LQPHQIAQL		B2Y2Q1	Low molecular weight glutenin subunit OS=Triticum aestivum OX=4565 GN=GluB3-1 PE=4 SV=1	4.13715	Condition 2	Condition 1	1.32e-05	8.55766	1833.09	1891.29	2001.53	8675.71	7538.52	7474.68	1837.58	1913.44	1918.78	8675.71	7358.37	7164.46	1	1	1	1	1	1
56.08_1898.8836n	No	1	#7197	2	56.0815	1898.88	6.9183	SQQQQPPFSQQQQPPF		B2Y2Q1	Low molecular weight glutenin subunit OS=Triticum aestivum OX=4565 GN=GluB3-1 PE=4 SV=1	1.35294	Condition 1	Condition 2	7.39e-05	2.9623	2041.16	2023.78	2003.68	1508.95	1445.63	1530.93	2046.16	2047.49	1920.84	1508.95	1411.08	1467.39	1	1	1	1	0	1
56.12_1086.5364n	No	1	#2114	2	56.1157	1086.54	6.7688	YRTTTSVPF	[8] Hydroxyproline	B2Y2Q1	Low molecular weight glutenin subunit OS=Triticum aestivum OX=4565 GN=GluB3-1 PE=4 SV=1	1.09696	Condition 1	Condition 2	0.0215106	4.25025	3654.63	3530.08	3357.23	3183.71	3192.8	3233.67	3663.6	3571.42	3218.43	3183.71	3116.5	3099.47	0	0	1	0	1	0
31.47_933.5079n	No	1	#1490	2	31.4657	933.508	6.2321	QPHQIAQL		B2Y2Q1	Low molecular weight glutenin subunit OS=Triticum aestivum OX=4565 GN=GluB3-1 PE=4 SV=1	1.1173	Condition 1	Condition 2	0.016643	4.18749	4152.71	4487.04	4447.46	3805.14	3927.09	3980.99	4162.89	4539.59	4263.59	3805.14	3833.25	3815.76	1	1	1	1	1	1
60.41_1620.8255n	No	1	#2953	2	60.4086	1620.83	7.2832	SQQQQPVLPQQPPF		B2Y2Q1	Low molecular weight glutenin subunit OS=Triticum aestivum OX=4565 GN=GluB3-1 PE=4 SV=1	1.77886	Condition 1	Condition 2	0.000468958	9.53059	4940.46	4887.83	4732.42	2596.23	3028.06	2561.13	4952.58	4945.08	4536.77	2596.23	2955.7	2454.84	1	1	1	1	1	1
45.96_664.3942n	No	2	#563,#2312	1,2	45.9558	664.394	7.5806	VHPSIL		B2Y2Q1	Low molecular weight glutenin subunit OS=Triticum aestivum OX=4565 GN=GluB3-1 PE=4 SV=1	1.94431	Condition 2	Condition 1	1.56e-06	2.27569	5811.99	6082.51	5959.01	11483.4	11490.2	11739.1	5826.24	6153.75	5712.65	11483.4	11215.6	11251.9	2	1	2	0	0	2
43.84_830.3959n	No	2	#2756,#1611	1,2	43.8428	830.396	7.5811	SQQQPPF		B2Y2Q1	Low molecular weight glutenin subunit OS=Triticum aestivum OX=4565 GN=GluB3-1 PE=4 SV=1	1.25905	Condition 1	Condition 2	0.00123527	4.28668	9560.7	10317.9	10296.7	7785.57	8063.56	8117.66	9584.14	10438.7	9870.99	7785.57	7870.86	7780.75	2	2	0	2	2	2
43.79_958.4549n	No	2	#4611,#1021	1,2	43.7914	958.455	7.6329	SQQQQPPF		B2Y2Q1	Low molecular weight glutenin subunit OS=Triticum aestivum OX=4565 GN=GluB3-1 PE=4 SV=1	1.19987	Condition 1	Condition 2	0.00159236	3.04223	13729	14271.7	14502.2	11465.5	11775.7	12181.8	13762.6	14438.9	13902.7	11465.5	11494.3	11676.2	1	2	2	2	2	2
51.47_943.4805n	No	2	#1283,#808	1,2	51.4688	943.481	6.478	SQQQLPPF		B2Y2Q1	Low molecular weight glutenin subunit OS=Triticum aestivum OX=4565 GN=GluB3-1 PE=4 SV=1	1.20854	Condition 2	Condition 1	0.000926353	3.04754	18684	18177.3	17579.2	21856.4	21498.8	22438.5	18729.8	18390.2	16852.4	21856.4	20985.1	21507.3	2	0	2	2	0	0
63.56_1068.6023n	No	2	#8706,#585	1,2	63.5589	1068.6	7.2661	VLPQQQIPF		B2Y2Q1	Low molecular weight glutenin subunit OS=Triticum aestivum OX=4565 GN=GluB3-1 PE=4 SV=1	1.3501	Condition 2	Condition 1	0.00106318	4.482	17988.9	18195.7	16734.7	23057.9	23448.3	24940.3	18033	18408.9	16042.8	23057.9	22887.9	23905.2	1	2	2	2	2	2
57.57_1770.8347n	No	2	#382,#20959	2,3	57.5747	1770.83	7.9101	SQQQQPPFSQQQPPF		B2Y2Q1	Low molecular weight glutenin subunit OS=Triticum aestivum OX=4565 GN=GluB3-1 PE=4 SV=1	1.3931	Condition 1	Condition 2	0.000332537	4.30084	41774.2	39762.2	38354.4	28826.3	27885.7	29348.5	41876.7	40227.9	36768.7	28826.3	27219.3	28130.4	2	2	2	2	1	1
42.76_2778.3114n	No	1	#5862	3	42.7606	2778.31	6.8719	GQCVSQPQQQSQQQLGQQPQQQQL	[3] Carbamidomethyl C	B2Y2Q2	Low molecular weight glutenin subunit OS=Triticum aestivum OX=4565 GN=GluB3-1 PE=4 SV=1	126.956	Condition 2	Condition 1	0.0163512	88.1445	48.2818	0	38.7569	3599.46	3932.7	3517.89	48.4002	0	37.1545	3599.46	3838.72	3371.88	0	0	0	1	1	1
61.48_1053.5259n	No	1	#21550	2	61.4816	1053.53	5.4752	GQQPQQQQL		B2Y2Q2	Low molecular weight glutenin subunit OS=Triticum aestivum OX=4565 GN=GluB3-1 PE=4 SV=1	2.42881	Condition 1	Condition 2	0.27571	98.8343	45.1982	101.877	118.485	0	72.0265	37.3112	45.3091	103.071	113.587	0	70.3053	35.7626	1	1	0	0	0	0
32.42_1053.5224n	No	1	#10237	2	32.4194	1053.52	6.624	GQQPQQQQL		B2Y2Q2	Low molecular weight glutenin subunit OS=Triticum aestivum OX=4565 GN=GluB3-1 PE=4 SV=1	14.4311	Condition 2	Condition 1	0.000314265	43.2947	134.387	115.008	247.852	2413.93	2439.62	2322.28	134.716	116.355	237.605	2413.93	2381.32	2225.89	0	0	0	1	1	1
36.83_1742.8022n	No	1	#3735	2	36.833	1742.8	7.6797	GQCVSQPQQQSQQQL	[3] Carbamidomethyl C	B2Y2Q2	Low molecular weight glutenin subunit OS=Triticum aestivum OX=4565 GN=GluB3-1 PE=4 SV=1	10.485	Condition 2	Condition 1	4.94e-06	10.9553	419.589	336.707	386.867	3966.28	3801.61	4218.22	420.618	340.65	370.873	3966.28	3710.76	4043.15	0	0	0	1	1	1
42.17_704.3688n	No	1	#5619	1	42.1666	704.369	5.0954	ARSQML		B2Y2Q2	Low molecular weight glutenin subunit OS=Triticum aestivum OX=4565 GN=GluB3-1 PE=4 SV=1	1.24367	Condition 2	Condition 1	0.00390763	5.25972	538.652	505.579	507.467	619.305	681.971	628.527	539.973	511.501	486.487	619.305	665.674	602.441	0	0	0	1	1	0
46.86_907.4772n	No	2	#7473,#2666	1,2	46.8581	907.477	6.7251	RTTTSVPF		B2Y2Q2	Low molecular weight glutenin subunit OS=Triticum aestivum OX=4565 GN=GluB3-1 PE=4 SV=1	2.87302	Condition 2	Condition 1	1.14e-05	5.20525	1285.98	1361.45	1227.34	3623.85	3607.56	3900.87	1289.13	1377.39	1176.59	3623.85	3521.35	3738.97	1	0	2	2	2	0
51.98_1132.5769n	No	1	#1421	2	51.9766	1132.58	7.6263	QQLNPCKVF	[6] Carbamidomethyl C	B2Y2Q2	Low molecular weight glutenin subunit OS=Triticum aestivum OX=4565 GN=GluB3-1 PE=4 SV=1	10.3262	Condition 2	Condition 1	3.54e-07	5.23417	1533.53	1701.68	1639.93	17179.3	16122.3	17040	1537.29	1721.61	1572.13	17179.3	15737.1	16332.7	1	1	1	1	1	1
48.30_1046.5927n	No	1	#1587	2	48.3004	1046.59	7.525	LQPHQIAQL		B2Y2Q2	Low molecular weight glutenin subunit OS=Triticum aestivum OX=4565 GN=GluB3-1 PE=4 SV=1	4.13715	Condition 2	Condition 1	1.32e-05	8.55766	1833.09	1891.29	2001.53	8675.71	7538.52	7474.68	1837.58	1913.44	1918.78	8675.71	7358.37	7164.46	1	1	1	1	1	1
56.08_1898.8836n	No	1	#7197	2	56.0815	1898.88	6.9183	SQQQQPPFSQQQQPPF		B2Y2Q2	Low molecular weight glutenin subunit OS=Triticum aestivum OX=4565 GN=GluB3-1 PE=4 SV=1	1.35294	Condition 1	Condition 2	7.39e-05	2.9623	2041.16	2023.78	2003.68	1508.95	1445.63	1530.93	2046.16	2047.49	1920.84	1508.95	1411.08	1467.39	1	1	1	1	0	1
56.12_1086.5364n	No	1	#2114	2	56.1157	1086.54	6.7688	YRTTTSVPF	[8] Hydroxyproline	B2Y2Q2	Low molecular weight glutenin subunit OS=Triticum aestivum OX=4565 GN=GluB3-1 PE=4 SV=1	1.09696	Condition 1	Condition 2	0.0215106	4.25025	3654.63	3530.08	3357.23	3183.71	3192.8	3233.67	3663.6	3571.42	3218.43	3183.71	3116.5	3099.47	0	0	1	0	1	0
31.47_933.5079n	No	1	#1490	2	31.4657	933.508	6.2321	QPHQIAQL		B2Y2Q2	Low molecular weight glutenin subunit OS=Triticum aestivum OX=4565 GN=GluB3-1 PE=4 SV=1	1.1173	Condition 1	Condition 2	0.016643	4.18749	4152.71	4487.04	4447.46	3805.14	3927.09	3980.99	4162.89	4539.59	4263.59	3805.14	3833.25	3815.76	1	1	1	1	1	1
60.41_1620.8255n	No	1	#2953	2	60.4086	1620.83	7.2832	SQQQQPVLPQQPPF		B2Y2Q2	Low molecular weight glutenin subunit OS=Triticum aestivum OX=4565 GN=GluB3-1 PE=4 SV=1	1.77886	Condition 1	Condition 2	0.000468958	9.53059	4940.46	4887.83	4732.42	2596.23	3028.06	2561.13	4952.58	4945.08	4536.77	2596.23	2955.7	2454.84	1	1	1	1	1	1
45.96_664.3942n	No	2	#563,#2312	1,2	45.9558	664.394	7.5806	VHPSIL		B2Y2Q2	Low molecular weight glutenin subunit OS=Triticum aestivum OX=4565 GN=GluB3-1 PE=4 SV=1	1.94431	Condition 2	Condition 1	1.56e-06	2.27569	5811.99	6082.51	5959.01	11483.4	11490.2	11739.1	5826.24	6153.75	5712.65	11483.4	11215.6	11251.9	2	1	2	0	0	2
43.84_830.3959n	No	2	#2756,#1611	1,2	43.8428	830.396	7.5811	SQQQPPF		B2Y2Q2	Low molecular weight glutenin subunit OS=Triticum aestivum OX=4565 GN=GluB3-1 PE=4 SV=1	1.25905	Condition 1	Condition 2	0.00123527	4.28668	9560.7	10317.9	10296.7	7785.57	8063.56	8117.66	9584.14	10438.7	9870.99	7785.57	7870.86	7780.75	2	2	0	2	2	2
43.79_958.4549n	No	2	#4611,#1021	1,2	43.7914	958.455	7.6329	SQQQQPPF		B2Y2Q2	Low molecular weight glutenin subunit OS=Triticum aestivum OX=4565 GN=GluB3-1 PE=4 SV=1	1.19987	Condition 1	Condition 2	0.00159236	3.04223	13729	14271.7	14502.2	11465.5	11775.7	12181.8	13762.6	14438.9	13902.7	11465.5	11494.3	11676.2	1	2	2	2	2	2
51.47_943.4805n	No	2	#1283,#808	1,2	51.4688	943.481	6.478	SQQQLPPF		B2Y2Q2	Low molecular weight glutenin subunit OS=Triticum aestivum OX=4565 GN=GluB3-1 PE=4 SV=1	1.20854	Condition 2	Condition 1	0.000926353	3.04754	18684	18177.3	17579.2	21856.4	21498.8	22438.5	18729.8	18390.2	16852.4	21856.4	20985.1	21507.3	2	0	2	2	0	0
63.56_1068.6023n	No	2	#8706,#585	1,2	63.5589	1068.6	7.2661	VLPQQQIPF		B2Y2Q2	Low molecular weight glutenin subunit OS=Triticum aestivum OX=4565 GN=GluB3-1 PE=4 SV=1	1.3501	Condition 2	Condition 1	0.00106318	4.482	17988.9	18195.7	16734.7	23057.9	23448.3	24940.3	18033	18408.9	16042.8	23057.9	22887.9	23905.2	1	2	2	2	2	2
57.57_1770.8347n	No	2	#382,#20959	2,3	57.5747	1770.83	7.9101	SQQQQPPFSQQQPPF		B2Y2Q2	Low molecular weight glutenin subunit OS=Triticum aestivum OX=4565 GN=GluB3-1 PE=4 SV=1	1.3931	Condition 1	Condition 2	0.000332537	4.30084	41774.2	39762.2	38354.4	28826.3	27885.7	29348.5	41876.7	40227.9	36768.7	28826.3	27219.3	28130.4	2	2	2	2	1	1
42.76_2778.3114n	No	1	#5862	3	42.7606	2778.31	6.8719	GQCVSQPQQQSQQQLGQQPQQQQL	[3] Carbamidomethyl C	B2Y2Q3	Low molecular weight glutenin subunit OS=Triticum aestivum OX=4565 GN=GluB3-1 PE=4 SV=1	126.956	Condition 2	Condition 1	0.0163512	88.1445	48.2818	0	38.7569	3599.46	3932.7	3517.89	48.4002	0	37.1545	3599.46	3838.72	3371.88	0	0	0	1	1	1
61.48_1053.5259n	No	1	#21550	2	61.4816	1053.53	5.4752	GQQPQQQQL		B2Y2Q3	Low molecular weight glutenin subunit OS=Triticum aestivum OX=4565 GN=GluB3-1 PE=4 SV=1	2.42881	Condition 1	Condition 2	0.27571	98.8343	45.1982	101.877	118.485	0	72.0265	37.3112	45.3091	103.071	113.587	0	70.3053	35.7626	1	1	0	0	0	0
32.42_1053.5224n	No	1	#10237	2	32.4194	1053.52	6.624	GQQPQQQQL		B2Y2Q3	Low molecular weight glutenin subunit OS=Triticum aestivum OX=4565 GN=GluB3-1 PE=4 SV=1	14.4311	Condition 2	Condition 1	0.000314265	43.2947	134.387	115.008	247.852	2413.93	2439.62	2322.28	134.716	116.355	237.605	2413.93	2381.32	2225.89	0	0	0	1	1	1
36.83_1742.8022n	No	1	#3735	2	36.833	1742.8	7.6797	GQCVSQPQQQSQQQL	[3] Carbamidomethyl C	B2Y2Q3	Low molecular weight glutenin subunit OS=Triticum aestivum OX=4565 GN=GluB3-1 PE=4 SV=1	10.485	Condition 2	Condition 1	4.94e-06	10.9553	419.589	336.707	386.867	3966.28	3801.61	4218.22	420.618	340.65	370.873	3966.28	3710.76	4043.15	0	0	0	1	1	1
42.17_704.3688n	No	1	#5619	1	42.1666	704.369	5.0954	ARSQML		B2Y2Q3	Low molecular weight glutenin subunit OS=Triticum aestivum OX=4565 GN=GluB3-1 PE=4 SV=1	1.24367	Condition 2	Condition 1	0.00390763	5.25972	538.652	505.579	507.467	619.305	681.971	628.527	539.973	511.501	486.487	619.305	665.674	602.441	0	0	0	1	1	0
46.86_907.4772n	No	2	#7473,#2666	1,2	46.8581	907.477	6.7251	RTTTSVPF		B2Y2Q3	Low molecular weight glutenin subunit OS=Triticum aestivum OX=4565 GN=GluB3-1 PE=4 SV=1	2.87302	Condition 2	Condition 1	1.14e-05	5.20525	1285.98	1361.45	1227.34	3623.85	3607.56	3900.87	1289.13	1377.39	1176.59	3623.85	3521.35	3738.97	1	0	2	2	2	0
51.98_1132.5769n	No	1	#1421	2	51.9766	1132.58	7.6263	QQLNPCKVF	[6] Carbamidomethyl C	B2Y2Q3	Low molecular weight glutenin subunit OS=Triticum aestivum OX=4565 GN=GluB3-1 PE=4 SV=1	10.3262	Condition 2	Condition 1	3.54e-07	5.23417	1533.53	1701.68	1639.93	17179.3	16122.3	17040	1537.29	1721.61	1572.13	17179.3	15737.1	16332.7	1	1	1	1	1	1
48.30_1046.5927n	No	1	#1587	2	48.3004	1046.59	7.525	LQPHQIAQL		B2Y2Q3	Low molecular weight glutenin subunit OS=Triticum aestivum OX=4565 GN=GluB3-1 PE=4 SV=1	4.13715	Condition 2	Condition 1	1.32e-05	8.55766	1833.09	1891.29	2001.53	8675.71	7538.52	7474.68	1837.58	1913.44	1918.78	8675.71	7358.37	7164.46	1	1	1	1	1	1
56.08_1898.8836n	No	1	#7197	2	56.0815	1898.88	6.9183	SQQQQPPFSQQQQPPF		B2Y2Q3	Low molecular weight glutenin subunit OS=Triticum aestivum OX=4565 GN=GluB3-1 PE=4 SV=1	1.35294	Condition 1	Condition 2	7.39e-05	2.9623	2041.16	2023.78	2003.68	1508.95	1445.63	1530.93	2046.16	2047.49	1920.84	1508.95	1411.08	1467.39	1	1	1	1	0	1
56.12_1086.5364n	No	1	#2114	2	56.1157	1086.54	6.7688	YRTTTSVPF	[8] Hydroxyproline	B2Y2Q3	Low molecular weight glutenin subunit OS=Triticum aestivum OX=4565 GN=GluB3-1 PE=4 SV=1	1.09696	Condition 1	Condition 2	0.0215106	4.25025	3654.63	3530.08	3357.23	3183.71	3192.8	3233.67	3663.6	3571.42	3218.43	3183.71	3116.5	3099.47	0	0	1	0	1	0
31.47_933.5079n	No	1	#1490	2	31.4657	933.508	6.2321	QPHQIAQL		B2Y2Q3	Low molecular weight glutenin subunit OS=Triticum aestivum OX=4565 GN=GluB3-1 PE=4 SV=1	1.1173	Condition 1	Condition 2	0.016643	4.18749	4152.71	4487.04	4447.46	3805.14	3927.09	3980.99	4162.89	4539.59	4263.59	3805.14	3833.25	3815.76	1	1	1	1	1	1
60.41_1620.8255n	No	1	#2953	2	60.4086	1620.83	7.2832	SQQQQPVLPQQPPF		B2Y2Q3	Low molecular weight glutenin subunit OS=Triticum aestivum OX=4565 GN=GluB3-1 PE=4 SV=1	1.77886	Condition 1	Condition 2	0.000468958	9.53059	4940.46	4887.83	4732.42	2596.23	3028.06	2561.13	4952.58	4945.08	4536.77	2596.23	2955.7	2454.84	1	1	1	1	1	1
45.96_664.3942n	No	2	#563,#2312	1,2	45.9558	664.394	7.5806	VHPSIL		B2Y2Q3	Low molecular weight glutenin subunit OS=Triticum aestivum OX=4565 GN=GluB3-1 PE=4 SV=1	1.94431	Condition 2	Condition 1	1.56e-06	2.27569	5811.99	6082.51	5959.01	11483.4	11490.2	11739.1	5826.24	6153.75	5712.65	11483.4	11215.6	11251.9	2	1	2	0	0	2
43.84_830.3959n	No	2	#2756,#1611	1,2	43.8428	830.396	7.5811	SQQQPPF		B2Y2Q3	Low molecular weight glutenin subunit OS=Triticum aestivum OX=4565 GN=GluB3-1 PE=4 SV=1	1.25905	Condition 1	Condition 2	0.00123527	4.28668	9560.7	10317.9	10296.7	7785.57	8063.56	8117.66	9584.14	10438.7	9870.99	7785.57	7870.86	7780.75	2	2	0	2	2	2
43.79_958.4549n	No	2	#4611,#1021	1,2	43.7914	958.455	7.6329	SQQQQPPF		B2Y2Q3	Low molecular weight glutenin subunit OS=Triticum aestivum OX=4565 GN=GluB3-1 PE=4 SV=1	1.19987	Condition 1	Condition 2	0.00159236	3.04223	13729	14271.7	14502.2	11465.5	11775.7	12181.8	13762.6	14438.9	13902.7	11465.5	11494.3	11676.2	1	2	2	2	2	2
51.47_943.4805n	No	2	#1283,#808	1,2	51.4688	943.481	6.478	SQQQLPPF		B2Y2Q3	Low molecular weight glutenin subunit OS=Triticum aestivum OX=4565 GN=GluB3-1 PE=4 SV=1	1.20854	Condition 2	Condition 1	0.000926353	3.04754	18684	18177.3	17579.2	21856.4	21498.8	22438.5	18729.8	18390.2	16852.4	21856.4	20985.1	21507.3	2	0	2	2	0	0
63.56_1068.6023n	No	2	#8706,#585	1,2	63.5589	1068.6	7.2661	VLPQQQIPF		B2Y2Q3	Low molecular weight glutenin subunit OS=Triticum aestivum OX=4565 GN=GluB3-1 PE=4 SV=1	1.3501	Condition 2	Condition 1	0.00106318	4.482	17988.9	18195.7	16734.7	23057.9	23448.3	24940.3	18033	18408.9	16042.8	23057.9	22887.9	23905.2	1	2	2	2	2	2
57.57_1770.8347n	No	2	#382,#20959	2,3	57.5747	1770.83	7.9101	SQQQQPPFSQQQPPF		B2Y2Q3	Low molecular weight glutenin subunit OS=Triticum aestivum OX=4565 GN=GluB3-1 PE=4 SV=1	1.3931	Condition 1	Condition 2	0.000332537	4.30084	41774.2	39762.2	38354.4	28826.3	27885.7	29348.5	41876.7	40227.9	36768.7	28826.3	27219.3	28130.4	2	2	2	2	1	1
42.76_2778.3114n	No	1	#5862	3	42.7606	2778.31	6.8719	GQCVSQPQQQSQQQLGQQPQQQQL	[3] Carbamidomethyl C	B2Y2Q4	Low molecular weight glutenin subunit OS=Triticum aestivum OX=4565 GN=GluB3-1 PE=4 SV=1	126.956	Condition 2	Condition 1	0.0163512	88.1445	48.2818	0	38.7569	3599.46	3932.7	3517.89	48.4002	0	37.1545	3599.46	3838.72	3371.88	0	0	0	1	1	1
61.48_1053.5259n	No	1	#21550	2	61.4816	1053.53	5.4752	GQQPQQQQL		B2Y2Q4	Low molecular weight glutenin subunit OS=Triticum aestivum OX=4565 GN=GluB3-1 PE=4 SV=1	2.42881	Condition 1	Condition 2	0.27571	98.8343	45.1982	101.877	118.485	0	72.0265	37.3112	45.3091	103.071	113.587	0	70.3053	35.7626	1	1	0	0	0	0
32.42_1053.5224n	No	1	#10237	2	32.4194	1053.52	6.624	GQQPQQQQL		B2Y2Q4	Low molecular weight glutenin subunit OS=Triticum aestivum OX=4565 GN=GluB3-1 PE=4 SV=1	14.4311	Condition 2	Condition 1	0.000314265	43.2947	134.387	115.008	247.852	2413.93	2439.62	2322.28	134.716	116.355	237.605	2413.93	2381.32	2225.89	0	0	0	1	1	1
36.83_1742.8022n	No	1	#3735	2	36.833	1742.8	7.6797	GQCVSQPQQQSQQQL	[3] Carbamidomethyl C	B2Y2Q4	Low molecular weight glutenin subunit OS=Triticum aestivum OX=4565 GN=GluB3-1 PE=4 SV=1	10.485	Condition 2	Condition 1	4.94e-06	10.9553	419.589	336.707	386.867	3966.28	3801.61	4218.22	420.618	340.65	370.873	3966.28	3710.76	4043.15	0	0	0	1	1	1
42.17_704.3688n	No	1	#5619	1	42.1666	704.369	5.0954	ARSQML		B2Y2Q4	Low molecular weight glutenin subunit OS=Triticum aestivum OX=4565 GN=GluB3-1 PE=4 SV=1	1.24367	Condition 2	Condition 1	0.00390763	5.25972	538.652	505.579	507.467	619.305	681.971	628.527	539.973	511.501	486.487	619.305	665.674	602.441	0	0	0	1	1	0
46.86_907.4772n	No	2	#7473,#2666	1,2	46.8581	907.477	6.7251	RTTTSVPF		B2Y2Q4	Low molecular weight glutenin subunit OS=Triticum aestivum OX=4565 GN=GluB3-1 PE=4 SV=1	2.87302	Condition 2	Condition 1	1.14e-05	5.20525	1285.98	1361.45	1227.34	3623.85	3607.56	3900.87	1289.13	1377.39	1176.59	3623.85	3521.35	3738.97	1	0	2	2	2	0
51.98_1132.5769n	No	1	#1421	2	51.9766	1132.58	7.6263	QQLNPCKVF	[6] Carbamidomethyl C	B2Y2Q4	Low molecular weight glutenin subunit OS=Triticum aestivum OX=4565 GN=GluB3-1 PE=4 SV=1	10.3262	Condition 2	Condition 1	3.54e-07	5.23417	1533.53	1701.68	1639.93	17179.3	16122.3	17040	1537.29	1721.61	1572.13	17179.3	15737.1	16332.7	1	1	1	1	1	1
48.30_1046.5927n	No	1	#1587	2	48.3004	1046.59	7.525	LQPHQIAQL		B2Y2Q4	Low molecular weight glutenin subunit OS=Triticum aestivum OX=4565 GN=GluB3-1 PE=4 SV=1	4.13715	Condition 2	Condition 1	1.32e-05	8.55766	1833.09	1891.29	2001.53	8675.71	7538.52	7474.68	1837.58	1913.44	1918.78	8675.71	7358.37	7164.46	1	1	1	1	1	1
56.08_1898.8836n	No	1	#7197	2	56.0815	1898.88	6.9183	SQQQQPPFSQQQQPPF		B2Y2Q4	Low molecular weight glutenin subunit OS=Triticum aestivum OX=4565 GN=GluB3-1 PE=4 SV=1	1.35294	Condition 1	Condition 2	7.39e-05	2.9623	2041.16	2023.78	2003.68	1508.95	1445.63	1530.93	2046.16	2047.49	1920.84	1508.95	1411.08	1467.39	1	1	1	1	0	1
56.12_1086.5364n	No	1	#2114	2	56.1157	1086.54	6.7688	YRTTTSVPF	[8] Hydroxyproline	B2Y2Q4	Low molecular weight glutenin subunit OS=Triticum aestivum OX=4565 GN=GluB3-1 PE=4 SV=1	1.09696	Condition 1	Condition 2	0.0215106	4.25025	3654.63	3530.08	3357.23	3183.71	3192.8	3233.67	3663.6	3571.42	3218.43	3183.71	3116.5	3099.47	0	0	1	0	1	0
31.47_933.5079n	No	1	#1490	2	31.4657	933.508	6.2321	QPHQIAQL		B2Y2Q4	Low molecular weight glutenin subunit OS=Triticum aestivum OX=4565 GN=GluB3-1 PE=4 SV=1	1.1173	Condition 1	Condition 2	0.016643	4.18749	4152.71	4487.04	4447.46	3805.14	3927.09	3980.99	4162.89	4539.59	4263.59	3805.14	3833.25	3815.76	1	1	1	1	1	1
60.41_1620.8255n	No	1	#2953	2	60.4086	1620.83	7.2832	SQQQQPVLPQQPPF		B2Y2Q4	Low molecular weight glutenin subunit OS=Triticum aestivum OX=4565 GN=GluB3-1 PE=4 SV=1	1.77886	Condition 1	Condition 2	0.000468958	9.53059	4940.46	4887.83	4732.42	2596.23	3028.06	2561.13	4952.58	4945.08	4536.77	2596.23	2955.7	2454.84	1	1	1	1	1	1
45.96_664.3942n	No	2	#563,#2312	1,2	45.9558	664.394	7.5806	VHPSIL		B2Y2Q4	Low molecular weight glutenin subunit OS=Triticum aestivum OX=4565 GN=GluB3-1 PE=4 SV=1	1.94431	Condition 2	Condition 1	1.56e-06	2.27569	5811.99	6082.51	5959.01	11483.4	11490.2	11739.1	5826.24	6153.75	5712.65	11483.4	11215.6	11251.9	2	1	2	0	0	2
43.84_830.3959n	No	2	#2756,#1611	1,2	43.8428	830.396	7.5811	SQQQPPF		B2Y2Q4	Low molecular weight glutenin subunit OS=Triticum aestivum OX=4565 GN=GluB3-1 PE=4 SV=1	1.25905	Condition 1	Condition 2	0.00123527	4.28668	9560.7	10317.9	10296.7	7785.57	8063.56	8117.66	9584.14	10438.7	9870.99	7785.57	7870.86	7780.75	2	2	0	2	2	2
43.79_958.4549n	No	2	#4611,#1021	1,2	43.7914	958.455	7.6329	SQQQQPPF		B2Y2Q4	Low molecular weight glutenin subunit OS=Triticum aestivum OX=4565 GN=GluB3-1 PE=4 SV=1	1.19987	Condition 1	Condition 2	0.00159236	3.04223	13729	14271.7	14502.2	11465.5	11775.7	12181.8	13762.6	14438.9	13902.7	11465.5	11494.3	11676.2	1	2	2	2	2	2
51.47_943.4805n	No	2	#1283,#808	1,2	51.4688	943.481	6.478	SQQQLPPF		B2Y2Q4	Low molecular weight glutenin subunit OS=Triticum aestivum OX=4565 GN=GluB3-1 PE=4 SV=1	1.20854	Condition 2	Condition 1	0.000926353	3.04754	18684	18177.3	17579.2	21856.4	21498.8	22438.5	18729.8	18390.2	16852.4	21856.4	20985.1	21507.3	2	0	2	2	0	0
63.56_1068.6023n	No	2	#8706,#585	1,2	63.5589	1068.6	7.2661	VLPQQQIPF		B2Y2Q4	Low molecular weight glutenin subunit OS=Triticum aestivum OX=4565 GN=GluB3-1 PE=4 SV=1	1.3501	Condition 2	Condition 1	0.00106318	4.482	17988.9	18195.7	16734.7	23057.9	23448.3	24940.3	18033	18408.9	16042.8	23057.9	22887.9	23905.2	1	2	2	2	2	2
57.57_1770.8347n	No	2	#382,#20959	2,3	57.5747	1770.83	7.9101	SQQQQPPFSQQQPPF		B2Y2Q4	Low molecular weight glutenin subunit OS=Triticum aestivum OX=4565 GN=GluB3-1 PE=4 SV=1	1.3931	Condition 1	Condition 2	0.000332537	4.30084	41774.2	39762.2	38354.4	28826.3	27885.7	29348.5	41876.7	40227.9	36768.7	28826.3	27219.3	28130.4	2	2	2	2	1	1
42.76_2778.3114n	No	1	#5862	3	42.7606	2778.31	6.8719	GQCVSQPQQQSQQQLGQQPQQQQL	[3] Carbamidomethyl C	B2Y2Q6	LMW-B2 OS=Triticum aestivum OX=4565 GN=GluB3-2 PE=4 SV=1	126.956	Condition 2	Condition 1	0.0163512	88.1445	48.2818	0	38.7569	3599.46	3932.7	3517.89	48.4002	0	37.1545	3599.46	3838.72	3371.88	0	0	0	1	1	1
61.48_1053.5259n	No	1	#21550	2	61.4816	1053.53	5.4752	GQQPQQQQL		B2Y2Q6	LMW-B2 OS=Triticum aestivum OX=4565 GN=GluB3-2 PE=4 SV=1	2.42881	Condition 1	Condition 2	0.27571	98.8343	45.1982	101.877	118.485	0	72.0265	37.3112	45.3091	103.071	113.587	0	70.3053	35.7626	1	1	0	0	0	0
32.42_1053.5224n	No	1	#10237	2	32.4194	1053.52	6.624	GQQPQQQQL		B2Y2Q6	LMW-B2 OS=Triticum aestivum OX=4565 GN=GluB3-2 PE=4 SV=1	14.4311	Condition 2	Condition 1	0.000314265	43.2947	134.387	115.008	247.852	2413.93	2439.62	2322.28	134.716	116.355	237.605	2413.93	2381.32	2225.89	0	0	0	1	1	1
36.83_1742.8022n	No	1	#3735	2	36.833	1742.8	7.6797	GQCVSQPQQQSQQQL	[3] Carbamidomethyl C	B2Y2Q6	LMW-B2 OS=Triticum aestivum OX=4565 GN=GluB3-2 PE=4 SV=1	10.485	Condition 2	Condition 1	4.94e-06	10.9553	419.589	336.707	386.867	3966.28	3801.61	4218.22	420.618	340.65	370.873	3966.28	3710.76	4043.15	0	0	0	1	1	1
52.93_1521.7608n	No	1	#14928	2	52.9301	1521.76	6.4904	QQQQPSLPQQPPF		B2Y2Q6	LMW-B2 OS=Triticum aestivum OX=4565 GN=GluB3-2 PE=4 SV=1	4.16619	Condition 1	Condition 2	0.00736959	56.066	496.434	469.42	526.78	196.255	73.5306	88.4872	497.651	474.918	505.002	196.255	71.7735	84.8147	1	0	1	1	1	1
42.17_704.3688n	No	1	#5619	1	42.1666	704.369	5.0954	ARSQML		B2Y2Q6	LMW-B2 OS=Triticum aestivum OX=4565 GN=GluB3-2 PE=4 SV=1	1.24367	Condition 2	Condition 1	0.00390763	5.25972	538.652	505.579	507.467	619.305	681.971	628.527	539.973	511.501	486.487	619.305	665.674	602.441	0	0	0	1	1	0
32.97_1783.8604n	No	1	#12726	3	32.968	1783.86	5.2923	SQQQPPFSQQQQQPL	[5] Hydroxyproline	B2Y2Q6	LMW-B2 OS=Triticum aestivum OX=4565 GN=GluB3-2 PE=4 SV=1	2.95644	Condition 1	Condition 2	0.00187194	25.9716	609.104	620.083	574.276	196.098	154.52	259.393	610.597	627.345	550.534	196.098	150.828	248.627	1	0	1	0	0	0
44.01_743.3620n	No	1	#7023	2	44.0057	743.362	6.9742	QQQPPF		B2Y2Q6	LMW-B2 OS=Triticum aestivum OX=4565 GN=GluB3-2 PE=4 SV=1	1.19507	Condition 1	Condition 2	0.0426256	9.46627	928.685	1094.36	1104.42	900.78	840.345	875.838	930.963	1107.18	1058.76	900.78	820.263	839.488	1	1	1	1	1	1
59.37_1634.8414n	No	1	#13173	2	59.3698	1634.84	6.5694	LQQQQPSLPQQPPF		B2Y2Q6	LMW-B2 OS=Triticum aestivum OX=4565 GN=GluB3-2 PE=4 SV=1	1.70675	Condition 1	Condition 2	0.00219358	9.4721	1410.06	1167.1	1323.78	815.493	784.069	686.041	1413.52	1180.77	1269.05	815.493	765.332	657.568	1	1	0	1	0	0
46.86_907.4772n	No	2	#7473,#2666	1,2	46.8581	907.477	6.7251	RTTTSVPF		B2Y2Q6	LMW-B2 OS=Triticum aestivum OX=4565 GN=GluB3-2 PE=4 SV=1	2.87302	Condition 2	Condition 1	1.14e-05	5.20525	1285.98	1361.45	1227.34	3623.85	3607.56	3900.87	1289.13	1377.39	1176.59	3623.85	3521.35	3738.97	1	0	2	2	2	0
58.35_2709.2842n	No	1	#13239	3	58.3481	2709.28	6.2809	SQQQQPPFSQQQPPFSQQQQQPL	[17] Deamidation Q	B2Y2Q6	LMW-B2 OS=Triticum aestivum OX=4565 GN=GluB3-2 PE=4 SV=1	2.30739	Condition 2	Condition 1	0.00131804	18.9946	2186.53	1589.6	1603.74	4233.07	4148.83	4031.56	2191.89	1608.21	1537.44	4233.07	4049.68	3864.23	1	0	0	1	1	0
51.98_1132.5769n	No	1	#1421	2	51.9766	1132.58	7.6263	QQLNPCKVF	[6] Carbamidomethyl C	B2Y2Q6	LMW-B2 OS=Triticum aestivum OX=4565 GN=GluB3-2 PE=4 SV=1	10.3262	Condition 2	Condition 1	3.54e-07	5.23417	1533.53	1701.68	1639.93	17179.3	16122.3	17040	1537.29	1721.61	1572.13	17179.3	15737.1	16332.7	1	1	1	1	1	1
48.30_1046.5927n	No	1	#1587	2	48.3004	1046.59	7.525	LQPHQIAQL		B2Y2Q6	LMW-B2 OS=Triticum aestivum OX=4565 GN=GluB3-2 PE=4 SV=1	4.13715	Condition 2	Condition 1	1.32e-05	8.55766	1833.09	1891.29	2001.53	8675.71	7538.52	7474.68	1837.58	1913.44	1918.78	8675.71	7358.37	7164.46	1	1	1	1	1	1
68.00_2360.1886n	No	1	#5658	3	67.9969	2360.19	6.028	QQQPPFLQQQQPSLPQQPPF		B2Y2Q6	LMW-B2 OS=Triticum aestivum OX=4565 GN=GluB3-2 PE=4 SV=1	1.36043	Condition 1	Condition 2	0.00252325	6.59338	2910.37	2866.87	2682.97	2200.27	2090.01	1928.52	2917.51	2900.45	2572.05	2200.27	2040.06	1848.48	1	1	1	1	1	1
56.12_1086.5364n	No	1	#2114	2	56.1157	1086.54	6.7688	YRTTTSVPF	[8] Hydroxyproline	B2Y2Q6	LMW-B2 OS=Triticum aestivum OX=4565 GN=GluB3-2 PE=4 SV=1	1.09696	Condition 1	Condition 2	0.0215106	4.25025	3654.63	3530.08	3357.23	3183.71	3192.8	3233.67	3663.6	3571.42	3218.43	3183.71	3116.5	3099.47	0	0	1	0	1	0
31.47_933.5079n	No	1	#1490	2	31.4657	933.508	6.2321	QPHQIAQL		B2Y2Q6	LMW-B2 OS=Triticum aestivum OX=4565 GN=GluB3-2 PE=4 SV=1	1.1173	Condition 1	Condition 2	0.016643	4.18749	4152.71	4487.04	4447.46	3805.14	3927.09	3980.99	4162.89	4539.59	4263.59	3805.14	3833.25	3815.76	1	1	1	1	1	1
45.96_664.3942n	No	2	#563,#2312	1,2	45.9558	664.394	7.5806	VHPSIL		B2Y2Q6	LMW-B2 OS=Triticum aestivum OX=4565 GN=GluB3-2 PE=4 SV=1	1.94431	Condition 2	Condition 1	1.56e-06	2.27569	5811.99	6082.51	5959.01	11483.4	11490.2	11739.1	5826.24	6153.75	5712.65	11483.4	11215.6	11251.9	2	1	2	0	0	2
32.27_955.4744n	No	1	#2393	2	32.2715	955.474	7.2364	SQQQQQPL		B2Y2Q6	LMW-B2 OS=Triticum aestivum OX=4565 GN=GluB3-2 PE=4 SV=1	1.08165	Condition 1	Condition 2	0.214213	7.16062	6538.18	6541.67	7386.02	5961.53	6258.72	6700.77	6554.21	6618.29	7080.66	5961.53	6109.16	6422.66	1	0	1	1	1	0
32.40_820.3757n	No	1	#241	1	32.4023	820.376	5.5624	SQQQSPF		B2Y2Q6	LMW-B2 OS=Triticum aestivum OX=4565 GN=GluB3-2 PE=4 SV=1	4.57275	Condition 2	Condition 1	2.46e-06	5.50096	6606.59	7375.97	7027.01	30737.1	32237.4	33096.9	6622.79	7462.35	6736.49	30737.1	31467.1	31723.3	1	0	0	1	0	1
43.84_830.3959n	No	2	#2756,#1611	1,2	43.8428	830.396	7.5811	SQQQPPF		B2Y2Q6	LMW-B2 OS=Triticum aestivum OX=4565 GN=GluB3-2 PE=4 SV=1	1.25905	Condition 1	Condition 2	0.00123527	4.28668	9560.7	10317.9	10296.7	7785.57	8063.56	8117.66	9584.14	10438.7	9870.99	7785.57	7870.86	7780.75	2	2	0	2	2	2
62.84_1745.8361n	No	1	#4682	2	62.8388	1745.84	6.8409	SQQQLPPFSQQQSPF		B2Y2Q6	LMW-B2 OS=Triticum aestivum OX=4565 GN=GluB3-2 PE=4 SV=1	1.14949	Condition 1	Condition 2	0.00267134	2.80753	11073.3	11344.3	10725.6	9441.23	9862.24	9529.42	11100.4	11477.2	10282.2	9441.23	9626.56	9133.91	1	0	0	1	0	1
43.79_958.4549n	No	2	#4611,#1021	1,2	43.7914	958.455	7.6329	SQQQQPPF		B2Y2Q6	LMW-B2 OS=Triticum aestivum OX=4565 GN=GluB3-2 PE=4 SV=1	1.19987	Condition 1	Condition 2	0.00159236	3.04223	13729	14271.7	14502.2	11465.5	11775.7	12181.8	13762.6	14438.9	13902.7	11465.5	11494.3	11676.2	1	2	2	2	2	2
49.43_1767.8553n	No	1	#1363	2	49.4253	1767.86	7.5406	SQQQPPFSQQQQQPL		B2Y2Q6	LMW-B2 OS=Triticum aestivum OX=4565 GN=GluB3-2 PE=4 SV=1	1.67808	Condition 1	Condition 2	7.91e-05	5.21312	16621	15426.1	15054.6	9367.47	9193	9508.42	16661.8	15606.8	14432.2	9367.47	8973.31	9113.79	1	1	1	1	1	1
51.47_943.4805n	No	2	#1283,#808	1,2	51.4688	943.481	6.478	SQQQLPPF		B2Y2Q6	LMW-B2 OS=Triticum aestivum OX=4565 GN=GluB3-2 PE=4 SV=1	1.20854	Condition 2	Condition 1	0.000926353	3.04754	18684	18177.3	17579.2	21856.4	21498.8	22438.5	18729.8	18390.2	16852.4	21856.4	20985.1	21507.3	2	0	2	2	0	0
63.56_1068.6023n	No	2	#8706,#585	1,2	63.5589	1068.6	7.2661	VLPQQQIPF		B2Y2Q6	LMW-B2 OS=Triticum aestivum OX=4565 GN=GluB3-2 PE=4 SV=1	1.3501	Condition 2	Condition 1	0.00106318	4.482	17988.9	18195.7	16734.7	23057.9	23448.3	24940.3	18033	18408.9	16042.8	23057.9	22887.9	23905.2	1	2	2	2	2	2
57.57_2708.2980n	No	1	#940	3	57.5661	2708.3	7.5466	SQQQQPPFSQQQPPFSQQQQQPL		B2Y2Q6	LMW-B2 OS=Triticum aestivum OX=4565 GN=GluB3-2 PE=4 SV=1	1.801	Condition 2	Condition 1	0.000126847	6.98967	27253.3	25144	23728.7	45663.3	45440	45999.4	27320.1	25438.5	22747.7	45663.3	44354.2	44090.3	1	1	1	1	1	1
57.57_1770.8347n	No	2	#382,#20959	2,3	57.5747	1770.83	7.9101	SQQQQPPFSQQQPPF		B2Y2Q6	LMW-B2 OS=Triticum aestivum OX=4565 GN=GluB3-2 PE=4 SV=1	1.3931	Condition 1	Condition 2	0.000332537	4.30084	41774.2	39762.2	38354.4	28826.3	27885.7	29348.5	41876.7	40227.9	36768.7	28826.3	27219.3	28130.4	2	2	2	2	1	1
42.76_2778.3114n	No	1	#5862	3	42.7606	2778.31	6.8719	GQCVSQPQQQSQQQLGQQPQQQQL	[3] Carbamidomethyl C	B2Y2Q7	Low molecular weight glutenin OS=Triticum aestivum OX=4565 GN=GluB3-2 PE=2 SV=1	126.956	Condition 2	Condition 1	0.0163512	88.1445	48.2818	0	38.7569	3599.46	3932.7	3517.89	48.4002	0	37.1545	3599.46	3838.72	3371.88	0	0	0	1	1	1
61.48_1053.5259n	No	1	#21550	2	61.4816	1053.53	5.4752	GQQPQQQQL		B2Y2Q7	Low molecular weight glutenin OS=Triticum aestivum OX=4565 GN=GluB3-2 PE=2 SV=1	2.42881	Condition 1	Condition 2	0.27571	98.8343	45.1982	101.877	118.485	0	72.0265	37.3112	45.3091	103.071	113.587	0	70.3053	35.7626	1	1	0	0	0	0
32.42_1053.5224n	No	1	#10237	2	32.4194	1053.52	6.624	GQQPQQQQL		B2Y2Q7	Low molecular weight glutenin OS=Triticum aestivum OX=4565 GN=GluB3-2 PE=2 SV=1	14.4311	Condition 2	Condition 1	0.000314265	43.2947	134.387	115.008	247.852	2413.93	2439.62	2322.28	134.716	116.355	237.605	2413.93	2381.32	2225.89	0	0	0	1	1	1
36.83_1742.8022n	No	1	#3735	2	36.833	1742.8	7.6797	GQCVSQPQQQSQQQL	[3] Carbamidomethyl C	B2Y2Q7	Low molecular weight glutenin OS=Triticum aestivum OX=4565 GN=GluB3-2 PE=2 SV=1	10.485	Condition 2	Condition 1	4.94e-06	10.9553	419.589	336.707	386.867	3966.28	3801.61	4218.22	420.618	340.65	370.873	3966.28	3710.76	4043.15	0	0	0	1	1	1
52.93_1521.7608n	No	1	#14928	2	52.9301	1521.76	6.4904	QQQQPSLPQQPPF		B2Y2Q7	Low molecular weight glutenin OS=Triticum aestivum OX=4565 GN=GluB3-2 PE=2 SV=1	4.16619	Condition 1	Condition 2	0.00736959	56.066	496.434	469.42	526.78	196.255	73.5306	88.4872	497.651	474.918	505.002	196.255	71.7735	84.8147	1	0	1	1	1	1
42.17_704.3688n	No	1	#5619	1	42.1666	704.369	5.0954	ARSQML		B2Y2Q7	Low molecular weight glutenin OS=Triticum aestivum OX=4565 GN=GluB3-2 PE=2 SV=1	1.24367	Condition 2	Condition 1	0.00390763	5.25972	538.652	505.579	507.467	619.305	681.971	628.527	539.973	511.501	486.487	619.305	665.674	602.441	0	0	0	1	1	0
32.97_1783.8604n	No	1	#12726	3	32.968	1783.86	5.2923	SQQQPPFSQQQQQPL	[5] Hydroxyproline	B2Y2Q7	Low molecular weight glutenin OS=Triticum aestivum OX=4565 GN=GluB3-2 PE=2 SV=1	2.95644	Condition 1	Condition 2	0.00187194	25.9716	609.104	620.083	574.276	196.098	154.52	259.393	610.597	627.345	550.534	196.098	150.828	248.627	1	0	1	0	0	0
44.01_743.3620n	No	1	#7023	2	44.0057	743.362	6.9742	QQQPPF		B2Y2Q7	Low molecular weight glutenin OS=Triticum aestivum OX=4565 GN=GluB3-2 PE=2 SV=1	1.19507	Condition 1	Condition 2	0.0426256	9.46627	928.685	1094.36	1104.42	900.78	840.345	875.838	930.963	1107.18	1058.76	900.78	820.263	839.488	1	1	1	1	1	1
59.37_1634.8414n	No	1	#13173	2	59.3698	1634.84	6.5694	LQQQQPSLPQQPPF		B2Y2Q7	Low molecular weight glutenin OS=Triticum aestivum OX=4565 GN=GluB3-2 PE=2 SV=1	1.70675	Condition 1	Condition 2	0.00219358	9.4721	1410.06	1167.1	1323.78	815.493	784.069	686.041	1413.52	1180.77	1269.05	815.493	765.332	657.568	1	1	0	1	0	0
35.66_1683.7631n	No	1	#2753	2	35.6567	1683.76	7.6879	SQQQPCSQQQQQPL	[6] Carbamidomethyl C	B2Y2Q7	Low molecular weight glutenin OS=Triticum aestivum OX=4565 GN=GluB3-2 PE=2 SV=1	8.47551	Condition 2	Condition 1	9.94e-07	6.24095	1208.89	1317.84	1367.2	10503.3	11191.8	11307.9	1211.85	1333.27	1310.68	10503.3	10924.4	10838.6	1	1	1	1	1	1
46.86_907.4772n	No	2	#7473,#2666	1,2	46.8581	907.477	6.7251	RTTTSVPF		B2Y2Q7	Low molecular weight glutenin OS=Triticum aestivum OX=4565 GN=GluB3-2 PE=2 SV=1	2.87302	Condition 2	Condition 1	1.14e-05	5.20525	1285.98	1361.45	1227.34	3623.85	3607.56	3900.87	1289.13	1377.39	1176.59	3623.85	3521.35	3738.97	1	0	2	2	2	0
58.35_2709.2842n	No	1	#13239	3	58.3481	2709.28	6.2809	SQQQQPPFSQQQPPFSQQQQQPL	[17] Deamidation Q	B2Y2Q7	Low molecular weight glutenin OS=Triticum aestivum OX=4565 GN=GluB3-2 PE=2 SV=1	2.30739	Condition 2	Condition 1	0.00131804	18.9946	2186.53	1589.6	1603.74	4233.07	4148.83	4031.56	2191.89	1608.21	1537.44	4233.07	4049.68	3864.23	1	0	0	1	1	0
51.98_1132.5769n	No	1	#1421	2	51.9766	1132.58	7.6263	QQLNPCKVF	[6] Carbamidomethyl C	B2Y2Q7	Low molecular weight glutenin OS=Triticum aestivum OX=4565 GN=GluB3-2 PE=2 SV=1	10.3262	Condition 2	Condition 1	3.54e-07	5.23417	1533.53	1701.68	1639.93	17179.3	16122.3	17040	1537.29	1721.61	1572.13	17179.3	15737.1	16332.7	1	1	1	1	1	1
48.30_1046.5927n	No	1	#1587	2	48.3004	1046.59	7.525	LQPHQIAQL		B2Y2Q7	Low molecular weight glutenin OS=Triticum aestivum OX=4565 GN=GluB3-2 PE=2 SV=1	4.13715	Condition 2	Condition 1	1.32e-05	8.55766	1833.09	1891.29	2001.53	8675.71	7538.52	7474.68	1837.58	1913.44	1918.78	8675.71	7358.37	7164.46	1	1	1	1	1	1
68.00_2360.1886n	No	1	#5658	3	67.9969	2360.19	6.028	QQQPPFLQQQQPSLPQQPPF		B2Y2Q7	Low molecular weight glutenin OS=Triticum aestivum OX=4565 GN=GluB3-2 PE=2 SV=1	1.36043	Condition 1	Condition 2	0.00252325	6.59338	2910.37	2866.87	2682.97	2200.27	2090.01	1928.52	2917.51	2900.45	2572.05	2200.27	2040.06	1848.48	1	1	1	1	1	1
56.12_1086.5364n	No	1	#2114	2	56.1157	1086.54	6.7688	YRTTTSVPF	[8] Hydroxyproline	B2Y2Q7	Low molecular weight glutenin OS=Triticum aestivum OX=4565 GN=GluB3-2 PE=2 SV=1	1.09696	Condition 1	Condition 2	0.0215106	4.25025	3654.63	3530.08	3357.23	3183.71	3192.8	3233.67	3663.6	3571.42	3218.43	3183.71	3116.5	3099.47	0	0	1	0	1	0
31.47_933.5079n	No	1	#1490	2	31.4657	933.508	6.2321	QPHQIAQL		B2Y2Q7	Low molecular weight glutenin OS=Triticum aestivum OX=4565 GN=GluB3-2 PE=2 SV=1	1.1173	Condition 1	Condition 2	0.016643	4.18749	4152.71	4487.04	4447.46	3805.14	3927.09	3980.99	4162.89	4539.59	4263.59	3805.14	3833.25	3815.76	1	1	1	1	1	1
45.96_664.3942n	No	2	#563,#2312	1,2	45.9558	664.394	7.5806	VHPSIL		B2Y2Q7	Low molecular weight glutenin OS=Triticum aestivum OX=4565 GN=GluB3-2 PE=2 SV=1	1.94431	Condition 2	Condition 1	1.56e-06	2.27569	5811.99	6082.51	5959.01	11483.4	11490.2	11739.1	5826.24	6153.75	5712.65	11483.4	11215.6	11251.9	2	1	2	0	0	2
32.27_955.4744n	No	1	#2393	2	32.2715	955.474	7.2364	SQQQQQPL		B2Y2Q7	Low molecular weight glutenin OS=Triticum aestivum OX=4565 GN=GluB3-2 PE=2 SV=1	1.08165	Condition 1	Condition 2	0.214213	7.16062	6538.18	6541.67	7386.02	5961.53	6258.72	6700.77	6554.21	6618.29	7080.66	5961.53	6109.16	6422.66	1	0	1	1	1	0
32.40_820.3757n	No	1	#241	1	32.4023	820.376	5.5624	SQQQSPF		B2Y2Q7	Low molecular weight glutenin OS=Triticum aestivum OX=4565 GN=GluB3-2 PE=2 SV=1	4.57275	Condition 2	Condition 1	2.46e-06	5.50096	6606.59	7375.97	7027.01	30737.1	32237.4	33096.9	6622.79	7462.35	6736.49	30737.1	31467.1	31723.3	1	0	0	1	0	1
43.84_830.3959n	No	2	#2756,#1611	1,2	43.8428	830.396	7.5811	SQQQPPF		B2Y2Q7	Low molecular weight glutenin OS=Triticum aestivum OX=4565 GN=GluB3-2 PE=2 SV=1	1.25905	Condition 1	Condition 2	0.00123527	4.28668	9560.7	10317.9	10296.7	7785.57	8063.56	8117.66	9584.14	10438.7	9870.99	7785.57	7870.86	7780.75	2	2	0	2	2	2
62.84_1745.8361n	No	1	#4682	2	62.8388	1745.84	6.8409	SQQQLPPFSQQQSPF		B2Y2Q7	Low molecular weight glutenin OS=Triticum aestivum OX=4565 GN=GluB3-2 PE=2 SV=1	1.14949	Condition 1	Condition 2	0.00267134	2.80753	11073.3	11344.3	10725.6	9441.23	9862.24	9529.42	11100.4	11477.2	10282.2	9441.23	9626.56	9133.91	1	0	0	1	0	1
43.79_958.4549n	No	2	#4611,#1021	1,2	43.7914	958.455	7.6329	SQQQQPPF		B2Y2Q7	Low molecular weight glutenin OS=Triticum aestivum OX=4565 GN=GluB3-2 PE=2 SV=1	1.19987	Condition 1	Condition 2	0.00159236	3.04223	13729	14271.7	14502.2	11465.5	11775.7	12181.8	13762.6	14438.9	13902.7	11465.5	11494.3	11676.2	1	2	2	2	2	2
49.43_1767.8553n	No	1	#1363	2	49.4253	1767.86	7.5406	SQQQPPFSQQQQQPL		B2Y2Q7	Low molecular weight glutenin OS=Triticum aestivum OX=4565 GN=GluB3-2 PE=2 SV=1	1.67808	Condition 1	Condition 2	7.91e-05	5.21312	16621	15426.1	15054.6	9367.47	9193	9508.42	16661.8	15606.8	14432.2	9367.47	8973.31	9113.79	1	1	1	1	1	1
51.47_943.4805n	No	2	#1283,#808	1,2	51.4688	943.481	6.478	SQQQLPPF		B2Y2Q7	Low molecular weight glutenin OS=Triticum aestivum OX=4565 GN=GluB3-2 PE=2 SV=1	1.20854	Condition 2	Condition 1	0.000926353	3.04754	18684	18177.3	17579.2	21856.4	21498.8	22438.5	18729.8	18390.2	16852.4	21856.4	20985.1	21507.3	2	0	2	2	0	0
63.56_1068.6023n	No	2	#8706,#585	1,2	63.5589	1068.6	7.2661	VLPQQQIPF		B2Y2Q7	Low molecular weight glutenin OS=Triticum aestivum OX=4565 GN=GluB3-2 PE=2 SV=1	1.3501	Condition 2	Condition 1	0.00106318	4.482	17988.9	18195.7	16734.7	23057.9	23448.3	24940.3	18033	18408.9	16042.8	23057.9	22887.9	23905.2	1	2	2	2	2	2
57.57_2708.2980n	No	1	#940	3	57.5661	2708.3	7.5466	SQQQQPPFSQQQPPFSQQQQQPL		B2Y2Q7	Low molecular weight glutenin OS=Triticum aestivum OX=4565 GN=GluB3-2 PE=2 SV=1	1.801	Condition 2	Condition 1	0.000126847	6.98967	27253.3	25144	23728.7	45663.3	45440	45999.4	27320.1	25438.5	22747.7	45663.3	44354.2	44090.3	1	1	1	1	1	1
57.57_1770.8347n	No	2	#382,#20959	2,3	57.5747	1770.83	7.9101	SQQQQPPFSQQQPPF		B2Y2Q7	Low molecular weight glutenin OS=Triticum aestivum OX=4565 GN=GluB3-2 PE=2 SV=1	1.3931	Condition 1	Condition 2	0.000332537	4.30084	41774.2	39762.2	38354.4	28826.3	27885.7	29348.5	41876.7	40227.9	36768.7	28826.3	27219.3	28130.4	2	2	2	2	1	1
61.48_1053.5259n	No	1	#21550	2	61.4816	1053.53	5.4752	GQQPQQQQL		B2Y2R3	Low molecular weight glutenin subunit OS=Triticum aestivum OX=4565 GN=GluB3-6 PE=4 SV=1	2.42881	Condition 1	Condition 2	0.27571	98.8343	45.1982	101.877	118.485	0	72.0265	37.3112	45.3091	103.071	113.587	0	70.3053	35.7626	1	1	0	0	0	0
32.42_1053.5224n	No	1	#10237	2	32.4194	1053.52	6.624	GQQPQQQQL		B2Y2R3	Low molecular weight glutenin subunit OS=Triticum aestivum OX=4565 GN=GluB3-6 PE=4 SV=1	14.4311	Condition 2	Condition 1	0.000314265	43.2947	134.387	115.008	247.852	2413.93	2439.62	2322.28	134.716	116.355	237.605	2413.93	2381.32	2225.89	0	0	0	1	1	1
36.12_1550.7957n	No	1	#8610	3	36.1196	1550.8	5.3063	QQQLGQQPQQQQL		B2Y2R3	Low molecular weight glutenin subunit OS=Triticum aestivum OX=4565 GN=GluB3-6 PE=4 SV=1	1.01907	Condition 1	Condition 2	0.834245	14.5095	448.466	480.049	545.251	471.1	418.244	556.839	449.566	485.672	522.709	471.1	408.249	533.728	1	1	0	0	0	1
42.17_704.3688n	No	1	#5619	1	42.1666	704.369	5.0954	ARSQML		B2Y2R3	Low molecular weight glutenin subunit OS=Triticum aestivum OX=4565 GN=GluB3-6 PE=4 SV=1	1.24367	Condition 2	Condition 1	0.00390763	5.25972	538.652	505.579	507.467	619.305	681.971	628.527	539.973	511.501	486.487	619.305	665.674	602.441	0	0	0	1	1	0
35.52_872.4738n	No	1	#3070	2	35.5196	872.474	5.816	LQQQIPF		B2Y2R3	Low molecular weight glutenin subunit OS=Triticum aestivum OX=4565 GN=GluB3-6 PE=4 SV=1	4.12526	Condition 2	Condition 1	5.08e-05	12.292	512.98	652.159	622.047	2350.57	2547.34	2474.69	514.238	659.797	596.33	2350.57	2486.47	2371.98	0	0	1	1	0	1
50.68_759.3922n	No	1	#8490	1	50.6802	759.392	6.572	QQQIPF		B2Y2R3	Low molecular weight glutenin subunit OS=Triticum aestivum OX=4565 GN=GluB3-6 PE=4 SV=1	1.34186	Condition 2	Condition 1	0.0396424	12.5066	574.695	714.399	725.282	908.425	799.765	994.825	576.104	722.766	695.297	908.425	780.654	953.537	0	0	1	1	0	0
51.98_1132.5769n	No	1	#1421	2	51.9766	1132.58	7.6263	QQLNPCKVF	[6] Carbamidomethyl C	B2Y2R3	Low molecular weight glutenin subunit OS=Triticum aestivum OX=4565 GN=GluB3-6 PE=4 SV=1	10.3262	Condition 2	Condition 1	3.54e-07	5.23417	1533.53	1701.68	1639.93	17179.3	16122.3	17040	1537.29	1721.61	1572.13	17179.3	15737.1	16332.7	1	1	1	1	1	1
48.30_1046.5927n	No	1	#1587	2	48.3004	1046.59	7.525	LQPHQIAQL		B2Y2R3	Low molecular weight glutenin subunit OS=Triticum aestivum OX=4565 GN=GluB3-6 PE=4 SV=1	4.13715	Condition 2	Condition 1	1.32e-05	8.55766	1833.09	1891.29	2001.53	8675.71	7538.52	7474.68	1837.58	1913.44	1918.78	8675.71	7358.37	7164.46	1	1	1	1	1	1
56.08_1898.8836n	No	1	#7197	2	56.0815	1898.88	6.9183	SQQQQPPFSQQQQPPF		B2Y2R3	Low molecular weight glutenin subunit OS=Triticum aestivum OX=4565 GN=GluB3-6 PE=4 SV=1	1.35294	Condition 1	Condition 2	7.39e-05	2.9623	2041.16	2023.78	2003.68	1508.95	1445.63	1530.93	2046.16	2047.49	1920.84	1508.95	1411.08	1467.39	1	1	1	1	0	1
49.05_1271.5975n	No	1	#2355	2	49.0482	1271.6	5.3645	GQCVSQPQQQL	[3] Carbamidomethyl C	B2Y2R3	Low molecular weight glutenin subunit OS=Triticum aestivum OX=4565 GN=GluB3-6 PE=4 SV=1	1.1701	Condition 2	Condition 1	0.00303026	3.08402	3692.94	3722.76	3899.39	4337.25	4332.13	4570.39	3701.99	3766.36	3738.18	4337.25	4228.6	4380.7	0	0	1	0	0	1
31.47_933.5079n	No	1	#1490	2	31.4657	933.508	6.2321	QPHQIAQL		B2Y2R3	Low molecular weight glutenin subunit OS=Triticum aestivum OX=4565 GN=GluB3-6 PE=4 SV=1	1.1173	Condition 1	Condition 2	0.016643	4.18749	4152.71	4487.04	4447.46	3805.14	3927.09	3980.99	4162.89	4539.59	4263.59	3805.14	3833.25	3815.76	1	1	1	1	1	1
60.41_1620.8255n	No	1	#2953	2	60.4086	1620.83	7.2832	SQQQQPVLPQQPPF		B2Y2R3	Low molecular weight glutenin subunit OS=Triticum aestivum OX=4565 GN=GluB3-6 PE=4 SV=1	1.77886	Condition 1	Condition 2	0.000468958	9.53059	4940.46	4887.83	4732.42	2596.23	3028.06	2561.13	4952.58	4945.08	4536.77	2596.23	2955.7	2454.84	1	1	1	1	1	1
64.03_1534.8522n	No	1	#1436	2	64.0317	1534.85	6.1501	LQQQIPFVHPSIL	[10] Hydroxyproline	B2Y2R3	Low molecular weight glutenin subunit OS=Triticum aestivum OX=4565 GN=GluB3-6 PE=4 SV=1	1.83587	Condition 2	Condition 1	2.47e-05	3.48756	5292.12	5118.52	4935.36	9113.47	9716.91	9342.94	5305.1	5178.47	4731.32	9113.47	9484.7	8955.18	0	0	1	1	0	0
45.96_664.3942n	No	2	#563,#2312	1,2	45.9558	664.394	7.5806	VHPSIL		B2Y2R3	Low molecular weight glutenin subunit OS=Triticum aestivum OX=4565 GN=GluB3-6 PE=4 SV=1	1.94431	Condition 2	Condition 1	1.56e-06	2.27569	5811.99	6082.51	5959.01	11483.4	11490.2	11739.1	5826.24	6153.75	5712.65	11483.4	11215.6	11251.9	2	1	2	0	0	2
43.79_958.4549n	No	2	#4611,#1021	1,2	43.7914	958.455	7.6329	SQQQQPPF		B2Y2R3	Low molecular weight glutenin subunit OS=Triticum aestivum OX=4565 GN=GluB3-6 PE=4 SV=1	1.19987	Condition 1	Condition 2	0.00159236	3.04223	13729	14271.7	14502.2	11465.5	11775.7	12181.8	13762.6	14438.9	13902.7	11465.5	11494.3	11676.2	1	2	2	2	2	2
51.47_943.4805n	No	2	#1283,#808	1,2	51.4688	943.481	6.478	SQQQLPPF		B2Y2R3	Low molecular weight glutenin subunit OS=Triticum aestivum OX=4565 GN=GluB3-6 PE=4 SV=1	1.20854	Condition 2	Condition 1	0.000926353	3.04754	18684	18177.3	17579.2	21856.4	21498.8	22438.5	18729.8	18390.2	16852.4	21856.4	20985.1	21507.3	2	0	2	2	0	0
42.76_2778.3114n	No	1	#5862	3	42.7606	2778.31	6.8719	GQCVSQPQQQSQQQLGQQPQQQQL	[3] Carbamidomethyl C	B2Y2R4	Low molecular weight glutenin subunit OS=Triticum aestivum OX=4565 GN=GluB3-6 PE=4 SV=1	126.956	Condition 2	Condition 1	0.0163512	88.1445	48.2818	0	38.7569	3599.46	3932.7	3517.89	48.4002	0	37.1545	3599.46	3838.72	3371.88	0	0	0	1	1	1
61.48_1053.5259n	No	1	#21550	2	61.4816	1053.53	5.4752	GQQPQQQQL		B2Y2R4	Low molecular weight glutenin subunit OS=Triticum aestivum OX=4565 GN=GluB3-6 PE=4 SV=1	2.42881	Condition 1	Condition 2	0.27571	98.8343	45.1982	101.877	118.485	0	72.0265	37.3112	45.3091	103.071	113.587	0	70.3053	35.7626	1	1	0	0	0	0
32.42_1053.5224n	No	1	#10237	2	32.4194	1053.52	6.624	GQQPQQQQL		B2Y2R4	Low molecular weight glutenin subunit OS=Triticum aestivum OX=4565 GN=GluB3-6 PE=4 SV=1	14.4311	Condition 2	Condition 1	0.000314265	43.2947	134.387	115.008	247.852	2413.93	2439.62	2322.28	134.716	116.355	237.605	2413.93	2381.32	2225.89	0	0	0	1	1	1
36.83_1742.8022n	No	1	#3735	2	36.833	1742.8	7.6797	GQCVSQPQQQSQQQL	[3] Carbamidomethyl C	B2Y2R4	Low molecular weight glutenin subunit OS=Triticum aestivum OX=4565 GN=GluB3-6 PE=4 SV=1	10.485	Condition 2	Condition 1	4.94e-06	10.9553	419.589	336.707	386.867	3966.28	3801.61	4218.22	420.618	340.65	370.873	3966.28	3710.76	4043.15	0	0	0	1	1	1
42.17_704.3688n	No	1	#5619	1	42.1666	704.369	5.0954	ARSQML		B2Y2R4	Low molecular weight glutenin subunit OS=Triticum aestivum OX=4565 GN=GluB3-6 PE=4 SV=1	1.24367	Condition 2	Condition 1	0.00390763	5.25972	538.652	505.579	507.467	619.305	681.971	628.527	539.973	511.501	486.487	619.305	665.674	602.441	0	0	0	1	1	0
35.52_872.4738n	No	1	#3070	2	35.5196	872.474	5.816	LQQQIPF		B2Y2R4	Low molecular weight glutenin subunit OS=Triticum aestivum OX=4565 GN=GluB3-6 PE=4 SV=1	4.12526	Condition 2	Condition 1	5.08e-05	12.292	512.98	652.159	622.047	2350.57	2547.34	2474.69	514.238	659.797	596.33	2350.57	2486.47	2371.98	0	0	1	1	0	1
50.68_759.3922n	No	1	#8490	1	50.6802	759.392	6.572	QQQIPF		B2Y2R4	Low molecular weight glutenin subunit OS=Triticum aestivum OX=4565 GN=GluB3-6 PE=4 SV=1	1.34186	Condition 2	Condition 1	0.0396424	12.5066	574.695	714.399	725.282	908.425	799.765	994.825	576.104	722.766	695.297	908.425	780.654	953.537	0	0	1	1	0	0
51.98_1132.5769n	No	1	#1421	2	51.9766	1132.58	7.6263	QQLNPCKVF	[6] Carbamidomethyl C	B2Y2R4	Low molecular weight glutenin subunit OS=Triticum aestivum OX=4565 GN=GluB3-6 PE=4 SV=1	10.3262	Condition 2	Condition 1	3.54e-07	5.23417	1533.53	1701.68	1639.93	17179.3	16122.3	17040	1537.29	1721.61	1572.13	17179.3	15737.1	16332.7	1	1	1	1	1	1
48.30_1046.5927n	No	1	#1587	2	48.3004	1046.59	7.525	LQPHQIAQL		B2Y2R4	Low molecular weight glutenin subunit OS=Triticum aestivum OX=4565 GN=GluB3-6 PE=4 SV=1	4.13715	Condition 2	Condition 1	1.32e-05	8.55766	1833.09	1891.29	2001.53	8675.71	7538.52	7474.68	1837.58	1913.44	1918.78	8675.71	7358.37	7164.46	1	1	1	1	1	1
56.08_1898.8836n	No	1	#7197	2	56.0815	1898.88	6.9183	SQQQQPPFSQQQQPPF		B2Y2R4	Low molecular weight glutenin subunit OS=Triticum aestivum OX=4565 GN=GluB3-6 PE=4 SV=1	1.35294	Condition 1	Condition 2	7.39e-05	2.9623	2041.16	2023.78	2003.68	1508.95	1445.63	1530.93	2046.16	2047.49	1920.84	1508.95	1411.08	1467.39	1	1	1	1	0	1
31.47_933.5079n	No	1	#1490	2	31.4657	933.508	6.2321	QPHQIAQL		B2Y2R4	Low molecular weight glutenin subunit OS=Triticum aestivum OX=4565 GN=GluB3-6 PE=4 SV=1	1.1173	Condition 1	Condition 2	0.016643	4.18749	4152.71	4487.04	4447.46	3805.14	3927.09	3980.99	4162.89	4539.59	4263.59	3805.14	3833.25	3815.76	1	1	1	1	1	1
60.41_1620.8255n	No	1	#2953	2	60.4086	1620.83	7.2832	SQQQQPVLPQQPPF		B2Y2R4	Low molecular weight glutenin subunit OS=Triticum aestivum OX=4565 GN=GluB3-6 PE=4 SV=1	1.77886	Condition 1	Condition 2	0.000468958	9.53059	4940.46	4887.83	4732.42	2596.23	3028.06	2561.13	4952.58	4945.08	4536.77	2596.23	2955.7	2454.84	1	1	1	1	1	1
64.03_1534.8522n	No	1	#1436	2	64.0317	1534.85	6.1501	LQQQIPFVHPSIL	[10] Hydroxyproline	B2Y2R4	Low molecular weight glutenin subunit OS=Triticum aestivum OX=4565 GN=GluB3-6 PE=4 SV=1	1.83587	Condition 2	Condition 1	2.47e-05	3.48756	5292.12	5118.52	4935.36	9113.47	9716.91	9342.94	5305.1	5178.47	4731.32	9113.47	9484.7	8955.18	0	0	1	1	0	0
45.96_664.3942n	No	2	#563,#2312	1,2	45.9558	664.394	7.5806	VHPSIL		B2Y2R4	Low molecular weight glutenin subunit OS=Triticum aestivum OX=4565 GN=GluB3-6 PE=4 SV=1	1.94431	Condition 2	Condition 1	1.56e-06	2.27569	5811.99	6082.51	5959.01	11483.4	11490.2	11739.1	5826.24	6153.75	5712.65	11483.4	11215.6	11251.9	2	1	2	0	0	2
43.79_958.4549n	No	2	#4611,#1021	1,2	43.7914	958.455	7.6329	SQQQQPPF		B2Y2R4	Low molecular weight glutenin subunit OS=Triticum aestivum OX=4565 GN=GluB3-6 PE=4 SV=1	1.19987	Condition 1	Condition 2	0.00159236	3.04223	13729	14271.7	14502.2	11465.5	11775.7	12181.8	13762.6	14438.9	13902.7	11465.5	11494.3	11676.2	1	2	2	2	2	2
51.47_943.4805n	No	2	#1283,#808	1,2	51.4688	943.481	6.478	SQQQLPPF		B2Y2R4	Low molecular weight glutenin subunit OS=Triticum aestivum OX=4565 GN=GluB3-6 PE=4 SV=1	1.20854	Condition 2	Condition 1	0.000926353	3.04754	18684	18177.3	17579.2	21856.4	21498.8	22438.5	18729.8	18390.2	16852.4	21856.4	20985.1	21507.3	2	0	2	2	0	0
42.76_2778.3114n	No	1	#5862	3	42.7606	2778.31	6.8719	GQCVSQPQQQSQQQLGQQPQQQQL	[3] Carbamidomethyl C	B2Y2R5	Low molecular weight glutenin subunit OS=Triticum aestivum OX=4565 GN=GluB3-6 PE=4 SV=1	126.956	Condition 2	Condition 1	0.0163512	88.1445	48.2818	0	38.7569	3599.46	3932.7	3517.89	48.4002	0	37.1545	3599.46	3838.72	3371.88	0	0	0	1	1	1
61.48_1053.5259n	No	1	#21550	2	61.4816	1053.53	5.4752	GQQPQQQQL		B2Y2R5	Low molecular weight glutenin subunit OS=Triticum aestivum OX=4565 GN=GluB3-6 PE=4 SV=1	2.42881	Condition 1	Condition 2	0.27571	98.8343	45.1982	101.877	118.485	0	72.0265	37.3112	45.3091	103.071	113.587	0	70.3053	35.7626	1	1	0	0	0	0
32.42_1053.5224n	No	1	#10237	2	32.4194	1053.52	6.624	GQQPQQQQL		B2Y2R5	Low molecular weight glutenin subunit OS=Triticum aestivum OX=4565 GN=GluB3-6 PE=4 SV=1	14.4311	Condition 2	Condition 1	0.000314265	43.2947	134.387	115.008	247.852	2413.93	2439.62	2322.28	134.716	116.355	237.605	2413.93	2381.32	2225.89	0	0	0	1	1	1
36.83_1742.8022n	No	1	#3735	2	36.833	1742.8	7.6797	GQCVSQPQQQSQQQL	[3] Carbamidomethyl C	B2Y2R5	Low molecular weight glutenin subunit OS=Triticum aestivum OX=4565 GN=GluB3-6 PE=4 SV=1	10.485	Condition 2	Condition 1	4.94e-06	10.9553	419.589	336.707	386.867	3966.28	3801.61	4218.22	420.618	340.65	370.873	3966.28	3710.76	4043.15	0	0	0	1	1	1
42.17_704.3688n	No	1	#5619	1	42.1666	704.369	5.0954	ARSQML		B2Y2R5	Low molecular weight glutenin subunit OS=Triticum aestivum OX=4565 GN=GluB3-6 PE=4 SV=1	1.24367	Condition 2	Condition 1	0.00390763	5.25972	538.652	505.579	507.467	619.305	681.971	628.527	539.973	511.501	486.487	619.305	665.674	602.441	0	0	0	1	1	0
35.52_872.4738n	No	1	#3070	2	35.5196	872.474	5.816	LQQQIPF		B2Y2R5	Low molecular weight glutenin subunit OS=Triticum aestivum OX=4565 GN=GluB3-6 PE=4 SV=1	4.12526	Condition 2	Condition 1	5.08e-05	12.292	512.98	652.159	622.047	2350.57	2547.34	2474.69	514.238	659.797	596.33	2350.57	2486.47	2371.98	0	0	1	1	0	1
50.68_759.3922n	No	1	#8490	1	50.6802	759.392	6.572	QQQIPF		B2Y2R5	Low molecular weight glutenin subunit OS=Triticum aestivum OX=4565 GN=GluB3-6 PE=4 SV=1	1.34186	Condition 2	Condition 1	0.0396424	12.5066	574.695	714.399	725.282	908.425	799.765	994.825	576.104	722.766	695.297	908.425	780.654	953.537	0	0	1	1	0	0
51.98_1132.5769n	No	1	#1421	2	51.9766	1132.58	7.6263	QQLNPCKVF	[6] Carbamidomethyl C	B2Y2R5	Low molecular weight glutenin subunit OS=Triticum aestivum OX=4565 GN=GluB3-6 PE=4 SV=1	10.3262	Condition 2	Condition 1	3.54e-07	5.23417	1533.53	1701.68	1639.93	17179.3	16122.3	17040	1537.29	1721.61	1572.13	17179.3	15737.1	16332.7	1	1	1	1	1	1
48.30_1046.5927n	No	1	#1587	2	48.3004	1046.59	7.525	LQPHQIAQL		B2Y2R5	Low molecular weight glutenin subunit OS=Triticum aestivum OX=4565 GN=GluB3-6 PE=4 SV=1	4.13715	Condition 2	Condition 1	1.32e-05	8.55766	1833.09	1891.29	2001.53	8675.71	7538.52	7474.68	1837.58	1913.44	1918.78	8675.71	7358.37	7164.46	1	1	1	1	1	1
56.08_1898.8836n	No	1	#7197	2	56.0815	1898.88	6.9183	SQQQQPPFSQQQQPPF		B2Y2R5	Low molecular weight glutenin subunit OS=Triticum aestivum OX=4565 GN=GluB3-6 PE=4 SV=1	1.35294	Condition 1	Condition 2	7.39e-05	2.9623	2041.16	2023.78	2003.68	1508.95	1445.63	1530.93	2046.16	2047.49	1920.84	1508.95	1411.08	1467.39	1	1	1	1	0	1
31.47_933.5079n	No	1	#1490	2	31.4657	933.508	6.2321	QPHQIAQL		B2Y2R5	Low molecular weight glutenin subunit OS=Triticum aestivum OX=4565 GN=GluB3-6 PE=4 SV=1	1.1173	Condition 1	Condition 2	0.016643	4.18749	4152.71	4487.04	4447.46	3805.14	3927.09	3980.99	4162.89	4539.59	4263.59	3805.14	3833.25	3815.76	1	1	1	1	1	1
60.41_1620.8255n	No	1	#2953	2	60.4086	1620.83	7.2832	SQQQQPVLPQQPPF		B2Y2R5	Low molecular weight glutenin subunit OS=Triticum aestivum OX=4565 GN=GluB3-6 PE=4 SV=1	1.77886	Condition 1	Condition 2	0.000468958	9.53059	4940.46	4887.83	4732.42	2596.23	3028.06	2561.13	4952.58	4945.08	4536.77	2596.23	2955.7	2454.84	1	1	1	1	1	1
64.03_1534.8522n	No	1	#1436	2	64.0317	1534.85	6.1501	LQQQIPFVHPSIL	[10] Hydroxyproline	B2Y2R5	Low molecular weight glutenin subunit OS=Triticum aestivum OX=4565 GN=GluB3-6 PE=4 SV=1	1.83587	Condition 2	Condition 1	2.47e-05	3.48756	5292.12	5118.52	4935.36	9113.47	9716.91	9342.94	5305.1	5178.47	4731.32	9113.47	9484.7	8955.18	0	0	1	1	0	0
45.96_664.3942n	No	2	#563,#2312	1,2	45.9558	664.394	7.5806	VHPSIL		B2Y2R5	Low molecular weight glutenin subunit OS=Triticum aestivum OX=4565 GN=GluB3-6 PE=4 SV=1	1.94431	Condition 2	Condition 1	1.56e-06	2.27569	5811.99	6082.51	5959.01	11483.4	11490.2	11739.1	5826.24	6153.75	5712.65	11483.4	11215.6	11251.9	2	1	2	0	0	2
43.79_958.4549n	No	2	#4611,#1021	1,2	43.7914	958.455	7.6329	SQQQQPPF		B2Y2R5	Low molecular weight glutenin subunit OS=Triticum aestivum OX=4565 GN=GluB3-6 PE=4 SV=1	1.19987	Condition 1	Condition 2	0.00159236	3.04223	13729	14271.7	14502.2	11465.5	11775.7	12181.8	13762.6	14438.9	13902.7	11465.5	11494.3	11676.2	1	2	2	2	2	2
51.47_943.4805n	No	2	#1283,#808	1,2	51.4688	943.481	6.478	SQQQLPPF		B2Y2R5	Low molecular weight glutenin subunit OS=Triticum aestivum OX=4565 GN=GluB3-6 PE=4 SV=1	1.20854	Condition 2	Condition 1	0.000926353	3.04754	18684	18177.3	17579.2	21856.4	21498.8	22438.5	18729.8	18390.2	16852.4	21856.4	20985.1	21507.3	2	0	2	2	0	0
42.76_2778.3114n	No	1	#5862	3	42.7606	2778.31	6.8719	GQCVSQPQQQSQQQLGQQPQQQQL	[3] Carbamidomethyl C	B2Y2R6	Low molecular weight glutenin subunit OS=Triticum aestivum OX=4565 GN=GluB3-6 PE=4 SV=1	126.956	Condition 2	Condition 1	0.0163512	88.1445	48.2818	0	38.7569	3599.46	3932.7	3517.89	48.4002	0	37.1545	3599.46	3838.72	3371.88	0	0	0	1	1	1
61.48_1053.5259n	No	1	#21550	2	61.4816	1053.53	5.4752	GQQPQQQQL		B2Y2R6	Low molecular weight glutenin subunit OS=Triticum aestivum OX=4565 GN=GluB3-6 PE=4 SV=1	2.42881	Condition 1	Condition 2	0.27571	98.8343	45.1982	101.877	118.485	0	72.0265	37.3112	45.3091	103.071	113.587	0	70.3053	35.7626	1	1	0	0	0	0
32.42_1053.5224n	No	1	#10237	2	32.4194	1053.52	6.624	GQQPQQQQL		B2Y2R6	Low molecular weight glutenin subunit OS=Triticum aestivum OX=4565 GN=GluB3-6 PE=4 SV=1	14.4311	Condition 2	Condition 1	0.000314265	43.2947	134.387	115.008	247.852	2413.93	2439.62	2322.28	134.716	116.355	237.605	2413.93	2381.32	2225.89	0	0	0	1	1	1
36.83_1742.8022n	No	1	#3735	2	36.833	1742.8	7.6797	GQCVSQPQQQSQQQL	[3] Carbamidomethyl C	B2Y2R6	Low molecular weight glutenin subunit OS=Triticum aestivum OX=4565 GN=GluB3-6 PE=4 SV=1	10.485	Condition 2	Condition 1	4.94e-06	10.9553	419.589	336.707	386.867	3966.28	3801.61	4218.22	420.618	340.65	370.873	3966.28	3710.76	4043.15	0	0	0	1	1	1
42.17_704.3688n	No	1	#5619	1	42.1666	704.369	5.0954	ARSQML		B2Y2R6	Low molecular weight glutenin subunit OS=Triticum aestivum OX=4565 GN=GluB3-6 PE=4 SV=1	1.24367	Condition 2	Condition 1	0.00390763	5.25972	538.652	505.579	507.467	619.305	681.971	628.527	539.973	511.501	486.487	619.305	665.674	602.441	0	0	0	1	1	0
35.52_872.4738n	No	1	#3070	2	35.5196	872.474	5.816	LQQQIPF		B2Y2R6	Low molecular weight glutenin subunit OS=Triticum aestivum OX=4565 GN=GluB3-6 PE=4 SV=1	4.12526	Condition 2	Condition 1	5.08e-05	12.292	512.98	652.159	622.047	2350.57	2547.34	2474.69	514.238	659.797	596.33	2350.57	2486.47	2371.98	0	0	1	1	0	1
50.68_759.3922n	No	1	#8490	1	50.6802	759.392	6.572	QQQIPF		B2Y2R6	Low molecular weight glutenin subunit OS=Triticum aestivum OX=4565 GN=GluB3-6 PE=4 SV=1	1.34186	Condition 2	Condition 1	0.0396424	12.5066	574.695	714.399	725.282	908.425	799.765	994.825	576.104	722.766	695.297	908.425	780.654	953.537	0	0	1	1	0	0
51.98_1132.5769n	No	1	#1421	2	51.9766	1132.58	7.6263	QQLNPCKVF	[6] Carbamidomethyl C	B2Y2R6	Low molecular weight glutenin subunit OS=Triticum aestivum OX=4565 GN=GluB3-6 PE=4 SV=1	10.3262	Condition 2	Condition 1	3.54e-07	5.23417	1533.53	1701.68	1639.93	17179.3	16122.3	17040	1537.29	1721.61	1572.13	17179.3	15737.1	16332.7	1	1	1	1	1	1
48.30_1046.5927n	No	1	#1587	2	48.3004	1046.59	7.525	LQPHQIAQL		B2Y2R6	Low molecular weight glutenin subunit OS=Triticum aestivum OX=4565 GN=GluB3-6 PE=4 SV=1	4.13715	Condition 2	Condition 1	1.32e-05	8.55766	1833.09	1891.29	2001.53	8675.71	7538.52	7474.68	1837.58	1913.44	1918.78	8675.71	7358.37	7164.46	1	1	1	1	1	1
56.08_1898.8836n	No	1	#7197	2	56.0815	1898.88	6.9183	SQQQQPPFSQQQQPPF		B2Y2R6	Low molecular weight glutenin subunit OS=Triticum aestivum OX=4565 GN=GluB3-6 PE=4 SV=1	1.35294	Condition 1	Condition 2	7.39e-05	2.9623	2041.16	2023.78	2003.68	1508.95	1445.63	1530.93	2046.16	2047.49	1920.84	1508.95	1411.08	1467.39	1	1	1	1	0	1
31.47_933.5079n	No	1	#1490	2	31.4657	933.508	6.2321	QPHQIAQL		B2Y2R6	Low molecular weight glutenin subunit OS=Triticum aestivum OX=4565 GN=GluB3-6 PE=4 SV=1	1.1173	Condition 1	Condition 2	0.016643	4.18749	4152.71	4487.04	4447.46	3805.14	3927.09	3980.99	4162.89	4539.59	4263.59	3805.14	3833.25	3815.76	1	1	1	1	1	1
60.41_1620.8255n	No	1	#2953	2	60.4086	1620.83	7.2832	SQQQQPVLPQQPPF		B2Y2R6	Low molecular weight glutenin subunit OS=Triticum aestivum OX=4565 GN=GluB3-6 PE=4 SV=1	1.77886	Condition 1	Condition 2	0.000468958	9.53059	4940.46	4887.83	4732.42	2596.23	3028.06	2561.13	4952.58	4945.08	4536.77	2596.23	2955.7	2454.84	1	1	1	1	1	1
64.03_1534.8522n	No	1	#1436	2	64.0317	1534.85	6.1501	LQQQIPFVHPSIL	[10] Hydroxyproline	B2Y2R6	Low molecular weight glutenin subunit OS=Triticum aestivum OX=4565 GN=GluB3-6 PE=4 SV=1	1.83587	Condition 2	Condition 1	2.47e-05	3.48756	5292.12	5118.52	4935.36	9113.47	9716.91	9342.94	5305.1	5178.47	4731.32	9113.47	9484.7	8955.18	0	0	1	1	0	0
45.96_664.3942n	No	2	#563,#2312	1,2	45.9558	664.394	7.5806	VHPSIL		B2Y2R6	Low molecular weight glutenin subunit OS=Triticum aestivum OX=4565 GN=GluB3-6 PE=4 SV=1	1.94431	Condition 2	Condition 1	1.56e-06	2.27569	5811.99	6082.51	5959.01	11483.4	11490.2	11739.1	5826.24	6153.75	5712.65	11483.4	11215.6	11251.9	2	1	2	0	0	2
43.79_958.4549n	No	2	#4611,#1021	1,2	43.7914	958.455	7.6329	SQQQQPPF		B2Y2R6	Low molecular weight glutenin subunit OS=Triticum aestivum OX=4565 GN=GluB3-6 PE=4 SV=1	1.19987	Condition 1	Condition 2	0.00159236	3.04223	13729	14271.7	14502.2	11465.5	11775.7	12181.8	13762.6	14438.9	13902.7	11465.5	11494.3	11676.2	1	2	2	2	2	2
51.47_943.4805n	No	2	#1283,#808	1,2	51.4688	943.481	6.478	SQQQLPPF		B2Y2R6	Low molecular weight glutenin subunit OS=Triticum aestivum OX=4565 GN=GluB3-6 PE=4 SV=1	1.20854	Condition 2	Condition 1	0.000926353	3.04754	18684	18177.3	17579.2	21856.4	21498.8	22438.5	18729.8	18390.2	16852.4	21856.4	20985.1	21507.3	2	0	2	2	0	0
[truncated: 5,782 more rows]

## Sheet: GluPro v 1.1
																	Normalized abundance						Raw abundance						Spectral counts
[truncated: 3,467 more rows]

## Sheet: GluPro v 1.2
																	Normalized abundance						Raw abundance						Spectral counts
[truncated: 6,533 more rows]
